# Supplementary material
Source: HighWire-hosted journal article supplement (doi:10.1101/gr.281026.125)
Supplement: Supplemental_Fig_S1.pdf [file Supplemental_Fig_S1.pdf]

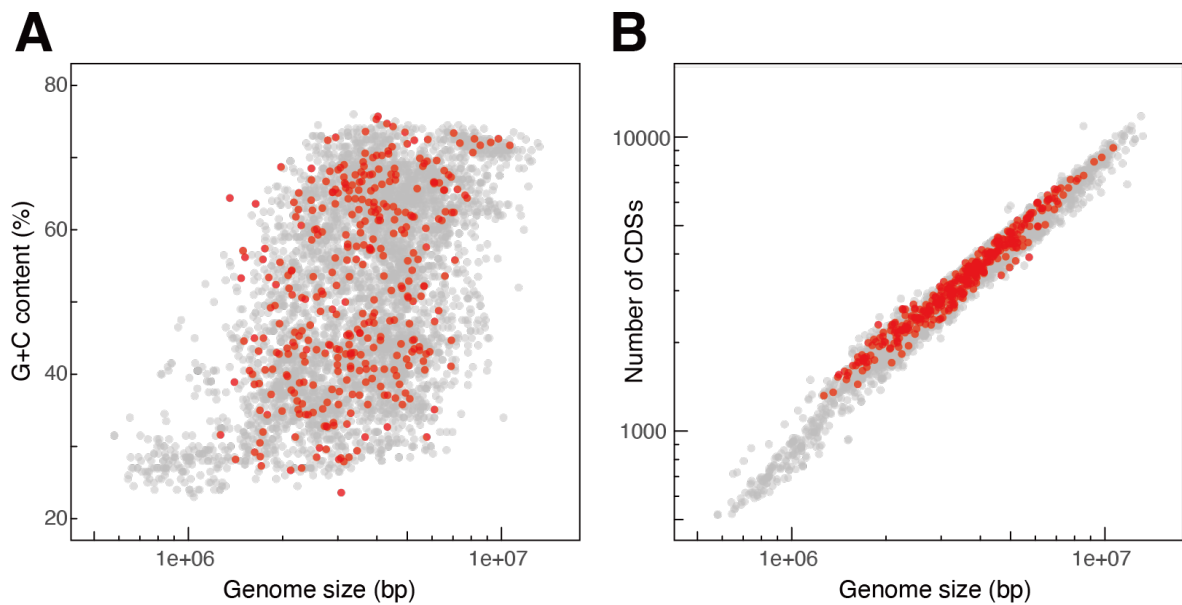

**Fig. S1. Genome size, G+C content, and the number of protein-coding regions (CDSs).** Plots showing the relationship between genome size and (A) G+C content or (B) the number of CDSs. Points represent the 351 genomes determined in this study (red) and complete prokaryotic genomes collected from NCBI RefSeq (gray).
