# Supplementary material
Source: HighWire-hosted journal article supplement (doi:10.1101/gr.281026.125)
Supplement: Supplemental_Table_S1.xlsx [file Supplemental_Table_S1.xlsx]

## Sheet: TableS1
Supplemental Table S1. List of the 351 strains used in this study.
JCM number	Scientific name	Taxonomy (ICNP-based)	DNA from RIKEN-BRC, DNAbank / Culture from RIKEN-BRC, JCM	JCM medium number	Cultivation temperature (ºC)	Culture scale (mL or plate)	Cultivation time (days)	JCM catalog page URL	JGD ID	JGD catalog page URL	DNA conc. (ng/uL)
JCM 15760	Haloarcula argentinensis	Archaea; Methanobacteriati; Halobacteriota; Halobacteria; Halobacteriales; Haloarculaceae	Culture	168	37	100	4	https://www.jcm.riken.jp/cgi-bin/jcm/jcm_number?JCM=15760	N.A.	N.A.	778
JCM 17269	Halovenus rubra	Archaea; Methanobacteriati; Halobacteriota; Halobacteria; Halobacteriales; Haloarculaceae	Culture	574	37	100	4	https://www.jcm.riken.jp/cgi-bin/jcm/jcm_number?JCM=17269	N.A.	N.A.	510
JCM 19908	Halobacterium rubrum	Archaea; Methanobacteriati; Halobacteriota; Halobacteria; Halobacteriales; Halobacteriaceae	Culture	574	37	100	8	https://www.jcm.riken.jp/cgi-bin/jcm/jcm_number?JCM=19908	N.A.	N.A.	618
JCM 11890	Halalkalicoccus tibetensis	Archaea; Methanobacteriati; Halobacteriota; Halobacteria; Halobacteriales; Halococcaceae	Culture	306	37	100	16	https://www.jcm.riken.jp/cgi-bin/jcm/jcm_number?JCM=11890	N.A.	N.A.	49.4
JCM 30029	Halobium salinum	Archaea; Methanobacteriati; Halobacteriota; Halobacteria; Halobacteriales; Haloferacaceae	Culture	574	37	100	8	https://www.jcm.riken.jp/cgi-bin/jcm/jcm_number?JCM=30029	N.A.	N.A.	396
JCM 30237	Halolamina litorea	Archaea; Methanobacteriati; Halobacteriota; Halobacteria; Halobacteriales; Haloferacaceae	Culture	574	37	100	43	https://www.jcm.riken.jp/cgi-bin/jcm/jcm_number?JCM=30237	N.A.	N.A.	11.5
JCM 18549	Halolamina salina	Archaea; Methanobacteriati; Halobacteriota; Halobacteria; Halobacteriales; Haloferacaceae	Culture	574	37	100	13	https://www.jcm.riken.jp/cgi-bin/jcm/jcm_number?JCM=18549	N.A.	N.A.	1000
JCM 30442	Haloparvum alkalitolerans	Archaea; Methanobacteriati; Halobacteriota; Halobacteria; Halobacteriales; Haloferacaceae	Culture	1061	42	100	4	https://www.jcm.riken.jp/cgi-bin/jcm/jcm_number?JCM=30442	N.A.	N.A.	294
JCM 17506	Halopelagius fulvigenes	Archaea; Methanobacteriati; Halobacteriota; Halobacteria; Halobacteriales; Haloferacaceae	Culture	574	37	100	11	https://www.jcm.riken.jp/cgi-bin/jcm/jcm_number?JCM=17506	N.A.	N.A.	888
JCM 18641	Halopenitus salinus	Archaea; Methanobacteriati; Halobacteriota; Halobacteria; Halobacteriales; Haloferacaceae	Culture	574	37	100	8	https://www.jcm.riken.jp/cgi-bin/jcm/jcm_number?JCM=18641	N.A.	N.A.	1120
JCM 17092	Haloplanus litoreus	Archaea; Methanobacteriati; Halobacteriota; Halobacteria; Halobacteriales; Haloferacaceae	Culture	574	37	100	17	https://www.jcm.riken.jp/cgi-bin/jcm/jcm_number?JCM=17092	N.A.	N.A.	9.12
JCM 14265	Halorubrum ejinorense	Archaea; Methanobacteriati; Halobacteriota; Halobacteria; Halobacteriales; Haloferacaceae	Culture	168	37	100	4	https://www.jcm.riken.jp/cgi-bin/jcm/jcm_number?JCM=14265	N.A.	N.A.	980
JCM 17823	Halorubrum gandharaense	Archaea; Methanobacteriati; Halobacteriota; Halobacteria; Halobacteriales; Haloferacaceae	Culture	906	37	100	11	https://www.jcm.riken.jp/cgi-bin/jcm/jcm_number?JCM=17823	N.A.	N.A.	1620
JCM 18237	Halorubrum luteum	Archaea; Methanobacteriati; Halobacteriota; Halobacteria; Halobacteriales; Haloferacaceae	Culture	306	37	100	7	https://www.jcm.riken.jp/cgi-bin/jcm/jcm_number?JCM=18237	N.A.	N.A.	688
JCM 30955	Halorubrum pallidum	Archaea; Methanobacteriati; Halobacteriota; Halobacteria; Halobacteriales; Haloferacaceae	Culture	574	37	100	4	https://www.jcm.riken.jp/cgi-bin/jcm/jcm_number?JCM=30955	N.A.	N.A.	672
JCM 11889	Halorubrum tibetense	Archaea; Methanobacteriati; Halobacteriota; Halobacteria; Halobacteriales; Haloferacaceae	Culture	306	37	100	30	https://www.jcm.riken.jp/cgi-bin/jcm/jcm_number?JCM=11889	N.A.	N.A.	288
JCM 31271	Halorubrum trueperi	Archaea; Methanobacteriati; Halobacteriota; Halobacteria; Halobacteriales; Haloferacaceae	Culture	1007	37	100	7	https://www.jcm.riken.jp/cgi-bin/jcm/jcm_number?JCM=31271	N.A.	N.A.	338
JCM 30665	Halorubrum yunnanense	Archaea; Methanobacteriati; Halobacteriota; Halobacteria; Halobacteriales; Haloferacaceae	Culture	307	37	100	5	https://www.jcm.riken.jp/cgi-bin/jcm/jcm_number?JCM=30665	N.A.	N.A.	636
JCM 18642	Haloarchaeobius amylolyticus	Archaea; Methanobacteriati; Halobacteriota; Halobacteria; Halobacteriales; Halorubellaceae	Culture	574	37	100	4	https://www.jcm.riken.jp/cgi-bin/jcm/jcm_number?JCM=18642	N.A.	N.A.	1280
JCM 17117	Halorubellus litoreus	Archaea; Methanobacteriati; Halobacteriota; Halobacteria; Halobacteriales; Halorubellaceae	Culture	574	37	100	4	https://www.jcm.riken.jp/cgi-bin/jcm/jcm_number?JCM=17117	N.A.	N.A.	590
JCM 19583	Halopiger thermotolerans	Archaea; Methanobacteriati; Halobacteriota; Halobacteria; Halobacteriales; Natrialbaceae	Culture	1007	45	100	11	https://www.jcm.riken.jp/cgi-bin/jcm/jcm_number?JCM=19583	N.A.	N.A.	766
JCM 16592	Halostagnicola alkaliphila	Archaea; Methanobacteriati; Halobacteriota; Halobacteria; Halobacteriales; Natrialbaceae	Culture	306	37	100	11	https://www.jcm.riken.jp/cgi-bin/jcm/jcm_number?JCM=16592	N.A.	N.A.	314
JCM 18750	Halostagnicola bangensis	Archaea; Methanobacteriati; Halobacteriota; Halobacteria; Halobacteriales; Natrialbaceae	Culture	306	37	100	7	https://www.jcm.riken.jp/cgi-bin/jcm/jcm_number?JCM=18750	N.A.	N.A.	780
JCM 9743	Natrinema sp.	Archaea; Methanobacteriati; Halobacteriota; Halobacteria; Halobacteriales; Natrialbaceae	DNA	N.A.	N.A.	N.A.	N.A.	https://www.jcm.riken.jp/cgi-bin/jcm/jcm_number?JCM=9743	JGD07558	https://dna.brc.riken.jp/DataSheet/JGD07558	19.7
JCM 31939	Natronobiforma cellulositropha	Archaea; Methanobacteriati; Halobacteriota; Halobacteria; Halobacteriales; Natrialbaceae	Culture	1180	20	100	47	https://www.jcm.riken.jp/cgi-bin/jcm/jcm_number?JCM=31939	N.A.	N.A.	570
JCM 16328	Natronoarchaeum mannanilyticum	Archaea; Methanobacteriati; Halobacteriota; Halobacteria; Halobacteriales; Natronoarchaeaceae	Culture	788	37	100	14	https://www.jcm.riken.jp/cgi-bin/jcm/jcm_number?JCM=16328	N.A.	N.A.	117
JCM 19597	Salinarchaeum chitinilyticum	Archaea; Methanobacteriati; Halobacteriota; Halobacteria; Halobacteriales; Natronoarchaeaceae	Culture	574	37	100	35	https://www.jcm.riken.jp/cgi-bin/jcm/jcm_number?JCM=19597	N.A.	N.A.	78.2
JCM 15416	Methanobacterium flexile	Archaea; Methanobacteriati; Methanobacteriota; Methanobacteria; Methanobacteriales; Methanobacteriaceae	Culture	242	37	100	8	https://www.jcm.riken.jp/cgi-bin/jcm/jcm_number?JCM=15416	N.A.	N.A.	95.8
JCM 15797	Methanobacterium kanagiense	Archaea; Methanobacteriati; Methanobacteriota; Methanobacteria; Methanobacteriales; Methanobacteriaceae	Culture	198	40	100	12	https://www.jcm.riken.jp/cgi-bin/jcm/jcm_number?JCM=15797	N.A.	N.A.	61
JCM 15415	Methanobacterium movens	Archaea; Methanobacteriati; Methanobacteriota; Methanobacteria; Methanobacteriales; Methanobacteriaceae	Culture	198	37	500	62	https://www.jcm.riken.jp/cgi-bin/jcm/jcm_number?JCM=15415	N.A.	N.A.	66.6
JCM 18470	Methanobacterium movilense	Archaea; Methanobacteriati; Methanobacteriota; Methanobacteria; Methanobacteriales; Methanobacteriaceae	Culture	945	28	100	28	https://www.jcm.riken.jp/cgi-bin/jcm/jcm_number?JCM=18470	N.A.	N.A.	50.8
JCM 10723	Methanothermus sociabilis	Archaea; Methanobacteriati; Methanobacteriota; Methanobacteria; Methanobacteriales; Methanothermaceae	Culture	251	85	100	2	https://www.jcm.riken.jp/cgi-bin/jcm/jcm_number?JCM=10723	N.A.	N.A.	65.6
JCM 17393	Methanothermobacter crinale	Archaea; Methanobacteriati; Methanobacteriota; Methanobacteria; Methanobacteriales; Methanothermobacteraceae	Culture	872	65	100	6	https://www.jcm.riken.jp/cgi-bin/jcm/jcm_number?JCM=17393	N.A.	N.A.	99.4
JCM 11886	Methanocaldococcus indicus	Archaea; Methanobacteriati; Methanobacteriota; Methanococci; Methanococcales; Methanocaldococcaceae	Culture	232	80	100	3	https://www.jcm.riken.jp/cgi-bin/jcm/jcm_number?JCM=11886	N.A.	N.A.	62.6
JCM 10627	Methanocalculus pumilus	Archaea; Methanobacteriati; Methanobacteriota; Methanomicrobia; Methanomicrobiales; Methanocalculaceae	Culture	272	35	100	4	https://www.jcm.riken.jp/cgi-bin/jcm/jcm_number?JCM=10627	N.A.	N.A.	43
JCM 10550	Methanogenium cariaci	Archaea; Methanobacteriati; Methanobacteriota; Methanomicrobia; Methanomicrobiales; Methanomicrobiaceae	DNA	N.A.	N.A.	N.A.	N.A.	https://www.jcm.riken.jp/cgi-bin/jcm/jcm_number?JCM=10550	JGD12569	https://dna.brc.riken.jp/DataSheet/JGD12569	139
JCM 11281	Methanosarcina baltica	Archaea; Methanobacteriati; Methanobacteriota; Methanomicrobia; Methanosarcinales; Methanosarcinaceae	Culture	305	25	100	8	https://www.jcm.riken.jp/cgi-bin/jcm/jcm_number?JCM=11281	N.A.	N.A.	64.4
JCM 15540	Methanosarcina subterranea	Archaea; Methanobacteriati; Methanobacteriota; Methanomicrobia; Methanosarcinales; Methanosarcinaceae	Culture	1110	35	1000	11	https://www.jcm.riken.jp/cgi-bin/jcm/jcm_number?JCM=15540	N.A.	N.A.	45
JCM 13384	Palaeococcus helgesonii	Archaea; Methanobacteriati; Methanobacteriota; Thermococci; Thermococcales; Thermococcaceae	Culture	280	80	100	1	https://www.jcm.riken.jp/cgi-bin/jcm/jcm_number?JCM=13384	N.A.	N.A.	74.8
JCM 8421	Pyrococcus woesei	Archaea; Methanobacteriati; Methanobacteriota; Thermococci; Thermococcales; Thermococcaceae	Culture	151	95	100	1	https://www.jcm.riken.jp/cgi-bin/jcm/jcm_number?JCM=8421	N.A.	N.A.	68.6
JCM 10828	Thermococcus aegaeus	Archaea; Methanobacteriati; Methanobacteriota; Thermococci; Thermococcales; Thermococcaceae	Culture	280	90	1000	2	https://www.jcm.riken.jp/cgi-bin/jcm/jcm_number?JCM=10828	N.A.	N.A.	330
JCM 16138	Thermococcus atlanticus	Archaea; Methanobacteriati; Methanobacteriota; Thermococci; Thermococcales; Thermococcaceae	Culture	280	85	100	1	https://www.jcm.riken.jp/cgi-bin/jcm/jcm_number?JCM=16138	N.A.	N.A.	47.4
JCM 12540	Thermococcus coalescens	Archaea; Methanobacteriati; Methanobacteriota; Thermococci; Thermococcales; Thermococcaceae	Culture	280	85	100	1	https://www.jcm.riken.jp/cgi-bin/jcm/jcm_number?JCM=12540	N.A.	N.A.	90.6
JCM 10128	Thermococcus fumicolans	Archaea; Methanobacteriati; Methanobacteriota; Thermococci; Thermococcales; Thermococcaceae	Culture	280	85	100	1	https://www.jcm.riken.jp/cgi-bin/jcm/jcm_number?JCM=10128	N.A.	N.A.	65.8
JCM 11825	Thermococcus marinus	Archaea; Methanobacteriati; Methanobacteriota; Thermococci; Thermococcales; Thermococcaceae	Culture	350	85	100	1	https://www.jcm.riken.jp/cgi-bin/jcm/jcm_number?JCM=11825	N.A.	N.A.	62.2
JCM 16307	Thermococcus prieurii	Archaea; Methanobacteriati; Methanobacteriota; Thermococci; Thermococcales; Thermococcaceae	Culture	280	80	100	1	https://www.jcm.riken.jp/cgi-bin/jcm/jcm_number?JCM=16307	N.A.	N.A.	44.4
JCM 11816	Thermococcus sp.	Archaea; Methanobacteriati; Methanobacteriota; Thermococci; Thermococcales; Thermococcaceae	DNA	N.A.	N.A.	N.A.	N.A.	https://www.jcm.riken.jp/cgi-bin/jcm/jcm_number?JCM=11816	JGD12607	https://dna.brc.riken.jp/DataSheet/JGD12607	77.6
JCM 10985	Thermococcus waiotapuensis	Archaea; Methanobacteriati; Methanobacteriota; Thermococci; Thermococcales; Thermococcaceae	Culture	287	80	100	1	https://www.jcm.riken.jp/cgi-bin/jcm/jcm_number?JCM=10985	N.A.	N.A.	110
JCM 13583	Thermogymnomonas acidicola	Archaea; Methanobacteriati; Thermoplasmatota; Thermoplasmata; Thermoplasmatales	DNA	N.A.	N.A.	N.A.	N.A.	https://www.jcm.riken.jp/cgi-bin/jcm/jcm_number?JCM=13583	JGD12591	https://dna.brc.riken.jp/DataSheet/JGD12591	462
JCM 11320	Acidilobus aceticus	Archaea; Thermoproteati; Thermoproteota; Thermoprotei; Acidilobales; Acidilobaceae	Culture	308	80	1000	9	https://www.jcm.riken.jp/cgi-bin/jcm/jcm_number?JCM=11320	N.A.	N.A.	62
JCM 13516	Caldococcus noboribetus	Archaea; Thermoproteati; Thermoproteota; Thermoprotei; Desulfurococcales	Culture	513	85	100	10	https://www.jcm.riken.jp/cgi-bin/jcm/jcm_number?JCM=13516	N.A.	N.A.	18.8
JCM 10135	Stetteria hydrogenophila	Archaea; Thermoproteati; Thermoproteota; Thermoprotei; Desulfurococcales; Desulfurococcaceae	Culture	244	95	100	4	https://www.jcm.riken.jp/cgi-bin/jcm/jcm_number?JCM=10135	N.A.	N.A.	59
JCM 10309	Sulfophobococcus zilligii	Archaea; Thermoproteati; Thermoproteota; Thermoprotei; Desulfurococcales; Desulfurococcaceae	Culture	252	85	100	5	https://www.jcm.riken.jp/cgi-bin/jcm/jcm_number?JCM=10309	N.A.	N.A.	20.4
JCM 11597	Thermodiscus maritimus	Archaea; Thermoproteati; Thermoproteota; Thermoprotei; Desulfurococcales; Desulfurococcaceae	Culture	347	90	1000	3	https://www.jcm.riken.jp/cgi-bin/jcm/jcm_number?JCM=11597	N.A.	N.A.	18.2
JCM 9392	Pyrodictium brockii	Archaea; Thermoproteati; Thermoproteota; Thermoprotei; Desulfurococcales; Pyrodictiaceae	Culture	203	95	1000	3	https://www.jcm.riken.jp/cgi-bin/jcm/jcm_number?JCM=9392	N.A.	N.A.	4.3
JCM 10088	Thermocladium modestius	Archaea; Thermoproteati; Thermoproteota; Thermoprotei; Thermoproteales; Thermocladiaceae	DNA	N.A.	N.A.	N.A.	N.A.	https://www.jcm.riken.jp/cgi-bin/jcm/jcm_number?JCM=10088	JGD08742	https://dna.brc.riken.jp/DataSheet/JGD08742	66
JCM 9190	Pyrobaculum organotrophum	Archaea; Thermoproteati; Thermoproteota; Thermoprotei; Thermoproteales; Thermoproteaceae	Culture	184	95	1000	7	https://www.jcm.riken.jp/cgi-bin/jcm/jcm_number?JCM=9190	N.A.	N.A.	36.2
JCM 17229	Thermoproteus thermophilus	Archaea; Thermoproteati; Thermoproteota; Thermoprotei; Thermoproteales; Thermoproteaceae	Culture	236	85	1000	4	https://www.jcm.riken.jp/cgi-bin/jcm/jcm_number?JCM=17229	N.A.	N.A.	162
JCM 14467	Vulcanisaeta sp.	Archaea; Thermoproteati; Thermoproteota; Thermoprotei; Thermoproteales; Thermoproteaceae	DNA	N.A.	N.A.	N.A.	N.A.	https://www.jcm.riken.jp/cgi-bin/jcm/jcm_number?JCM=14467	JGD12609	https://dna.brc.riken.jp/DataSheet/JGD12609	58.2
JCM 16159	Vulcanisaeta sp.	Archaea; Thermoproteati; Thermoproteota; Thermoprotei; Thermoproteales; Thermoproteaceae	Culture	297	85	100	8	https://www.jcm.riken.jp/cgi-bin/jcm/jcm_number?JCM=16159	N.A.	N.A.	272
JCM 16161	Vulcanisaeta sp.	Archaea; Thermoproteati; Thermoproteota; Thermoprotei; Thermoproteales; Thermoproteaceae	DNA	N.A.	N.A.	N.A.	N.A.	https://www.jcm.riken.jp/cgi-bin/jcm/jcm_number?JCM=16161	JGD12611	https://dna.brc.riken.jp/DataSheet/JGD12611	63.8
JCM 1254	Bifidobacterium bifidum	Bacteria; Bacillati; Actinomycetota; Actinomycetes; Bifidobacteriales; Bifidobacteriaceae	DNA	N.A.	N.A.	N.A.	N.A.	https://www.jcm.riken.jp/cgi-bin/jcm/jcm_number?JCM=1254	JGD08546	https://dna.brc.riken.jp/DataSheet/JGD08546	91.8
JCM 1272	Bifidobacterium longum subsp. infantis	Bacteria; Bacillati; Actinomycetota; Actinomycetes; Bifidobacteriales; Bifidobacteriaceae	DNA	N.A.	N.A.	N.A.	N.A.	https://www.jcm.riken.jp/cgi-bin/jcm/jcm_number?JCM=1272	JGD08547	https://dna.brc.riken.jp/DataSheet/JGD08547	59.4
JCM 9957	Kineosporia succinea	Bacteria; Bacillati; Actinomycetota; Actinomycetes; Kineosporiales; Kineosporiaceae	DNA	N.A.	N.A.	N.A.	N.A.	https://www.jcm.riken.jp/cgi-bin/jcm/jcm_number?JCM=9957	JGD12732	https://dna.brc.riken.jp/DataSheet/JGD12732	50.8
JCM 13580	Streptomyces drozdowiczii	Bacteria; Bacillati; Actinomycetota; Actinomycetes; Kitasatosporales; Streptomycetaceae	DNA	N.A.	N.A.	N.A.	N.A.	https://www.jcm.riken.jp/cgi-bin/jcm/jcm_number?JCM=13580	JGD12670	https://dna.brc.riken.jp/DataSheet/JGD12670	144
JCM 12681	Streptomyces mexicanus	Bacteria; Bacillati; Actinomycetota; Actinomycetes; Kitasatosporales; Streptomycetaceae	DNA	N.A.	N.A.	N.A.	N.A.	https://www.jcm.riken.jp/cgi-bin/jcm/jcm_number?JCM=12681	JGD12695	https://dna.brc.riken.jp/DataSheet/JGD12695	196
JCM 4814	Streptomyces phaeofaciens	Bacteria; Bacillati; Actinomycetota; Actinomycetes; Kitasatosporales; Streptomycetaceae	DNA	N.A.	N.A.	N.A.	N.A.	https://www.jcm.riken.jp/cgi-bin/jcm/jcm_number?JCM=4814	JGD12723	https://dna.brc.riken.jp/DataSheet/JGD12723	75.8
JCM 4914	Streptomyces platensis subsp. malvinus	Bacteria; Bacillati; Actinomycetota; Actinomycetes; Kitasatosporales; Streptomycetaceae	DNA	N.A.	N.A.	N.A.	N.A.	https://www.jcm.riken.jp/cgi-bin/jcm/jcm_number?JCM=4914	JGD08516	https://dna.brc.riken.jp/DataSheet/JGD08516	62.4
JCM 18897	Streptomyces sp.	Bacteria; Bacillati; Actinomycetota; Actinomycetes; Kitasatosporales; Streptomycetaceae	DNA	N.A.	N.A.	N.A.	N.A.	https://www.jcm.riken.jp/cgi-bin/jcm/jcm_number?JCM=18897	JGD12649	https://dna.brc.riken.jp/DataSheet/JGD12649	164
JCM 18882	Brevibacterium metallidurans	Bacteria; Bacillati; Actinomycetota; Actinomycetes; Micrococcales; Brevibacteriaceae	DNA	N.A.	N.A.	N.A.	N.A.	https://www.jcm.riken.jp/cgi-bin/jcm/jcm_number?JCM=18882	JGD12667	https://dna.brc.riken.jp/DataSheet/JGD12667	19.9
JCM 16927	Cellulomonas chitinilytica	Bacteria; Bacillati; Actinomycetota; Actinomycetes; Micrococcales; Cellulomonadaceae	DNA	N.A.	N.A.	N.A.	N.A.	https://www.jcm.riken.jp/cgi-bin/jcm/jcm_number?JCM=16927	JGD12710	https://dna.brc.riken.jp/DataSheet/JGD12710	93.8
JCM 18110	Cellulomonas iranensis	Bacteria; Bacillati; Actinomycetota; Actinomycetes; Micrococcales; Cellulomonadaceae	DNA	N.A.	N.A.	N.A.	N.A.	https://www.jcm.riken.jp/cgi-bin/jcm/jcm_number?JCM=18110	JGD12711	https://dna.brc.riken.jp/DataSheet/JGD12711	350
JCM 18755	Cellulomonas pakistanensis	Bacteria; Bacillati; Actinomycetota; Actinomycetes; Micrococcales; Cellulomonadaceae	DNA	N.A.	N.A.	N.A.	N.A.	https://www.jcm.riken.jp/cgi-bin/jcm/jcm_number?JCM=18755	JGD12714	https://dna.brc.riken.jp/DataSheet/JGD12714	149
JCM 18111	Cellulomonas persica	Bacteria; Bacillati; Actinomycetota; Actinomycetes; Micrococcales; Cellulomonadaceae	DNA	N.A.	N.A.	N.A.	N.A.	https://www.jcm.riken.jp/cgi-bin/jcm/jcm_number?JCM=18111	JGD12712	https://dna.brc.riken.jp/DataSheet/JGD12712	143
JCM 9808	Cellulomonas sp.	Bacteria; Bacillati; Actinomycetota; Actinomycetes; Micrococcales; Cellulomonadaceae	DNA	N.A.	N.A.	N.A.	N.A.	https://www.jcm.riken.jp/cgi-bin/jcm/jcm_number?JCM=9808	JGD12641	https://dna.brc.riken.jp/DataSheet/JGD12641	218
JCM 15471	Brachybacterium zhongshanense	Bacteria; Bacillati; Actinomycetota; Actinomycetes; Micrococcales; Dermabacteraceae	DNA	N.A.	N.A.	N.A.	N.A.	https://www.jcm.riken.jp/cgi-bin/jcm/jcm_number?JCM=15471	JGD12704	https://dna.brc.riken.jp/DataSheet/JGD12704	151
JCM 13591	Microbacterium xylanilyticum	Bacteria; Bacillati; Actinomycetota; Actinomycetes; Micrococcales; Microbacteriaceae	DNA	N.A.	N.A.	N.A.	N.A.	https://www.jcm.riken.jp/cgi-bin/jcm/jcm_number?JCM=13591	JGD12671	https://dna.brc.riken.jp/DataSheet/JGD12671	238
JCM 14115	Paenarthrobacter nitroguajacolicus	Bacteria; Bacillati; Actinomycetota; Actinomycetes; Micrococcales; Micrococcaceae	DNA	N.A.	N.A.	N.A.	N.A.	https://www.jcm.riken.jp/cgi-bin/jcm/jcm_number?JCM=14115	JGD12672	https://dna.brc.riken.jp/DataSheet/JGD12672	91.6
JCM 11754	Isoptericola variabilis	Bacteria; Bacillati; Actinomycetota; Actinomycetes; Micrococcales; Promicromonosporaceae	DNA	N.A.	N.A.	N.A.	N.A.	https://www.jcm.riken.jp/cgi-bin/jcm/jcm_number?JCM=11754	JGD12691	https://dna.brc.riken.jp/DataSheet/JGD12691	94.8
JCM 9534	Catenuloplanes indicus	Bacteria; Bacillati; Actinomycetota; Actinomycetes; Micromonosporales; Micromonosporaceae	DNA	N.A.	N.A.	N.A.	N.A.	https://www.jcm.riken.jp/cgi-bin/jcm/jcm_number?JCM=9534	JGD12727	https://dna.brc.riken.jp/DataSheet/JGD12727	80.4
JCM 9533	Catenuloplanes niger	Bacteria; Bacillati; Actinomycetota; Actinomycetes; Micromonosporales; Micromonosporaceae	DNA	N.A.	N.A.	N.A.	N.A.	https://www.jcm.riken.jp/cgi-bin/jcm/jcm_number?JCM=9533	JGD12726	https://dna.brc.riken.jp/DataSheet/JGD12726	802
JCM 7447	Corynebacterium amycolatum	Bacteria; Bacillati; Actinomycetota; Actinomycetes; Mycobacteriales; Corynebacteriaceae	DNA	N.A.	N.A.	N.A.	N.A.	https://www.jcm.riken.jp/cgi-bin/jcm/jcm_number?JCM=7447	JGD18615	https://dna.brc.riken.jp/DataSheet/JGD18615	166
JCM 12107	Corynebacterium simulans	Bacteria; Bacillati; Actinomycetota; Actinomycetes; Mycobacteriales; Corynebacteriaceae	DNA	N.A.	N.A.	N.A.	N.A.	https://www.jcm.riken.jp/cgi-bin/jcm/jcm_number?JCM=12107	JGD18612	https://dna.brc.riken.jp/DataSheet/JGD18612	222
JCM 15430	Mycobacterium avium	Bacteria; Bacillati; Actinomycetota; Actinomycetes; Mycobacteriales; Mycobacteriaceae	DNA	N.A.	N.A.	N.A.	N.A.	https://www.jcm.riken.jp/cgi-bin/jcm/jcm_number?JCM=15430	JGD07447	https://dna.brc.riken.jp/DataSheet/JGD07447	588
JCM 16369	Mycolicibacterium crocinum	Bacteria; Bacillati; Actinomycetota; Actinomycetes; Mycobacteriales; Mycobacteriaceae	DNA	N.A.	N.A.	N.A.	N.A.	https://www.jcm.riken.jp/cgi-bin/jcm/jcm_number?JCM=16369	JGD12707	https://dna.brc.riken.jp/DataSheet/JGD12707	71.6
JCM 12141	Mycolicibacterium hodleri	Bacteria; Bacillati; Actinomycetota; Actinomycetes; Mycobacteriales; Mycobacteriaceae	DNA	N.A.	N.A.	N.A.	N.A.	https://www.jcm.riken.jp/cgi-bin/jcm/jcm_number?JCM=12141	JGD12693	https://dna.brc.riken.jp/DataSheet/JGD12693	196
JCM 16370	Mycolicibacterium pallens	Bacteria; Bacillati; Actinomycetota; Actinomycetes; Mycobacteriales; Mycobacteriaceae	DNA	N.A.	N.A.	N.A.	N.A.	https://www.jcm.riken.jp/cgi-bin/jcm/jcm_number?JCM=16370	JGD12708	https://dna.brc.riken.jp/DataSheet/JGD12708	87.4
JCM 15927	Mycolicibacterium pyrenivorans	Bacteria; Bacillati; Actinomycetota; Actinomycetes; Mycobacteriales; Mycobacteriaceae	DNA	N.A.	N.A.	N.A.	N.A.	https://www.jcm.riken.jp/cgi-bin/jcm/jcm_number?JCM=15927	JGD12705	https://dna.brc.riken.jp/DataSheet/JGD12705	108
JCM 9803	Rhodococcus erythropolis	Bacteria; Bacillati; Actinomycetota; Actinomycetes; Mycobacteriales; Nocardiaceae	DNA	N.A.	N.A.	N.A.	N.A.	https://www.jcm.riken.jp/cgi-bin/jcm/jcm_number?JCM=9803	JGD12643	https://dna.brc.riken.jp/DataSheet/JGD12643	150
JCM 9804	Rhodococcus erythropolis	Bacteria; Bacillati; Actinomycetota; Actinomycetes; Mycobacteriales; Nocardiaceae	DNA	N.A.	N.A.	N.A.	N.A.	https://www.jcm.riken.jp/cgi-bin/jcm/jcm_number?JCM=9804	JGD12631	https://dna.brc.riken.jp/DataSheet/JGD12631	62.2
JCM 9805	Rhodococcus erythropolis	Bacteria; Bacillati; Actinomycetota; Actinomycetes; Mycobacteriales; Nocardiaceae	DNA	N.A.	N.A.	N.A.	N.A.	https://www.jcm.riken.jp/cgi-bin/jcm/jcm_number?JCM=9805	JGD12644	https://dna.brc.riken.jp/DataSheet/JGD12644	151
JCM 9791	Rhodococcus sp.	Bacteria; Bacillati; Actinomycetota; Actinomycetes; Mycobacteriales; Nocardiaceae	DNA	N.A.	N.A.	N.A.	N.A.	https://www.jcm.riken.jp/cgi-bin/jcm/jcm_number?JCM=9791	JGD12639	https://dna.brc.riken.jp/DataSheet/JGD12639	131
JCM 9793	Rhodococcus sp.	Bacteria; Bacillati; Actinomycetota; Actinomycetes; Mycobacteriales; Nocardiaceae	DNA	N.A.	N.A.	N.A.	N.A.	https://www.jcm.riken.jp/cgi-bin/jcm/jcm_number?JCM=9793	JGD12640	https://dna.brc.riken.jp/DataSheet/JGD12640	300
JCM 10703	Nocardioides nitrophenolicus	Bacteria; Bacillati; Actinomycetota; Actinomycetes; Propionibacteriales; Nocardioidaceae	DNA	N.A.	N.A.	N.A.	N.A.	https://www.jcm.riken.jp/cgi-bin/jcm/jcm_number?JCM=10703	JGD12684	https://dna.brc.riken.jp/DataSheet/JGD12684	137
JCM 10369	Nocardioides pyridinolyticus	Bacteria; Bacillati; Actinomycetota; Actinomycetes; Propionibacteriales; Nocardioidaceae	DNA	N.A.	N.A.	N.A.	N.A.	https://www.jcm.riken.jp/cgi-bin/jcm/jcm_number?JCM=10369	JGD12699	https://dna.brc.riken.jp/DataSheet/JGD12699	52.8
JCM 16518	Nocardioides sp.	Bacteria; Bacillati; Actinomycetota; Actinomycetes; Propionibacteriales; Nocardioidaceae	DNA	N.A.	N.A.	N.A.	N.A.	https://www.jcm.riken.jp/cgi-bin/jcm/jcm_number?JCM=16518	JGD12642	https://dna.brc.riken.jp/DataSheet/JGD12642	194
JCM 18899	Nocardioides sp.	Bacteria; Bacillati; Actinomycetota; Actinomycetes; Propionibacteriales; Nocardioidaceae	DNA	N.A.	N.A.	N.A.	N.A.	https://www.jcm.riken.jp/cgi-bin/jcm/jcm_number?JCM=18899	JGD12650	https://dna.brc.riken.jp/DataSheet/JGD12650	40.8
JCM 18998	Nocardioides sp.	Bacteria; Bacillati; Actinomycetota; Actinomycetes; Propionibacteriales; Nocardioidaceae	DNA	N.A.	N.A.	N.A.	N.A.	https://www.jcm.riken.jp/cgi-bin/jcm/jcm_number?JCM=18998	JGD12651	https://dna.brc.riken.jp/DataSheet/JGD12651	95.8
JCM 18999	Nocardioides sp.	Bacteria; Bacillati; Actinomycetota; Actinomycetes; Propionibacteriales; Nocardioidaceae	DNA	N.A.	N.A.	N.A.	N.A.	https://www.jcm.riken.jp/cgi-bin/jcm/jcm_number?JCM=18999	JGD12653	https://dna.brc.riken.jp/DataSheet/JGD12653	95.4
JCM 18916	Cutibacterium acnes subsp. acnes	Bacteria; Bacillati; Actinomycetota; Actinomycetes; Propionibacteriales; Propionibacteriaceae	DNA	N.A.	N.A.	N.A.	N.A.	https://www.jcm.riken.jp/cgi-bin/jcm/jcm_number?JCM=18916	JGD12657	https://dna.brc.riken.jp/DataSheet/JGD12657	81
JCM 18909	Cutibacterium acnes subsp. elongatum	Bacteria; Bacillati; Actinomycetota; Actinomycetes; Propionibacteriales; Propionibacteriaceae	DNA	N.A.	N.A.	N.A.	N.A.	https://www.jcm.riken.jp/cgi-bin/jcm/jcm_number?JCM=18909	JGD12656	https://dna.brc.riken.jp/DataSheet/JGD12656	15.3
JCM 3263	Thermobifida fusca	Bacteria; Bacillati; Actinomycetota; Actinomycetes; Streptosporangiales; Nocardiopsidaceae	DNA	N.A.	N.A.	N.A.	N.A.	https://www.jcm.riken.jp/cgi-bin/jcm/jcm_number?JCM=3263	JGD07551	https://dna.brc.riken.jp/DataSheet/JGD07551	24.6
JCM 18997	Conexibacter sp.	Bacteria; Bacillati; Actinomycetota; Thermoleophilia; Solirubrobacterales; Conexibacteraceae	DNA	N.A.	N.A.	N.A.	N.A.	https://www.jcm.riken.jp/cgi-bin/jcm/jcm_number?JCM=18997	JGD12652	https://dna.brc.riken.jp/DataSheet/JGD12652	84.2
JCM 14450	Geobacillus stearothermophilus	Bacteria; Bacillati; Bacillota; Bacilli; Bacillales; Anoxybacillaceae	DNA	N.A.	N.A.	N.A.	N.A.	https://www.jcm.riken.jp/cgi-bin/jcm/jcm_number?JCM=14450	JGD07087	https://dna.brc.riken.jp/DataSheet/JGD07087	194
JCM 20266	Bacillus cereus	Bacteria; Bacillati; Bacillota; Bacilli; Bacillales; Bacillaceae	DNA	N.A.	N.A.	N.A.	N.A.	https://www.jcm.riken.jp/cgi-bin/jcm/jcm_number?JCM=20266	JGD07091	https://dna.brc.riken.jp/DataSheet/JGD07091	193
JCM 10596	Caldalkalibacillus mannanilyticus	Bacteria; Bacillati; Bacillota; Bacilli; Bacillales; Bacillaceae	DNA	N.A.	N.A.	N.A.	N.A.	https://www.jcm.riken.jp/cgi-bin/jcm/jcm_number?JCM=10596	JGD12501	https://dna.brc.riken.jp/DataSheet/JGD12501	14
JCM 21714	Gracilibacillus boraciitolerans	Bacteria; Bacillati; Bacillota; Bacilli; Bacillales; Bacillaceae	DNA	N.A.	N.A.	N.A.	N.A.	https://www.jcm.riken.jp/cgi-bin/jcm/jcm_number?JCM=21714	JGD12623	https://dna.brc.riken.jp/DataSheet/JGD12623	147
JCM 18860	Gracilibacillus pakistanensis	Bacteria; Bacillati; Bacillota; Bacilli; Bacillales; Bacillaceae	DNA	N.A.	N.A.	N.A.	N.A.	https://www.jcm.riken.jp/cgi-bin/jcm/jcm_number?JCM=18860	JGD12622	https://dna.brc.riken.jp/DataSheet/JGD12622	162
JCM 18966	Gracilibacillus sp.	Bacteria; Bacillati; Bacillota; Bacilli; Bacillales; Bacillaceae	DNA	N.A.	N.A.	N.A.	N.A.	https://www.jcm.riken.jp/cgi-bin/jcm/jcm_number?JCM=18966	JGD12660	https://dna.brc.riken.jp/DataSheet/JGD12660	132
JCM 9157	Halalkalibacter akibai	Bacteria; Bacillati; Bacillota; Bacilli; Bacillales; Bacillaceae	DNA	N.A.	N.A.	N.A.	N.A.	https://www.jcm.riken.jp/cgi-bin/jcm/jcm_number?JCM=9157	JGD12519	https://dna.brc.riken.jp/DataSheet/JGD12519	44.2
JCM 9140	Halalkalibacter wakoensis	Bacteria; Bacillati; Bacillota; Bacilli; Bacillales; Bacillaceae	DNA	N.A.	N.A.	N.A.	N.A.	https://www.jcm.riken.jp/cgi-bin/jcm/jcm_number?JCM=9140	JGD12516	https://dna.brc.riken.jp/DataSheet/JGD12516	109
JCM 12149	Lentibacillus halophilus	Bacteria; Bacillati; Bacillota; Bacilli; Bacillales; Bacillaceae	Culture	168	37	100	7	https://www.jcm.riken.jp/cgi-bin/jcm/jcm_number?JCM=12149	N.A.	N.A.	42.6
JCM 30234	Lentibacillus kimchii	Bacteria; Bacillati; Bacillota; Bacilli; Bacillales; Bacillaceae	Culture	168	30	100	12	https://www.jcm.riken.jp/cgi-bin/jcm/jcm_number?JCM=30234	N.A.	N.A.	197
JCM 18776	Lysinibacillus pakistanensis	Bacteria; Bacillati; Bacillota; Bacilli; Bacillales; Bacillaceae	DNA	N.A.	N.A.	N.A.	N.A.	https://www.jcm.riken.jp/cgi-bin/jcm/jcm_number?JCM=18776	JGD12576	https://dna.brc.riken.jp/DataSheet/JGD12576	124
JCM 12389	Salinibacillus aidingensis	Bacteria; Bacillati; Bacillota; Bacilli; Bacillales; Bacillaceae	Culture	377	37	100	4	https://www.jcm.riken.jp/cgi-bin/jcm/jcm_number?JCM=12389	N.A.	N.A.	191
JCM 30907	Virgibacillus ainsalahensis	Bacteria; Bacillati; Bacillota; Bacilli; Bacillales; Bacillaceae	Culture	1105	30	100	3	https://www.jcm.riken.jp/cgi-bin/jcm/jcm_number?JCM=30907	N.A.	N.A.	338
JCM 32284	Virgibacillus kimchii	Bacteria; Bacillati; Bacillota; Bacilli; Bacillales; Bacillaceae	Culture	377	37	100	4	https://www.jcm.riken.jp/cgi-bin/jcm/jcm_number?JCM=32284	N.A.	N.A.	328
JCM 15395	Virgibacillus siamensis	Bacteria; Bacillati; Bacillota; Bacilli; Bacillales; Bacillaceae	Culture	377	37	100	6	https://www.jcm.riken.jp/cgi-bin/jcm/jcm_number?JCM=15395	N.A.	N.A.	474
JCM 7671	Listeria monocytogenes	Bacteria; Bacillati; Bacillota; Bacilli; Bacillales; Listeriaceae	DNA	N.A.	N.A.	N.A.	N.A.	https://www.jcm.riken.jp/cgi-bin/jcm/jcm_number?JCM=7671	JGD14629	https://dna.brc.riken.jp/DataSheet/JGD14629	20.2
JCM 16418	Paenibacillus pini	Bacteria; Bacillati; Bacillota; Bacilli; Bacillales; Paenibacillaceae	DNA	N.A.	N.A.	N.A.	N.A.	https://www.jcm.riken.jp/cgi-bin/jcm/jcm_number?JCM=16418	JGD12522	https://dna.brc.riken.jp/DataSheet/JGD12522	18.9
JCM 10914	Paenibacillus sp.	Bacteria; Bacillati; Bacillota; Bacilli; Bacillales; Paenibacillaceae	DNA	N.A.	N.A.	N.A.	N.A.	https://www.jcm.riken.jp/cgi-bin/jcm/jcm_number?JCM=10914	JGD12520	https://dna.brc.riken.jp/DataSheet/JGD12520	94.4
JCM 16163	Paenibacillus sp.	Bacteria; Bacillati; Bacillota; Bacilli; Bacillales; Paenibacillaceae	DNA	N.A.	N.A.	N.A.	N.A.	https://www.jcm.riken.jp/cgi-bin/jcm/jcm_number?JCM=16163	JGD12628	https://dna.brc.riken.jp/DataSheet/JGD12628	38.2
JCM 18996	Paenibacillus sp.	Bacteria; Bacillati; Bacillota; Bacilli; Bacillales; Paenibacillaceae	DNA	N.A.	N.A.	N.A.	N.A.	https://www.jcm.riken.jp/cgi-bin/jcm/jcm_number?JCM=18996	JGD12655	https://dna.brc.riken.jp/DataSheet/JGD12655	82.6
JCM 9795	Paenibacillus sp.	Bacteria; Bacillati; Bacillota; Bacilli; Bacillales; Paenibacillaceae	DNA	N.A.	N.A.	N.A.	N.A.	https://www.jcm.riken.jp/cgi-bin/jcm/jcm_number?JCM=9795	JGD12626	https://dna.brc.riken.jp/DataSheet/JGD12626	67.8
JCM 9796	Paenibacillus sp.	Bacteria; Bacillati; Bacillota; Bacilli; Bacillales; Paenibacillaceae	DNA	N.A.	N.A.	N.A.	N.A.	https://www.jcm.riken.jp/cgi-bin/jcm/jcm_number?JCM=9796	JGD12627	https://dna.brc.riken.jp/DataSheet/JGD12627	76.6
JCM 7540	Paenibacillus thiaminolyticus	Bacteria; Bacillati; Bacillota; Bacilli; Bacillales; Paenibacillaceae	DNA	N.A.	N.A.	N.A.	N.A.	https://www.jcm.riken.jp/cgi-bin/jcm/jcm_number?JCM=7540	JGD08471	https://dna.brc.riken.jp/DataSheet/JGD08471	193
JCM 2151	Staphylococcus aureus	Bacteria; Bacillati; Bacillota; Bacilli; Bacillales; Staphylococcaceae	DNA	N.A.	N.A.	N.A.	N.A.	https://www.jcm.riken.jp/cgi-bin/jcm/jcm_number?JCM=2151	JGD07701	https://dna.brc.riken.jp/DataSheet/JGD07701	34
JCM 2179	Staphylococcus aureus	Bacteria; Bacillati; Bacillota; Bacilli; Bacillales; Staphylococcaceae	DNA	N.A.	N.A.	N.A.	N.A.	https://www.jcm.riken.jp/cgi-bin/jcm/jcm_number?JCM=2179	JGD06279	https://dna.brc.riken.jp/DataSheet/JGD06279	7.72
JCM 8702	Staphylococcus aureus	Bacteria; Bacillati; Bacillota; Bacilli; Bacillales; Staphylococcaceae	DNA	N.A.	N.A.	N.A.	N.A.	https://www.jcm.riken.jp/cgi-bin/jcm/jcm_number?JCM=8702	JGD06280	https://dna.brc.riken.jp/DataSheet/JGD06280	31
JCM 14719	Calditerricola satsumensis	Bacteria; Bacillati; Bacillota; Bacilli; Calditerricolales; Calditerricolaceae	DNA	N.A.	N.A.	N.A.	N.A.	https://www.jcm.riken.jp/cgi-bin/jcm/jcm_number?JCM=14719	JGD12594	https://dna.brc.riken.jp/DataSheet/JGD12594	143
JCM 14720	Calditerricola yamamurae	Bacteria; Bacillati; Bacillota; Bacilli; Calditerricolales; Calditerricolaceae	Culture	619	72	100	3	https://www.jcm.riken.jp/cgi-bin/jcm/jcm_number?JCM=14720	N.A.	N.A.	131
JCM 20313	Enterococcus faecalis	Bacteria; Bacillati; Bacillota; Bacilli; Lactobacillales; Enterococcaceae	DNA	N.A.	N.A.	N.A.	N.A.	https://www.jcm.riken.jp/cgi-bin/jcm/jcm_number?JCM=20313	JGD07427	https://dna.brc.riken.jp/DataSheet/JGD07427	14
JCM 31185	Furfurilactobacillus curtus	Bacteria; Bacillati; Bacillota; Bacilli; Lactobacillales; Lactobacillaceae	Culture	1	30	plate x5	3	https://www.jcm.riken.jp/cgi-bin/jcm/jcm_number?JCM=31185	N.A.	N.A.	40
JCM 17300	Ligilactobacillus faecis	Bacteria; Bacillati; Bacillota; Bacilli; Lactobacillales; Lactobacillaceae	Culture	291	37	plate x5	3	https://www.jcm.riken.jp/cgi-bin/jcm/jcm_number?JCM=17300	N.A.	N.A.	24.6
JCM 18671	Secundilactobacillus oryzae	Bacteria; Bacillati; Bacillota; Bacilli; Lactobacillales; Lactobacillaceae	DNA	N.A.	N.A.	N.A.	N.A.	https://www.jcm.riken.jp/cgi-bin/jcm/jcm_number?JCM=18671	JGD12563	https://dna.brc.riken.jp/DataSheet/JGD12563	85.4
JCM 31116	Streptococcus alactolyticus	Bacteria; Bacillati; Bacillota; Bacilli; Lactobacillales; Streptococcaceae	Culture	28	37	plate x5	3	https://www.jcm.riken.jp/cgi-bin/jcm/jcm_number?JCM=31116	N.A.	N.A.	92.2
JCM 5802	Streptococcus equinus	Bacteria; Bacillati; Bacillota; Bacilli; Lactobacillales; Streptococcaceae	DNA	N.A.	N.A.	N.A.	N.A.	https://www.jcm.riken.jp/cgi-bin/jcm/jcm_number?JCM=5802	JGD06654	https://dna.brc.riken.jp/DataSheet/JGD06654	18.5
JCM 12261	Streptococcus gallolyticus subsp. pasteurianus	Bacteria; Bacillati; Bacillota; Bacilli; Lactobacillales; Streptococcaceae	Culture	14	37	plate x5	3	https://www.jcm.riken.jp/cgi-bin/jcm/jcm_number?JCM=12261	N.A.	N.A.	193
JCM 5176	Streptococcus sobrinus	Bacteria; Bacillati; Bacillota; Bacilli; Lactobacillales; Streptococcaceae	DNA	N.A.	N.A.	N.A.	N.A.	https://www.jcm.riken.jp/cgi-bin/jcm/jcm_number?JCM=5176	JGD08352	https://dna.brc.riken.jp/DataSheet/JGD08352	15.9
JCM 16981	Salinicoccus jeotgali	Bacteria; Bacillati; Bacillota; Bacilli; Staphylococcales; Salinicoccaceae	Culture	41	30	100	3	https://www.jcm.riken.jp/cgi-bin/jcm/jcm_number?JCM=16981	N.A.	N.A.	522
JCM 19029	Salinicoccus sesuvii	Bacteria; Bacillati; Bacillota; Bacilli; Staphylococcales; Salinicoccaceae	Culture	118	28	100	3	https://www.jcm.riken.jp/cgi-bin/jcm/jcm_number?JCM=19029	N.A.	N.A.	208
JCM 12822	Salinicoccus siamensis	Bacteria; Bacillati; Bacillota; Bacilli; Staphylococcales; Salinicoccaceae	Culture	377	37	100	6	https://www.jcm.riken.jp/cgi-bin/jcm/jcm_number?JCM=12822	N.A.	N.A.	308
JCM 19376	Fusibacter bizertensis	Bacteria; Bacillati; Bacillota; Clostridia; Eubacteriales	Culture	991	30	1000	2	https://www.jcm.riken.jp/cgi-bin/jcm/jcm_number?JCM=19376	N.A.	N.A.	338
JCM 19912	Fusibacter fontis	Bacteria; Bacillati; Bacillota; Clostridia; Eubacteriales	Culture	991	35	1000	1	https://www.jcm.riken.jp/cgi-bin/jcm/jcm_number?JCM=19912	N.A.	N.A.	195
JCM 13267	Howardella ureilytica	Bacteria; Bacillati; Bacillota; Clostridia; Eubacteriales	Culture	489	37	100	3	https://www.jcm.riken.jp/cgi-bin/jcm/jcm_number?JCM=13267	N.A.	N.A.	2.62
JCM 30795	Agathobaculum butyriciproducens	Bacteria; Bacillati; Bacillota; Clostridia; Eubacteriales; Butyricicoccaceae	Culture	676	37	100	3	https://www.jcm.riken.jp/cgi-bin/jcm/jcm_number?JCM=30795	N.A.	N.A.	462
JCM 1385	Clostridium baratii	Bacteria; Bacillati; Bacillota; Clostridia; Eubacteriales; Clostridiaceae	Culture	14	37	plate x5	3	https://www.jcm.riken.jp/cgi-bin/jcm/jcm_number?JCM=1385	N.A.	N.A.	88.2
JCM 9989	Clostridium budayi	Bacteria; Bacillati; Bacillota; Clostridia; Eubacteriales; Clostridiaceae	Culture	14	37	plate x5	3	https://www.jcm.riken.jp/cgi-bin/jcm/jcm_number?JCM=9989	N.A.	N.A.	59.6
JCM 1393	Clostridium carnis	Bacteria; Bacillati; Bacillota; Clostridia; Eubacteriales; Clostridiaceae	Culture	14	37	plate x5	3	https://www.jcm.riken.jp/cgi-bin/jcm/jcm_number?JCM=1393	N.A.	N.A.	98.6
JCM 14030	Clostridium nitrophenolicum	Bacteria; Bacillati; Bacillota; Clostridia; Eubacteriales; Clostridiaceae	Culture	75	30	plate x5	3	https://www.jcm.riken.jp/cgi-bin/jcm/jcm_number?JCM=14030	N.A.	N.A.	199
JCM 1406	Clostridium novyi	Bacteria; Bacillati; Bacillota; Clostridia; Eubacteriales; Clostridiaceae	Culture	14	37	plate x5	3	https://www.jcm.riken.jp/cgi-bin/jcm/jcm_number?JCM=1406	N.A.	N.A.	3
JCM 10519	Clostridium sp.	Bacteria; Bacillati; Bacillota; Clostridia; Eubacteriales; Clostridiaceae	DNA	N.A.	N.A.	N.A.	N.A.	https://www.jcm.riken.jp/cgi-bin/jcm/jcm_number?JCM=10519	JGD12528	https://dna.brc.riken.jp/DataSheet/JGD12528	58
JCM 21531	Acetivibrio straminisolvens	Bacteria; Bacillati; Bacillota; Clostridia; Eubacteriales; Oscillospiraceae	DNA	N.A.	N.A.	N.A.	N.A.	https://www.jcm.riken.jp/cgi-bin/jcm/jcm_number?JCM=21531	JGD12600	https://dna.brc.riken.jp/DataSheet/JGD12600	18.5
JCM 17042	Ruminococcus champanellensis	Bacteria; Bacillati; Bacillota; Clostridia; Eubacteriales; Oscillospiraceae	DNA	N.A.	N.A.	N.A.	N.A.	https://www.jcm.riken.jp/cgi-bin/jcm/jcm_number?JCM=17042	JGD12251	https://dna.brc.riken.jp/DataSheet/JGD12251	55.4
JCM 17209	Desulfovectis peckii	Bacteria; Bacillati; Bacillota; Clostridia; Eubacteriales; Peptococcaceae	Culture	843	55	1000	4	https://www.jcm.riken.jp/cgi-bin/jcm/jcm_number?JCM=17209	N.A.	N.A.	84.6
JCM 15048	Symbiobacterium ostreiconchae	Bacteria; Bacillati; Bacillota; Clostridia; Eubacteriales; Symbiobacteriaceae	Culture	653	60	1000	4	https://www.jcm.riken.jp/cgi-bin/jcm/jcm_number?JCM=15048	N.A.	N.A.	730
JCM 15996	Symbiobacterium turbinis	Bacteria; Bacillati; Bacillota; Clostridia; Eubacteriales; Symbiobacteriaceae	Culture	766	55	100	2	https://www.jcm.riken.jp/cgi-bin/jcm/jcm_number?JCM=15996	N.A.	N.A.	33.6
JCM 18213	Halanaerobium sehlinense	Bacteria; Bacillati; Bacillota; Clostridia; Halanaerobiales; Halanaerobiaceae	Culture	929	43	100	2	https://www.jcm.riken.jp/cgi-bin/jcm/jcm_number?JCM=18213	N.A.	N.A.	53
JCM 15060	Halanaerobaculum tunisiense	Bacteria; Bacillati; Bacillota; Clostridia; Halanaerobiales; Halobacteroidaceae	Culture	678	42	500	2	https://www.jcm.riken.jp/cgi-bin/jcm/jcm_number?JCM=15060	N.A.	N.A.	60.8
JCM 16358	Halanaerocella petrolearia	Bacteria; Bacillati; Bacillota; Clostridia; Halanaerobiales; Halobacteroidaceae	Culture	791	40	100	1	https://www.jcm.riken.jp/cgi-bin/jcm/jcm_number?JCM=16358	N.A.	N.A.	576
JCM 16312	Defluviitalea saccharophila	Bacteria; Bacillati; Bacillota; Clostridia; Lachnospirales; Defluviitaleaceae	Culture	786	50	100	1	https://www.jcm.riken.jp/cgi-bin/jcm/jcm_number?JCM=16312	N.A.	N.A.	238
JCM 17205	Blautia faecis	Bacteria; Bacillati; Bacillota; Clostridia; Lachnospirales; Lachnospiraceae	Culture	1130	37	100	2	https://www.jcm.riken.jp/cgi-bin/jcm/jcm_number?JCM=17205	N.A.	N.A.	328
JCM 17039	Blautia glucerasea	Bacteria; Bacillati; Bacillota; Clostridia; Lachnospirales; Lachnospiraceae	Culture	14	37	plate x5	3	https://www.jcm.riken.jp/cgi-bin/jcm/jcm_number?JCM=17039	N.A.	N.A.	150
JCM 17204	Blautia stercoris	Bacteria; Bacillati; Bacillota; Clostridia; Lachnospirales; Lachnospiraceae	Culture	675	37	100	3	https://www.jcm.riken.jp/cgi-bin/jcm/jcm_number?JCM=17204	N.A.	N.A.	39.2
JCM 18507	Fusicatenibacter saccharivorans	Bacteria; Bacillati; Bacillota; Clostridia; Lachnospirales; Lachnospiraceae	Culture	1130	37	100	2	https://www.jcm.riken.jp/cgi-bin/jcm/jcm_number?JCM=18507	N.A.	N.A.	274
JCM 15917	Mediterraneibacter faecis	Bacteria; Bacillati; Bacillota; Clostridia; Lachnospirales; Lachnospiraceae	DNA	N.A.	N.A.	N.A.	N.A.	https://www.jcm.riken.jp/cgi-bin/jcm/jcm_number?JCM=15917	JGD12531	https://dna.brc.riken.jp/DataSheet/JGD12531	40.2
JCM 13368	Mediterraneibacter glycyrrhizinilyticus	Bacteria; Bacillati; Bacillota; Clostridia; Lachnospirales; Lachnospiraceae	Culture	14	37	plate x5	3	https://www.jcm.riken.jp/cgi-bin/jcm/jcm_number?JCM=13368	N.A.	N.A.	242
JCM 13369	Mediterraneibacter glycyrrhizinilyticus	Bacteria; Bacillati; Bacillota; Clostridia; Lachnospirales; Lachnospiraceae	DNA	N.A.	N.A.	N.A.	N.A.	https://www.jcm.riken.jp/cgi-bin/jcm/jcm_number?JCM=13369	JGD12536	https://dna.brc.riken.jp/DataSheet/JGD12536	42.2
JCM 17581	Roseburia faecis	Bacteria; Bacillati; Bacillota; Clostridia; Lachnospirales; Lachnospiraceae	Culture	1130	37	100	2	https://www.jcm.riken.jp/cgi-bin/jcm/jcm_number?JCM=17581	N.A.	N.A.	140
JCM 11672	Alkaliphilus crotonatoxidans	Bacteria; Bacillati; Bacillota; Clostridia; Peptostreptococcales; Natronincolaceae	Culture	378	37	10	4	https://www.jcm.riken.jp/cgi-bin/jcm/jcm_number?JCM=11672	N.A.	N.A.	106
JCM 13990	Tindallia texcoconensis	Bacteria; Bacillati; Bacillota; Clostridia; Peptostreptococcales; Tindalliaceae	Culture	543	37	100	2	https://www.jcm.riken.jp/cgi-bin/jcm/jcm_number?JCM=13990	N.A.	N.A.	88.4
JCM 16816	Thermoanaerobacter brockii subsp. lactiethylicus	Bacteria; Bacillati; Bacillota; Clostridia; Thermoanaerobacterales; Thermoanaerobacteraceae	Culture	826	60	100	1	https://www.jcm.riken.jp/cgi-bin/jcm/jcm_number?JCM=16816	N.A.	N.A.	55.8
JCM 18270	Thermoanaerobacterium calidifontis	Bacteria; Bacillati; Bacillota; Clostridia; Thermoanaerobacterales; Thermoanaerobacteraceae	Culture	968	55	100	2	https://www.jcm.riken.jp/cgi-bin/jcm/jcm_number?JCM=18270	N.A.	N.A.	332
JCM 15765	Desulfitobacterium aromaticivorans	Bacteria; Bacillati; Bacillota; Desulfitobacteriia; Desulfitobacteriales; Desulfitobacteriaceae	Culture	747	30	100	15	https://www.jcm.riken.jp/cgi-bin/jcm/jcm_number?JCM=15765	N.A.	N.A.	37
JCM 17380	Desulfosporosinus burensis	Bacteria; Bacillati; Bacillota; Desulfitobacteriia; Desulfitobacteriales; Desulfitobacteriaceae	Culture	865	25	100	8	https://www.jcm.riken.jp/cgi-bin/jcm/jcm_number?JCM=17380	N.A.	N.A.	51.6
JCM 31105	Desulfosporosinus nitroreducens	Bacteria; Bacillati; Bacillota; Desulfitobacteriia; Desulfitobacteriales; Desulfitobacteriaceae	Culture	1125	25	100	9	https://www.jcm.riken.jp/cgi-bin/jcm/jcm_number?JCM=31105	N.A.	N.A.	52
JCM 14036	Desulfotomaculum defluvii	Bacteria; Bacillati; Bacillota; Desulfotomaculia; Desulfotomaculales; Desulfotomaculaceae	Culture	547	30	100	6	https://www.jcm.riken.jp/cgi-bin/jcm/jcm_number?JCM=14036	N.A.	N.A.	21.8
JCM 39194	Desulfotomaculum varum	Bacteria; Bacillati; Bacillota; Desulfotomaculia; Desulfotomaculales; Desulfotomaculaceae	Culture	780	50	100	16	https://www.jcm.riken.jp/cgi-bin/jcm/jcm_number?JCM=39194	N.A.	N.A.	58.2
JCM 10604	Coprobacillus cateniformis	Bacteria; Bacillati; Bacillota; Erysipelotrichia; Erysipelotrichales; Coprobacillaceae	DNA	N.A.	N.A.	N.A.	N.A.	https://www.jcm.riken.jp/cgi-bin/jcm/jcm_number?JCM=10604	JGD12529	https://dna.brc.riken.jp/DataSheet/JGD12529	53.6
JCM 30191	Breznakia pachnodae	Bacteria; Bacillati; Bacillota; Erysipelotrichia; Erysipelotrichales; Erysipelotrichaceae	Culture	1045	25	100	12	https://www.jcm.riken.jp/cgi-bin/jcm/jcm_number?JCM=30191	N.A.	N.A.	326
JCM 32836	Desulfosporomusa polytropa	Bacteria; Bacillati; Bacillota; Negativicutes; Selenomonadales; Sporomusaceae	Culture	430	28	1000	8	https://www.jcm.riken.jp/cgi-bin/jcm/jcm_number?JCM=32836	N.A.	N.A.	147
JCM 13218	Sporomusa intestinalis	Bacteria; Bacillati; Bacillota; Negativicutes; Selenomonadales; Sporomusaceae	Culture	480	30	100	5	https://www.jcm.riken.jp/cgi-bin/jcm/jcm_number?JCM=13218	N.A.	N.A.	81
JCM 31403	Megasphaera hexanoica	Bacteria; Bacillati; Bacillota; Negativicutes; Veillonellales; Veillonellaceae	Culture	14	37	plate x5	3	https://www.jcm.riken.jp/cgi-bin/jcm/jcm_number?JCM=31403	N.A.	N.A.	79.4
JCM 13344	Syntrophomonas erecta subsp. sporosyntropha	Bacteria; Bacillati; Bacillota; Syntrophomonadia; Syntrophomonadales; Syntrophomonadaceae	Culture	499	37	100	12	https://www.jcm.riken.jp/cgi-bin/jcm/jcm_number?JCM=13344	N.A.	N.A.	76
JCM 17260	Thermosyntropha tengcongensis	Bacteria; Bacillati; Bacillota; Syntrophomonadia; Syntrophomonadales; Syntrophomonadaceae	Culture	850	60	100	1	https://www.jcm.riken.jp/cgi-bin/jcm/jcm_number?JCM=17260	N.A.	N.A.	155
JCM 13210	Thermaerobacter litoralis	Bacteria; Bacillati; Bacillota; Thermaerobacteria; Thermaerobacterales; Thermaerobacteraceae	Culture	41	70	100	5	https://www.jcm.riken.jp/cgi-bin/jcm/jcm_number?JCM=13210	N.A.	N.A.	183
JCM 11223	Thermaerobacter nagasakiensis	Bacteria; Bacillati; Bacillota; Thermaerobacteria; Thermaerobacterales; Thermaerobacteraceae	Culture	41	70	100	3	https://www.jcm.riken.jp/cgi-bin/jcm/jcm_number?JCM=11223	N.A.	N.A.	584
JCM 17239	Anaerosalibacter bizertensis	Bacteria; Bacillati; Bacillota; Tissierellia; Tissierellales; Sporanaerobacteraceae	Culture	847	40	1000	8	https://www.jcm.riken.jp/cgi-bin/jcm/jcm_number?JCM=17239	N.A.	N.A.	164
JCM 30480	Brassicibacter thermophilus	Bacteria; Bacillati; Bacillota; Tissierellia; Tissierellales; Thermohalobacteraceae	Culture	1063	55	100	3	https://www.jcm.riken.jp/cgi-bin/jcm/jcm_number?JCM=30480	N.A.	N.A.	102
JCM 16120	Caldilinea tarbellica	Bacteria; Bacillati; Chloroflexota; Caldilineae; Caldilineales; Caldilineaceae	Culture	778	60	100	7	https://www.jcm.riken.jp/cgi-bin/jcm/jcm_number?JCM=16120	N.A.	N.A.	22.6
JCM 9492	Aquifex pyrophilus	Bacteria; Pseudomonadati; Aquificota; Aquificia; Aquificales; Aquificaceae	Culture	255	85	100	3	https://www.jcm.riken.jp/cgi-bin/jcm/jcm_number?JCM=9492	N.A.	N.A.	48.8
JCM 13302	Hydrogenivirga okinawensis	Bacteria; Pseudomonadati; Aquificota; Aquificia; Aquificales; Aquificaceae	Culture	493	70	100	10	https://www.jcm.riken.jp/cgi-bin/jcm/jcm_number?JCM=13302	N.A.	N.A.	82.8
JCM 10560	Hydrogenobacter subterraneus	Bacteria; Pseudomonadati; Aquificota; Aquificia; Aquificales; Aquificaceae	Culture	268	75	100	1	https://www.jcm.riken.jp/cgi-bin/jcm/jcm_number?JCM=10560	N.A.	N.A.	12.7
JCM 8795	Hydrogenobaculum acidophilum	Bacteria; Pseudomonadati; Aquificota; Aquificia; Aquificales; Aquificaceae	Culture	164	65	100	2	https://www.jcm.riken.jp/cgi-bin/jcm/jcm_number?JCM=8795	N.A.	N.A.	2.26
JCM 12825	Desulfurobacterium crinifex	Bacteria; Pseudomonadati; Aquificota; Aquificia; Desulfurobacteriales; Desulfurobacteriaceae	Culture	448	60	100	5	https://www.jcm.riken.jp/cgi-bin/jcm/jcm_number?JCM=12825	N.A.	N.A.	69.8
JCM 12127	Desulfurobacterium pacificum	Bacteria; Pseudomonadati; Aquificota; Aquificia; Desulfurobacteriales; Desulfurobacteriaceae	Culture	375	75	100	5	https://www.jcm.riken.jp/cgi-bin/jcm/jcm_number?JCM=12127	N.A.	N.A.	85
JCM 11468	Thermovibrio ruber	Bacteria; Pseudomonadati; Aquificota; Aquificia; Desulfurobacteriales; Desulfurobacteriaceae	Culture	322	75	100	3	https://www.jcm.riken.jp/cgi-bin/jcm/jcm_number?JCM=11468	N.A.	N.A.	94
JCM 14244	Venenivibrio stagnispumantis	Bacteria; Pseudomonadati; Aquificota; Aquificia; Hydrogenothermales; Hydrogenothermaceae	Culture	567	70	100	3	https://www.jcm.riken.jp/cgi-bin/jcm/jcm_number?JCM=14244	N.A.	N.A.	71.2
JCM 10556	Bacteroides acidifaciens	Bacteria; Pseudomonadati; Bacteroidota; Bacteroidia; Bacteroidales; Bacteroidaceae	DNA	N.A.	N.A.	N.A.	N.A.	https://www.jcm.riken.jp/cgi-bin/jcm/jcm_number?JCM=10556	JGD12415	https://dna.brc.riken.jp/DataSheet/JGD12415	94.2
JCM 11017	Bacteroides fragilis	Bacteria; Pseudomonadati; Bacteroidota; Bacteroidia; Bacteroidales; Bacteroidaceae	DNA	N.A.	N.A.	N.A.	N.A.	https://www.jcm.riken.jp/cgi-bin/jcm/jcm_number?JCM=11017	JGD12416	https://dna.brc.riken.jp/DataSheet/JGD12416	30.2
JCM 12987	Bacteroides nordii	Bacteria; Pseudomonadati; Bacteroidota; Bacteroidia; Bacteroidales; Bacteroidaceae	DNA	N.A.	N.A.	N.A.	N.A.	https://www.jcm.riken.jp/cgi-bin/jcm/jcm_number?JCM=12987	JGD12422	https://dna.brc.riken.jp/DataSheet/JGD12422	72.8
JCM 10003	Bacteroides pyogenes	Bacteria; Pseudomonadati; Bacteroidota; Bacteroidia; Bacteroidales; Bacteroidaceae	DNA	N.A.	N.A.	N.A.	N.A.	https://www.jcm.riken.jp/cgi-bin/jcm/jcm_number?JCM=10003	JGD12413	https://dna.brc.riken.jp/DataSheet/JGD12413	63.6
JCM 6292	Bacteroides pyogenes	Bacteria; Pseudomonadati; Bacteroidota; Bacteroidia; Bacteroidales; Bacteroidaceae	DNA	N.A.	N.A.	N.A.	N.A.	https://www.jcm.riken.jp/cgi-bin/jcm/jcm_number?JCM=6292	JGD12409	https://dna.brc.riken.jp/DataSheet/JGD12409	84.6
JCM 6294	Bacteroides pyogenes	Bacteria; Pseudomonadati; Bacteroidota; Bacteroidia; Bacteroidales; Bacteroidaceae	DNA	N.A.	N.A.	N.A.	N.A.	https://www.jcm.riken.jp/cgi-bin/jcm/jcm_number?JCM=6294	JGD12410	https://dna.brc.riken.jp/DataSheet/JGD12410	69.6
JCM 10512	Bacteroides reticulotermitis	Bacteria; Pseudomonadati; Bacteroidota; Bacteroidia; Bacteroidales; Bacteroidaceae	DNA	N.A.	N.A.	N.A.	N.A.	https://www.jcm.riken.jp/cgi-bin/jcm/jcm_number?JCM=10512	JGD12414	https://dna.brc.riken.jp/DataSheet/JGD12414	47.8
JCM 16496	Bacteroides rodentium	Bacteria; Pseudomonadati; Bacteroidota; Bacteroidia; Bacteroidales; Bacteroidaceae	DNA	N.A.	N.A.	N.A.	N.A.	https://www.jcm.riken.jp/cgi-bin/jcm/jcm_number?JCM=16496	JGD12451	https://dna.brc.riken.jp/DataSheet/JGD12451	40.6
JCM 15092	Phocaeicola paurosaccharolyticus	Bacteria; Pseudomonadati; Bacteroidota; Bacteroidia; Bacteroidales; Bacteroidaceae	DNA	N.A.	N.A.	N.A.	N.A.	https://www.jcm.riken.jp/cgi-bin/jcm/jcm_number?JCM=15092	JGD12436	https://dna.brc.riken.jp/DataSheet/JGD12436	41.4
JCM 17136	Phocaeicola sartorii	Bacteria; Pseudomonadati; Bacteroidota; Bacteroidia; Bacteroidales; Bacteroidaceae	DNA	N.A.	N.A.	N.A.	N.A.	https://www.jcm.riken.jp/cgi-bin/jcm/jcm_number?JCM=17136	JGD12454	https://dna.brc.riken.jp/DataSheet/JGD12454	53.8
JCM 30204	Dysgonomonas termitidis	Bacteria; Pseudomonadati; Bacteroidota; Bacteroidia; Bacteroidales; Dysgonomonadaceae	Culture	14	30	plate x5	3	https://www.jcm.riken.jp/cgi-bin/jcm/jcm_number?JCM=30204	N.A.	N.A.	524
JCM 12565	Petrimonas sulfuriphila	Bacteria; Pseudomonadati; Bacteroidota; Bacteroidia; Bacteroidales; Dysgonomonadaceae	Culture	431	40	100	6	https://www.jcm.riken.jp/cgi-bin/jcm/jcm_number?JCM=12565	N.A.	N.A.	510
JCM 15907	Porphyromonas gingivicanis	Bacteria; Pseudomonadati; Bacteroidota; Bacteroidia; Bacteroidales; Porphyromonadaceae	DNA	N.A.	N.A.	N.A.	N.A.	https://www.jcm.riken.jp/cgi-bin/jcm/jcm_number?JCM=15907	JGD12465	https://dna.brc.riken.jp/DataSheet/JGD12465	93.2
JCM 17484	Hoylesella saccharolytica	Bacteria; Pseudomonadati; Bacteroidota; Bacteroidia; Bacteroidales; Prevotellaceae	DNA	N.A.	N.A.	N.A.	N.A.	https://www.jcm.riken.jp/cgi-bin/jcm/jcm_number?JCM=17484	JGD12455	https://dna.brc.riken.jp/DataSheet/JGD12455	36.8
JCM 15640	Hoylesella timonensis	Bacteria; Pseudomonadati; Bacteroidota; Bacteroidia; Bacteroidales; Prevotellaceae	DNA	N.A.	N.A.	N.A.	N.A.	https://www.jcm.riken.jp/cgi-bin/jcm/jcm_number?JCM=15640	JGD12446	https://dna.brc.riken.jp/DataSheet/JGD12446	61.2
JCM 15754	Prevotella aurantiaca	Bacteria; Pseudomonadati; Bacteroidota; Bacteroidia; Bacteroidales; Prevotellaceae	DNA	N.A.	N.A.	N.A.	N.A.	https://www.jcm.riken.jp/cgi-bin/jcm/jcm_number?JCM=15754	JGD12447	https://dna.brc.riken.jp/DataSheet/JGD12447	25.8
JCM 15908	Prevotella dentasini	Bacteria; Pseudomonadati; Bacteroidota; Bacteroidia; Bacteroidales; Prevotellaceae	DNA	N.A.	N.A.	N.A.	N.A.	https://www.jcm.riken.jp/cgi-bin/jcm/jcm_number?JCM=15908	JGD12448	https://dna.brc.riken.jp/DataSheet/JGD12448	67.8
JCM 13449	Prevotella denticola	Bacteria; Pseudomonadati; Bacteroidota; Bacteroidia; Bacteroidales; Prevotellaceae	DNA	N.A.	N.A.	N.A.	N.A.	https://www.jcm.riken.jp/cgi-bin/jcm/jcm_number?JCM=13449	JGD12425	https://dna.brc.riken.jp/DataSheet/JGD12425	75.8
JCM 15124	Prevotella falsenii	Bacteria; Pseudomonadati; Bacteroidota; Bacteroidia; Bacteroidales; Prevotellaceae	DNA	N.A.	N.A.	N.A.	N.A.	https://www.jcm.riken.jp/cgi-bin/jcm/jcm_number?JCM=15124	JGD12442	https://dna.brc.riken.jp/DataSheet/JGD12442	17.7
JCM 17724	Prevotella fusca	Bacteria; Pseudomonadati; Bacteroidota; Bacteroidia; Bacteroidales; Prevotellaceae	DNA	N.A.	N.A.	N.A.	N.A.	https://www.jcm.riken.jp/cgi-bin/jcm/jcm_number?JCM=17724	JGD12456	https://dna.brc.riken.jp/DataSheet/JGD12456	50.4
JCM 15637	Prevotella histicola	Bacteria; Pseudomonadati; Bacteroidota; Bacteroidia; Bacteroidales; Prevotellaceae	DNA	N.A.	N.A.	N.A.	N.A.	https://www.jcm.riken.jp/cgi-bin/jcm/jcm_number?JCM=15637	JGD12443	https://dna.brc.riken.jp/DataSheet/JGD12443	58.8
JCM 17725	Prevotella scopos	Bacteria; Pseudomonadati; Bacteroidota; Bacteroidia; Bacteroidales; Prevotellaceae	DNA	N.A.	N.A.	N.A.	N.A.	https://www.jcm.riken.jp/cgi-bin/jcm/jcm_number?JCM=17725	JGD12457	https://dna.brc.riken.jp/DataSheet/JGD12457	73.6
JCM 15579	Marinifilum fragile	Bacteria; Pseudomonadati; Bacteroidota; Bacteroidia; Marinilabiliales; Marinifilaceae	DNA	N.A.	N.A.	N.A.	N.A.	https://www.jcm.riken.jp/cgi-bin/jcm/jcm_number?JCM=15579	JGD12526	https://dna.brc.riken.jp/DataSheet/JGD12526	10.9
JCM 15548	Geofilum rubicundum	Bacteria; Pseudomonadati; Bacteroidota; Bacteroidia; Marinilabiliales; Marinilabiliaceae	DNA	N.A.	N.A.	N.A.	N.A.	https://www.jcm.riken.jp/cgi-bin/jcm/jcm_number?JCM=15548	JGD12525	https://dna.brc.riken.jp/DataSheet/JGD12525	21.8
JCM 15069	Lutaonella thermophila	Bacteria; Pseudomonadati; Bacteroidota; Flavobacteriia; Flavobacteriales; Flavobacteriaceae	Culture	118	45	100	3	https://www.jcm.riken.jp/cgi-bin/jcm/jcm_number?JCM=15069	N.A.	N.A.	816
JCM 15747	Thiofractor thiocamini	Bacteria; Pseudomonadati; Campylobacterota; Epsilonproteobacteria; Campylobacterales	Culture	421	37	100	5	https://www.jcm.riken.jp/cgi-bin/jcm/jcm_number?JCM=15747	N.A.	N.A.	74.6
JCM 2013	Campylobacter jejuni subsp. jejuni	Bacteria; Pseudomonadati; Campylobacterota; Epsilonproteobacteria; Campylobacterales; Campylobacteraceae	DNA	N.A.	N.A.	N.A.	N.A.	https://www.jcm.riken.jp/cgi-bin/jcm/jcm_number?JCM=2013	JGD08023	https://dna.brc.riken.jp/DataSheet/JGD08023	116
JCM 12095	Helicobacter pylori	Bacteria; Pseudomonadati; Campylobacterota; Epsilonproteobacteria; Campylobacterales; Helicobacteraceae	DNA	N.A.	N.A.	N.A.	N.A.	https://www.jcm.riken.jp/cgi-bin/jcm/jcm_number?JCM=12095	JGD07471	https://dna.brc.riken.jp/DataSheet/JGD07471	51.4
JCM 19824	Sulfurovum aggregans	Bacteria; Pseudomonadati; Campylobacterota; Epsilonproteobacteria; Campylobacterales; Sulfurovaceae	Culture	1019	33	100	3	https://www.jcm.riken.jp/cgi-bin/jcm/jcm_number?JCM=19824	N.A.	N.A.	28.6
JCM 11957	Caminibacter profundus	Bacteria; Pseudomonadati; Campylobacterota; Epsilonproteobacteria; Nautiliales; Nautiliaceae	Culture	367	55	500	3	https://www.jcm.riken.jp/cgi-bin/jcm/jcm_number?JCM=11957	N.A.	N.A.	10.7
JCM 15390	Nautilia abyssi	Bacteria; Pseudomonadati; Campylobacterota; Epsilonproteobacteria; Nautiliales; Nautiliaceae	Culture	695	60	100	4	https://www.jcm.riken.jp/cgi-bin/jcm/jcm_number?JCM=15390	N.A.	N.A.	26.8
JCM 15786	Nautilia lithotrophica	Bacteria; Pseudomonadati; Campylobacterota; Epsilonproteobacteria; Nautiliales; Nautiliaceae	Culture	751	55	500	2	https://www.jcm.riken.jp/cgi-bin/jcm/jcm_number?JCM=15786	N.A.	N.A.	3.12
JCM 12457	Thioreductor micantisoli	Bacteria; Pseudomonadati; Campylobacterota; Epsilonproteobacteria; Nautiliales; Thioreductoraceae	DNA	N.A.	N.A.	N.A.	N.A.	https://www.jcm.riken.jp/cgi-bin/jcm/jcm_number?JCM=12457	JGD15487	https://dna.brc.riken.jp/DataSheet/JGD15487	75.6
JCM 15827	Desulfurispirillum alkaliphilum	Bacteria; Pseudomonadati; Chrysiogenota; Chrysiogenia; Chrysiogenales; Chrysiogenaceae	Culture	760	30	100	7	https://www.jcm.riken.jp/cgi-bin/jcm/jcm_number?JCM=15827	N.A.	N.A.	25
JCM 17152	Oligosphaera ethanolica	Bacteria; Pseudomonadati; Lentisphaerota; Oligosphaeria; Oligosphaerales; Oligosphaeraceae	Culture	836	37	100	12	https://www.jcm.riken.jp/cgi-bin/jcm/jcm_number?JCM=17152	N.A.	N.A.	30.8
JCM 13213	Thermodesulfovibrio aggregans	Bacteria; Pseudomonadati; Nitrospirota; Thermodesulfovibrionia; Thermodesulfovibrionales; Thermodesulfovibrionaceae	DNA	N.A.	N.A.	N.A.	N.A.	https://www.jcm.riken.jp/cgi-bin/jcm/jcm_number?JCM=13213	JGD12612	https://dna.brc.riken.jp/DataSheet/JGD12612	328
JCM 13991	Thermodesulfovibrio hydrogeniphilus	Bacteria; Pseudomonadati; Nitrospirota; Thermodesulfovibrionia; Thermodesulfovibrionales; Thermodesulfovibrionaceae	Culture	544	65	100	4	https://www.jcm.riken.jp/cgi-bin/jcm/jcm_number?JCM=13991	N.A.	N.A.	35.4
JCM 17478	Thermopirellula anaerolimosa	Bacteria; Pseudomonadati; Planctomycetota; Planctomycetia	Culture	835	45	1000	13	https://www.jcm.riken.jp/cgi-bin/jcm/jcm_number?JCM=17478	N.A.	N.A.	212
JCM 19991	Thermogutta hypogea	Bacteria; Pseudomonadati; Planctomycetota; Planctomycetia; Pirellulales; Thermoguttaceae	Culture	1031	50	1000	6	https://www.jcm.riken.jp/cgi-bin/jcm/jcm_number?JCM=19991	N.A.	N.A.	63.2
JCM 19992	Thermostilla marina	Bacteria; Pseudomonadati; Planctomycetota; Planctomycetia; Pirellulales; Thermoguttaceae	Culture	1032	50	100	16	https://www.jcm.riken.jp/cgi-bin/jcm/jcm_number?JCM=19992	N.A.	N.A.	30.2
JCM 25146	Acetobacter okinawensis	Bacteria; Pseudomonadati; Pseudomonadota; Alphaproteobacteria; Acetobacterales; Acetobacteraceae	DNA	N.A.	N.A.	N.A.	N.A.	https://www.jcm.riken.jp/cgi-bin/jcm/jcm_number?JCM=25146	JGD12439	https://dna.brc.riken.jp/DataSheet/JGD12439	64.2
JCM 25330	Acetobacter persici	Bacteria; Pseudomonadati; Pseudomonadota; Alphaproteobacteria; Acetobacterales; Acetobacteraceae	DNA	N.A.	N.A.	N.A.	N.A.	https://www.jcm.riken.jp/cgi-bin/jcm/jcm_number?JCM=25330	JGD12440	https://dna.brc.riken.jp/DataSheet/JGD12440	67.6
JCM 15831	Asaia astilbis	Bacteria; Pseudomonadati; Pseudomonadota; Alphaproteobacteria; Acetobacterales; Acetobacteraceae	DNA	N.A.	N.A.	N.A.	N.A.	https://www.jcm.riken.jp/cgi-bin/jcm/jcm_number?JCM=15831	JGD12438	https://dna.brc.riken.jp/DataSheet/JGD12438	49.6
JCM 25414	Asaia platycodi	Bacteria; Pseudomonadati; Pseudomonadota; Alphaproteobacteria; Acetobacterales; Acetobacteraceae	DNA	N.A.	N.A.	N.A.	N.A.	https://www.jcm.riken.jp/cgi-bin/jcm/jcm_number?JCM=25414	JGD12464	https://dna.brc.riken.jp/DataSheet/JGD12464	159
JCM 25354	Asaia prunellae	Bacteria; Pseudomonadati; Pseudomonadota; Alphaproteobacteria; Acetobacterales; Acetobacteraceae	DNA	N.A.	N.A.	N.A.	N.A.	https://www.jcm.riken.jp/cgi-bin/jcm/jcm_number?JCM=25354	JGD12441	https://dna.brc.riken.jp/DataSheet/JGD12441	40.8
JCM 21176	Gluconobacter cerinus	Bacteria; Pseudomonadati; Pseudomonadota; Alphaproteobacteria; Acetobacterales; Acetobacteraceae	DNA	N.A.	N.A.	N.A.	N.A.	https://www.jcm.riken.jp/cgi-bin/jcm/jcm_number?JCM=21176	JGD07997	https://dna.brc.riken.jp/DataSheet/JGD07997	147
JCM 25156	Komagataeibacter kakiaceti	Bacteria; Pseudomonadati; Pseudomonadota; Alphaproteobacteria; Acetobacterales; Acetobacteraceae	DNA	N.A.	N.A.	N.A.	N.A.	https://www.jcm.riken.jp/cgi-bin/jcm/jcm_number?JCM=25156	JGD12408	https://dna.brc.riken.jp/DataSheet/JGD12408	87.6
JCM 16408	Methylobacterium phyllosphaerae	Bacteria; Pseudomonadati; Pseudomonadota; Alphaproteobacteria; Hyphomicrobiales; Methylobacteriaceae	DNA	N.A.	N.A.	N.A.	N.A.	https://www.jcm.riken.jp/cgi-bin/jcm/jcm_number?JCM=16408	JGD12620	https://dna.brc.riken.jp/DataSheet/JGD12620	51.6
JCM 2811	Methylorubrum rhodinum	Bacteria; Pseudomonadati; Pseudomonadota; Alphaproteobacteria; Hyphomicrobiales; Methylobacteriaceae	DNA	N.A.	N.A.	N.A.	N.A.	https://www.jcm.riken.jp/cgi-bin/jcm/jcm_number?JCM=2811	JGD12515	https://dna.brc.riken.jp/DataSheet/JGD12515	86.4
JCM 10893	Methylorubrum thiocyanatum	Bacteria; Pseudomonadati; Pseudomonadota; Alphaproteobacteria; Hyphomicrobiales; Methylobacteriaceae	DNA	N.A.	N.A.	N.A.	N.A.	https://www.jcm.riken.jp/cgi-bin/jcm/jcm_number?JCM=10893	JGD12518	https://dna.brc.riken.jp/DataSheet/JGD12518	148
JCM 18382	Bradyrhizobium sp.	Bacteria; Pseudomonadati; Pseudomonadota; Alphaproteobacteria; Hyphomicrobiales; Nitrobacteraceae	DNA	N.A.	N.A.	N.A.	N.A.	https://www.jcm.riken.jp/cgi-bin/jcm/jcm_number?JCM=18382	JGD12648	https://dna.brc.riken.jp/DataSheet/JGD12648	98.2
JCM 21793	Nitratireductor aquibiodomus	Bacteria; Pseudomonadati; Pseudomonadota; Alphaproteobacteria; Hyphomicrobiales; Phyllobacteriaceae	DNA	N.A.	N.A.	N.A.	N.A.	https://www.jcm.riken.jp/cgi-bin/jcm/jcm_number?JCM=21793	JGD12503	https://dna.brc.riken.jp/DataSheet/JGD12503	101
JCM 30711	Micropepsis pineolensis	Bacteria; Pseudomonadati; Pseudomonadota; Alphaproteobacteria; Micropepsales; Micropepsaceae	Culture	1086	35	100	3	https://www.jcm.riken.jp/cgi-bin/jcm/jcm_number?JCM=30711	N.A.	N.A.	56.2
JCM 14636	Piezobacter thermophilus	Bacteria; Pseudomonadati; Pseudomonadota; Alphaproteobacteria; Rhodobacterales; Paracoccaceae	Culture	603	50	100	3	https://www.jcm.riken.jp/cgi-bin/jcm/jcm_number?JCM=14636	N.A.	N.A.	105
JCM 21060	Rhodocista centenaria	Bacteria; Pseudomonadati; Pseudomonadota; Alphaproteobacteria; Rhodospirillales; Azospirillaceae	DNA	N.A.	N.A.	N.A.	N.A.	https://www.jcm.riken.jp/cgi-bin/jcm/jcm_number?JCM=21060	JGD08932	https://dna.brc.riken.jp/DataSheet/JGD08932	70
JCM 19705	Fodinicurvata halophila	Bacteria; Pseudomonadati; Pseudomonadota; Alphaproteobacteria; Rhodospirillales; Fodinicurvataceae	Culture	1011	37	100	3	https://www.jcm.riken.jp/cgi-bin/jcm/jcm_number?JCM=19705	N.A.	N.A.	678
JCM 17960	Magnetospira thiophila	Bacteria; Pseudomonadati; Pseudomonadota; Alphaproteobacteria; Rhodospirillales; Magnetospiraceae	Culture	915	25	100	14	https://www.jcm.riken.jp/cgi-bin/jcm/jcm_number?JCM=17960	N.A.	N.A.	7.64
JCM 23214	Sneathiella glossodoripedis	Bacteria; Pseudomonadati; Pseudomonadota; Alphaproteobacteria; Sneathiellales; Sneathiellaceae	DNA	N.A.	N.A.	N.A.	N.A.	https://www.jcm.riken.jp/cgi-bin/jcm/jcm_number?JCM=23214	JGD12505	https://dna.brc.riken.jp/DataSheet/JGD12505	77.6
JCM 12421	Thiobacter subterraneus	Bacteria; Pseudomonadati; Pseudomonadota; Betaproteobacteria; Burkholderiales	Culture	419	55	100	4	https://www.jcm.riken.jp/cgi-bin/jcm/jcm_number?JCM=12421	N.A.	N.A.	240
JCM 16107	Thiomonas islandica	Bacteria; Pseudomonadati; Pseudomonadota; Betaproteobacteria; Burkholderiales	Culture	775	45	100	3	https://www.jcm.riken.jp/cgi-bin/jcm/jcm_number?JCM=16107	N.A.	N.A.	23
JCM 18799	Achromobacter sp.	Bacteria; Pseudomonadati; Pseudomonadota; Betaproteobacteria; Burkholderiales; Alcaligenaceae	DNA	N.A.	N.A.	N.A.	N.A.	https://www.jcm.riken.jp/cgi-bin/jcm/jcm_number?JCM=18799	JGD12616	https://dna.brc.riken.jp/DataSheet/JGD12616	238
JCM 9787	Achromobacter xylosoxidans	Bacteria; Pseudomonadati; Pseudomonadota; Betaproteobacteria; Burkholderiales; Alcaligenaceae	DNA	N.A.	N.A.	N.A.	N.A.	https://www.jcm.riken.jp/cgi-bin/jcm/jcm_number?JCM=9787	JGD12614	https://dna.brc.riken.jp/DataSheet/JGD12614	560
JCM 20666	Alcaligenes faecalis	Bacteria; Pseudomonadati; Pseudomonadota; Betaproteobacteria; Burkholderiales; Alcaligenaceae	DNA	N.A.	N.A.	N.A.	N.A.	https://www.jcm.riken.jp/cgi-bin/jcm/jcm_number?JCM=20666	JGD07089	https://dna.brc.riken.jp/DataSheet/JGD07089	137
JCM 10599	Paraburkholderia kururiensis	Bacteria; Pseudomonadati; Pseudomonadota; Betaproteobacteria; Burkholderiales; Burkholderiaceae	DNA	N.A.	N.A.	N.A.	N.A.	https://www.jcm.riken.jp/cgi-bin/jcm/jcm_number?JCM=10599	JGD12502	https://dna.brc.riken.jp/DataSheet/JGD12502	126
JCM 19000	Silvimonas sp.	Bacteria; Pseudomonadati; Pseudomonadota; Betaproteobacteria; Neisseriales; Chitinibacteraceae	DNA	N.A.	N.A.	N.A.	N.A.	https://www.jcm.riken.jp/cgi-bin/jcm/jcm_number?JCM=19000	JGD12654	https://dna.brc.riken.jp/DataSheet/JGD12654	35.8
JCM 12992	Neisseria mucosa	Bacteria; Pseudomonadati; Pseudomonadota; Betaproteobacteria; Neisseriales; Neisseriaceae	DNA	N.A.	N.A.	N.A.	N.A.	https://www.jcm.riken.jp/cgi-bin/jcm/jcm_number?JCM=12992	JGD07426	https://dna.brc.riken.jp/DataSheet/JGD07426	96.4
JCM 2850	Methylobacillus glycogenes	Bacteria; Pseudomonadati; Pseudomonadota; Betaproteobacteria; Nitrosomonadales; Methylophilaceae	DNA	N.A.	N.A.	N.A.	N.A.	https://www.jcm.riken.jp/cgi-bin/jcm/jcm_number?JCM=2850	JGD12506	https://dna.brc.riken.jp/DataSheet/JGD12506	81.6
JCM 15047	Thiobacillus thiophilus	Bacteria; Pseudomonadati; Pseudomonadota; Betaproteobacteria; Nitrosomonadales; Thiobacillaceae	Culture	91	25	100	6	https://www.jcm.riken.jp/cgi-bin/jcm/jcm_number?JCM=15047	N.A.	N.A.	114
JCM 12309	Thauera sp.	Bacteria; Pseudomonadati; Pseudomonadota; Betaproteobacteria; Rhodocyclales; Zoogloeaceae	DNA	N.A.	N.A.	N.A.	N.A.	https://www.jcm.riken.jp/cgi-bin/jcm/jcm_number?JCM=12309	JGD12510	https://dna.brc.riken.jp/DataSheet/JGD12510	104
JCM 14267	Alkalimonas collagenimarina	Bacteria; Pseudomonadati; Pseudomonadota; Gammaproteobacteria	Culture	571	30	100	4	https://www.jcm.riken.jp/cgi-bin/jcm/jcm_number?JCM=14267	N.A.	N.A.	842
JCM 14758	Shewanella algae	Bacteria; Pseudomonadati; Pseudomonadota; Gammaproteobacteria; Alteromonadales; Shewanellaceae	DNA	N.A.	N.A.	N.A.	N.A.	https://www.jcm.riken.jp/cgi-bin/jcm/jcm_number?JCM=14758	JGD12481	https://dna.brc.riken.jp/DataSheet/JGD12481	84.6
JCM 15074	Shewanella marina	Bacteria; Pseudomonadati; Pseudomonadota; Gammaproteobacteria; Alteromonadales; Shewanellaceae	DNA	N.A.	N.A.	N.A.	N.A.	https://www.jcm.riken.jp/cgi-bin/jcm/jcm_number?JCM=15074	JGD12482	https://dna.brc.riken.jp/DataSheet/JGD12482	130
JCM 17961	Endothiovibrio diazotrophicus	Bacteria; Pseudomonadati; Pseudomonadota; Gammaproteobacteria; Chromatiales; Thioalkalispiraceae	Culture	915	25	100	14	https://www.jcm.riken.jp/cgi-bin/jcm/jcm_number?JCM=17961	N.A.	N.A.	2.12
JCM 14586	Thioprofundum lithotrophicum	Bacteria; Pseudomonadati; Pseudomonadota; Gammaproteobacteria; Chromatiales; Thioprofundaceae	Culture	592	50	100	3	https://www.jcm.riken.jp/cgi-bin/jcm/jcm_number?JCM=14586	N.A.	N.A.	238
JCM 20135	Escherichia coli	Bacteria; Pseudomonadati; Pseudomonadota; Gammaproteobacteria; Enterobacterales; Enterobacteriaceae	DNA	N.A.	N.A.	N.A.	N.A.	https://www.jcm.riken.jp/cgi-bin/jcm/jcm_number?JCM=20135	JGD07547	https://dna.brc.riken.jp/DataSheet/JGD07547	36.8
JCM 20051	Raoultella sp.	Bacteria; Pseudomonadati; Pseudomonadota; Gammaproteobacteria; Enterobacterales; Enterobacteriaceae	DNA	N.A.	N.A.	N.A.	N.A.	https://www.jcm.riken.jp/cgi-bin/jcm/jcm_number?JCM=20051	JGD08997	https://dna.brc.riken.jp/DataSheet/JGD08997	100
JCM 6977	Salmonella enterica subsp. enterica	Bacteria; Pseudomonadati; Pseudomonadota; Gammaproteobacteria; Enterobacterales; Enterobacteriaceae	DNA	N.A.	N.A.	N.A.	N.A.	https://www.jcm.riken.jp/cgi-bin/jcm/jcm_number?JCM=6977	JGD14628	https://dna.brc.riken.jp/DataSheet/JGD14628	9.96
JCM 19379	Methyloparacoccus murrellii	Bacteria; Pseudomonadati; Pseudomonadota; Gammaproteobacteria; Methylococcales; Methylococcaceae	Culture	992	30	100	10	https://www.jcm.riken.jp/cgi-bin/jcm/jcm_number?JCM=19379	N.A.	N.A.	49.8
JCM 14076	Methylosoma difficile	Bacteria; Pseudomonadati; Pseudomonadota; Gammaproteobacteria; Methylococcales; Methylococcaceae	Culture	556	20	500	13	https://www.jcm.riken.jp/cgi-bin/jcm/jcm_number?JCM=14076	N.A.	N.A.	13.9
JCM 13664	Methylothermus subterraneus	Bacteria; Pseudomonadati; Pseudomonadota; Gammaproteobacteria; Methylococcales; Methylothermaceae	Culture	523	55	100	7	https://www.jcm.riken.jp/cgi-bin/jcm/jcm_number?JCM=13664	N.A.	N.A.	14.8
JCM 18900	Psychrobacter sp.	Bacteria; Pseudomonadati; Pseudomonadota; Gammaproteobacteria; Moraxellales; Moraxellaceae	DNA	N.A.	N.A.	N.A.	N.A.	https://www.jcm.riken.jp/cgi-bin/jcm/jcm_number?JCM=18900	JGD12635	https://dna.brc.riken.jp/DataSheet/JGD12635	336
JCM 18901	Psychrobacter sp.	Bacteria; Pseudomonadati; Pseudomonadota; Gammaproteobacteria; Moraxellales; Moraxellaceae	DNA	N.A.	N.A.	N.A.	N.A.	https://www.jcm.riken.jp/cgi-bin/jcm/jcm_number?JCM=18901	JGD12636	https://dna.brc.riken.jp/DataSheet/JGD12636	262
JCM 18902	Psychrobacter sp.	Bacteria; Pseudomonadati; Pseudomonadota; Gammaproteobacteria; Moraxellales; Moraxellaceae	DNA	N.A.	N.A.	N.A.	N.A.	https://www.jcm.riken.jp/cgi-bin/jcm/jcm_number?JCM=18902	JGD12637	https://dna.brc.riken.jp/DataSheet/JGD12637	232
JCM 18903	Psychrobacter sp.	Bacteria; Pseudomonadati; Pseudomonadota; Gammaproteobacteria; Moraxellales; Moraxellaceae	DNA	N.A.	N.A.	N.A.	N.A.	https://www.jcm.riken.jp/cgi-bin/jcm/jcm_number?JCM=18903	JGD12638	https://dna.brc.riken.jp/DataSheet/JGD12638	91.4
JCM 16084	Halomonas beimenensis	Bacteria; Pseudomonadati; Pseudomonadota; Gammaproteobacteria; Oceanospirillales; Halomonadaceae	Culture	771	37	100	3	https://www.jcm.riken.jp/cgi-bin/jcm/jcm_number?JCM=16084	N.A.	N.A.	876
JCM 16914	Halomonas cibimaris	Bacteria; Pseudomonadati; Pseudomonadota; Gammaproteobacteria; Oceanospirillales; Halomonadaceae	Culture	599	30	100	5	https://www.jcm.riken.jp/cgi-bin/jcm/jcm_number?JCM=16914	N.A.	N.A.	372
JCM 30151	Halomonas garicola	Bacteria; Pseudomonadati; Pseudomonadota; Gammaproteobacteria; Oceanospirillales; Halomonadaceae	Culture	599	30	100	2	https://www.jcm.riken.jp/cgi-bin/jcm/jcm_number?JCM=30151	N.A.	N.A.	272
JCM 14803	Halomonas salifodinae	Bacteria; Pseudomonadati; Pseudomonadota; Gammaproteobacteria; Oceanospirillales; Halomonadaceae	Culture	632	30	100	3	https://www.jcm.riken.jp/cgi-bin/jcm/jcm_number?JCM=14803	N.A.	N.A.	1460
JCM 21221	Halomonas salina	Bacteria; Pseudomonadati; Pseudomonadota; Gammaproteobacteria; Oceanospirillales; Halomonadaceae	Culture	599	25	100	2	https://www.jcm.riken.jp/cgi-bin/jcm/jcm_number?JCM=21221	N.A.	N.A.	954
JCM 19368	Halomonas shantousis	Bacteria; Pseudomonadati; Pseudomonadota; Gammaproteobacteria; Oceanospirillales; Halomonadaceae	Culture	118	30	100	3	https://www.jcm.riken.jp/cgi-bin/jcm/jcm_number?JCM=19368	N.A.	N.A.	1120
JCM 20774	Marinomonas vaga	Bacteria; Pseudomonadati; Pseudomonadota; Gammaproteobacteria; Oceanospirillales; Oceanospirillaceae	Culture	118	25	100	3	https://www.jcm.riken.jp/cgi-bin/jcm/jcm_number?JCM=20774	N.A.	N.A.	1100
JCM 2434	Aggregatibacter actinomycetemcomitans	Bacteria; Pseudomonadati; Pseudomonadota; Gammaproteobacteria; Pasteurellales; Pasteurellaceae	DNA	N.A.	N.A.	N.A.	N.A.	https://www.jcm.riken.jp/cgi-bin/jcm/jcm_number?JCM=2434	JGD07948	https://dna.brc.riken.jp/DataSheet/JGD07948	344
JCM 12291	Marinobacter alkaliphilus	Bacteria; Pseudomonadati; Pseudomonadota; Gammaproteobacteria; Pseudomonadales; Marinobacteraceae	Culture	392	30	100	4	https://www.jcm.riken.jp/cgi-bin/jcm/jcm_number?JCM=12291	N.A.	N.A.	1220
JCM 21475	Azotobacter vinelandii	Bacteria; Pseudomonadati; Pseudomonadota; Gammaproteobacteria; Pseudomonadales; Pseudomonadaceae	DNA	N.A.	N.A.	N.A.	N.A.	https://www.jcm.riken.jp/cgi-bin/jcm/jcm_number?JCM=21475	JGD07090	https://dna.brc.riken.jp/DataSheet/JGD07090	202
JCM 20301	Pseudomonas aeruginosa	Bacteria; Pseudomonadati; Pseudomonadota; Gammaproteobacteria; Pseudomonadales; Pseudomonadaceae	DNA	N.A.	N.A.	N.A.	N.A.	https://www.jcm.riken.jp/cgi-bin/jcm/jcm_number?JCM=20301	JGD07094	https://dna.brc.riken.jp/DataSheet/JGD07094	41
JCM 6156	Pseudomonas putida	Bacteria; Pseudomonadati; Pseudomonadota; Gammaproteobacteria; Pseudomonadales; Pseudomonadaceae	DNA	N.A.	N.A.	N.A.	N.A.	https://www.jcm.riken.jp/cgi-bin/jcm/jcm_number?JCM=6156	JGD17445	https://dna.brc.riken.jp/DataSheet/JGD17445	228
JCM 15514	Salinisphaera hydrothermalis	Bacteria; Pseudomonadati; Pseudomonadota; Gammaproteobacteria; Salinisphaerales; Salinisphaeraceae	Culture	701	30	100	4	https://www.jcm.riken.jp/cgi-bin/jcm/jcm_number?JCM=15514	N.A.	N.A.	518
JCM 17795	Galenea microaerophila	Bacteria; Pseudomonadati; Pseudomonadota; Gammaproteobacteria; Thiotrichales; Piscirickettsiaceae	Culture	902	35	100	4	https://www.jcm.riken.jp/cgi-bin/jcm/jcm_number?JCM=17795	N.A.	N.A.	10.3
JCM 12397	Hydrogenovibrio thermophilus	Bacteria; Pseudomonadati; Pseudomonadota; Gammaproteobacteria; Thiotrichales; Piscirickettsiaceae	Culture	413	30	100	1	https://www.jcm.riken.jp/cgi-bin/jcm/jcm_number?JCM=12397	N.A.	N.A.	418
JCM 30760	Thiomicrorhabdus hydrogeniphila	Bacteria; Pseudomonadati; Pseudomonadota; Gammaproteobacteria; Thiotrichales; Piscirickettsiaceae	Culture	1090	25	1000	6	https://www.jcm.riken.jp/cgi-bin/jcm/jcm_number?JCM=30760	N.A.	N.A.	176
JCM 18905	Vibrio sp.	Bacteria; Pseudomonadati; Pseudomonadota; Gammaproteobacteria; Vibrionales; Vibrionaceae	DNA	N.A.	N.A.	N.A.	N.A.	https://www.jcm.riken.jp/cgi-bin/jcm/jcm_number?JCM=18905	JGD12625	https://dna.brc.riken.jp/DataSheet/JGD12625	149
JCM 10831	Hydrogenophilus hirschii	Bacteria; Pseudomonadati; Pseudomonadota; Hydrogenophilia; Hydrogenophilales; Hydrogenophilaceae	Culture	279	60	100	1	https://www.jcm.riken.jp/cgi-bin/jcm/jcm_number?JCM=10831	N.A.	N.A.	61
JCM 16106	Hydrogenophilus islandicus	Bacteria; Pseudomonadati; Pseudomonadota; Hydrogenophilia; Hydrogenophilales; Hydrogenophilaceae	Culture	774	55	100	2	https://www.jcm.riken.jp/cgi-bin/jcm/jcm_number?JCM=16106	N.A.	N.A.	2.68
JCM 9785	Rhodothermus marinus	Bacteria; Pseudomonadati; Rhodothermota; Rhodothermia; Rhodothermales; Rhodothermaceae	DNA	N.A.	N.A.	N.A.	N.A.	https://www.jcm.riken.jp/cgi-bin/jcm/jcm_number?JCM=9785	JGD12124	https://dna.brc.riken.jp/DataSheet/JGD12124	92
JCM 31343	Longimonas haloalkaliphila	Bacteria; Pseudomonadati; Rhodothermota; Rhodothermia; Rhodothermales; Salinibacteraceae	Culture	1140	37	100	8	https://www.jcm.riken.jp/cgi-bin/jcm/jcm_number?JCM=31343	N.A.	N.A.	105
JCM 31342	Natronotalea proteinilytica	Bacteria; Pseudomonadati; Rhodothermota; Rhodothermia; Rhodothermales; Salisaetaceae	Culture	1139	37	100	8	https://www.jcm.riken.jp/cgi-bin/jcm/jcm_number?JCM=31342	N.A.	N.A.	124
JCM 14728	Exilispira thermophila	Bacteria; Pseudomonadati; Spirochaetota; Spirochaetia; Spirochaetales	Culture	622	50	100	6	https://www.jcm.riken.jp/cgi-bin/jcm/jcm_number?JCM=14728	N.A.	N.A.	28.2
JCM 31475	Pleomorphochaeta caudata	Bacteria; Pseudomonadati; Spirochaetota; Spirochaetia; Spirochaetales; Sphaerochaetaceae	Culture	1150	37	100	1	https://www.jcm.riken.jp/cgi-bin/jcm/jcm_number?JCM=31475	N.A.	N.A.	122
JCM 31871	Pleomorphochaeta naphthae	Bacteria; Pseudomonadati; Spirochaetota; Spirochaetia; Spirochaetales; Sphaerochaetaceae	Culture	1172	37	100	2	https://www.jcm.riken.jp/cgi-bin/jcm/jcm_number?JCM=31871	N.A.	N.A.	508
JCM 12856	Spirochaeta dissipatitropha	Bacteria; Pseudomonadati; Spirochaetota; Spirochaetia; Spirochaetales; Spirochaetaceae	Culture	454	35	100	3	https://www.jcm.riken.jp/cgi-bin/jcm/jcm_number?JCM=12856	N.A.	N.A.	264
JCM 30394	Deferrisoma palaeochoriense	Bacteria; Pseudomonadati; Thermodesulfobacteriota; Deferrisomatia; Deferrisomatales; Deferrisomataceae	Culture	1053	60	1000	3	https://www.jcm.riken.jp/cgi-bin/jcm/jcm_number?JCM=30394	N.A.	N.A.	26
JCM 19179	Desulfatiglans parachlorophenolica	Bacteria; Pseudomonadati; Thermodesulfobacteriota; Desulfobacteria; Desulfatiglandales; Desulfatiglandaceae	Culture	981	30	1000	12	https://www.jcm.riken.jp/cgi-bin/jcm/jcm_number?JCM=19179	N.A.	N.A.	104
JCM 14469	Desulfatiferula olefinivorans	Bacteria; Pseudomonadati; Thermodesulfobacteriota; Desulfobacteria; Desulfobacterales; Desulfobacteraceae	Culture	576	35	100	8	https://www.jcm.riken.jp/cgi-bin/jcm/jcm_number?JCM=14469	N.A.	N.A.	24.1
JCM 12294	Desulfocicer niacini	Bacteria; Pseudomonadati; Thermodesulfobacteriota; Desulfobacteria; Desulfobacterales; Desulfobacteraceae	Culture	393	30	10	6	https://www.jcm.riken.jp/cgi-bin/jcm/jcm_number?JCM=12294	N.A.	N.A.	11.1
JCM 16085	Desulfoconvexum algidum	Bacteria; Pseudomonadati; Thermodesulfobacteriota; Desulfobacteria; Desulfobacterales; Desulfobacteraceae	Culture	772	15	100	17	https://www.jcm.riken.jp/cgi-bin/jcm/jcm_number?JCM=16085	N.A.	N.A.	161
JCM 12296	Desulfosarcina cetonica	Bacteria; Pseudomonadati; Thermodesulfobacteriota; Desulfobacteria; Desulfobacterales; Desulfosarcinaceae	DNA	N.A.	N.A.	N.A.	N.A.	https://www.jcm.riken.jp/cgi-bin/jcm/jcm_number?JCM=12296	JGD12590	https://dna.brc.riken.jp/DataSheet/JGD12590	73.4
JCM 39068	Desulfocastanea catecholica	Bacteria; Pseudomonadati; Thermodesulfobacteriota; Desulfobulbia; Desulfobulbales; Desulfobulbaceae	Culture	1257	28	100	35	https://www.jcm.riken.jp/cgi-bin/jcm/jcm_number?JCM=39068	N.A.	N.A.	0.746
JCM 19994	Desulfogranum aggregans	Bacteria; Pseudomonadati; Thermodesulfobacteriota; Desulfobulbia; Desulfobulbales; Desulfobulbaceae	Culture	1034	35	1000	7	https://www.jcm.riken.jp/cgi-bin/jcm/jcm_number?JCM=19994	N.A.	N.A.	594
JCM 14714	Desulfomicrobium aestuarii	Bacteria; Pseudomonadati; Thermodesulfobacteriota; Desulfovibrionia; Desulfovibrionales; Desulfomicrobiaceae	Culture	616	35	100	6	https://www.jcm.riken.jp/cgi-bin/jcm/jcm_number?JCM=14714	N.A.	N.A.	47.2
JCM 14713	Desulfomicrobium salsuginis	Bacteria; Pseudomonadati; Thermodesulfobacteriota; Desulfovibrionia; Desulfovibrionales; Desulfomicrobiaceae	Culture	616	35	100	6	https://www.jcm.riken.jp/cgi-bin/jcm/jcm_number?JCM=14713	N.A.	N.A.	46
JCM 31598	Desulfonatronum parangueonense	Bacteria; Pseudomonadati; Thermodesulfobacteriota; Desulfovibrionia; Desulfovibrionales; Desulfonatronaceae	Culture	1157	35	100	11	https://www.jcm.riken.jp/cgi-bin/jcm/jcm_number?JCM=31598	N.A.	N.A.	13
JCM 13028	Desulfonauticus autotrophicus	Bacteria; Pseudomonadati; Thermodesulfobacteriota; Desulfovibrionia; Desulfovibrionales; Desulfonauticaceae	Culture	471	55	100	3	https://www.jcm.riken.jp/cgi-bin/jcm/jcm_number?JCM=13028	N.A.	N.A.	23.6
JCM 12298	Desulfothermus naphthae	Bacteria; Pseudomonadati; Thermodesulfobacteriota; Desulfovibrionia; Desulfovibrionales; Desulfothermaceae	Culture	397	60	100	7	https://www.jcm.riken.jp/cgi-bin/jcm/jcm_number?JCM=12298	N.A.	N.A.	15.1
JCM 13304	Desulfothermus okinawensis	Bacteria; Pseudomonadati; Thermodesulfobacteriota; Desulfovibrionia; Desulfovibrionales; Desulfothermaceae	DNA	N.A.	N.A.	N.A.	N.A.	https://www.jcm.riken.jp/cgi-bin/jcm/jcm_number?JCM=13304	JGD12574	https://dna.brc.riken.jp/DataSheet/JGD12574	41.6
JCM 16814	Desulfobaculum senezii	Bacteria; Pseudomonadati; Thermodesulfobacteriota; Desulfovibrionia; Desulfovibrionales; Desulfovibrionaceae	Culture	750	37	100	6	https://www.jcm.riken.jp/cgi-bin/jcm/jcm_number?JCM=16814	N.A.	N.A.	93.2
JCM 18546	Desulfocurvus thunnarius	Bacteria; Pseudomonadati; Thermodesulfobacteriota; Desulfovibrionia; Desulfovibrionales; Desulfovibrionaceae	Culture	953	37	100	2	https://www.jcm.riken.jp/cgi-bin/jcm/jcm_number?JCM=18546	N.A.	N.A.	412
JCM 30146	Desulfovibrio biadhensis	Bacteria; Pseudomonadati; Thermodesulfobacteriota; Desulfovibrionia; Desulfovibrionales; Desulfovibrionaceae	Culture	1043	35	100	2	https://www.jcm.riken.jp/cgi-bin/jcm/jcm_number?JCM=30146	N.A.	N.A.	51.8
JCM 12178	Desulfovibrio brasiliensis	Bacteria; Pseudomonadati; Thermodesulfobacteriota; Desulfovibrionia; Desulfovibrionales; Desulfovibrionaceae	DNA	N.A.	N.A.	N.A.	N.A.	https://www.jcm.riken.jp/cgi-bin/jcm/jcm_number?JCM=12178	JGD12589	https://dna.brc.riken.jp/DataSheet/JGD12589	187
JCM 16812	Desulfovibrio simplex	Bacteria; Pseudomonadati; Thermodesulfobacteriota; Desulfovibrionia; Desulfovibrionales; Desulfovibrionaceae	Culture	389	37	100	6	https://www.jcm.riken.jp/cgi-bin/jcm/jcm_number?JCM=16812	N.A.	N.A.	29.8
JCM 15519	Fundidesulfovibrio butyratiphilus	Bacteria; Pseudomonadati; Thermodesulfobacteriota; Desulfovibrionia; Desulfovibrionales; Desulfovibrionaceae	Culture	708	30	1000	6	https://www.jcm.riken.jp/cgi-bin/jcm/jcm_number?JCM=15519	N.A.	N.A.	144
JCM 15971	Halodesulfovibrio oceani subsp. galateae	Bacteria; Pseudomonadati; Thermodesulfobacteriota; Desulfovibrionia; Desulfovibrionales; Desulfovibrionaceae	Culture	765	20	100	7	https://www.jcm.riken.jp/cgi-bin/jcm/jcm_number?JCM=15971	N.A.	N.A.	74.2
JCM 15970	Halodesulfovibrio oceani subsp. oceani	Bacteria; Pseudomonadati; Thermodesulfobacteriota; Desulfovibrionia; Desulfovibrionales; Desulfovibrionaceae	Culture	765	20	100	7	https://www.jcm.riken.jp/cgi-bin/jcm/jcm_number?JCM=15970	N.A.	N.A.	186
JCM 14124	Humidesulfovibrio idahonensis	Bacteria; Pseudomonadati; Thermodesulfobacteriota; Desulfovibrionia; Desulfovibrionales; Desulfovibrionaceae	Culture	389	30	100	6	https://www.jcm.riken.jp/cgi-bin/jcm/jcm_number?JCM=14124	N.A.	N.A.	66
JCM 31065	Maridesulfovibrio salinus	Bacteria; Pseudomonadati; Thermodesulfobacteriota; Desulfovibrionia; Desulfovibrionales; Desulfovibrionaceae	Culture	1117	30	100	2	https://www.jcm.riken.jp/cgi-bin/jcm/jcm_number?JCM=31065	N.A.	N.A.	161
JCM 14635	Megalodesulfovibrio paquesii	Bacteria; Pseudomonadati; Thermodesulfobacteriota; Desulfovibrionia; Desulfovibrionales; Desulfovibrionaceae	Culture	602	37	100	2	https://www.jcm.riken.jp/cgi-bin/jcm/jcm_number?JCM=14635	N.A.	N.A.	200
JCM 14040	Oceanidesulfovibrio marinus	Bacteria; Pseudomonadati; Thermodesulfobacteriota; Desulfovibrionia; Desulfovibrionales; Desulfovibrionaceae	Culture	551	37	100	2	https://www.jcm.riken.jp/cgi-bin/jcm/jcm_number?JCM=14040	N.A.	N.A.	242
JCM 15785	Oleidesulfovibrio vietnamensis	Bacteria; Pseudomonadati; Thermodesulfobacteriota; Desulfovibrionia; Desulfovibrionales; Desulfovibrionaceae	Culture	750	30	1000	4	https://www.jcm.riken.jp/cgi-bin/jcm/jcm_number?JCM=15785	N.A.	N.A.	1040
JCM 30471	Desulfuromonas carbonis	Bacteria; Pseudomonadati; Thermodesulfobacteriota; Desulfuromonadia; Desulfuromonadales; Desulfuromonadaceae	Culture	1062	30	1000	7	https://www.jcm.riken.jp/cgi-bin/jcm/jcm_number?JCM=30471	N.A.	N.A.	332
JCM 12927	Desulfuromonas svalbardensis	Bacteria; Pseudomonadati; Thermodesulfobacteriota; Desulfuromonadia; Desulfuromonadales; Desulfuromonadaceae	Culture	837	14	100	6	https://www.jcm.riken.jp/cgi-bin/jcm/jcm_number?JCM=12927	N.A.	N.A.	41.6
JCM 12926	Desulfuromusa ferrireducens	Bacteria; Pseudomonadati; Thermodesulfobacteriota; Desulfuromonadia; Desulfuromonadales; Desulfuromonadaceae	Culture	463	15	100	10	https://www.jcm.riken.jp/cgi-bin/jcm/jcm_number?JCM=12926	N.A.	N.A.	304
JCM 15764	Geotalea toluenoxydans	Bacteria; Pseudomonadati; Thermodesulfobacteriota; Desulfuromonadia; Geobacterales; Geobacteraceae	DNA	N.A.	N.A.	N.A.	N.A.	https://www.jcm.riken.jp/cgi-bin/jcm/jcm_number?JCM=15764	JGD12596	https://dna.brc.riken.jp/DataSheet/JGD12596	75.2
JCM 16410	Desulfosoma profundi	Bacteria; Pseudomonadati; Thermodesulfobacteriota; Syntrophobacteria; Syntrophobacterales; Syntrophobacteraceae	Culture	796	55	100	8	https://www.jcm.riken.jp/cgi-bin/jcm/jcm_number?JCM=16410	N.A.	N.A.	31.8
JCM 14805	Prosthecobacter fluviatilis	Bacteria; Pseudomonadati; Verrucomicrobiota; Verrucomicrobiia; Verrucomicrobiales; Verrucomicrobiaceae	Culture	631	30	100	2	https://www.jcm.riken.jp/cgi-bin/jcm/jcm_number?JCM=14805	N.A.	N.A.	478
JCM 15963	Rhabdothermus arcticus	Bacteria; Thermotogati; Deinococcota; Deinococci; Thermales; Thermaceae	Culture	764	65	100	3	https://www.jcm.riken.jp/cgi-bin/jcm/jcm_number?JCM=15963	N.A.	N.A.	340
JCM 11602	Thermus brockianus	Bacteria; Thermotogati; Deinococcota; Deinococci; Thermales; Thermaceae	Culture	276	65	100	3	https://www.jcm.riken.jp/cgi-bin/jcm/jcm_number?JCM=11602	N.A.	N.A.	666
JCM 12314	Thermus kawarayensis	Bacteria; Thermotogati; Deinococcota; Deinococci; Thermales; Thermaceae	DNA	N.A.	N.A.	N.A.	N.A.	https://www.jcm.riken.jp/cgi-bin/jcm/jcm_number?JCM=12314	JGD12573	https://dna.brc.riken.jp/DataSheet/JGD12573	43.8
JCM 11956	Vulcanithermus mediatlanticus	Bacteria; Thermotogati; Deinococcota; Deinococci; Thermales; Thermaceae	Culture	366	70	100	1	https://www.jcm.riken.jp/cgi-bin/jcm/jcm_number?JCM=11956	N.A.	N.A.	83.4
JCM 19320	Aminobacterium thunnarium	Bacteria; Thermotogati; Synergistota; Synergistia; Synergistales; Aminobacteriaceae	Culture	989	37	100	3	https://www.jcm.riken.jp/cgi-bin/jcm/jcm_number?JCM=19320	N.A.	N.A.	542
JCM 17151	Lactivibrio alcoholicus	Bacteria; Thermotogati; Synergistota; Synergistia; Synergistales; Aminobacteriaceae	Culture	835	37	100	8	https://www.jcm.riken.jp/cgi-bin/jcm/jcm_number?JCM=17151	N.A.	N.A.	63.4
JCM 18154	Mesotoga infera	Bacteria; Thermotogati; Thermotogota; Thermotogae; Kosmotogales; Kosmotogaceae	Culture	926	45	100	3	https://www.jcm.riken.jp/cgi-bin/jcm/jcm_number?JCM=18154	N.A.	N.A.	220
JCM 17210	Defluviitoga tunisiensis	Bacteria; Thermotogati; Thermotogota; Thermotogae; Petrotogales; Petrotogaceae	Culture	844	55	100	4	https://www.jcm.riken.jp/cgi-bin/jcm/jcm_number?JCM=17210	N.A.	N.A.	173
JCM 30566	Marinitoga arctica	Bacteria; Thermotogati; Thermotogota; Thermotogae; Petrotogales; Petrotogaceae	Culture	1066	65	100	2	https://www.jcm.riken.jp/cgi-bin/jcm/jcm_number?JCM=30566	N.A.	N.A.	16.3
JCM 13303	Marinitoga okinawensis	Bacteria; Thermotogati; Thermotogota; Thermotogae; Petrotogales; Petrotogaceae	Culture	494	55	100	3	https://www.jcm.riken.jp/cgi-bin/jcm/jcm_number?JCM=13303	N.A.	N.A.	102
