# Supplementary material
Source: HighWire-hosted journal article supplement (doi:10.1101/gr.281026.125)
Supplement: Supplemental_Table_S2.xlsx [file Supplemental_Table_S2.xlsx]

## Sheet: TableS2
Supplemental Table S2. Genomic features of the 351 strains.
JCM number	Scientific name	Type/non-type strain	Taxonomy (ICNP-based)	Aerobic/ Microaerophilic/ Anaerobic	Accession number reported in this study	Accession number of previously reported genomes (250425)	Coverage (PacBio)	Coverage (Nanopore)	Coverage (MiSeq/NextSeq)	Assembly software	Assembly size (bp)	GC content (%)	Complete/ Draft	Number of total contigs	Number of circular contigs	Number of circular primary replicon	Number of circular secondary replicons	Number of plasmids detected by geNomerd	Number of plasmids detected by mob-suite	Number of virus/phage detected by geNomerd	Number of virus/phage detected by Virsorter2	N50	L50	Longest contigs (bp)	Number of CDSs	Average Protein Length (a.a.)	Coding Ratio (%)	Number of rRNAs	5S	16S	23S	Number of tRNAs	Number of CRISPRs	Completeness (general) by CheckM2	Completeness (speci) by CheckM2	contamination by CheckM2	Completeness by CheckM	contamination by CheckM	Strain heterogeneity by CheckM
JCM 15760	Haloarcula argentinensis	Non-type	Archaea; Methanobacteriati; Halobacteriota; Halobacteria; Halobacteriales; Haloarculaceae	Aerobic	AP043795, AP043796, AP043797, AP043798, AP043799, AP043800	BAABDY010000000	86.349	N.A.	N.A.	Flye	4040500	61.3	Complete	6	6	1	5	3	0	1	1	3087279	1	3087279	4124	284	87	10	4	3	3	70	6	99.31	99.97	0.21	99.93	0.4	0
JCM 17269	Halovenus rubra	Type	Archaea; Methanobacteriati; Halobacteriota; Halobacteria; Halobacteriales; Haloarculaceae	Aerobic	AP043837, AP043838	JAODIY010000000	116.156	N.A.	N.A.	Flye	3605887	55.22	Complete	2	2	1	1	1	0	0	0	3341683	1	3341683	3516	301.1	88.1	6	2	2	2	50	2	97.76	98.81	1.01	97.25	0.4	0
JCM 19908	Halobacterium rubrum	Type	Archaea; Methanobacteriati; Halobacteriota; Halobacteria; Halobacteriales; Halobacteriaceae	Aerobic	AP043890, AP043891	Not reported	55.8041	N.A.	N.A.	Flye	3058946	68.57	Complete	2	2	1	1	0	0	0	0	2897195	1	2897195	3211	283.8	89.4	6	2	2	2	49	2	100	99.99	0.25	99.5	1.28	0
JCM 11890	Halalkalicoccus tibetensis	Type	Archaea; Methanobacteriati; Halobacteriota; Halobacteria; Halobacteriales; Halococcaceae	Aerobic	AP043744, AP043745, AP043746, AP043747, AP043748	JBBMXV010000000	37.3317	N.A.	N.A.	Revio	3585449	64.16	Complete	5	4	1	3	4	0	0	0	2933625	1	2933625	3724	270.2	84.2	3	1	1	1	49	5	98.57	96.78	1.07	98.65	0.85	0
JCM 30029	Halobium salinum	Type	Archaea; Methanobacteriati; Halobacteriota; Halobacteria; Halobacteriales; Haloferacaceae	Aerobic	AP043926, AP043927, AP043928, AP043929	JAODIW010000000	68.7722	N.A.	N.A.	Flye	4440065	67.65	Complete	4	4	1	3	1	0	0	0	3693528	1	3693528	4347	287.7	84.5	6	2	2	2	51	4	98.83	99.36	1.59	98.61	2.31	0
JCM 30237	Halolamina litorea	Type	Archaea; Methanobacteriati; Halobacteriota; Halobacteria; Halobacteriales; Haloferacaceae	Aerobic	BAAIGU000000000	JANHGR010000000	N.A.	N.A.	866.431	Unicycler	3005314	68.27	Draft	12	1	0	1	0	0	0	0	677894	2	902608	3057	295.2	90.1	3	1	1	1	45	12	99.61	97.71	0.86	96.64	1.9	0
JCM 18549	Halolamina salina	Type	Archaea; Methanobacteriati; Halobacteriota; Halobacteria; Halobacteriales; Haloferacaceae	Aerobic	BAAIGE000000000	Not reported	140.585	N.A.	N.A.	Hybracter	2830580	68.12	Draft	4	1	0	1	1	0	0	0	2651269	1	2651269	2886	291.7	89.2	6	2	2	2	46	4	99.6	98.82	0.37	96.67	0.76	0
JCM 30442	Haloparvum alkalitolerans	Type	Archaea; Methanobacteriati; Halobacteriota; Halobacteria; Halobacteriales; Haloferacaceae	Aerobic	AP043936, AP043937, AP043938	BAAGXR010000000	69.0996	N.A.	N.A.	Flye	3143340	69.04	Complete	3	3	1	2	1	0	0	0	2657314	1	2657314	3024	299.5	86.5	9	3	3	3	50	3	98.98	99.74	2.28	98.54	0.13	0
JCM 17506	Halopelagius fulvigenes	Type	Archaea; Methanobacteriati; Halobacteriota; Halobacteria; Halobacteriales; Haloferacaceae	Aerobic	AP043840, AP043841, AP043842, AP043843, AP043844, AP043845, AP043846, AP043847	JBHSXH010000000	16.5478	N.A.	N.A.	Flye	3938079	65.77	Complete	8	6	1	5	2	0	1	3	2905174	1	2905174	3998	280.8	85.5	6	2	2	2	50	8	97.04	99.65	2.17	99.57	0.1	50
JCM 18641	Halopenitus salinus	Type	Archaea; Methanobacteriati; Halobacteriota; Halobacteria; Halobacteriales; Haloferacaceae	Aerobic	AP043852, AP043853, AP043854	Not reported	78.2026	N.A.	N.A.	Flye	3007801	65.1	Complete	3	3	1	2	2	0	0	0	2632838	1	2632838	2984	291.4	86.7	6	2	2	2	52	3	100	99.69	2.27	98.6	0.14	0
JCM 17092	Haloplanus litoreus	Type	Archaea; Methanobacteriati; Halobacteriota; Halobacteria; Halobacteriales; Haloferacaceae	Aerobic	BAAIEO000000000	Not reported	N.A.	N.A.	804.088	Unicycler	3336789	66.16	Draft	41	0	0	2	7	0	1	2	133272	8	393234	3411	286.4	87.8	0	0	0	0	46	41	98.17	99.95	1.09	99.57	1.17	0
JCM 14265	Halorubrum ejinorense	Type	Archaea; Methanobacteriati; Halobacteriota; Halobacteria; Halobacteriales; Haloferacaceae	Aerobic	AP043776, AP043777	BAAADQ010000000	143.243	N.A.	N.A.	Flye	3412359	67.57	Complete	2	2	1	1	1	0	1	1	3145013	1	3145013	3343	293.5	86.2	6	2	2	2	50	2	99.8	99.98	1.27	99.76	0.38	0
JCM 17823	Halorubrum gandharaense	Type	Archaea; Methanobacteriati; Halobacteriota; Halobacteria; Halobacteriales; Haloferacaceae	Aerobic	BAAIET000000000	Not reported	117.264	N.A.	N.A.	Hybracter	3156684	66.49	Draft	3	1	0	1	0	0	0	0	1884723	1	1884723	3043	293.6	84.9	6	2	2	2	49	3	99.47	99.75	1.08	98.61	0.76	0
JCM 18237	Halorubrum luteum	Type	Archaea; Methanobacteriati; Halobacteriota; Halobacteria; Halobacteriales; Haloferacaceae	Aerobic	BAAIGT000000000	Not reported	102.504	N.A.	N.A.	Hybracter	3239089	64.29	Complete	3	3	1	2	1	0	0	0	3159181	1	3159181	3157	295.2	86.3	6	2	2	2	52	3	98.02	99.66	1.12	99	0	0
JCM 30955	Halorubrum pallidum	Type	Archaea; Methanobacteriati; Halobacteriota; Halobacteria; Halobacteriales; Haloferacaceae	Aerobic	AP043944, AP043945	BAAHCE010000000	67.2978	N.A.	N.A.	Flye	2882457	65.17	Complete	2	2	1	1	1	0	0	0	2559470	1	2559470	2856	292	86.8	6	2	2	2	50	2	99.5	99.67	2.3	98.92	0.76	0
JCM 11889	Halorubrum tibetense	Type	Archaea; Methanobacteriati; Halobacteriota; Halobacteria; Halobacteriales; Haloferacaceae	Aerobic	AP043742, AP043743	Not reported	59.3789	N.A.	N.A.	Flye	3180477	65.82	Complete	2	2	1	1	1	0	0	0	3154754	1	3154754	3061	300.9	86.9	6	2	2	2	61	2	97.35	98.86	0.71	99.76	0.76	0
JCM 31271	Halorubrum trueperi	Type	Archaea; Methanobacteriati; Halobacteriota; Halobacteria; Halobacteriales; Haloferacaceae	Aerobic	BAAIGD000000000	Not reported	51.8914	N.A.	N.A.	Hybracter	3769829	63.81	Complete	4	4	1	3	3	0	1	1	2819537	1	2819537	3767	278.9	83.6	6	2	2	2	50	4	99.42	99.91	1.28	99.11	0	0
JCM 30665	Halorubrum yunnanense	Type	Archaea; Methanobacteriati; Halobacteriota; Halobacteria; Halobacteriales; Haloferacaceae	Aerobic	AP043939, AP043940, AP043941, AP043942	JAODIX010000000	80.8076	N.A.	N.A.	Flye	3137943	67.32	Complete	4	4	1	3	2	0	0	0	2832729	1	2832729	3111	281.8	83.8	6	2	2	2	49	4	98.63	99.39	0.14	99	0.38	0
JCM 18642	Haloarchaeobius amylolyticus	Type	Archaea; Methanobacteriati; Halobacteriota; Halobacteria; Halobacteriales; Halorubellaceae	Aerobic	AP043855, AP043856, AP043857, AP043858	JANHDH010000000	2.57539	1018.91	N.A.	Flye	4580333	66.94	Complete	4	4	1	3	2	0	0	0	3500527	1	3500527	4529	295.5	87.6	3	1	1	1	53	4	99.27	99.97	1.93	98.85	0.4	100
JCM 17117	Halorubellus litoreus	Type	Archaea; Methanobacteriati; Halobacteriota; Halobacteria; Halobacteriales; Halorubellaceae	Aerobic	AP043834, AP043835, AP043836	JAZAQL010000000	71.4027	N.A.	N.A.	Flye	4597159	67.63	Complete	3	3	1	2	1	0	1	1	3566981	1	3566981	4375	304.8	87	6	2	2	2	51	3	98.51	99.97	2.86	98.8	0.8	50
JCM 19583	Halopiger thermotolerans	Type	Archaea; Methanobacteriati; Halobacteriota; Halobacteria; Halobacteriales; Natrialbaceae	Aerobic	BAAIEU000000000	BAAHCC010000000	35.1169	N.A.	N.A.	Hybracter	4150957	66.32	Draft	4	1	0	1	0	0	1	1	2558484	1	2558484	4019	293.6	85.3	10	4	3	3	60	4	100	99.93	0.47	99.49	0	0
JCM 16592	Halostagnicola alkaliphila	Type	Archaea; Methanobacteriati; Halobacteriota; Halobacteria; Halobacteriales; Natrialbaceae	Aerobic	AP043824, AP043825, AP043826, AP043827	Not reported	16.6227	N.A.	N.A.	Flye	4895172	59.54	Complete	4	3	1	2	1	0	0	1	3320955	1	3320955	4779	286.4	83.9	9	4	2	3	46	4	99.01	99.99	3.52	99.05	1.2	0
JCM 18750	Halostagnicola bangensis	Type	Archaea; Methanobacteriati; Halobacteriota; Halobacteria; Halobacteriales; Natrialbaceae	Aerobic	BAAIGG000000000	Not reported	86.4285	N.A.	N.A.	Hybracter	4521998	59.52	Draft	5	2	0	2	1	0	0	0	3280785	1	3280785	4426	282.9	83.1	10	4	2	4	46	5	98.79	99.72	2.86	99.33	4	96
JCM 9743	Natrinema sp.	Non-type	Archaea; Methanobacteriati; Halobacteriota; Halobacteria; Halobacteriales; Natrialbaceae	Aerobic	BAAIHA000000000	Not reported	N.A.	N.A.	205.343	Unicycler	3915466	63.84	Draft	153	0	0	0	23	0	1	6	59407	23	156752	3784	279.4	81	5	4	1	0	49	153	99.17	99.79	0.27	99.24	0.13	0
JCM 31939	Natronobiforma cellulositropha	Type	Archaea; Methanobacteriati; Halobacteriota; Halobacteria; Halobacteriales; Natrialbaceae	Aerobic	AP043950	JANZXN010000000	39.4562	N.A.	N.A.	Revio	3826460	65.41	Complete	1	1	1	0	0	0	0	0	3826460	1	3826460	3653	303.2	86.8	6	2	2	2	47	1	97.65	96.81	0.02	99.25	0	0
JCM 16328	Natronoarchaeum mannanilyticum	Type	Archaea; Methanobacteriati; Halobacteriota; Halobacteria; Halobacteriales; Natronoarchaeaceae	Aerobic	AP043812, AP043813, AP043814	BAAADV010000000	61.4824	N.A.	N.A.	Flye	3578268	66.74	Complete	3	3	1	2	1	0	0	0	3191313	1	3191313	3559	289.1	86.3	9	3	3	3	49	3	99.79	95.76	1.07	98.33	0.87	66.67
JCM 19597	Salinarchaeum chitinilyticum	Type	Archaea; Methanobacteriati; Halobacteriota; Halobacteria; Halobacteriales; Natronoarchaeaceae	Aerobic	AP043888	BAAHCD010000000	91.6636	N.A.	N.A.	Flye	3176664	66.27	Complete	1	1	1	0	0	0	0	0	3176664	1	3176664	3037	297.3	85.3	3	1	1	1	46	1	98.88	98.86	0.28	97.13	0.4	0
JCM 15416	Methanobacterium flexile	Type	Archaea; Methanobacteriati; Methanobacteriota; Methanobacteria; Methanobacteriales; Methanobacteriaceae	Anaerobic	AP042398	Not reported	390.714	N.A.	N.A.	Flye	2264390	34.5	Complete	1	1	1	0	0	0	0	0	2264390	1	2264390	2192	282	81.9	7	3	2	2	39	1	98.79	99.96	0.42	100	0	0
JCM 15797	Methanobacterium kanagiense	Type	Archaea; Methanobacteriati; Methanobacteriota; Methanobacteria; Methanobacteriales; Methanobacteriaceae	Anaerobic	AP042396	Not reported	99.0825	N.A.	N.A.	Flye	2131673	37.81	Complete	1	1	1	0	0	0	0	0	2131673	1	2131673	2159	284.6	86.5	3	1	1	1	41	1	97.95	99.84	0.02	99.2	0	0
JCM 15415	Methanobacterium movens	Type	Archaea; Methanobacteriati; Methanobacteriota; Methanobacteria; Methanobacteriales; Methanobacteriaceae	Anaerobic	BAAHXG000000000	Not reported	N.A.	701.154	1445.23	Hybracter	2224811	36.32	Draft	2	0	0	0	0	0	0	0	2202595	1	2202595	2184	292.9	86.3	7	3	2	2	40	2	100	99.94	0.13	100	0	0
JCM 18470	Methanobacterium movilense	Type	Archaea; Methanobacteriati; Methanobacteriota; Methanobacteria; Methanobacteriales; Methanobacteriaceae	Anaerobic	AP042378	Not reported	81.1581	N.A.	N.A.	Flye	3209112	33.06	Complete	1	1	1	0	0	0	0	0	3209112	1	3209112	3153	272.5	80.3	7	3	2	2	40	1	98.64	100	2.23	99.2	0.8	0
JCM 10723	Methanothermus sociabilis	Type	Archaea; Methanobacteriati; Methanobacteriota; Methanobacteria; Methanobacteriales; Methanothermaceae	Anaerobic	AP042467	Not reported	35.8007	N.A.	N.A.	Flye	1265941	31.59	Complete	1	1	1	0	0	0	0	0	1265941	1	1265941	1313	301.4	93.8	6	2	2	2	41	1	99.23	99.85	0.18	100	0	0
JCM 17393	Methanothermobacter crinale	Type	Archaea; Methanobacteriati; Methanobacteriota; Methanobacteria; Methanobacteriales; Methanothermobacteraceae	Anaerobic	AP042450, AP042449	Not reported	N.A.	1140.6	N.A.	Flye	1566431	40.49	Complete	2	2	1	1	0	0	0	0	1521583	1	1521583	1662	276.8	88.1	3	1	1	1	41	2	100	100	0.07	100	0.8	0
JCM 11886	Methanocaldococcus indicus	Type	Archaea; Methanobacteriati; Methanobacteriota; Methanococci; Methanococcales; Methanocaldococcaceae	Anaerobic	AP042383	Not reported	27.272	N.A.	N.A.	Flye	1414442	28.22	Complete	1	1	1	0	0	0	0	0	1414442	1	1414442	1547	283.1	92.9	6	2	2	2	36	1	98.03	99.07	0	99.52	0	0
JCM 10627	Methanocalculus pumilus	Type	Archaea; Methanobacteriati; Methanobacteriota; Methanomicrobia; Methanomicrobiales; Methanocalculaceae	Anaerobic	AP042393	Not reported	161.891	N.A.	N.A.	Flye	2143944	51.01	Complete	1	1	1	0	0	0	0	0	2143944	1	2143944	2189	296.5	90.8	6	2	2	2	50	1	98.53	99.73	0.28	99.35	0	0
JCM 10550	Methanogenium cariaci	Type	Archaea; Methanobacteriati; Methanobacteriota; Methanomicrobia; Methanomicrobiales; Methanomicrobiaceae	Anaerobic	BAAIGF000000000	BBBG00000000	N.A.	8.64368	947.298	Unicycler	2661990	51.53	Draft	29	0	0	0	0	0	1	1	288619	4	625854	2531	305.8	87.2	2	1	1	0	47	29	98.29	97.83	0.91	99.02	1.31	0
JCM 11281	Methanosarcina baltica	Type	Archaea; Methanobacteriati; Methanobacteriota; Methanomicrobia; Methanosarcinales; Methanosarcinaceae	Anaerobic	AP042463, AP042462	Not reported	138.716	N.A.	N.A.	Flye	3739569	44.99	Complete	2	2	1	1	0	0	0	0	3669817	1	3669817	3167	307.2	78	13	5	4	4	60	2	99.56	98.06	0.07	100	0	0
JCM 15540	Methanosarcina subterranea	Type	Archaea; Methanobacteriati; Methanobacteriota; Methanomicrobia; Methanosarcinales; Methanosarcinaceae	Anaerobic	AP042426	Not reported	N.A.	249.525	N.A.	Flye	5061919	41.18	Complete	1	1	1	0	0	0	0	0	5061919	1	5061919	4326	286.3	73.4	9	3	3	3	62	1	97.36	99.98	1.5	99.18	0.65	0
JCM 13384	Palaeococcus helgesonii	Type	Archaea; Methanobacteriati; Methanobacteriota; Thermococci; Thermococcales; Thermococcaceae	Anaerobic	AP042474	Not reported	19.0629	N.A.	N.A.	Flye	1954540	47.01	Complete	1	1	1	0	0	0	0	0	1954540	1	1954540	2091	283.2	90.9	4	2	1	1	46	1	98.89	99.69	0.9	100	0.99	0
JCM 8421	Pyrococcus woesei	Type	Archaea; Methanobacteriati; Methanobacteriota; Thermococci; Thermococcales; Thermococcaceae	Anaerobic	AP042435	Not reported	79.8465	N.A.	N.A.	Flye	1856505	40.71	Complete	1	1	1	0	0	0	0	0	1856505	1	1856505	2005	283.8	91.9	4	2	1	1	46	1	100	99.69	0.17	99.5	0	0
JCM 10828	Thermococcus aegaeus	Type	Archaea; Methanobacteriati; Methanobacteriota; Thermococci; Thermococcales; Thermococcaceae	Anaerobic	AP042464	Not reported	208.205	1.86633	793.74	Flye	1913926	42.96	Complete	1	1	1	0	0	0	0	0	1913926	1	1913926	2066	284.4	92.1	4	2	1	1	46	1	95.94	99.97	0.95	98.51	0.99	0
JCM 16138	Thermococcus atlanticus	Type	Archaea; Methanobacteriati; Methanobacteriota; Thermococci; Thermococcales; Thermococcaceae	Anaerobic	BAAHXX000000000	Not reported	10.6832	N.A.	N.A.	Hybracter	2304791	50.6	Draft	2	1	0	1	0	0	0	0	2294766	1	2294766	2466	284.7	91.4	4	2	1	1	47	2	98.92	99.62	1.34	100	0.99	50
JCM 12540	Thermococcus coalescens	Type	Archaea; Methanobacteriati; Methanobacteriota; Thermococci; Thermococcales; Thermococcaceae	Anaerobic	AP043764	Not reported	5.41489	235.554	N.A.	Flye	2134446	54.28	Complete	1	1	1	0	0	0	0	0	2134446	1	2134446	2308	282.4	91.6	4	2	1	1	46	1	97.75	99.64	0.28	100	0	0
JCM 10128	Thermococcus fumicolans	Type	Archaea; Methanobacteriati; Methanobacteriota; Thermococci; Thermococcales; Thermococcaceae	Anaerobic	AP042424	Not reported	14.1627	N.A.	N.A.	Revio	1961496	55.54	Complete	1	1	1	0	0	0	0	0	1961496	1	1961496	2156	280.6	92.5	4	2	1	1	46	1	96.24	99.76	0.32	100	0.25	0
JCM 11825	Thermococcus marinus	Type	Archaea; Methanobacteriati; Methanobacteriota; Thermococci; Thermococcales; Thermococcaceae	Anaerobic	AP042417	Not reported	41.9027	N.A.	N.A.	Flye	2082156	53.74	Complete	1	1	1	0	0	0	0	0	2082156	1	2082156	2272	278.4	91.1	4	2	1	1	46	1	99.63	99.83	0.22	100	0	0
JCM 16307	Thermococcus prieurii	Type	Archaea; Methanobacteriati; Methanobacteriota; Thermococci; Thermococcales; Thermococcaceae	Anaerobic	BAAHYH000000000	Not reported	8.40785	N.A.	N.A.	Hybracter	2138418	54.4	Draft	3	1	0	1	0	0	0	0	1553673	1	1553673	2332	280.3	91.7	4	2	1	1	46	3	97.41	99.81	0.44	99.5	0	0
JCM 11816	Thermococcus sp.	Non-type	Archaea; Methanobacteriati; Methanobacteriota; Thermococci; Thermococcales; Thermococcaceae	Anaerobic	AP043741	Not reported	80.6735	N.A.	N.A.	Flye	2096235	51.87	Complete	1	1	1	0	0	0	0	0	2096235	1	2096235	2297	278.7	91.6	4	2	1	1	48	1	98.97	99.94	0.11	100	0	0
JCM 10985	Thermococcus waiotapuensis	Type	Archaea; Methanobacteriati; Methanobacteriota; Thermococci; Thermococcales; Thermococcaceae	Anaerobic	AP042429	JAVDZE010000000	55.545	N.A.	N.A.	Flye	1806822	53.43	Complete	1	1	1	0	0	0	0	0	1806822	1	1806822	1948	281.7	91.1	4	2	1	1	46	1	98.23	99.92	0.08	100	0	0
JCM 13583	Thermogymnomonas acidicola	Type	Archaea; Methanobacteriati; Thermoplasmatota; Thermoplasmata; Thermoplasmatales	Aerobic	AP042465	BBCP00000000,BMNY01000000	1.30138	141.275	N.A.	Flye	1729104	55.87	Complete	1	1	1	0	0	0	0	0	1729104	1	1729104	1701	304.1	89.7	3	1	1	1	46	1	95.69	98.4	0.35	98.75	0.81	0
JCM 11320	Acidilobus aceticus	Type	Archaea; Thermoproteati; Thermoproteota; Thermoprotei; Acidilobales; Acidilobaceae	Anaerobic	AP042407	Not reported	26.6169	N.A.	N.A.	Flye	1494469	57.1	Complete	1	1	1	0	0	0	0	0	1494469	1	1494469	1491	304.4	91.1	3	1	1	1	46	1	97.89	99.97	0.46	99.37	0	0
JCM 13516	Caldococcus noboribetus	Type	Archaea; Thermoproteati; Thermoproteota; Thermoprotei; Desulfurococcales	Anaerobic	AP042475	Not reported	N.A.	205.484	1222.45	Flye	1517127	56.16	Complete	1	1	1	0	0	0	0	0	1517127	1	1517127	1573	290.3	90.3	3	1	1	1	46	1	95.77	97.44	0.07	99.33	0.63	0
JCM 10135	Stetteria hydrogenophila	Type	Archaea; Thermoproteati; Thermoproteota; Thermoprotei; Desulfurococcales; Desulfurococcaceae	Anaerobic	BAAHYL000000000	Not reported	13.0763	N.A.	N.A.	Hybracter	1356520	64.38	Draft	2	0	0	0	0	0	0	0	716513	1	716513	1348	296.7	88.5	2	0	1	1	46	2	96.88	97.28	0.02	99.37	0.63	0
JCM 10309	Sulfophobococcus zilligii	Type	Archaea; Thermoproteati; Thermoproteota; Thermoprotei; Desulfurococcales; Desulfurococcaceae	Anaerobic	AP042406	Not reported	N.A.	129.662	1720.33	Flye	1402993	38.88	Complete	1	1	1	0	0	0	0	0	1402993	1	1402993	1520	280.6	91.2	3	1	1	1	46	1	98.48	98.67	0.15	98.42	0.63	0
JCM 11597	Thermodiscus maritimus	Type	Archaea; Thermoproteati; Thermoproteota; Thermoprotei; Desulfurococcales; Desulfurococcaceae	Anaerobic	AP042434	Not reported	N.A.	276.721	2351.35	Flye	1473551	53.25	Complete	1	1	1	0	0	0	0	0	1473551	1	1473551	1590	279.5	90.5	2	0	1	1	46	1	96.59	99.07	0.9	98.73	0.63	0
JCM 9392	Pyrodictium brockii	Type	Archaea; Thermoproteati; Thermoproteota; Thermoprotei; Desulfurococcales; Pyrodictiaceae	Anaerobic	AP042401	Not reported	N.A.	69.2215	2036.23	Flye	1639937	63.56	Complete	1	1	1	0	0	0	0	0	1639937	1	1639937	1700	285.1	88.7	2	0	1	1	46	1	100	99.9	0	98.73	1.27	0
JCM 10088	Thermocladium modestius	Type	Archaea; Thermoproteati; Thermoproteota; Thermoprotei; Thermoproteales; Thermocladiaceae	Anaerobic	AP043731	BBBF00000000,BMNL00000000	N.A.	3732.25	N.A.	Flye	1903084	52.42	Complete	1	1	1	0	0	0	0	0	1903084	1	1903084	1933	286.6	87.3	3	1	1	1	45	1	96.62	96.08	0.03	98.65	0	0
JCM 9190	Pyrobaculum organotrophum	Type	Archaea; Thermoproteati; Thermoproteota; Thermoprotei; Thermoproteales; Thermoproteaceae	Anaerobic	AP042430	Not reported	11.2258	N.A.	N.A.	Flye	1890320	49.48	Complete	1	1	1	0	0	0	0	0	1890320	1	1890320	2290	247.1	89.8	3	1	1	1	46	1	98.84	100	0.1	100	0	0
JCM 17229	Thermoproteus thermophilus	Type	Archaea; Thermoproteati; Thermoproteota; Thermoprotei; Thermoproteales; Thermoproteaceae	Anaerobic	AP042466	Not reported	1122.81	N.A.	N.A.	Flye	1755389	57.4	Complete	1	1	1	0	0	0	0	0	1755389	1	1755389	1988	270.5	91.9	2	0	1	1	46	1	98.38	99.9	0.12	100	0.74	0
JCM 14467	Vulcanisaeta sp.	Non-type	Archaea; Thermoproteati; Thermoproteota; Thermoprotei; Thermoproteales; Thermoproteaceae	Anaerobic	BAAIFK000000000	BBDM01000000	N.A.	17.6305	1180.34	Unicycler	2448134	46.78	Draft	6	0	0	0	0	0	0	0	1353555	1	1353555	2689	273.1	90	2	0	1	1	48	6	97.66	99.98	0.12	99.26	0.37	100
JCM 16159	Vulcanisaeta sp.	Non-type	Archaea; Thermoproteati; Thermoproteota; Thermoprotei; Thermoproteales; Thermoproteaceae	Anaerobic	AP043811	BBDN00000000	1.99218	383.786	N.A.	Flye	2256912	45.34	Complete	1	1	1	0	0	0	0	0	2256912	1	2256912	2594	260.9	90	2	0	1	1	46	1	97.72	99.07	0.26	99.26	0	0
JCM 16161	Vulcanisaeta sp.	Non-type	Archaea; Thermoproteati; Thermoproteota; Thermoprotei; Thermoproteales; Thermoproteaceae	Anaerobic	BAAIFL000000000	BBDO01000000	10.4968	N.A.	N.A.	Hybracter	2304525	46.03	Draft	2	0	0	0	0	0	0	0	2291514	1	2291514	2588	269.8	90.9	2	0	1	1	48	2	97.31	99.9	1.7	99.26	0.74	0
JCM 1254	Bifidobacterium bifidum	Non-type	Bacteria; Bacillati; Actinomycetota; Actinomycetes; Bifidobacteriales; Bifidobacteriaceae	Anaerobic	AP043696	BBBT00000000	22.6674	N.A.	N.A.	Flye	2245719	62.75	Complete	1	1	1	0	0	0	1	1	2245719	1	2245719	1821	353.1	85.9	6	0	3	3	54	1	99.78	99.94	0.14	99.54	0	0
JCM 1272	Bifidobacterium longum subsp. infantis	Non-type	Bacteria; Bacillati; Actinomycetota; Actinomycetes; Bifidobacteriales; Bifidobacteriaceae	Anaerobic	AP043697	Not reported	26.1824	N.A.	N.A.	Flye	2674325	59.74	Complete	1	1	1	0	0	1	0	0	2674325	1	2674325	2301	332.7	85.9	8	0	4	4	57	1	99.19	99.98	0.5	100	0.92	0
JCM 9957	Kineosporia succinea	Type	Bacteria; Bacillati; Actinomycetota; Actinomycetes; Kineosporiales; Kineosporiaceae	Aerobic	BAAIFA000000000	BBIE00000000	8.8323	N.A.	N.A.	Hybracter	8101097	70.66	Draft	21	0	0	0	2	0	5	4	522473	5	1906286	7084	337	88.4	21	7	7	7	65	21	98.16	100	3.32	99.19	1.35	0
JCM 13580	Streptomyces drozdowiczii	Type	Bacteria; Bacillati; Actinomycetota; Actinomycetes; Kitasatosporales; Streptomycetaceae	Aerobic	BAAIFC000000000	BAAAVR010000000,BBFQ00000000	13.3181	N.A.	N.A.	Hybracter	7361020	71.98	Draft	3	0	0	0	0	0	0	0	6815119	1	6815119	6346	345	89.2	18	6	6	6	68	3	99.26	99.99	0.2	100	0.53	0
JCM 12681	Streptomyces mexicanus	Type	Bacteria; Bacillati; Actinomycetota; Actinomycetes; Kitasatosporales; Streptomycetaceae	Aerobic	BAAIGN000000000	BAAAVP010000000,BBGQ00000000	12.9531	N.A.	N.A.	Hybracter	8193564	72.55	Draft	2	0	0	0	1	1	1	0	8175958	1	8175958	7207	325.9	86	18	6	6	6	68	2	98.76	99.99	0.48	99.89	0.25	0
JCM 4814	Streptomyces phaeofaciens	Type	Bacteria; Bacillati; Actinomycetota; Actinomycetes; Kitasatosporales; Streptomycetaceae	Aerobic	BAAIGX000000000	BBHU00000000	12.0198	N.A.	N.A.	Hybracter	10631713	71.71	Draft	12	0	0	0	5	1	1	1	2809800	2	4721721	9189	336.6	87.3	18	6	6	6	80	12	99.79	100	0.9	100	0.89	0
JCM 4914	Streptomyces platensis subsp. malvinus	Type	Bacteria; Bacillati; Actinomycetota; Actinomycetes; Kitasatosporales; Streptomycetaceae	Aerobic	BAAIGJ000000000	Not reported	21.0891	N.A.	N.A.	Hybracter	8553799	71.72	Complete	3	0	0	0	2	1	0	0	8353080	1	8353080	7392	328.9	85.3	18	6	6	6	68	3	100	100	2.6	99.88	2.86	20
JCM 18897	Streptomyces sp.	Non-type	Bacteria; Bacillati; Actinomycetota; Actinomycetes; Kitasatosporales; Streptomycetaceae	Aerobic	BAAIGP000000000	Not reported	66.8728	N.A.	N.A.	Hybracter	7035241	73.43	Draft	1	0	0	0	0	0	0	0	7035241	1	7035241	6029	339.8	87.3	21	7	7	7	69	1	99.67	100	0.07	99.89	0.57	0
JCM 18882	Brevibacterium metallidurans	Type	Bacteria; Bacillati; Actinomycetota; Actinomycetes; Micrococcales; Brevibacteriaceae	Aerobic	BAAIGR000000000	BAAAAF010000000	N.A.	N.A.	200.685	Unicycler	3864351	67.72	Draft	52	0	0	0	7	0	0	3	203563	6	594265	3379	338.8	88.9	0	0	0	0	46	52	99.44	99.73	0.04	99.71	0	0
JCM 16927	Cellulomonas chitinilytica	Type	Bacteria; Bacillati; Actinomycetota; Actinomycetes; Micrococcales; Cellulomonadaceae	Aerobic	AP043829	BBHG00000000	13.0792	N.A.	N.A.	Revio	4915601	73.45	Complete	1	1	1	0	0	0	0	0	4915601	1	4915601	4467	335.4	91.4	6	2	2	2	45	1	99.15	100	1.68	99.71	0	0
JCM 18110	Cellulomonas iranensis	Type	Bacteria; Bacillati; Actinomycetota; Actinomycetes; Micrococcales; Cellulomonadaceae	Aerobic	AP043850	BCRB00000000	17.9101	N.A.	N.A.	Flye	3981479	75.31	Complete	1	1	1	0	0	0	1	1	3981479	1	3981479	3533	340.9	90.7	6	2	2	2	49	1	99.1	100	0.04	100	0.67	0
JCM 18755	Cellulomonas pakistanensis	Type	Bacteria; Bacillati; Actinomycetota; Actinomycetes; Micrococcales; Cellulomonadaceae	Aerobic	AP043863	BBHV00000000	18.849	N.A.	N.A.	Flye	4028508	75.72	Complete	1	1	1	0	0	0	0	0	4028508	1	4028508	3628	334.7	90.4	9	3	3	3	48	1	99.38	99.9	0.01	99.42	0	0
JCM 18111	Cellulomonas persica	Type	Bacteria; Bacillati; Actinomycetota; Actinomycetes; Micrococcales; Cellulomonadaceae	Aerobic	AP043851	BJUA00000000	32.9279	N.A.	N.A.	Flye	3677812	73.55	Complete	1	1	1	0	0	0	0	0	3677812	1	3677812	3220	343.3	90.2	6	2	2	2	45	1	99.61	99.99	0.22	99.42	0	0
JCM 9808	Cellulomonas sp.	Non-type	Bacteria; Bacillati; Actinomycetota; Actinomycetes; Micrococcales; Cellulomonadaceae	Aerobic	AP043729	BBEI00000000	42.2661	N.A.	N.A.	Flye	4306458	74.66	Complete	1	1	1	0	0	0	0	0	4306458	1	4306458	3757	347	90.8	9	3	3	3	52	1	100	100	0	100	0.67	0
JCM 15471	Brachybacterium zhongshanense	Type	Bacteria; Bacillati; Actinomycetota; Actinomycetes; Micrococcales; Dermabacteraceae	Aerobic	AP043790	BBHA00000000	18.0087	N.A.	N.A.	Flye	3667387	70.63	Complete	1	1	1	0	0	0	1	1	3667387	1	3667387	3155	344.9	89	13	5	4	4	53	1	100	99.92	0	99.71	0	0
JCM 13591	Microbacterium xylanilyticum	Type	Bacteria; Bacillati; Actinomycetota; Actinomycetes; Micrococcales; Microbacteriaceae	Aerobic	BAAIEN000000000	BBFR00000000	9.21563	N.A.	N.A.	Hybracter	4147444	70.33	Draft	2	0	0	0	1	0	4	6	4063162	1	4063162	3971	317.9	91.3	6	2	2	2	47	2	100	99.99	0.06	98.99	0.17	0
JCM 14115	Paenarthrobacter nitroguajacolicus	Type	Bacteria; Bacillati; Actinomycetota; Actinomycetes; Micrococcales; Micrococcaceae	Aerobic	AP043773, AP043774, AP043775	BBFS00000000	30.4106	N.A.	N.A.	Flye	5133410	61.97	Complete	3	3	1	2	2	0	1	1	5014019	1	5014019	4741	325.9	90.3	18	6	6	6	54	3	99.3	100	0.23	100	1.27	0
JCM 11754	Isoptericola variabilis	Type	Bacteria; Bacillati; Actinomycetota; Actinomycetes; Micrococcales; Promicromonosporaceae	Aerobic	BAAIFI000000000	BBGM00000000	N.A.	27.5414	545.047	Unicycler	4502980	74.25	Draft	49	0	0	0	0	0	2	2	148355	11	331770	4082	338.8	92.2	2	0	1	1	49	49	98.67	99.88	0.01	100	1.16	0
JCM 9534	Catenuloplanes indicus	Type	Bacteria; Bacillati; Actinomycetota; Actinomycetes; Micromonosporales; Micromonosporaceae	Aerobic	BAAIGL000000000	BBHZ00000000	11.7644	N.A.	N.A.	Hybracter	9235614	72.08	Draft	5	0	0	0	0	0	3	4	6522488	1	6522488	8232	332.9	89	15	5	5	5	68	5	98.73	100	0.17	100	1.32	0
JCM 9533	Catenuloplanes niger	Type	Bacteria; Bacillati; Actinomycetota; Actinomycetes; Micromonosporales; Micromonosporaceae	Aerobic	BAAIGK000000000	BBHY00000000	9.03557	N.A.	N.A.	Hybracter	9771129	72.58	Draft	23	1	0	1	2	0	2	2	665817	4	2270956	8522	338	88.4	15	5	5	5	69	23	96.65	99.97	0.33	99.47	1.32	0
JCM 7447	Corynebacterium amycolatum	Type	Bacteria; Bacillati; Actinomycetota; Actinomycetes; Mycobacteriales; Corynebacteriaceae	Aerobic	BAAIFS000000000	Not reported	5.95979	N.A.	776.456	Unicycler	2475163	58.64	Draft	1	0	0	0	0	0	0	0	2475163	1	2475163	2130	341.5	88.2	15	5	5	5	53	1	100	100	0.07	100	0	0
JCM 12107	Corynebacterium simulans	Type	Bacteria; Bacillati; Actinomycetota; Actinomycetes; Mycobacteriales; Corynebacteriaceae	Aerobic	BAAIFN000000000	Not reported	3.06745	N.A.	1942.07	Unicycler	2591400	59.28	Draft	9	0	0	0	1	0	1	0	823695	2	1239912	2392	325.2	90.1	9	3	3	3	52	9	100	99.97	0.12	99.56	0.09	0
JCM 15430	Mycobacterium avium	Non-type	Bacteria; Bacillati; Actinomycetota; Actinomycetes; Mycobacteriales; Mycobacteriaceae	Aerobic	AP043787, AP043788, AP043789	Not reported	57.6744	N.A.	N.A.	Flye	5607771	68.81	Complete	3	3	1	2	2	2	2	1	5426370	1	5426370	5231	323.4	90.5	3	1	1	1	47	3	98.79	100	0.15	100	0	0
JCM 16369	Mycolicibacterium crocinum	Type	Bacteria; Bacillati; Actinomycetota; Actinomycetes; Mycobacteriales; Mycobacteriaceae	Aerobic	AP043815, AP043816, AP043817, AP043818	BBHD00000000,CP092362	9.77393	N.A.	N.A.	Flye	6066626	66.57	Complete	4	2	1	1	3	0	1	0	5965874	1	5965874	5939	318.1	93.4	6	2	2	2	46	4	99.74	100	0	100	0.57	33.33
JCM 12141	Mycolicibacterium hodleri	Type	Bacteria; Bacillati; Actinomycetota; Actinomycetes; Mycobacteriales; Mycobacteriaceae	Aerobic	BAAIGO000000000	BBGO00000000	11.91	N.A.	N.A.	Hybracter	6559169	68.16	Draft	6	3	0	3	5	2	1	4	6180947	1	6180947	6338	317.5	92	6	2	2	2	49	6	98.31	99.89	0.7	99.81	0.82	0
JCM 16370	Mycolicibacterium pallens	Type	Bacteria; Bacillati; Actinomycetota; Actinomycetes; Mycobacteriales; Mycobacteriaceae	Aerobic	AP043819, AP043820, AP043821	BAAAVX010000000,BBHE00000000,CP080333	28.2235	N.A.	N.A.	Flye	6093662	66.43	Complete	3	3	1	2	2	0	2	1	6035584	1	6035584	5979	314.9	92.7	6	2	2	2	46	3	99.37	100	0.09	100	0.38	0
JCM 15927	Mycolicibacterium pyrenivorans	Type	Bacteria; Bacillati; Actinomycetota; Actinomycetes; Mycobacteriales; Mycobacteriaceae	Aerobic	AP043804, AP043805, AP043806, AP043807	BBHB00000000	26.6326	N.A.	N.A.	Flye	6903827	67.26	Complete	4	2	1	1	3	0	0	0	6249039	1	6249039	6644	315.2	91	6	2	2	2	47	4	99.59	100	0.16	99.62	0.49	0
JCM 9803	Rhodococcus erythropolis	Non-type	Bacteria; Bacillati; Actinomycetota; Actinomycetes; Mycobacteriales; Nocardiaceae	Aerobic	BAAIFE000000000	BBEK00000000	31.3708	N.A.	N.A.	Hybracter	6940150	62.37	Complete	4	2	1	1	3	0	3	5	6501992	1	6501992	6473	326.7	91.4	15	5	5	5	57	4	99.38	100	0.1	99.94	1	0
JCM 9804	Rhodococcus erythropolis	Non-type	Bacteria; Bacillati; Actinomycetota; Actinomycetes; Mycobacteriales; Nocardiaceae	Aerobic	AP043724, AP043725	BBFM00000000	25.532	N.A.	N.A.	Revio	6619609	62.47	Complete	2	2	1	1	1	0	3	5	6514755	1	6514755	6139	330.2	91.9	15	5	5	5	58	2	99.36	100	0.1	99.75	0.53	0
JCM 9805	Rhodococcus erythropolis	Non-type	Bacteria; Bacillati; Actinomycetota; Actinomycetes; Mycobacteriales; Nocardiaceae	Aerobic	AP043726, AP043727, AP043728	BBEL00000000	33.8664	N.A.	N.A.	Flye	7048435	62.38	Complete	3	2	1	1	2	0	0	0	6373738	1	6373738	6619	322.7	90.9	15	5	5	5	54	3	99.66	100	0.81	99.94	0.84	0
JCM 9791	Rhodococcus sp.	Non-type	Bacteria; Bacillati; Actinomycetota; Actinomycetes; Mycobacteriales; Nocardiaceae	Aerobic	AP043714, AP043715, AP043716, AP043717	Not reported	52.6868	N.A.	N.A.	Flye	6570452	65.48	Complete	4	1	1	0	3	1	1	1	6136662	1	6136662	6090	328.4	91.3	12	4	4	4	54	4	100	100	0.29	99.06	1.07	0
JCM 9793	Rhodococcus sp.	Non-type	Bacteria; Bacillati; Actinomycetota; Actinomycetes; Mycobacteriales; Nocardiaceae	Aerobic	AP043718, AP043719, AP043720, AP043721	Not reported	40.1583	N.A.	N.A.	Flye	6540887	65.47	Complete	4	1	1	0	3	1	0	0	6122055	1	6122055	6050	328.9	91.3	12	4	4	4	54	4	100	100	0.29	99.06	1.07	0
JCM 10703	Nocardioides nitrophenolicus	Type	Bacteria; Bacillati; Actinomycetota; Actinomycetes; Propionibacteriales; Nocardioidaceae	Aerobic	AP043736	BBGE00000000	12.2392	N.A.	N.A.	Revio	5815021	72.49	Complete	1	1	1	0	0	0	1	1	5815021	1	5815021	5520	327.7	93.3	6	2	2	2	71	1	98.62	100	0.43	99.22	1.04	0
JCM 10369	Nocardioides pyridinolyticus	Type	Bacteria; Bacillati; Actinomycetota; Actinomycetes; Propionibacteriales; Nocardioidaceae	Aerobic	BAAIFY000000000	BBGV00000000	N.A.	0.280799	245.195	Unicycler	4472034	71.5	Draft	94	0	0	0	3	0	1	5	136250	10	401530	4390	308.7	90.9	0	0	0	0	46	94	99.7	100	0.96	99.48	0.82	0
JCM 16518	Nocardioides sp.	Non-type	Bacteria; Bacillati; Actinomycetota; Actinomycetes; Propionibacteriales; Nocardioidaceae	Aerobic	AP043822, AP043823	BBEJ00000000	22.7916	N.A.	N.A.	Flye	4998320	71.9	Complete	2	2	1	1	1	1	0	0	4780931	1	4780931	4750	321.2	91.6	9	3	3	3	47	2	100	100	0.24	99.48	1.3	0
JCM 18899	Nocardioides sp.	Non-type	Bacteria; Bacillati; Actinomycetota; Actinomycetes; Propionibacteriales; Nocardioidaceae	Aerobic	BAAIGC000000000	Not reported	N.A.	N.A.	142.998	Unicycler	5782109	69.52	Draft	91	0	0	0	13	1	2	4	162011	11	547542	5435	316.9	89.4	3	1	1	1	49	91	100	99.76	2.26	99.48	3.28	9.09
JCM 18998	Nocardioides sp.	Non-type	Bacteria; Bacillati; Actinomycetota; Actinomycetes; Propionibacteriales; Nocardioidaceae	Aerobic	AP043886	Not reported	44.5649	N.A.	N.A.	Flye	4343925	70.91	Complete	1	1	1	0	0	0	2	1	4343925	1	4343925	4019	332.3	92.2	12	4	4	4	54	1	99.95	99.97	0.26	99.31	0	0
JCM 18999	Nocardioides sp.	Non-type	Bacteria; Bacillati; Actinomycetota; Actinomycetes; Propionibacteriales; Nocardioidaceae	Aerobic	AP043887	Not reported	37.3795	N.A.	N.A.	Flye	3883913	70.02	Complete	1	1	1	0	0	0	1	1	3883913	1	3883913	3740	326.5	94.3	9	3	3	3	47	1	98.9	100	0.17	98.7	0	0
JCM 18916	Cutibacterium acnes subsp. acnes	Non-type	Bacteria; Bacillati; Actinomycetota; Actinomycetes; Propionibacteriales; Propionibacteriaceae	Anaerobic	BAAIEZ000000000	BAVN00000000	8.89033	N.A.	N.A.	Hybracter	2569180	60.11	Draft	6	0	0	0	1	1	0	0	1454478	1	1454478	2425	314.4	89	9	3	3	3	45	6	97.78	99.96	0.24	99.34	0.22	100
JCM 18909	Cutibacterium acnes subsp. elongatum	Non-type	Bacteria; Bacillati; Actinomycetota; Actinomycetes; Propionibacteriales; Propionibacteriaceae	Anaerobic	BAAIEY000000000	BAVM00000000	N.A.	N.A.	307.582	Unicycler	2531155	60.04	Draft	14	0	0	0	1	0	0	0	351584	3	715826	2420	312.7	89.7	3	1	1	1	45	14	99.76	99.99	0.05	100	0	0
JCM 3263	Thermobifida fusca	Type	Bacteria; Bacillati; Actinomycetota; Actinomycetes; Streptosporangiales; Nocardiopsidaceae	Aerobic	BAAIGW000000000	BCWB00000000	N.A.	0.928515	521.21	Unicycler	3641197	67.55	Draft	33	0	0	0	1	0	0	0	219815	6	383377	3112	326.4	83.7	2	0	1	1	55	33	100	100	0	99.45	0	0
JCM 18997	Conexibacter sp.	Non-type	Bacteria; Bacillati; Actinomycetota; Thermoleophilia; Solirubrobacterales; Conexibacteraceae	Aerobic	AP043885	Not reported	63.2706	N.A.	N.A.	Flye	5263738	72.42	Complete	1	1	1	0	0	0	1	1	5263738	1	5263738	5202	321	95.2	3	1	1	1	45	1	95.86	94.3	0.79	99.57	0	0
JCM 14450	Geobacillus stearothermophilus	Non-type	Bacteria; Bacillati; Bacillota; Bacilli; Bacillales; Anoxybacillaceae	Aerobic	BAAIEX000000000	Not reported	8.98473	N.A.	N.A.	Hybracter	2971762	52.27	Draft	3	1	0	1	1	0	1	2	2225127	1	2225127	3091	268.6	83.8	30	10	10	10	90	3	100	99.67	0.47	98.89	0.68	50
JCM 20266	Bacillus cereus	Non-type	Bacteria; Bacillati; Bacillota; Bacilli; Bacillales; Bacillaceae	Aerobic	AP043895, AP043896, AP043897, AP043898, AP043899, AP043900, AP043901	Not reported	94.7595	N.A.	N.A.	Revio	6107042	35.06	Complete	7	4	1	3	6	4	5	5	5670472	1	5670472	5978	280.2	82.3	42	14	14	14	106	7	100	100	0.19	99.43	0	0
JCM 10596	Caldalkalibacillus mannanilyticus	Type	Bacteria; Bacillati; Bacillota; Bacilli; Bacillales; Bacillaceae	Aerobic	AP043734	BAMO00000000	N.A.	93.2022	416.849	Flye	4618642	39.76	Complete	1	1	1	0	0	0	2	2	4618642	1	4618642	4280	318.8	88.6	32	10	11	11	107	1	100	99.97	1.98	97.31	2.18	0
JCM 21714	Gracilibacillus boraciitolerans	Type	Bacteria; Bacillati; Bacillota; Bacilli; Bacillales; Bacillaceae	Aerobic	AP043914, AP043915	BAVS00000000	27.3141	N.A.	N.A.	Flye	3738522	35.84	Complete	2	2	1	1	0	0	0	1	3598771	1	3598771	3532	299.1	84.8	21	7	7	7	63	2	99.14	99.92	0.38	99.34	1.1	0
JCM 18860	Gracilibacillus pakistanensis	Non-type	Bacteria; Bacillati; Bacillota; Bacilli; Bacillales; Bacillaceae	Aerobic	AP043868	BBHL00000000	105.501	N.A.	N.A.	Flye	4328502	37.09	Complete	1	1	1	0	0	0	1	1	4328502	1	4328502	4052	310.2	87.1	21	7	7	7	62	1	99.54	100	0	100	1.88	0
JCM 18966	Gracilibacillus sp.	Non-type	Bacteria; Bacillati; Bacillota; Bacilli; Bacillales; Bacillaceae	Aerobic	AP043881, AP043882, AP043883	BBFF00000000	14.6748	N.A.	N.A.	Flye	4228030	37.14	Complete	3	1	1	0	0	0	0	0	4215634	1	4215634	3974	307	86.6	21	7	7	7	62	3	99.84	100	0	99.34	1.88	0
JCM 9157	Halalkalibacter akibai	Type	Bacteria; Bacillati; Bacillota; Bacilli; Bacillales; Bacillaceae	Aerobic	AP043711	BAUV00000000,BAZQ00000000	14.3688	N.A.	N.A.	Flye	4933995	37.39	Complete	1	1	1	0	0	0	0	0	4933995	1	4933995	4744	287.1	82.8	59	21	19	19	149	1	99.98	100	0.93	98.01	2.21	0
JCM 9140	Halalkalibacter wakoensis	Type	Bacteria; Bacillati; Bacillota; Bacilli; Bacillales; Bacillaceae	Aerobic	AP043710	BAUT00000000,BAZN00000000	22.3748	N.A.	N.A.	Flye	4723160	38.61	Complete	1	1	1	0	0	0	1	1	4723160	1	4723160	4491	290.8	83	56	20	18	18	122	1	100	100	0.88	98.68	2.21	0
JCM 12149	Lentibacillus halophilus	Type	Bacteria; Bacillati; Bacillota; Bacilli; Bacillales; Bacillaceae	Aerobic	AP043750	BAAADM010000000	12.0927	N.A.	N.A.	Flye	2976565	43.54	Complete	1	1	1	0	0	0	1	1	2976565	1	2976565	2881	289.7	84.1	20	6	7	7	67	1	99.28	93.28	0.07	98.68	0	0
JCM 30234	Lentibacillus kimchii	Type	Bacteria; Bacillati; Bacillota; Bacilli; Bacillales; Bacillaceae	Aerobic	AP043932, AP043933, AP043934, AP043935	JBHTGR000000000	75.8961	N.A.	N.A.	Flye	2809322	44.09	Complete	4	2	1	1	0	0	2	2	2756873	1	2756873	2772	284	84.1	20	6	7	7	64	4	97.26	84.25	0.44	96.69	0.66	0
JCM 18776	Lysinibacillus pakistanensis	Type	Bacteria; Bacillati; Bacillota; Bacilli; Bacillales; Bacillaceae	Aerobic	AP043864	BBDJ00000000	24.0746	N.A.	N.A.	Flye	5094512	36.6	Complete	1	1	1	0	0	0	3	4	5094512	1	5094512	4934	284.2	82.6	34	12	11	11	108	1	100	99.98	0.9	99.34	1.24	25
JCM 12389	Salinibacillus aidingensis	Type	Bacteria; Bacillati; Bacillota; Bacilli; Bacillales; Bacillaceae	Aerobic	AP043759	BAAADO010000000	0.751213	279.081	N.A.	Flye	3522017	40.45	Complete	1	1	1	0	0	0	1	1	3522017	1	3522017	3487	281.7	83.7	24	8	8	8	72	1	97.68	87.42	1.07	98.67	1.22	0
JCM 30907	Virgibacillus ainsalahensis	Type	Bacteria; Bacillati; Bacillota; Bacilli; Bacillales; Bacillaceae	Aerobic	AP043943	BAAGVE010000000	971.993	N.A.	N.A.	Flye	3861668	39.43	Complete	1	1	1	0	0	0	0	1	3861668	1	3861668	3719	282.7	81.7	21	7	7	7	62	1	99.58	99.99	0.86	99.33	1.56	0
JCM 32284	Virgibacillus kimchii	Type	Bacteria; Bacillati; Bacillota; Bacilli; Bacillales; Bacillaceae	Aerobic	AP043951	BAAHCJ010000000	27.427	N.A.	N.A.	Flye	4223230	40.73	Complete	1	1	1	0	0	0	3	3	4223230	1	4223230	4076	283.5	82.1	17	5	6	6	66	1	100	100	1.57	99.33	0.33	0
JCM 15395	Virgibacillus siamensis	Type	Bacteria; Bacillati; Bacillota; Bacilli; Bacillales; Bacillaceae	Aerobic	AP043786	BAAADS010000000	21.896	N.A.	N.A.	Flye	3677844	41.46	Complete	1	1	1	0	0	0	0	0	3677844	1	3677844	3629	284.9	84.3	18	6	6	6	64	1	100	99.96	0.94	98.67	0.22	0
JCM 7671	Listeria monocytogenes	Non-type	Bacteria; Bacillati; Bacillota; Bacilli; Bacillales; Listeriaceae	Aerobic	BAAIFD000000000	Not reported	N.A.	N.A.	264.206	Unicycler	2875108	37.89	Draft	17	0	0	0	0	0	2	3	1500643	1	1500643	2841	303.8	90.1	1	0	1	0	36	17	99.83	99.99	0.51	99.45	0	0
JCM 16418	Paenibacillus pini	Type	Bacteria; Bacillati; Bacillota; Bacilli; Bacillales; Paenibacillaceae	Aerobic	BAAIFZ000000000	BAVZ00000000,BAZT00000000	N.A.	5.6087	360.871	Unicycler	4974885	42.05	Draft	23	0	0	0	0	0	3	3	3078632	1	3078632	4658	312	87.6	2	2	0	0	72	23	99.36	91.34	0.11	99.5	0	0
JCM 10914	Paenibacillus sp.	Non-type	Bacteria; Bacillati; Bacillota; Bacilli; Bacillales; Paenibacillaceae	Aerobic	BAAIFF000000000	BAUO00000000	32.3306	N.A.	N.A.	Hybracter	6299834	48.79	Draft	2	0	0	0	0	0	6	3	6258535	1	6258535	5614	329.2	88	24	8	8	8	73	2	99	100	0.55	99.85	0.44	0
JCM 16163	Paenibacillus sp.	Non-type	Bacteria; Bacillati; Bacillota; Bacilli; Bacillales; Paenibacillaceae	Aerobic	BAAIGM000000000	Not reported	N.A.	N.A.	163.747	Unicycler	5215397	50.05	Draft	97	0	0	0	9	0	1	2	173659	12	330167	5009	303.5	87.4	0	0	0	0	67	97	100	100	1.29	98.66	0.11	0
JCM 18996	Paenibacillus sp.	Non-type	Bacteria; Bacillati; Bacillota; Bacilli; Bacillales; Paenibacillaceae	Aerobic	AP043884	Not reported	73.3095	N.A.	N.A.	Flye	3917731	50.28	Complete	1	1	1	0	0	0	2	2	3917731	1	3917731	3754	295.4	84.9	28	10	9	9	85	1	100	97.07	1.33	98.66	2.24	0
JCM 9795	Paenibacillus sp.	Non-type	Bacteria; Bacillati; Bacillota; Bacilli; Bacillales; Paenibacillaceae	Aerobic	AP043722	Not reported	64.1871	N.A.	N.A.	Flye	5653810	52.19	Complete	1	1	1	0	0	0	0	0	5653810	1	5653810	5271	310.8	86.9	36	12	12	12	100	1	100	99.98	5.67	99.19	1.88	0
JCM 9796	Paenibacillus sp.	Non-type	Bacteria; Bacillati; Bacillota; Bacilli; Bacillales; Paenibacillaceae	Aerobic	AP043723	Not reported	81.9291	N.A.	N.A.	Flye	5658185	52.18	Complete	1	1	1	0	0	0	0	0	5658185	1	5658185	5276	310.7	86.9	36	12	12	12	100	1	100	99.98	5.67	99.19	1.88	0
JCM 7540	Paenibacillus thiaminolyticus	Non-type	Bacteria; Bacillati; Bacillota; Bacilli; Bacillales; Paenibacillaceae	Aerobic	AP043707	Not reported	38.0506	N.A.	N.A.	Flye	6594347	53.64	Complete	1	1	1	0	0	0	3	4	6594347	1	6594347	5743	320.5	83.7	24	8	8	8	82	1	99.76	100	2.36	99.39	0.5	0
JCM 2151	Staphylococcus aureus	Non-type	Bacteria; Bacillati; Bacillota; Bacilli; Bacillales; Staphylococcaceae	Aerobic	AP043700	Not reported	95.7828	N.A.	N.A.	Flye	2720318	32.83	Complete	1	1	1	0	0	1	4	2	2720318	1	2720318	2486	305.3	83.7	16	6	5	5	57	1	100	100	0.07	99.39	0.08	0
JCM 2179	Staphylococcus aureus	Non-type	Bacteria; Bacillati; Bacillota; Bacilli; Bacillales; Staphylococcaceae	Aerobic	BAAIGV000000000	Not reported	N.A.	N.A.	242.245	Unicycler	2776856	32.67	Draft	78	0	0	0	11	3	15	20	100176	10	193153	2560	300.5	83.1	3	2	0	1	50	78	100	100	0.17	99.67	0.08	0
JCM 8702	Staphylococcus aureus	Non-type	Bacteria; Bacillati; Bacillota; Bacilli; Bacillales; Staphylococcaceae	Aerobic	AP043708, AP043709	Not reported	90.1891	N.A.	N.A.	Flye	2914467	32.93	Complete	2	2	1	1	1	1	6	4	2887113	1	2887113	2716	299.6	83.8	19	7	6	6	61	2	100	100	0.48	99.67	0.17	0
JCM 14719	Calditerricola satsumensis	Type	Bacteria; Bacillati; Bacillota; Bacilli; Calditerricolales; Calditerricolaceae	Aerobic	BAAIFG000000000	BBCF00000000	1.03752	N.A.	1241.82	Unicycler	2467035	64.09	Draft	44	1	0	1	0	0	0	0	106340	10	202454	2424	296.3	87.4	6	2	2	2	62	44	99.81	95.59	0.43	96.77	0.77	0
JCM 14720	Calditerricola yamamurae	Type	Bacteria; Bacillati; Bacillota; Bacilli; Calditerricolales; Calditerricolaceae	Aerobic	BAAIFH000000000	Not reported	16.0634	N.A.	N.A.	Hybracter	2489749	62.73	Draft	6	1	0	1	1	0	0	1	747700	2	1217626	2388	302.7	87.1	20	6	7	7	70	6	99.75	93.73	0.14	96.77	0.77	0
JCM 20313	Enterococcus faecalis	Non-type	Bacteria; Bacillati; Bacillota; Bacilli; Lactobacillales; Enterococcaceae	Aerobic	BAAIHE000000000	Not reported	N.A.	N.A.	391.262	Unicycler	2501358	38.45	Draft	58	0	0	0	5	0	1	3	103722	9	204563	2362	304.6	86.3	2	1	1	0	55	58	99.29	100	0.5	99.63	0.81	0
JCM 31185	Furfurilactobacillus curtus	Type	Bacteria; Bacillati; Bacillota; Bacilli; Lactobacillales; Lactobacillaceae	Anaerobic	BAAHXU000000000	Not reported	6.73487	N.A.	620.816	Unicycler	2179710	43.93	Draft	7	1	0	1	2	2	1	1	2100053	1	2100053	1989	309.9	84.8	10	3	3	4	55	7	98.9	99.99	0.31	99.18	0	0
JCM 17300	Ligilactobacillus faecis	Type	Bacteria; Bacillati; Bacillota; Bacilli; Lactobacillales; Lactobacillaceae	Anaerobic	AP042428	Not reported	10.2321	N.A.	N.A.	Hybracter	2057552	39.93	Complete	1	1	1	0	0	0	2	2	2057552	1	2057552	1896	315	87.1	19	7	6	6	64	1	100	99.81	0.02	98.69	0.52	0
JCM 18671	Secundilactobacillus oryzae	Type	Bacteria; Bacillati; Bacillota; Bacilli; Lactobacillales; Lactobacillaceae	Anaerobic	AP043859, AP043860, AP043861, AP043862	BBJM00000000	19.1108	N.A.	N.A.	Flye	1948177	42.8	Complete	4	4	1	3	3	3	1	1	1887576	1	1887576	1959	288.9	87.2	15	5	5	5	64	4	98.55	99.95	0.16	98.7	0	0
JCM 31116	Streptococcus alactolyticus	Type	Bacteria; Bacillati; Bacillota; Bacilli; Lactobacillales; Streptococcaceae	Anaerobic	AP042455	Not reported	24.2749	N.A.	N.A.	Flye	1758390	40.63	Complete	1	1	1	0	0	0	2	1	1758390	1	1758390	1716	298	87.2	18	6	6	6	69	1	100	100	0.02	100	1.06	0
JCM 5802	Streptococcus equinus	Non-type	Bacteria; Bacillati; Bacillota; Bacilli; Lactobacillales; Streptococcaceae	Aerobic	BAAIEV000000000	Not reported	N.A.	N.A.	489.876	Unicycler	1837747	37.16	Draft	22	1	0	1	1	0	0	1	177240	3	535986	1737	314.2	89.1	2	0	1	1	23	22	100	100	0.54	100	0	0
JCM 12261	Streptococcus gallolyticus subsp. pasteurianus	Type	Bacteria; Bacillati; Bacillota; Bacilli; Lactobacillales; Streptococcaceae	Anaerobic	AP042438	Not reported	32.9966	N.A.	N.A.	Flye	2177854	37.41	Complete	1	1	1	0	0	0	3	2	2177854	1	2177854	2134	289.4	85.1	18	6	6	6	70	1	100	100	0.19	100	0.37	0
JCM 5176	Streptococcus sobrinus	Non-type	Bacteria; Bacillati; Bacillota; Bacilli; Lactobacillales; Streptococcaceae	Aerobic	BAAIGY000000000	Not reported	N.A.	N.A.	434.58	Unicycler	2067608	43.6	Draft	60	0	0	0	1	0	1	0	65685	11	173001	1909	299.5	83	1	0	1	0	29	60	100	99.97	0.1	98.88	0.5	0
JCM 16981	Salinicoccus jeotgali	Type	Bacteria; Bacillati; Bacillota; Bacilli; Staphylococcales; Salinicoccaceae	Aerobic	AP043830, AP043831, AP043832, AP043833	BAABCK010000000	32.2666	N.A.	N.A.	Revio	2415800	44.67	Complete	4	3	1	2	3	0	1	1	2281923	1	2281923	2452	292.3	89	12	4	4	4	59	4	100	99.89	2.94	99.43	2.87	0
JCM 19029	Salinicoccus sesuvii	Type	Bacteria; Bacillati; Bacillota; Bacilli; Staphylococcales; Salinicoccaceae	Aerobic	BAAIGA000000000	JBHSCC010000000	93.3771	N.A.	N.A.	Hybracter	2564959	43.39	Complete	1	1	1	0	0	0	2	3	2564959	1	2564959	2584	297.9	90	12	4	4	4	60	1	100	99.97	0.04	99.43	1.34	0
JCM 12822	Salinicoccus siamensis	Type	Bacteria; Bacillati; Bacillota; Bacilli; Staphylococcales; Salinicoccaceae	Aerobic	AP043765, AP043766	JBHMAH010000000	24.0099	N.A.	N.A.	Flye	2187116	45.82	Complete	2	2	1	1	0	0	0	1	2177206	1	2177206	2204	295.6	89.4	12	4	4	4	59	2	100	99.96	0.16	99.43	1.15	0
JCM 19376	Fusibacter bizertensis	Type	Bacteria; Bacillati; Bacillota; Clostridia; Eubacteriales	Anaerobic	BAAHXZ000000000	Not reported	0.647066	1054.05	N.A.	Hybracter	4581805	36.72	Draft	2	0	0	0	0	0	2	2	4478535	1	4478535	4166	324.3	88.5	15	5	5	5	66	2	97.85	100	4.77	99.29	4.61	0
JCM 19912	Fusibacter fontis	Type	Bacteria; Bacillati; Bacillota; Clostridia; Eubacteriales	Anaerobic	AP042445	Not reported	33.2426	N.A.	N.A.	Flye	3341470	37.15	Complete	1	1	1	0	0	0	1	1	3341470	1	3341470	2947	335.6	88.8	19	7	6	6	66	1	98.03	98.97	1.13	99.29	0.71	0
JCM 13267	Howardella ureilytica	Type	Bacteria; Bacillati; Bacillota; Clostridia; Eubacteriales	Anaerobic	BAAHYP000000000	Not reported	N.A.	N.A.	1060.66	Unicycler	1624642	38.59	Draft	31	0	0	0	1	0	0	2	117011	5	258854	1435	326.3	86.5	1	0	1	0	41	31	98.53	91.71	0	93.96	0	0
JCM 30795	Agathobaculum butyriciproducens	Type	Bacteria; Bacillati; Bacillota; Clostridia; Eubacteriales; Butyricicoccaceae	Anaerobic	BAAHYB000000000	Not reported	0.285007	90.6932	1350.92	Hybracter	2878456	54.13	Draft	19	0	0	0	1	0	0	2	383409	3	574226	2558	312.7	83.4	16	5	7	4	84	19	99.7	99.68	1.5	99.33	0.67	0
JCM 1385	Clostridium baratii	Type	Bacteria; Bacillati; Bacillota; Clostridia; Eubacteriales; Clostridiaceae	Anaerobic	AP042432	Not reported	2.29608	102.208	N.A.	Flye	3067813	28.37	Complete	1	1	1	0	0	0	1	1	3067813	1	3067813	2872	310.1	87.1	28	10	9	9	82	1	97	99.99	0.03	99.19	1.61	0
JCM 9989	Clostridium budayi	Type	Bacteria; Bacillati; Bacillota; Clostridia; Eubacteriales; Clostridiaceae	Anaerobic	AP042456	Not reported	98.8614	N.A.	N.A.	Flye	3022431	28.22	Complete	1	1	1	0	0	0	0	0	3022431	1	3022431	2838	308.3	86.8	24	8	8	8	80	1	99.3	99.84	0.43	99.19	1.61	0
JCM 1393	Clostridium carnis	Type	Bacteria; Bacillati; Bacillota; Clostridia; Eubacteriales; Clostridiaceae	Anaerobic	BAAHYS000000000	Not reported	13.601	N.A.	N.A.	Hybracter	3137067	27.91	Draft	3	1	0	1	1	0	2	2	3104170	1	3104170	2950	308	86.9	24	8	8	8	88	3	98.45	98.12	1.72	99.98	0	0
JCM 14030	Clostridium nitrophenolicum	Type	Bacteria; Bacillati; Bacillota; Clostridia; Eubacteriales; Clostridiaceae	Anaerobic	AP042469	Not reported	72.9164	N.A.	N.A.	Hybracter	5767678	31.34	Complete	1	1	1	0	0	0	3	4	5767678	1	5767678	5282	302.8	83.2	39	12	14	13	102	1	99.93	100	5.19	99.31	6.66	18.75
JCM 1406	Clostridium novyi	Type	Bacteria; Bacillati; Bacillota; Clostridia; Eubacteriales; Clostridiaceae	Anaerobic	BAAHYM000000000	Not reported	N.A.	N.A.	700.059	Unicycler	2567013	28.53	Draft	43	1	0	1	0	0	4	5	110737	7	357720	2400	316.2	88.7	4	3	1	0	54	43	98.65	99.92	0	100	0.69	0
JCM 10519	Clostridium sp.	Non-type	Bacteria; Bacillati; Bacillota; Clostridia; Eubacteriales; Clostridiaceae	Anaerobic	AP043733	Not reported	38.8445	N.A.	N.A.	Flye	4775276	44.2	Complete	1	1	1	0	0	0	5	8	4775276	1	4775276	4286	323.6	87.1	12	0	6	6	68	1	98.21	99.95	0.4	99.37	0	0
JCM 21531	Acetivibrio straminisolvens	Type	Bacteria; Bacillati; Bacillota; Clostridia; Eubacteriales; Oscillospiraceae	Anaerobic	AP043913	BAVR00000000	N.A.	147.169	457.631	Flye	4111093	38.34	Complete	1	1	1	0	0	0	2	4	4111093	1	4111093	3461	342.6	86.5	12	4	4	4	56	1	98.93	99.99	0.04	100	0.67	0
JCM 17042	Ruminococcus champanellensis	Type	Bacteria; Bacillati; Bacillota; Clostridia; Eubacteriales; Oscillospiraceae	Anaerobic	BAAIFP000000000	BBEP00000000	N.A.	0.0513651	375.107	Unicycler	2505051	53.46	Draft	75	0	0	0	1	0	7	9	83161	10	249845	2220	330.5	87.9	3	1	1	1	43	75	100	99.98	0.51	99.16	0	0
JCM 17209	Desulfovectis peckii	Type	Bacteria; Bacillati; Bacillota; Clostridia; Eubacteriales; Peptococcaceae	Anaerobic	AP042409	Not reported	125.7	N.A.	N.A.	Flye	2384325	43.43	Complete	1	1	1	0	0	0	0	0	2384325	1	2384325	2294	296.8	85.7	15	5	5	5	66	1	100	98.09	0.04	99.28	0	0
JCM 15048	Symbiobacterium ostreiconchae	Type	Bacteria; Bacillati; Bacillota; Clostridia; Eubacteriales; Symbiobacteriaceae	Anaerobic	AP042454	Not reported	213.688	N.A.	N.A.	Flye	3636849	68.77	Complete	1	1	1	0	0	0	1	1	3636849	1	3636849	3387	313.2	87.5	17	5	6	6	98	1	100	99.94	0.46	97.69	0.03	0
JCM 15996	Symbiobacterium turbinis	Type	Bacteria; Bacillati; Bacillota; Clostridia; Eubacteriales; Symbiobacteriaceae	Anaerobic	AP042433	Not reported	N.A.	660.938	1034.91	Flye	3796082	67.62	Complete	1	1	1	0	0	0	1	0	3796082	1	3796082	3526	313.3	87.3	18	6	6	6	102	1	100	99.9	0.73	98.02	0.03	0
JCM 18213	Halanaerobium sehlinense	Type	Bacteria; Bacillati; Bacillota; Clostridia; Halanaerobiales; Halanaerobiaceae	Anaerobic	AP042442, AP042443	Not reported	10.6718	N.A.	N.A.	Revio	2905686	33.25	Complete	2	2	1	1	0	0	1	1	2851563	1	2851563	2731	316.8	89.3	12	4	4	4	59	2	98.27	98.96	3.05	99.13	2.17	0
JCM 15060	Halanaerobaculum tunisiense	Type	Bacteria; Bacillati; Bacillota; Clostridia; Halanaerobiales; Halobacteroidaceae	Anaerobic	BAAHYI000000000	Not reported	N.A.	11.451	936.969	Unicycler	2501262	34.65	Draft	33	0	0	0	0	0	0	0	190425	5	321716	2434	294.8	86.1	4	1	2	1	61	33	97.43	99.97	1.17	98.23	1.33	0
JCM 16358	Halanaerocella petrolearia	Type	Bacteria; Bacillati; Bacillota; Clostridia; Halanaerobiales; Halobacteroidaceae	Anaerobic	BAAHXW000000000	Not reported	9.57108	N.A.	N.A.	Hybracter	2759461	32.76	Draft	2	0	0	0	0	0	1	1	1444175	1	1444175	2646	302	86.9	18	6	6	6	91	2	97.52	99.45	1.19	98.23	2.95	0
JCM 16312	Defluviitalea saccharophila	Type	Bacteria; Bacillati; Bacillota; Clostridia; Lachnospirales; Defluviitaleaceae	Anaerobic	AP042470	CP121687	96.1317	N.A.	N.A.	Flye	3014578	35.81	Complete	1	1	1	0	0	0	1	3	3014578	1	3014578	2789	318.5	88.4	15	0	8	7	74	1	100	99.43	0.42	98.66	2.59	0
JCM 17205	Blautia faecis	Type	Bacteria; Bacillati; Bacillota; Clostridia; Lachnospirales; Lachnospiraceae	Anaerobic	AP042440	Not reported	38.325	N.A.	N.A.	Flye	4633985	42.63	Complete	1	1	1	0	0	0	5	9	4633985	1	4633985	4103	324.2	86.1	24	8	8	8	67	1	100	99.92	1.98	99.37	0	0
JCM 17039	Blautia glucerasea	Type	Bacteria; Bacillati; Bacillota; Clostridia; Lachnospirales; Lachnospiraceae	Anaerobic	BAAHXY000000000	Not reported	N.A.	34.1261	621.794	Hybracter	2999599	42.33	Complete	2	1	1	0	0	0	2	3	2996796	1	2996796	2753	325	89.5	18	6	6	6	57	2	98.88	98.87	1.33	99.37	0	0
JCM 17204	Blautia stercoris	Type	Bacteria; Bacillati; Bacillota; Clostridia; Lachnospirales; Lachnospiraceae	Anaerobic	BAAHYF000000000	Not reported	11.2983	N.A.	N.A.	Hybracter	3685758	38.88	Draft	4	0	0	0	0	0	4	3	2035908	1	2035908	3352	322.5	88	15	1	7	7	65	4	99.82	100	0.92	98.73	0	0
JCM 18507	Fusicatenibacter saccharivorans	Type	Bacteria; Bacillati; Bacillota; Clostridia; Lachnospirales; Lachnospiraceae	Anaerobic	BAAHYG000000000	Not reported	0.766663	80.2337	388.077	Hybracter	3914848	47.07	Draft	14	1	0	1	2	0	3	3	627524	3	932840	3529	322.6	87.2	14	5	6	3	61	14	98.19	100	0.92	98.95	0.95	0
JCM 15917	Mediterraneibacter faecis	Type	Bacteria; Bacillati; Bacillota; Clostridia; Lachnospirales; Lachnospiraceae	Anaerobic	AP043803	BBDW00000000	N.A.	334.887	327.678	Flye	3294639	41.08	Complete	1	1	1	0	0	0	3	3	3294639	1	3294639	3043	317.2	87.9	18	6	6	6	59	1	98.82	99.95	0.07	98.54	0	0
JCM 13368	Mediterraneibacter glycyrrhizinilyticus	Type	Bacteria; Bacillati; Bacillota; Clostridia; Lachnospirales; Lachnospiraceae	Anaerobic	AP042439	Not reported	52.4265	N.A.	N.A.	Flye	3287311	45.31	Complete	1	1	1	0	0	0	3	1	3287311	1	3287311	2993	326.4	89.2	18	6	6	6	58	1	97.82	99.73	0.84	99.42	0	0
JCM 13369	Mediterraneibacter glycyrrhizinilyticus	Non-type	Bacteria; Bacillati; Bacillota; Clostridia; Lachnospirales; Lachnospiraceae	Anaerobic	BAAIFO000000000	BBAB00000000	N.A.	N.A.	290.286	Unicycler	3208621	45.35	Draft	71	0	0	0	7	1	4	3	102987	10	369863	2907	328.1	89.2	1	0	1	0	53	71	97.49	99.64	0.63	99.42	0	0
JCM 17581	Roseburia faecis	Type	Bacteria; Bacillati; Bacillota; Clostridia; Lachnospirales; Lachnospiraceae	Anaerobic	AP042441	CP173697	N.A.	125.535	N.A.	Flye	3385412	42.97	Complete	1	1	1	0	0	0	0	1	3385412	1	3385412	3229	311.6	89.2	8	0	4	4	53	1	98.99	99.94	0.95	99.21	1.69	0
JCM 11672	Alkaliphilus crotonatoxidans	Type	Bacteria; Bacillati; Bacillota; Clostridia; Peptostreptococcales; Natronincolaceae	Anaerobic	BAAHXS000000000	Not reported	9.15056	N.A.	N.A.	Hybracter	3914444	40.84	Draft	6	0	0	0	1	0	1	1	1395234	2	1797621	3652	306.8	85.9	21	7	7	7	92	6	99.58	100	1.59	100	2.13	33.33
JCM 13990	Tindallia texcoconensis	Type	Bacteria; Bacillati; Bacillota; Clostridia; Peptostreptococcales; Tindalliaceae	Anaerobic	AP042431	Not reported	65.0108	N.A.	N.A.	Flye	3005878	40.35	Complete	1	1	1	0	0	0	0	0	3005878	1	3005878	2661	338.3	89.8	13	5	4	4	52	1	100	100	0.18	98.25	0	0
JCM 16816	Thermoanaerobacter brockii subsp. lactiethylicus	Type	Bacteria; Bacillati; Bacillota; Clostridia; Thermoanaerobacterales; Thermoanaerobacteraceae	Anaerobic	BAAHYC000000000	Not reported	16.9846	N.A.	N.A.	Hybracter	2412053	34.42	Draft	5	0	0	0	1	0	1	2	2095426	1	2095426	2421	291.9	87.9	8	0	4	4	56	5	100	100	1.23	99.38	0	0
JCM 18270	Thermoanaerobacterium calidifontis	Type	Bacteria; Bacillati; Bacillota; Clostridia; Thermoanaerobacterales; Thermoanaerobacteraceae	Anaerobic	AP042436	Not reported	17.5106	N.A.	N.A.	Flye	2686457	35.18	Complete	1	1	1	0	0	0	3	2	2686457	1	2686457	2681	298.8	89.5	17	5	5	7	59	1	100	99.97	0.03	99.9	0.85	14.29
JCM 15765	Desulfitobacterium aromaticivorans	Type	Bacteria; Bacillati; Bacillota; Desulfitobacteriia; Desulfitobacteriales; Desulfitobacteriaceae	Anaerobic	BAAHYT000000000	Not reported	N.A.	73.6985	496.413	Hybracter	4542991	47.5	Draft	12	0	0	0	0	0	10	9	1256766	2	2247946	4551	289.7	87.1	13	5	4	4	66	12	100	99.98	6.84	99.94	1.66	0
JCM 17380	Desulfosporosinus burensis	Type	Bacteria; Bacillati; Bacillota; Desulfitobacteriia; Desulfitobacteriales; Desulfitobacteriaceae	Anaerobic	BAAHYN000000000	Not reported	1.66004	N.A.	137.647	Unicycler	5740575	42.83	Draft	82	0	0	0	0	0	2	4	324651	7	570468	5458	289.1	82.5	19	6	7	6	78	82	99.63	100	13.73	99.43	2.97	0
JCM 31105	Desulfosporosinus nitroreducens	Type	Bacteria; Bacillati; Bacillota; Desulfitobacteriia; Desulfitobacteriales; Desulfitobacteriaceae	Anaerobic	AP042403	Not reported	21.2593	N.A.	N.A.	Flye	5627572	41.75	Complete	1	1	1	0	0	0	2	3	5627572	1	5627572	5306	287.8	81.4	33	11	11	11	88	1	99.25	100	4.98	100	1.36	0
JCM 14036	Desulfotomaculum defluvii	Type	Bacteria; Bacillati; Bacillota; Desulfotomaculia; Desulfotomaculales; Desulfotomaculaceae	Anaerobic	BAAHYV000000000	Not reported	N.A.	205.9	393.754	Hybracter	3699189	40.65	Draft	8	1	0	1	0	0	3	3	905620	2	1690607	3580	292	84.8	16	6	6	4	103	8	100	99.98	0.39	99.28	2.11	0
JCM 39194	Desulfotomaculum varum	Type	Bacteria; Bacillati; Bacillota; Desulfotomaculia; Desulfotomaculales; Desulfotomaculaceae	Anaerobic	BAAHYO000000000	Not reported	6.80279	N.A.	615.236	Unicycler	2641658	48.66	Draft	14	0	0	0	0	0	2	3	1798789	1	1798789	2565	295.2	86	22	8	7	7	66	14	100	99.95	0	99.37	0.32	0
JCM 10604	Coprobacillus cateniformis	Type	Bacteria; Bacillati; Bacillota; Erysipelotrichia; Erysipelotrichales; Coprobacillaceae	Anaerobic	AP043735	BBDT00000000	40.5704	N.A.	N.A.	Flye	3669259	31.34	Complete	1	1	1	0	0	0	1	4	3669259	1	3669259	3625	299.4	88.7	12	4	4	4	50	1	100	99.88	0.96	100	0	0
JCM 30191	Breznakia pachnodae	Type	Bacteria; Bacillati; Bacillota; Erysipelotrichia; Erysipelotrichales; Erysipelotrichaceae	Anaerobic	AP042444	JAUSUR010000000	166.349	N.A.	N.A.	Revio	4319598	32.69	Complete	1	1	1	0	0	0	2	4	4319598	1	4319598	4049	324	91.1	6	2	2	2	33	1	97.14	96.87	6.13	99.06	3.3	0
JCM 32836	Desulfosporomusa polytropa	Type	Bacteria; Bacillati; Bacillota; Negativicutes; Selenomonadales; Sporomusaceae	Anaerobic	AP042400, AP042399	Not reported	N.A.	132.595	N.A.	Flye	5898239	43.1	Complete	2	2	1	1	0	0	2	3	5636488	1	5636488	5515	304.7	85.5	45	15	16	14	139	2	100	100	12.1	100	7.43	0
JCM 13218	Sporomusa intestinalis	Type	Bacteria; Bacillati; Bacillota; Negativicutes; Selenomonadales; Sporomusaceae	Anaerobic	AP042390	Not reported	12.8306	N.A.	N.A.	Revio	5535802	50.76	Complete	1	1	1	0	0	0	4	4	5535802	1	5535802	5012	316.7	86	36	13	12	11	106	1	99.19	100	6.68	100	3.63	0
JCM 31403	Megasphaera hexanoica	Type	Bacteria; Bacillati; Bacillota; Negativicutes; Veillonellales; Veillonellaceae	Anaerobic	AP042418	Not reported	20.9216	N.A.	N.A.	Flye	2882543	49	Complete	1	1	1	0	0	0	7	8	2882543	1	2882543	2725	313.4	88.9	18	6	6	6	57	1	100	100	0.33	100	0.2	0
JCM 13344	Syntrophomonas erecta subsp. sporosyntropha	Type	Bacteria; Bacillati; Bacillota; Syntrophomonadia; Syntrophomonadales; Syntrophomonadaceae	Anaerobic	AP042459	Not reported	48.8681	N.A.	N.A.	Flye	2735001	42.88	Complete	1	1	1	0	0	0	6	5	2735001	1	2735001	2576	304.8	86.1	9	3	3	3	50	1	100	100	1.27	97.35	0.98	0
JCM 17260	Thermosyntropha tengcongensis	Type	Bacteria; Bacillati; Bacillota; Syntrophomonadia; Syntrophomonadales; Syntrophomonadaceae	Anaerobic	AP042437	Not reported	21.8004	N.A.	N.A.	Flye	2325046	42.56	Complete	1	1	1	0	0	0	0	0	2325046	1	2325046	2207	316.9	90.2	9	3	3	3	48	1	100	100	0.98	99.11	0.04	0
JCM 13210	Thermaerobacter litoralis	Type	Bacteria; Bacillati; Bacillota; Thermaerobacteria; Thermaerobacterales; Thermaerobacteraceae	Aerobic	BAAIES000000000	Not reported	6.72934	N.A.	1095.92	Hybracter	2954135	72.81	Draft	11	1	0	1	0	0	0	1	383043	3	738983	2384	349	84.5	7	2	3	2	49	11	92.89	98.79	1.51	95.05	1.68	33.33
JCM 11223	Thermaerobacter nagasakiensis	Type	Bacteria; Bacillati; Bacillota; Thermaerobacteria; Thermaerobacterales; Thermaerobacteraceae	Aerobic	AP043740	Not reported	18.6117	N.A.	N.A.	Flye	2786320	72.41	Complete	1	1	1	0	0	0	0	0	2786320	1	2786320	2288	344.3	84.8	6	2	2	2	48	1	95.81	99.98	0.17	96.04	0.5	0
JCM 17239	Anaerosalibacter bizertensis	Type	Bacteria; Bacillati; Bacillota; Tissierellia; Tissierellales; Sporanaerobacteraceae	Anaerobic	AP042468	Not reported	152.844	29.5666	855.12	Flye	2622249	29.81	Complete	1	1	1	0	0	0	0	0	2622249	1	2622249	2542	299.3	87	15	5	5	5	60	1	98.72	99.98	0.01	98.6	1.4	0
JCM 30480	Brassicibacter thermophilus	Type	Bacteria; Bacillati; Bacillota; Tissierellia; Tissierellales; Thermohalobacteraceae	Anaerobic	AP042446	Not reported	65.7186	N.A.	N.A.	Flye	2753922	29.55	Complete	1	1	1	0	0	0	0	0	2753922	1	2753922	2557	309.2	86.1	15	5	5	5	65	1	100	99.56	2.26	99.3	1.41	0
JCM 16120	Caldilinea tarbellica	Type	Bacteria; Bacillati; Chloroflexota; Caldilineae; Caldilineales; Caldilineaceae	Anaerobic	AP042421	Not reported	N.A.	155.004	206.005	Flye	5254420	61.76	Complete	1	1	1	0	0	0	0	1	5254420	1	5254420	4368	356.8	89	6	2	2	2	48	1	100	100	4.94	99.09	1.82	0
JCM 9492	Aquifex pyrophilus	Type	Bacteria; Pseudomonadati; Aquificota; Aquificia; Aquificales; Aquificaceae	Microaerophilic	BAAHXJ000000000	Not reported	N.A.	81.4365	1610.52	Hybracter	1624701	45	Draft	16	3	0	3	0	0	1	1	405349	2	576301	1777	290.7	95.4	2	0	1	1	42	16	100	100	0.47	99.19	0.81	66.67
JCM 13302	Hydrogenivirga okinawensis	Type	Bacteria; Pseudomonadati; Aquificota; Aquificia; Aquificales; Aquificaceae	Anaerobic	AP042386	Not reported	105.721	N.A.	N.A.	Flye	1829618	49.18	Complete	1	1	1	0	0	0	2	3	1829618	1	1829618	2042	287.9	96.4	3	1	1	1	49	1	98.85	99.95	0.12	98.37	2.1	0
JCM 10560	Hydrogenobacter subterraneus	Type	Bacteria; Pseudomonadati; Aquificota; Aquificia; Aquificales; Aquificaceae	Aerobic	AP042473	Not reported	N.A.	1037.15	727.477	Flye	1675895	43.21	Complete	1	1	1	0	0	0	0	0	1675895	1	1675895	1808	295	95.5	3	1	1	1	46	1	100	99.99	0.1	99.59	0	0
JCM 8795	Hydrogenobaculum acidophilum	Type	Bacteria; Pseudomonadati; Aquificota; Aquificia; Aquificales; Aquificaceae	Microaerophilic	BAAHXP000000000	Not reported	N.A.	N.A.	652.161	Unicycler	1692216	35.02	Draft	57	1	0	1	0	0	0	1	92619	6	213063	1725	301.7	92.3	3	1	1	1	43	57	98.14	100	0.22	100	0	0
JCM 12825	Desulfurobacterium crinifex	Type	Bacteria; Pseudomonadati; Aquificota; Aquificia; Desulfurobacteriales; Desulfurobacteriaceae	Anaerobic	BAAHXO000000000	Not reported	10.4144	N.A.	N.A.	Hybracter	2071328	39.65	Complete	5	4	1	3	0	0	4	3	1790576	1	1790576	2192	292.3	92.8	6	2	2	2	46	5	100	99.99	0	99.16	2.53	28.57
JCM 12127	Desulfurobacterium pacificum	Type	Bacteria; Pseudomonadati; Aquificota; Aquificia; Desulfurobacteriales; Desulfurobacteriaceae	Anaerobic	AP042388	FXUB01000000	99.0984	N.A.	N.A.	Flye	1602177	40.02	Complete	1	1	1	0	0	0	0	0	1602177	1	1602177	1663	307.8	95.8	6	2	2	2	44	1	99.97	99.92	0	100	1.27	0
JCM 11468	Thermovibrio ruber	Type	Bacteria; Pseudomonadati; Aquificota; Aquificia; Desulfurobacteriales; Desulfurobacteriaceae	Anaerobic	AP042397	Not reported	26.191	N.A.	N.A.	Flye	1504690	44.58	Complete	1	1	1	0	0	0	0	0	1504690	1	1504690	1537	310.4	95.1	7	3	2	2	45	1	99.04	99.9	0.03	99.37	0.84	50
JCM 14244	Venenivibrio stagnispumantis	Type	Bacteria; Pseudomonadati; Aquificota; Aquificia; Hydrogenothermales; Hydrogenothermaceae	Microaerophilic	BAAHXM000000000	FXTX01000000	N.A.	121.891	1516.34	Hybracter	1627971	29.2	Complete	6	4	1	3	0	0	0	0	1580841	1	1580841	1713	294	92.8	6	2	2	2	38	6	99.15	99.93	0.38	99.19	1.63	0
JCM 10556	Bacteroides acidifaciens	Type	Bacteria; Pseudomonadati; Bacteroidota; Bacteroidia; Bacteroidales; Bacteroidaceae	Anaerobic	BAAIEP000000000	BAIW00000000	N.A.	60.6614	504.261	Hybracter	5179879	43.09	Draft	5	0	0	0	0	0	16	11	3813453	1	3813453	4434	346.3	88.9	16	6	5	5	79	5	100	99.99	0.35	98.88	0	0
JCM 11017	Bacteroides fragilis	Non-type	Bacteria; Pseudomonadati; Bacteroidota; Bacteroidia; Bacteroidales; Bacteroidaceae	Anaerobic	BAAIHB000000000	Not reported	N.A.	N.A.	161.769	Unicycler	5259875	43.45	Draft	81	1	0	1	2	1	5	5	169290	11	367344	4355	356.5	88.5	2	1	0	1	59	81	100	99.99	1.69	99.26	0	0
JCM 12987	Bacteroides nordii	Type	Bacteria; Pseudomonadati; Bacteroidota; Bacteroidia; Bacteroidales; Bacteroidaceae	Anaerobic	AP043767, AP043768	BAJA00000000	98.5863	N.A.	N.A.	Flye	5689128	40.64	Complete	2	1	1	0	0	0	3	2	5678598	1	5678598	4368	387.3	89.2	15	5	5	5	71	2	98.44	99.83	0.23	99.26	0	0
JCM 10003	Bacteroides pyogenes	Non-type	Bacteria; Pseudomonadati; Bacteroidota; Bacteroidia; Bacteroidales; Bacteroidaceae	Anaerobic	AP043730	BAIU00000000	54.7175	N.A.	N.A.	Flye	3470196	46.24	Complete	1	1	1	0	0	0	1	1	3470196	1	3470196	2851	349.7	86.2	15	5	5	5	69	1	97.94	99.99	0	98.51	0.93	0
JCM 6292	Bacteroides pyogenes	Non-type	Bacteria; Pseudomonadati; Bacteroidota; Bacteroidia; Bacteroidales; Bacteroidaceae	Anaerobic	AP043705	BAIQ00000000	26.1073	N.A.	N.A.	Flye	3529281	45.74	Complete	1	1	1	0	0	0	3	3	3529281	1	3529281	2919	352.1	87.4	15	5	5	5	69	1	95.66	99.95	0.03	98.88	0.99	0
JCM 6294	Bacteroides pyogenes	Type	Bacteria; Pseudomonadati; Bacteroidota; Bacteroidia; Bacteroidales; Bacteroidaceae	Anaerobic	AP043706	BAIR00000000	52.7847	N.A.	N.A.	Flye	3529232	45.74	Complete	1	1	1	0	0	0	3	2	3529232	1	3529232	2917	352.4	87.4	15	5	5	5	68	1	95.66	99.95	0.03	98.88	0.99	0
JCM 10512	Bacteroides reticulotermitis	Type	Bacteria; Pseudomonadati; Bacteroidota; Bacteroidia; Bacteroidales; Bacteroidaceae	Anaerobic	AP043732	BAIV00000000	24.8849	N.A.	N.A.	Flye	5470359	43.26	Complete	1	1	1	0	0	0	5	4	5470359	1	5470359	4239	380.4	88.4	15	5	5	5	73	1	99.04	99.99	0.03	99.26	0.19	0
JCM 16496	Bacteroides rodentium	Type	Bacteria; Pseudomonadati; Bacteroidota; Bacteroidia; Bacteroidales; Bacteroidaceae	Anaerobic	BAAIEQ000000000	BAKJ00000000	N.A.	64.9737	262.485	Hybracter	5081263	47.01	Draft	3	0	0	0	0	0	6	0	4589834	1	4589834	4204	361.6	89.7	12	4	4	4	63	3	99.31	99.98	1.17	99.26	0.31	0
JCM 15092	Phocaeicola paurosaccharolyticus	Type	Bacteria; Pseudomonadati; Bacteroidota; Bacteroidia; Bacteroidales; Bacteroidaceae	Anaerobic	AP043785	BAJR00000000	N.A.	104.971	493.48	Flye	3518471	37.14	Complete	1	1	1	0	0	0	1	3	3518471	1	3518471	2822	374	90	18	6	6	6	71	1	99.17	99.88	0	98.88	0.37	0
JCM 17136	Phocaeicola sartorii	Type	Bacteria; Pseudomonadati; Bacteroidota; Bacteroidia; Bacteroidales; Bacteroidaceae	Anaerobic	BAAIFW000000000	BAKM00000000	74.4257	N.A.	N.A.	Hybracter	5462188	43.82	Draft	6	0	0	0	1	0	4	0	4099611	1	4099611	4483	363.2	89.4	21	7	7	7	79	6	99.47	99.98	0.29	98.88	0.19	0
JCM 30204	Dysgonomonas termitidis	Type	Bacteria; Pseudomonadati; Bacteroidota; Bacteroidia; Bacteroidales; Dysgonomonadaceae	Anaerobic	BAAHYD000000000	Not reported	15.6205	N.A.	N.A.	Hybracter	6898220	41.14	Draft	3	0	0	0	0	0	17	13	4114651	1	4114651	5661	357.5	88	12	4	4	4	49	3	99.65	100	0.83	99.73	1.37	0
JCM 12565	Petrimonas sulfuriphila	Type	Bacteria; Pseudomonadati; Bacteroidota; Bacteroidia; Bacteroidales; Dysgonomonadaceae	Anaerobic	AP042451	Not reported	20.0468	N.A.	N.A.	Flye	3902297	43.7	Complete	1	1	1	0	0	0	3	2	3902297	1	3902297	3320	359.6	91.8	6	2	2	2	50	1	99.41	100	0.15	100	1.09	0
JCM 15907	Porphyromonas gingivicanis	Type	Bacteria; Pseudomonadati; Bacteroidota; Bacteroidia; Bacteroidales; Porphyromonadaceae	Anaerobic	AP043801, AP043802	BAKX00000000	82.1462	N.A.	N.A.	Flye	2085170	42.76	Complete	2	2	1	1	1	0	2	3	2064489	1	2064489	1701	352.3	86.2	9	3	3	3	49	2	100	99.94	0.09	95.83	0.21	0
JCM 17484	Hoylesella saccharolytica	Type	Bacteria; Pseudomonadati; Bacteroidota; Bacteroidia; Bacteroidales; Prevotellaceae	Anaerobic	AP043839	BAKN00000000	28.1574	N.A.	N.A.	Flye	3034309	43.4	Complete	1	1	1	0	0	0	1	1	3034309	1	3034309	2421	358.7	85.9	12	4	4	4	57	1	99.12	99.85	0.01	99.66	0	0
JCM 15640	Hoylesella timonensis	Type	Bacteria; Pseudomonadati; Bacteroidota; Bacteroidia; Bacteroidales; Prevotellaceae	Anaerobic	BAAIFM000000000	BAKE00000000	61.7671	N.A.	N.A.	Hybracter	3311215	42.5	Complete	1	1	1	0	0	0	0	0	3311215	1	3311215	2821	337.9	86.4	12	4	4	4	52	1	100	99.98	0.12	99.29	0	0
JCM 15754	Prevotella aurantiaca	Type	Bacteria; Pseudomonadati; Bacteroidota; Bacteroidia; Bacteroidales; Prevotellaceae	Anaerobic	BAAIFQ000000000	BAKF00000000	N.A.	71.6971	388.266	Hybracter	3206614	39.2	Draft	6	0	0	0	0	0	2	2	2247780	1	2247780	2685	333.2	83.7	12	4	4	4	48	6	100	99.99	1.1	99.29	0	0
JCM 15908	Prevotella dentasini	Type	Bacteria; Pseudomonadati; Bacteroidota; Bacteroidia; Bacteroidales; Prevotellaceae	Anaerobic	BAAIFX000000000	BAKG00000000	0.026323	N.A.	445.847	Unicycler	2360611	50.44	Draft	23	0	0	0	1	0	1	0	235776	4	431597	1942	338.8	83.6	3	1	1	1	47	23	94.95	86.57	0.05	90.43	0	0
JCM 13449	Prevotella denticola	Type	Bacteria; Pseudomonadati; Bacteroidota; Bacteroidia; Bacteroidales; Prevotellaceae	Anaerobic	AP043771, AP043772	BAJG00000000	33.7551	N.A.	N.A.	Flye	3170192	49.95	Complete	2	2	1	1	0	0	1	0	1949961	1	1949961	2560	350.2	84.8	14	6	4	4	51	2	99.48	99.98	0.94	99.21	0	0
JCM 15124	Prevotella falsenii	Type	Bacteria; Pseudomonadati; Bacteroidota; Bacteroidia; Bacteroidales; Prevotellaceae	Anaerobic	BAAIFV000000000	BAJY00000000	N.A.	14.0011	469.608	Unicycler	2836001	44.02	Draft	40	0	0	0	3	0	3	5	185498	4	683138	2383	334.9	84.4	2	1	0	1	44	40	98.56	99.94	0.11	99.32	0	0
JCM 17724	Prevotella fusca	Type	Bacteria; Pseudomonadati; Bacteroidota; Bacteroidia; Bacteroidales; Prevotellaceae	Anaerobic	BAAIFR000000000	BAKO00000000	10.9869	N.A.	N.A.	Hybracter	3261182	44.12	Draft	2	1	0	1	0	0	1	1	1827624	1	1827624	2731	324	81.4	13	5	4	4	49	2	100	99.44	0.12	99.32	0	0
JCM 15637	Prevotella histicola	Type	Bacteria; Pseudomonadati; Bacteroidota; Bacteroidia; Bacteroidales; Prevotellaceae	Anaerobic	AP043793, AP043794	BAJX00000000	54.2348	N.A.	N.A.	Flye	2989316	41.32	Complete	2	2	1	1	0	0	1	1	2176503	1	2176503	2399	349.1	84	13	5	4	4	53	2	100	99.89	0.02	99.32	0	0
JCM 17725	Prevotella scopos	Type	Bacteria; Pseudomonadati; Bacteroidota; Bacteroidia; Bacteroidales; Prevotellaceae	Anaerobic	AP043848, AP043849	BAKP00000000	28.3273	N.A.	N.A.	Flye	3297307	40.76	Complete	2	2	1	1	0	0	1	1	1860421	1	1860421	2620	348.5	83.1	12	4	4	4	49	2	99.84	99.84	0.15	99.32	0.17	100
JCM 15579	Marinifilum fragile	Type	Bacteria; Pseudomonadati; Bacteroidota; Bacteroidia; Marinilabiliales; Marinifilaceae	Aerobic	BAAIGS000000000	BAZX00000000	N.A.	15.033	416.425	Hybracter	4824975	35.8	Draft	11	1	0	1	1	0	2	0	1328383	2	2076628	3910	356.5	86.7	16	6	5	5	88	11	99.64	99.99	1.56	100	1.88	0
JCM 15548	Geofilum rubicundum	Type	Bacteria; Pseudomonadati; Bacteroidota; Bacteroidia; Marinilabiliales; Marinilabiliaceae	Aerobic	AP043792	BAZW00000000	N.A.	25.9687	332.941	Flye	5202548	44.65	Complete	1	1	1	0	0	0	0	0	5202548	1	5202548	4210	367.7	89.3	12	4	4	4	48	1	98.69	100	1.09	98.91	1.09	0
JCM 15069	Lutaonella thermophila	Type	Bacteria; Pseudomonadati; Bacteroidota; Flavobacteriia; Flavobacteriales; Flavobacteriaceae	Aerobic	AP043783	Not reported	20.8131	N.A.	N.A.	Flye	2369922	34.39	Complete	1	1	1	0	0	0	1	1	2369922	1	2369922	2195	334.6	93	9	3	3	3	42	1	99.89	99.99	0.14	98.68	0.11	0
JCM 15747	Thiofractor thiocamini	Type	Bacteria; Pseudomonadati; Campylobacterota; Epsilonproteobacteria; Campylobacterales	Anaerobic	AP042389	Not reported	128.08	N.A.	N.A.	Flye	2240666	35.07	Complete	1	1	1	0	0	0	0	0	2240666	1	2240666	2201	321	94.6	4	0	2	2	40	1	100	100	0.14	99.68	2.12	0
JCM 2013	Campylobacter jejuni subsp. jejuni	Non-type	Bacteria; Pseudomonadati; Campylobacterota; Epsilonproteobacteria; Campylobacterales; Campylobacteraceae	Microaerophilic	AP043698, AP043699	Not reported	200.722	N.A.	N.A.	Flye	1691630	30.47	Complete	2	2	1	1	1	1	0	0	1641247	1	1641247	1718	307.7	93.8	6	0	3	3	44	2	100	99.99	0.03	99.52	0.16	0
JCM 12095	Helicobacter pylori	Non-type	Bacteria; Pseudomonadati; Campylobacterota; Epsilonproteobacteria; Campylobacterales; Helicobacteraceae	Microaerophilic	AP043749	Not reported	168.492	N.A.	N.A.	Flye	1682544	38.72	Complete	1	1	1	0	0	0	0	0	1682544	1	1682544	1597	319	90.8	4	0	2	2	36	1	100	99.99	0.06	99.77	0	0
JCM 19824	Sulfurovum aggregans	Type	Bacteria; Pseudomonadati; Campylobacterota; Epsilonproteobacteria; Campylobacterales; Sulfurovaceae	Anaerobic	AP042387	Not reported	11.4073	N.A.	N.A.	Flye	2337052	38.89	Complete	1	1	1	0	0	0	0	0	2337052	1	2337052	2317	301.6	89.7	6	0	3	3	46	1	100	99.99	0.47	99.59	1.84	20
JCM 11957	Caminibacter profundus	Type	Bacteria; Pseudomonadati; Campylobacterota; Epsilonproteobacteria; Nautiliales; Nautiliaceae	Anaerobic	BAAHXC000000000	Not reported	N.A.	196.399	825.233	Hybracter	1696866	28.57	Draft	3	1	0	1	0	0	1	2	1445150	1	1445150	1766	292	91.2	10	0	5	5	50	3	100	99.99	0	99.59	0.41	0
JCM 15390	Nautilia abyssi	Type	Bacteria; Pseudomonadati; Campylobacterota; Epsilonproteobacteria; Nautiliales; Nautiliaceae	Anaerobic	AP042376	Not reported	37.2897	N.A.	N.A.	Flye	1785770	34.43	Complete	1	1	1	0	0	0	0	0	1785770	1	1785770	1802	311.4	94.3	12	4	4	4	49	1	100	100	0.01	100	0.41	0
JCM 15786	Nautilia lithotrophica	Type	Bacteria; Pseudomonadati; Campylobacterota; Epsilonproteobacteria; Nautiliales; Nautiliaceae	Anaerobic	BAAHXN000000000	Not reported	N.A.	N.A.	712.727	Unicycler	1730462	32.01	Draft	9	0	0	0	0	0	0	0	878036	1	878036	1781	306.8	94.7	2	0	1	1	43	9	100	100	0	100	0.81	0
JCM 12457	Thioreductor micantisoli	Type	Bacteria; Pseudomonadati; Campylobacterota; Epsilonproteobacteria; Nautiliales; Thioreductoraceae	Anaerobic	AP043760, AP043761, AP043762, AP043763	Not reported	N.A.	26.1934	923.524	Flye	1709909	27.27	Complete	4	4	1	3	0	0	1	2	1662849	1	1662849	1766	305.1	94.5	6	0	3	3	50	4	100	100	0.11	99.59	1.02	0
JCM 15827	Desulfurispirillum alkaliphilum	Type	Bacteria; Pseudomonadati; Chrysiogenota; Chrysiogenia; Chrysiogenales; Chrysiogenaceae	Anaerobic	AP042405	Not reported	35.4931	N.A.	N.A.	Flye	2944714	56.12	Complete	1	1	1	0	0	0	0	0	2944714	1	2944714	2622	332.4	88.8	9	3	3	3	37	1	99.24	99.99	0.08	94.77	0	0
JCM 17152	Oligosphaera ethanolica	Type	Bacteria; Pseudomonadati; Lentisphaerota; Oligosphaeria; Oligosphaerales; Oligosphaeraceae	Anaerobic	AP042472	JAUSVL010000000	N.A.	418.357	241.11	Flye	5729291	60.21	Complete	1	1	1	0	0	0	1	2	5729291	1	5729291	3892	416.4	84.9	9	3	3	3	55	1	94.09	97.03	0.65	90.5	2.23	0
JCM 13213	Thermodesulfovibrio aggregans	Type	Bacteria; Pseudomonadati; Nitrospirota; Thermodesulfovibrionia; Thermodesulfovibrionales; Thermodesulfovibrionaceae	Anaerobic	AP043770	BCNO00000000	3.78297	119.074	597.243	Flye	1992120	34.91	Complete	1	1	1	0	0	0	0	0	1992120	1	1992120	1995	313.6	94.2	3	1	1	1	47	1	98.86	99.99	0	100	0.91	0
JCM 13991	Thermodesulfovibrio hydrogeniphilus	Type	Bacteria; Pseudomonadati; Nitrospirota; Thermodesulfovibrionia; Thermodesulfovibrionales; Thermodesulfovibrionaceae	Anaerobic	BAAHYW000000000	Not reported	45.8495	N.A.	N.A.	Hybracter	2309952	35.94	Draft	2	0	0	0	0	0	0	0	2276971	1	2276971	2262	299.8	88.1	3	1	1	1	46	2	98.32	99.97	0.08	99.03	0	0
JCM 17478	Thermopirellula anaerolimosa	Type	Bacteria; Pseudomonadati; Planctomycetota; Planctomycetia	Anaerobic	BAAHYX000000000	Not reported	N.A.	434.977	265.911	Hybracter	5188120	61.75	Draft	10	0	0	0	0	0	12	8	3267442	1	3267442	3782	388.6	85	3	1	1	1	48	10	94.18	99.96	0.27	97.63	0	0
JCM 19991	Thermogutta hypogea	Type	Bacteria; Pseudomonadati; Planctomycetota; Planctomycetia; Pirellulales; Thermoguttaceae	Anaerobic	AP042425	Not reported	231.374	N.A.	N.A.	Flye	4666513	62.46	Complete	1	1	1	0	0	0	1	1	4666513	1	4666513	3378	392.1	85.2	3	1	1	1	46	1	97.46	99.94	0.19	98.85	0	0
JCM 19992	Thermostilla marina	Type	Bacteria; Pseudomonadati; Planctomycetota; Planctomycetia; Pirellulales; Thermoguttaceae	Anaerobic	BAAHYR000000000	Not reported	10.5259	N.A.	496.296	Hybracter	4964401	60.35	Draft	2	0	0	0	0	0	1	2	4947103	1	4947103	3593	400.3	86.9	3	1	1	1	48	2	98.26	99.02	0.48	98.85	0	0
JCM 25146	Acetobacter okinawensis	Type	Bacteria; Pseudomonadati; Pseudomonadota; Alphaproteobacteria; Acetobacterales; Acetobacteraceae	Aerobic	AP043921, AP043922	BAJU00000000	N.A.	38.9652	309.197	Flye	3228164	57.6	Complete	2	2	1	1	1	0	1	3	3018360	1	3018360	3007	319.4	89.2	15	5	5	5	57	2	100	100	0.41	100	0.25	0
JCM 25330	Acetobacter persici	Type	Bacteria; Pseudomonadati; Pseudomonadota; Alphaproteobacteria; Acetobacterales; Acetobacteraceae	Aerobic	AP043923	BAJW00000000	28.7537	N.A.	N.A.	Flye	3794388	57.19	Complete	1	1	1	0	0	0	2	4	3794388	1	3794388	3439	327.5	89	12	4	4	4	56	1	100	100	0.92	100	1.49	0
JCM 15831	Asaia astilbis	Type	Bacteria; Pseudomonadati; Pseudomonadota; Alphaproteobacteria; Acetobacterales; Acetobacteraceae	Aerobic	BAAIEM000000000	BAJT00000000	N.A.	89.5783	286.82	Hybracter	3227628	58.01	Complete	3	1	1	0	2	0	4	3	3163923	1	3163923	2899	331	89.2	15	5	5	5	59	3	100	99.88	1.14	99.75	0	0
JCM 25414	Asaia platycodi	Type	Bacteria; Pseudomonadati; Pseudomonadota; Alphaproteobacteria; Acetobacterales; Acetobacteraceae	Aerobic	AP043925	BAKW00000000	39.9105	N.A.	N.A.	Flye	3183544	59.29	Complete	1	1	1	0	0	0	3	3	3183544	1	3183544	2790	340.5	89.5	15	5	5	5	57	1	100	100	0.24	100	0	0
JCM 25354	Asaia prunellae	Type	Bacteria; Pseudomonadati; Pseudomonadota; Alphaproteobacteria; Acetobacterales; Acetobacteraceae	Aerobic	AP043924	BAJV00000000	N.A.	137.243	306.831	Flye	3210637	55.78	Complete	1	1	1	0	0	0	4	4	3210637	1	3210637	2859	336.7	89.9	15	5	5	5	59	1	99.99	99.99	0.1	100	0	0
JCM 21176	Gluconobacter cerinus	Non-type	Bacteria; Pseudomonadati; Pseudomonadota; Alphaproteobacteria; Acetobacterales; Acetobacteraceae	Aerobic	AP043906, AP043907, AP043908, AP043909, AP043910	Not reported	10.5251	N.A.	N.A.	Flye	3433613	55.9	Complete	5	2	1	1	4	2	6	5	3102448	1	3102448	3299	314.3	90.6	15	5	5	5	61	5	100	99.99	0.2	100	0	0
JCM 25156	Komagataeibacter kakiaceti	Type	Bacteria; Pseudomonadati; Pseudomonadota; Alphaproteobacteria; Acetobacterales; Acetobacteraceae	Aerobic	BAAIFT000000000	BAIO00000000	24.0413	N.A.	N.A.	Hybracter	3501158	62.8	Draft	7	4	0	4	2	1	7	9	2607146	1	2607146	3260	312.4	87.3	15	5	5	5	57	7	100	100	1.18	100	0.25	0
JCM 16408	Methylobacterium phyllosphaerae	Type	Bacteria; Pseudomonadati; Pseudomonadota; Alphaproteobacteria; Hyphomicrobiales; Methylobacteriaceae	Aerobic	BAAIFU000000000	BBDH000000000	1.00452	N.A.	572.849	Unicycler	6207419	69.57	Draft	85	1	0	1	11	2	1	4	203715	10	515633	5716	305.3	84.3	7	2	2	3	56	85	99.22	99.98	0.28	99.69	0	0
JCM 2811	Methylorubrum rhodinum	Type	Bacteria; Pseudomonadati; Pseudomonadota; Alphaproteobacteria; Hyphomicrobiales; Methylobacteriaceae	Aerobic	BAAIEK000000000	BAZM000000000	8.77983	N.A.	N.A.	Hybracter	5486532	69.87	Draft	8	1	0	1	1	0	1	2	980440	2	1990552	5065	309.5	85.7	8	0	4	4	56	8	99.95	99.97	0.23	99.69	0	0
JCM 10893	Methylorubrum thiocyanatum	Type	Bacteria; Pseudomonadati; Pseudomonadota; Alphaproteobacteria; Hyphomicrobiales; Methylobacteriaceae	Aerobic	AP043737, AP043738, AP043739	BAZP000000000	21.7884	N.A.	N.A.	Flye	5665914	69.24	Complete	3	3	1	2	2	0	1	3	5573968	1	5573968	5273	308.5	86.1	10	0	5	5	59	3	100	100	0.91	99.69	0	0
JCM 18382	Bradyrhizobium sp.	Non-type	Bacteria; Pseudomonadati; Pseudomonadota; Alphaproteobacteria; Hyphomicrobiales; Nitrobacteraceae	Aerobic	BAAIGB000000000	Not reported	28.9554	N.A.	N.A.	Hybracter	7763201	64.44	Draft	3	1	0	1	1	0	4	3	7567638	1	7567638	7165	314.5	87.1	3	1	1	1	51	3	97.8	100	0.21	99.89	0.15	0
JCM 21793	Nitratireductor aquibiodomus	Type	Bacteria; Pseudomonadati; Pseudomonadota; Alphaproteobacteria; Hyphomicrobiales; Phyllobacteriaceae	Aerobic	AP043916, AP043917, AP043918, AP043919	BAMP00000000	67.5899	N.A.	N.A.	Flye	4551296	61.38	Complete	4	4	1	3	3	1	3	3	4098143	1	4098143	4312	316.5	90	6	2	2	2	48	4	100	99.91	0.97	99.92	0.55	0
JCM 30711	Micropepsis pineolensis	Type	Bacteria; Pseudomonadati; Pseudomonadota; Alphaproteobacteria; Micropepsales; Micropepsaceae	Anaerobic	AP042408	Not reported	11.9047	N.A.	N.A.	Flye	3443707	57.73	Complete	1	1	1	0	0	0	3	2	3443707	1	3443707	2988	343.4	89.4	9	3	3	3	50	1	100	98.91	0.31	97.46	0.52	0
JCM 14636	Piezobacter thermophilus	Type	Bacteria; Pseudomonadati; Pseudomonadota; Alphaproteobacteria; Rhodobacterales; Paracoccaceae	Microaerophilic	AP042380, AP042381, AP042382	Not reported	31.4258	N.A.	N.A.	Flye	3519715	66.64	Complete	3	3	1	2	1	2	5	4	3286222	1	3286222	3330	320	90.8	6	2	2	2	46	3	100	100	0.21	99.04	0.43	0
JCM 21060	Rhodocista centenaria	Type	Bacteria; Pseudomonadati; Pseudomonadota; Alphaproteobacteria; Rhodospirillales; Azospirillaceae	Aerobic	AP043904, AP043905	Not reported	41.9995	N.A.	N.A.	Flye	4355489	70.46	Complete	2	2	1	1	0	0	5	3	3294796	1	3294796	3917	326.7	88.2	12	4	4	4	53	2	100	100	0.2	99.56	0	0
JCM 19705	Fodinicurvata halophila	Type	Bacteria; Pseudomonadati; Pseudomonadota; Alphaproteobacteria; Rhodospirillales; Fodinicurvataceae	Aerobic	AP043889	JBHTMR010000000	292.532	N.A.	N.A.	Flye	3845258	62.45	Complete	1	1	1	0	0	0	1	0	3845258	1	3845258	3558	325.1	90.2	6	2	2	2	50	1	100	99.99	0.55	100	0.58	0
JCM 17960	Magnetospira thiophila	Type	Bacteria; Pseudomonadati; Pseudomonadota; Alphaproteobacteria; Rhodospirillales; Magnetospiraceae	Microaerophilic	BAAHXF000000000	Not reported	N.A.	363.687	418.201	Hybracter	3664293	61.16	Draft	3	0	0	0	1	0	1	0	1991860	1	1991860	3474	321.6	91.5	6	2	2	2	50	3	99.54	100	0.49	99.5	1.16	0
JCM 23214	Sneathiella glossodoripedis	Type	Bacteria; Pseudomonadati; Pseudomonadota; Alphaproteobacteria; Sneathiellales; Sneathiellaceae	Aerobic	AP043920	BAMS00000000	39.5864	N.A.	N.A.	Flye	3643617	46.97	Complete	1	1	1	0	0	0	2	2	3643617	1	3643617	3452	321.3	91.3	9	3	3	3	48	1	100	100	0	100	0.87	0
JCM 12421	Thiobacter subterraneus	Type	Bacteria; Pseudomonadati; Pseudomonadota; Betaproteobacteria; Burkholderiales	Microaerophilic	AP042402	Not reported	99.1194	N.A.	N.A.	Flye	2751728	66.67	Complete	1	1	1	0	0	0	1	1	2751728	1	2751728	2653	318.1	92	6	2	2	2	47	1	100	99.98	0	98.58	2.6	0
JCM 16107	Thiomonas islandica	Type	Bacteria; Pseudomonadati; Pseudomonadota; Betaproteobacteria; Burkholderiales	Aerobic	AP042391	Not reported	23.3702	N.A.	N.A.	Flye	2891380	65.21	Complete	1	1	1	0	0	0	0	0	2891380	1	2891380	2707	323.5	90.9	3	1	1	1	44	1	99.24	100	0.02	99.79	0	0
JCM 18799	Achromobacter sp.	Non-type	Bacteria; Pseudomonadati; Pseudomonadota; Betaproteobacteria; Burkholderiales; Alcaligenaceae	Aerobic	AP043865, AP043866, AP043867	Not reported	53.0303	N.A.	N.A.	Flye	7232887	65.63	Complete	3	3	1	2	2	3	3	2	7116800	1	7116800	6697	325.6	90.4	13	5	4	4	57	3	100	100	1.29	99.53	0.47	0
JCM 9787	Achromobacter xylosoxidans	Non-type	Bacteria; Pseudomonadati; Pseudomonadota; Betaproteobacteria; Burkholderiales; Alcaligenaceae	Aerobic	AP043713	Not reported	55.4828	N.A.	N.A.	Flye	6775260	67.63	Complete	1	1	1	0	0	1	1	1	6775260	1	6775260	6186	331.8	90.9	13	5	4	4	59	1	100	100	1.37	99.53	0.5	0
JCM 20666	Alcaligenes faecalis	Non-type	Bacteria; Pseudomonadati; Pseudomonadota; Betaproteobacteria; Burkholderiales; Alcaligenaceae	Aerobic	AP043902	Not reported	96.2807	N.A.	N.A.	Flye	4190829	56.4	Complete	1	1	1	0	0	1	3	3	4190829	1	4190829	3839	324	89	9	3	3	3	59	1	99.53	100	0.51	100	0.12	0
JCM 10599	Paraburkholderia kururiensis	Type	Bacteria; Pseudomonadati; Pseudomonadota; Betaproteobacteria; Burkholderiales; Burkholderiaceae	Aerobic	BAAIEL000000000	BAMQ000000000	15.4986	N.A.	N.A.	Hybracter	7646841	64.79	Draft	5	2	0	2	2	0	0	0	2900521	2	3028974	6709	328.6	86.5	8	0	4	4	59	5	98.64	100	0.31	99.95	1.1	66.67
JCM 19000	Silvimonas sp.	Non-type	Bacteria; Pseudomonadati; Pseudomonadota; Betaproteobacteria; Neisseriales; Chitinibacteraceae	Aerobic	BAAIHC000000000	Not reported	N.A.	N.A.	185.237	Unicycler	4798123	60.02	Draft	72	0	0	0	3	0	2	6	155133	10	542565	4266	329.1	87.8	0	0	0	0	52	72	100	100	0.39	99.57	1.07	0
JCM 12992	Neisseria mucosa	Type	Bacteria; Pseudomonadati; Pseudomonadota; Betaproteobacteria; Neisseriales; Neisseriaceae	Aerobic	AP043769	Not reported	46.1371	N.A.	N.A.	Flye	2688421	51.1	Complete	1	1	1	0	0	0	0	0	2688421	1	2688421	2456	299.4	82.1	12	4	4	4	61	1	100	100	0.15	99.92	0.23	50
JCM 2850	Methylobacillus glycogenes	Type	Bacteria; Pseudomonadati; Pseudomonadota; Betaproteobacteria; Nitrosomonadales; Methylophilaceae	Aerobic	AP043702	BAMT00000000	35.8678	N.A.	N.A.	Revio	3267308	53.45	Complete	1	1	1	0	0	0	1	1	3267308	1	3267308	2982	325.8	89.2	6	2	2	2	46	1	100	99.99	0	99.57	0	0
JCM 15047	Thiobacillus thiophilus	Type	Bacteria; Pseudomonadati; Pseudomonadota; Betaproteobacteria; Nitrosomonadales; Thiobacillaceae	Anaerobic	AP042404	Not reported	78.3498	N.A.	N.A.	Flye	3332510	62.12	Complete	1	1	1	0	0	1	0	2	3332510	1	3332510	3245	304	88.8	6	2	2	2	45	1	100	99.99	4.54	99.53	0.71	0
JCM 12309	Thauera sp.	Non-type	Bacteria; Pseudomonadati; Pseudomonadota; Betaproteobacteria; Rhodocyclales; Zoogloeaceae	Aerobic	AP043752	Not reported	33.7532	N.A.	N.A.	Flye	4553146	68.45	Complete	1	1	1	0	0	0	2	1	4553146	1	4553146	4061	335.4	89.7	12	4	4	4	58	1	99.11	100	0.34	99.9	0.52	0
JCM 14267	Alkalimonas collagenimarina	Type	Bacteria; Pseudomonadati; Pseudomonadota; Gammaproteobacteria	Aerobic	AP043778	JAUZVZ010000000	31.2117	N.A.	N.A.	Flye	3925287	48.49	Complete	1	1	1	0	0	0	0	0	3925287	1	3925287	3515	338	90.8	15	5	5	5	68	1	98.62	100	0.79	99.66	0.3	0
JCM 14758	Shewanella algae	Non-type	Bacteria; Pseudomonadati; Pseudomonadota; Gammaproteobacteria; Alteromonadales; Shewanellaceae	Aerobic	AP043779, AP043780	BALL00000000	96.8666	N.A.	N.A.	Flye	5059530	52.92	Complete	2	2	1	1	1	2	0	2	4902619	1	4902619	4464	330	87.3	25	9	8	8	107	2	98.49	100	0.16	99.73	0.71	0
JCM 15074	Shewanella marina	Type	Bacteria; Pseudomonadati; Pseudomonadota; Gammaproteobacteria; Alteromonadales; Shewanellaceae	Aerobic	AP043784	BALM00000000	66.4298	N.A.	N.A.	Flye	4542382	40.57	Complete	1	1	1	0	0	0	3	2	4542382	1	4542382	3853	340	86.5	48	17	16	15	189	1	98.32	99.99	1.32	97.63	1.36	0
JCM 17961	Endothiovibrio diazotrophicus	Type	Bacteria; Pseudomonadati; Pseudomonadota; Gammaproteobacteria; Chromatiales; Thioalkalispiraceae	Microaerophilic	BAAHXB000000000	Not reported	N.A.	N.A.	205.619	Unicycler	6107404	66.61	Draft	310	0	0	0	7	0	5	6	44244	44	171154	4967	338.4	82.6	3	1	1	1	48	310	99.95	100	0.29	98.47	1.65	0
JCM 14586	Thioprofundum lithotrophicum	Type	Bacteria; Pseudomonadati; Pseudomonadota; Gammaproteobacteria; Chromatiales; Thioprofundaceae	Microaerophilic	AP042379	Not reported	64.9993	N.A.	N.A.	Flye	2948094	65.55	Complete	1	1	1	0	0	0	0	1	2948094	1	2948094	2748	317.6	88.8	3	1	1	1	42	1	99.8	100	0.05	98.94	1.94	0
JCM 20135	Escherichia coli	Non-type	Bacteria; Pseudomonadati; Pseudomonadota; Gammaproteobacteria; Enterobacterales; Enterobacteriaceae	Aerobic	AP043893, AP043894	Not reported	146.796	N.A.	N.A.	Flye	5034933	50.64	Complete	2	2	1	1	1	1	5	5	4903600	1	4903600	4706	312.8	87.7	22	8	7	7	87	2	100	100	1.26	99.96	0.62	0
JCM 20051	Raoultella sp.	Non-type	Bacteria; Pseudomonadati; Pseudomonadota; Gammaproteobacteria; Enterobacterales; Enterobacteriaceae	Aerobic	AP043892	Not reported	86.7262	N.A.	N.A.	Flye	5410868	55.87	Complete	1	1	1	0	0	0	2	2	5410868	1	5410868	4936	319.6	87.5	25	9	8	8	86	1	98.75	100	0.98	99.99	0.39	0
JCM 6977	Salmonella enterica subsp. enterica	Non-type	Bacteria; Pseudomonadati; Pseudomonadota; Gammaproteobacteria; Enterobacterales; Enterobacteriaceae	Aerobic	BAAIGZ000000000	Not reported	N.A.	N.A.	185.649	Unicycler	4785978	52.19	Draft	77	0	0	0	7	2	15	16	222242	7	609808	4466	309.3	86.6	2	2	0	0	69	77	97.44	100	0.08	97.15	0.08	0
JCM 19379	Methyloparacoccus murrellii	Type	Bacteria; Pseudomonadati; Pseudomonadota; Gammaproteobacteria; Methylococcales; Methylococcaceae	Aerobic	BAAHXD000000000	Not reported	N.A.	N.A.	454.813	Unicycler	3262902	65.44	Draft	120	0	0	0	5	4	1	3	55616	20	120427	2943	325.6	88.1	2	1	1	0	45	120	98.73	99.82	0.01	99.74	1.12	0
JCM 14076	Methylosoma difficile	Type	Bacteria; Pseudomonadati; Pseudomonadota; Gammaproteobacteria; Methylococcales; Methylococcaceae	Aerobic	BAAHYJ000000000	Not reported	N.A.	3.01888	748.436	Unicycler	3605327	48.41	Draft	16	1	0	1	1	0	1	2	882786	2	1128372	3349	319.5	89	6	2	2	2	41	16	97.38	99.99	0.17	98.73	0.25	0
JCM 13664	Methylothermus subterraneus	Type	Bacteria; Pseudomonadati; Pseudomonadota; Gammaproteobacteria; Methylococcales; Methylothermaceae	Aerobic	BAAHXK000000000	Not reported	N.A.	N.A.	720.292	Unicycler	2292163	60.55	Draft	40	0	0	0	3	0	0	0	199221	5	359699	2218	324.5	94.2	2	1	0	1	45	40	96.25	95.33	0.01	93.44	0	0
JCM 18900	Psychrobacter sp.	Non-type	Bacteria; Pseudomonadati; Pseudomonadota; Gammaproteobacteria; Moraxellales; Moraxellaceae	Aerobic	AP043869, AP043870	BAWG00000000	36.3196	N.A.	N.A.	Flye	3292555	42.82	Complete	2	2	1	1	1	0	0	0	3234940	1	3234940	2671	340	82.7	9	3	3	3	47	2	100	100	0.03	99.67	0.69	0
JCM 18901	Psychrobacter sp.	Non-type	Bacteria; Pseudomonadati; Pseudomonadota; Gammaproteobacteria; Moraxellales; Moraxellaceae	Aerobic	AP043871	BAWH00000000	33.3833	N.A.	N.A.	Flye	3181153	42.81	Complete	1	1	1	0	0	0	1	0	3181153	1	3181153	2599	339.1	83.1	9	3	3	3	47	1	99.91	99.98	0.01	99.81	0.55	0
JCM 18902	Psychrobacter sp.	Non-type	Bacteria; Pseudomonadati; Pseudomonadota; Gammaproteobacteria; Moraxellales; Moraxellaceae	Aerobic	AP043872, AP043873	BAWI00000000	104.122	N.A.	N.A.	Flye	3308282	42.95	Complete	2	2	1	1	1	1	0	1	3260383	1	3260383	2696	338.2	82.7	15	5	5	5	53	2	99.92	99.96	0.18	100	0.27	0
JCM 18903	Psychrobacter sp.	Non-type	Bacteria; Pseudomonadati; Pseudomonadota; Gammaproteobacteria; Moraxellales; Moraxellaceae	Aerobic	AP043874, AP043875, AP043876, AP043877	BAWJ00000000	64.201	N.A.	N.A.	Revio	3551736	42.7	Complete	4	3	1	2	3	3	0	0	3423218	1	3423218	2945	332.8	82.8	15	5	5	5	51	4	100	99.99	0.97	100	1.37	90
JCM 16084	Halomonas beimenensis	Type	Bacteria; Pseudomonadati; Pseudomonadota; Gammaproteobacteria; Oceanospirillales; Halomonadaceae	Aerobic	AP043810	BAAADT010000000	128.336	N.A.	N.A.	Hybracter	4053137	68.4	Complete	1	1	1	0	0	0	1	1	4053137	1	4053137	3688	326	89	15	5	5	5	73	1	100	99.98	0.26	100	0.59	0
JCM 16914	Halomonas cibimaris	Type	Bacteria; Pseudomonadati; Pseudomonadota; Gammaproteobacteria; Oceanospirillales; Halomonadaceae	Aerobic	AP043828	BAAAZT010000000	163.839	N.A.	N.A.	Flye	2676578	62.96	Complete	1	1	1	0	0	0	0	0	2676578	1	2676578	2395	332.2	89.2	18	6	6	6	64	1	99.88	100	0.05	97.15	0.43	0
JCM 30151	Halomonas garicola	Type	Bacteria; Pseudomonadati; Pseudomonadota; Gammaproteobacteria; Oceanospirillales; Halomonadaceae	Aerobic	AP043930, AP043931	JASSZF010000000	156.246	N.A.	N.A.	Flye	2945007	63.55	Complete	2	2	1	1	1	0	1	0	2915535	1	2915535	2680	323.7	88.4	18	6	6	6	63	2	99.98	99.99	0.18	98.01	0.97	0
JCM 14803	Halomonas salifodinae	Type	Bacteria; Pseudomonadati; Pseudomonadota; Gammaproteobacteria; Oceanospirillales; Halomonadaceae	Aerobic	AP043781	BAAADR010000000	73.8889	N.A.	N.A.	Flye	4392743	66.65	Complete	1	1	1	0	0	0	2	3	4392743	1	4392743	4001	324.3	88.6	15	5	5	5	69	1	99.52	99.94	0.05	100	0.43	0
JCM 21221	Halomonas salina	Type	Bacteria; Pseudomonadati; Pseudomonadota; Gammaproteobacteria; Oceanospirillales; Halomonadaceae	Aerobic	AP043911	JASFAS010000000	301.643	N.A.	N.A.	Flye	3562246	68.02	Complete	1	1	1	0	0	0	3	4	3562246	1	3562246	3255	326.3	89.4	15	5	5	5	73	1	99.66	99.92	0	99.93	0.48	0
JCM 19368	Halomonas shantousis	Type	Bacteria; Pseudomonadati; Pseudomonadota; Gammaproteobacteria; Oceanospirillales; Halomonadaceae	Aerobic	BAAIER000000000	BAAGQV010000000	99.96	N.A.	N.A.	Hybracter	4078808	61.78	Complete	2	2	1	1	0	0	2	2	3917584	1	3917584	3614	328.6	87.3	17	6	6	5	75	2	100	100	0.05	100	0.57	0
JCM 20774	Marinomonas vaga	Type	Bacteria; Pseudomonadati; Pseudomonadota; Gammaproteobacteria; Oceanospirillales; Oceanospirillaceae	Aerobic	AP043903	Not reported	223.257	N.A.	N.A.	Flye	3774128	47.15	Complete	1	1	1	0	0	0	2	2	3774128	1	3774128	3456	329	90.4	22	8	7	7	86	1	99.65	99.99	0.03	100	0	0
JCM 2434	Aggregatibacter actinomycetemcomitans	Non-type	Bacteria; Pseudomonadati; Pseudomonadota; Gammaproteobacteria; Pasteurellales; Pasteurellaceae	Aerobic	AP043701	Not reported	59.06	N.A.	N.A.	Flye	2158409	44.38	Complete	1	1	1	0	0	0	2	2	2158409	1	2158409	2074	301.9	87	17	6	6	5	57	1	98.04	100	0.05	99.89	0	0
JCM 12291	Marinobacter alkaliphilus	Type	Bacteria; Pseudomonadati; Pseudomonadota; Gammaproteobacteria; Pseudomonadales; Marinobacteraceae	Aerobic	AP043751	Not reported	24.5096	N.A.	N.A.	Flye	4115459	57.37	Complete	1	1	1	0	0	0	0	1	4115459	1	4115459	3740	334	91.1	9	3	3	3	51	1	100	99.95	0	100	0	0
JCM 21475	Azotobacter vinelandii	Type	Bacteria; Pseudomonadati; Pseudomonadota; Gammaproteobacteria; Pseudomonadales; Pseudomonadaceae	Aerobic	AP043912	BSFG01000000	94.8492	N.A.	N.A.	Flye	5379020	65.65	Complete	1	1	1	0	0	1	1	1	5379020	1	5379020	4825	321.3	86.5	18	6	6	6	66	1	100	100	1.19	99.59	1.01	25
JCM 20301	Pseudomonas aeruginosa	Non-type	Bacteria; Pseudomonadati; Pseudomonadota; Gammaproteobacteria; Pseudomonadales; Pseudomonadaceae	Aerobic	BAAIHD000000000	Not reported	N.A.	N.A.	134.658	Unicycler	6327053	66.48	Draft	79	0	0	0	5	1	2	2	260171	9	500348	5726	327.2	88.8	2	0	1	1	54	79	100	100	0.04	99.68	0.11	0
JCM 6156	Pseudomonas putida	Non-type	Bacteria; Pseudomonadati; Pseudomonadota; Gammaproteobacteria; Pseudomonadales; Pseudomonadaceae	Aerobic	AP043703, AP043704	Not reported	20.0565	N.A.	N.A.	Flye	6300533	61.47	Complete	2	2	1	1	1	1	4	4	6183974	1	6183974	5712	325.7	88.6	22	8	7	7	78	2	99.05	100	0.47	100	0.22	0
JCM 15514	Salinisphaera hydrothermalis	Type	Bacteria; Pseudomonadati; Pseudomonadota; Gammaproteobacteria; Salinisphaerales; Salinisphaeraceae	Aerobic	AP043791	APNE01000000	80.2317	N.A.	N.A.	Flye	4203631	63.56	Complete	1	1	1	0	0	0	2	1	4203631	1	4203631	3741	328.3	87.7	6	2	2	2	54	1	99.93	99.79	0.2	98.37	3.5	0
JCM 17795	Galenea microaerophila	Type	Bacteria; Pseudomonadati; Pseudomonadota; Gammaproteobacteria; Thiotrichales; Piscirickettsiaceae	Microaerophilic	BAAHWZ000000000	Not reported	N.A.	70.3807	736.183	Hybracter	1736514	44.95	Draft	4	1	0	1	1	0	0	0	1071701	1	1071701	1642	323	91.6	12	4	4	4	48	4	100	100	0.03	100	0.1	0
JCM 12397	Hydrogenovibrio thermophilus	Type	Bacteria; Pseudomonadati; Pseudomonadota; Gammaproteobacteria; Thiotrichales; Piscirickettsiaceae	Aerobic	AP042392	Not reported	55.1152	N.A.	N.A.	Flye	2567456	50.65	Complete	1	1	1	0	0	0	0	0	2567456	1	2567456	2328	331.7	90.2	9	3	3	3	44	1	97.72	99.97	0.5	98.92	0	0
JCM 30760	Thiomicrorhabdus hydrogeniphila	Type	Bacteria; Pseudomonadati; Pseudomonadota; Gammaproteobacteria; Thiotrichales; Piscirickettsiaceae	Microaerophilic	BAAHXL000000000	Not reported	N.A.	201.072	2557.86	Hybracter	3033949	37.57	Draft	2	1	0	1	1	0	0	0	2936101	1	2936101	2708	321.2	86	9	3	3	3	48	2	99.45	100	0.59	100	0	0
JCM 18905	Vibrio sp.	Non-type	Bacteria; Pseudomonadati; Pseudomonadota; Gammaproteobacteria; Vibrionales; Vibrionaceae	Aerobic	AP043878, AP043879, AP043880	BAYS00000000	28.5301	N.A.	N.A.	Flye	5258283	44.79	Complete	3	1	1	0	0	1	2	2	1824076	2	1864694	4659	322.5	85.7	37	13	12	12	130	3	99.69	100	0	100	0.4	0
JCM 10831	Hydrogenophilus hirschii	Type	Bacteria; Pseudomonadati; Pseudomonadota; Hydrogenophilia; Hydrogenophilales; Hydrogenophilaceae	Microaerophilic	BAAHXQ000000000	Not reported	42.6356	N.A.	N.A.	Hybracter	2204160	61.84	Draft	3	0	0	0	0	0	0	0	1445226	1	1445226	2061	337	94.5	12	4	4	4	53	3	98.68	99.97	0	95.9	0.2	0
JCM 16106	Hydrogenophilus islandicus	Type	Bacteria; Pseudomonadati; Pseudomonadota; Hydrogenophilia; Hydrogenophilales; Hydrogenophilaceae	Aerobic	BAAHXE000000000	Not reported	N.A.	N.A.	997.626	Unicycler	2172249	63.83	Draft	78	1	0	1	3	1	1	2	52055	12	190128	2015	333.4	92.8	2	1	1	0	42	78	99.26	99.94	0.01	95.51	0.2	0
JCM 9785	Rhodothermus marinus	Non-type	Bacteria; Pseudomonadati; Rhodothermota; Rhodothermia; Rhodothermales; Rhodothermaceae	Aerobic	AP043712	Not reported	305.743	N.A.	N.A.	Flye	3410344	64.26	Complete	1	1	1	0	0	0	0	0	3410344	1	3410344	2923	360	92.6	3	1	1	1	45	1	100	99.95	0	100	0	0
JCM 31343	Longimonas haloalkaliphila	Type	Bacteria; Pseudomonadati; Rhodothermota; Rhodothermia; Rhodothermales; Salinibacteraceae	Aerobic	AP043948, AP043949	Not reported	113.906	N.A.	N.A.	Flye	3887148	58.71	Complete	2	2	1	1	0	0	0	1	3803860	1	3803860	3180	345.7	84.8	3	1	1	1	45	2	96.96	93.01	0.52	99.42	0.29	0
JCM 31342	Natronotalea proteinilytica	Type	Bacteria; Pseudomonadati; Rhodothermota; Rhodothermia; Rhodothermales; Salisaetaceae	Aerobic	AP043946, AP043947	Not reported	55.0025	N.A.	N.A.	Flye	3839310	57.15	Complete	2	2	1	1	1	0	0	1	3744354	1	3744354	3208	338.1	84.8	3	1	1	1	43	2	96.39	99.17	0.23	99.42	0.58	0
JCM 14728	Exilispira thermophila	Type	Bacteria; Pseudomonadati; Spirochaetota; Spirochaetia; Spirochaetales	Anaerobic	AP042476	Not reported	27.8045	N.A.	N.A.	Flye	3076775	23.61	Complete	1	1	1	0	0	0	0	0	3076775	1	3076775	2551	342.7	85.2	9	3	3	3	42	1	96.89	96.45	0.78	95.2	0.4	0
JCM 31475	Pleomorphochaeta caudata	Type	Bacteria; Pseudomonadati; Spirochaetota; Spirochaetia; Spirochaetales; Sphaerochaetaceae	Anaerobic	AP042458	Not reported	66.2581	N.A.	N.A.	Flye	3256340	28.49	Complete	1	1	1	0	0	0	1	1	3256340	1	3256340	2905	340.1	91	10	4	3	3	51	1	97.38	98.63	5.41	98.85	0.77	0
JCM 31871	Pleomorphochaeta naphthae	Type	Bacteria; Pseudomonadati; Spirochaetota; Spirochaetia; Spirochaetales; Sphaerochaetaceae	Anaerobic	AP042457	Not reported	35.4266	N.A.	N.A.	Flye	3458095	29.4	Complete	1	1	1	0	0	0	2	2	3458095	1	3458095	3040	332.9	87.8	13	5	4	4	53	1	96.25	99.95	3.49	100	0	0
JCM 12856	Spirochaeta dissipatitropha	Type	Bacteria; Pseudomonadati; Spirochaetota; Spirochaetia; Spirochaetales; Spirochaetaceae	Anaerobic	BAAHXT000000000	Not reported	N.A.	N.A.	660.296	Unicycler	3881734	47.95	Draft	52	0	0	0	2	0	0	1	323575	5	459762	3335	360.8	93	1	0	0	1	43	52	98.1	98.31	0.58	100	0.47	0
JCM 30394	Deferrisoma palaeochoriense	Type	Bacteria; Pseudomonadati; Thermodesulfobacteriota; Deferrisomatia; Deferrisomatales; Deferrisomataceae	Anaerobic	BAAHXI000000000	Not reported	N.A.	N.A.	524.547	Unicycler	3990834	70.31	Draft	177	0	0	0	2	0	0	2	47048	28	175446	3561	324.8	87	3	2	1	0	48	177	98.85	100	1.62	98.32	2.52	0
JCM 19179	Desulfatiglans parachlorophenolica	Type	Bacteria; Pseudomonadati; Thermodesulfobacteriota; Desulfobacteria; Desulfatiglandales; Desulfatiglandaceae	Anaerobic	AP042460	Not reported	185.63	N.A.	N.A.	Flye	5748599	57.57	Complete	1	1	1	0	0	0	3	5	5748599	1	5748599	4960	327.7	84.8	3	1	1	1	49	1	98.94	100	6.04	99.35	1.03	0
JCM 14469	Desulfatiferula olefinivorans	Type	Bacteria; Pseudomonadati; Thermodesulfobacteriota; Desulfobacteria; Desulfobacterales; Desulfobacteraceae	Anaerobic	BAAHXV000000000	Not reported	N.A.	N.A.	286.093	Unicycler	5231836	56.83	Draft	117	0	0	0	1	0	3	6	119994	13	435125	4190	363.8	87.4	3	1	1	1	46	117	97.21	99.91	0.46	100	0.65	0
JCM 12294	Desulfocicer niacini	Type	Bacteria; Pseudomonadati; Thermodesulfobacteriota; Desulfobacteria; Desulfobacterales; Desulfobacteraceae	Anaerobic	BAAHYK000000000	Not reported	N.A.	N.A.	291.37	Unicycler	6112498	47.34	Draft	177	0	0	0	1	0	0	3	106191	21	217924	4945	345.6	83.9	1	0	1	0	53	177	97.02	99.85	4.85	99.35	1.02	0
JCM 16085	Desulfoconvexum algidum	Type	Bacteria; Pseudomonadati; Thermodesulfobacteriota; Desulfobacteria; Desulfobacterales; Desulfobacteraceae	Anaerobic	AP042394	Not reported	157.261	N.A.	N.A.	Flye	6914574	44.74	Complete	1	1	1	0	0	0	0	1	6914574	1	6914574	6171	325.2	87.1	15	5	5	5	47	1	98.1	100	6.09	99.35	5.16	21.43
JCM 12296	Desulfosarcina cetonica	Type	Bacteria; Pseudomonadati; Thermodesulfobacteriota; Desulfobacteria; Desulfobacterales; Desulfosarcinaceae	Anaerobic	BAAIFB000000000	BBCC00000000	0.120695	N.A.	183.666	Unicycler	7099167	55.81	Draft	210	0	0	0	6	0	2	13	89892	23	452777	5911	344.9	86.2	3	1	1	1	53	210	99.81	100	4.82	99.35	2.15	0
JCM 39068	Desulfocastanea catecholica	Type	Bacteria; Pseudomonadati; Thermodesulfobacteriota; Desulfobulbia; Desulfobulbales; Desulfobulbaceae	Anaerobic	BAAHYZ000000000	Not reported	N.A.	N.A.	310.798	Unicycler	5015434	50.8	Draft	132	0	0	0	5	0	1	5	176501	10	390956	4497	320.9	86.3	2	1	0	1	51	132	97.76	100	2.67	99.4	1.81	0
JCM 19994	Desulfogranum aggregans	Type	Bacteria; Pseudomonadati; Thermodesulfobacteriota; Desulfobulbia; Desulfobulbales; Desulfobulbaceae	Anaerobic	AP042447	Not reported	N.A.	175.453	N.A.	Flye	4815315	51.88	Complete	1	1	1	0	0	0	0	1	4815315	1	4815315	4198	335	87.6	12	4	4	4	50	1	96.83	100	0.8	99.02	0.83	0
JCM 14714	Desulfomicrobium aestuarii	Type	Bacteria; Pseudomonadati; Thermodesulfobacteriota; Desulfovibrionia; Desulfovibrionales; Desulfomicrobiaceae	Anaerobic	AP042427	Not reported	75.5048	N.A.	N.A.	Flye	3916872	63.23	Complete	1	1	1	0	0	0	1	3	3916872	1	3916872	3459	338.1	89.6	13	5	4	4	70	1	97.97	100	0.92	100	0	0
JCM 14713	Desulfomicrobium salsuginis	Type	Bacteria; Pseudomonadati; Thermodesulfobacteriota; Desulfovibrionia; Desulfovibrionales; Desulfomicrobiaceae	Anaerobic	BAAHYA000000000	Not reported	50.5419	N.A.	N.A.	Hybracter	4027265	62.84	Draft	2	0	0	0	0	0	1	1	2433517	1	2433517	3491	342.2	89	13	5	4	4	69	2	98.06	100	0.89	99.4	0	0
JCM 31598	Desulfonatronum parangueonense	Type	Bacteria; Pseudomonadati; Thermodesulfobacteriota; Desulfovibrionia; Desulfovibrionales; Desulfonatronaceae	Anaerobic	BAAHXH000000000	Not reported	N.A.	516.511	284.461	Hybracter	5017389	55.72	Draft	6	1	0	1	1	0	1	1	4816044	1	4816044	4332	323.5	83.8	9	3	3	3	56	6	99.47	100	0.9	99.38	0	0
JCM 13028	Desulfonauticus autotrophicus	Type	Bacteria; Pseudomonadati; Thermodesulfobacteriota; Desulfovibrionia; Desulfovibrionales; Desulfonauticaceae	Anaerobic	AP042395	Not reported	N.A.	1061.19	727.062	Flye	2265687	38.79	Complete	1	1	1	0	0	0	1	1	2265687	1	2265687	2577	268.4	91.6	6	2	2	2	50	1	95.25	85.68	3.95	95.63	0.2	0
JCM 12298	Desulfothermus naphthae	Type	Bacteria; Pseudomonadati; Thermodesulfobacteriota; Desulfovibrionia; Desulfovibrionales; Desulfothermaceae	Anaerobic	BAAHYQ000000000	Not reported	N.A.	143.775	487.204	Hybracter	3299280	34.55	Draft	3	0	0	0	0	0	1	1	1957724	1	1957724	3186	301	87.2	6	2	2	2	49	3	97.73	99.95	2.66	98.48	0.26	0
JCM 13304	Desulfothermus okinawensis	Type	Bacteria; Pseudomonadati; Thermodesulfobacteriota; Desulfovibrionia; Desulfovibrionales; Desulfothermaceae	Anaerobic	BAAIEW000000000	BBBM00000000	N.A.	9.06358	1173.84	Unicycler	2775473	36.12	Draft	79	2	0	2	1	0	0	4	80534	13	205095	2492	334.6	90.1	2	1	0	1	49	79	97.59	99.78	0.1	99.11	0.2	0
JCM 16814	Desulfobaculum senezii	Type	Bacteria; Pseudomonadati; Thermodesulfobacteriota; Desulfovibrionia; Desulfovibrionales; Desulfovibrionaceae	Anaerobic	BAAHYU000000000	Not reported	N.A.	313.437	652.729	Hybracter	4096534	61.26	Draft	7	1	0	1	0	0	11	9	1303805	2	1896746	3554	333.4	86.8	13	4	5	4	80	7	98.93	100	0.2	100	0.02	0
JCM 18546	Desulfocurvus thunnarius	Type	Bacteria; Pseudomonadati; Thermodesulfobacteriota; Desulfovibrionia; Desulfovibrionales; Desulfovibrionaceae	Anaerobic	AP042411	Not reported	13.2322	N.A.	N.A.	Flye	3614815	69.36	Complete	1	1	1	0	0	0	1	1	3614815	1	3614815	3142	339.4	88.5	6	2	2	2	56	1	97.62	99.71	0.09	100	0	0
JCM 30146	Desulfovibrio biadhensis	Type	Bacteria; Pseudomonadati; Thermodesulfobacteriota; Desulfovibrionia; Desulfovibrionales; Desulfovibrionaceae	Anaerobic	AP042477	Not reported	13.1524	N.A.	N.A.	Flye	5182856	54.39	Complete	1	1	1	0	0	0	4	2	5182856	1	5182856	4516	337.4	88.2	6	2	2	2	51	1	97.5	99.99	1.15	99.41	1.25	0
JCM 12178	Desulfovibrio brasiliensis	Type	Bacteria; Pseudomonadati; Thermodesulfobacteriota; Desulfovibrionia; Desulfovibrionales; Desulfovibrionaceae	Anaerobic	BAAIGH000000000	BBCB00000000	2.17816	N.A.	602.909	Unicycler	3545326	59.62	Draft	17	0	0	0	1	0	1	2	519721	3	981065	3268	324.3	89.7	6	2	2	2	56	17	93.69	99.96	0.26	96.45	0	0
JCM 16812	Desulfovibrio simplex	Type	Bacteria; Pseudomonadati; Thermodesulfobacteriota; Desulfovibrionia; Desulfovibrionales; Desulfovibrionaceae	Anaerobic	AP042377	Not reported	45.5085	N.A.	N.A.	Flye	3802826	57.38	Complete	1	1	1	0	0	0	1	1	3802826	1	3802826	3032	344.3	82.3	9	3	3	3	56	1	99.47	100	0.46	99.41	0	0
JCM 15519	Fundidesulfovibrio butyratiphilus	Type	Bacteria; Pseudomonadati; Thermodesulfobacteriota; Desulfovibrionia; Desulfovibrionales; Desulfovibrionaceae	Anaerobic	BAAHXA000000000	Not reported	29.8442	46.6161	256.667	Hybracter	4293546	63.21	Draft	4	0	0	0	0	0	12	12	2407068	1	2407068	3791	328.5	87	6	2	2	2	52	4	100	99.88	0.37	100	0	0
JCM 15971	Halodesulfovibrio oceani subsp. galateae	Type	Bacteria; Pseudomonadati; Thermodesulfobacteriota; Desulfovibrionia; Desulfovibrionales; Desulfovibrionaceae	Anaerobic	AP042453	Not reported	11.5419	N.A.	N.A.	Flye	4110717	45.23	Complete	1	1	1	0	0	0	6	6	4110717	1	4110717	3463	329.5	83.3	22	8	7	7	113	1	97.17	97.73	1.17	99.41	0.66	0
JCM 15970	Halodesulfovibrio oceani subsp. oceani	Type	Bacteria; Pseudomonadati; Thermodesulfobacteriota; Desulfovibrionia; Desulfovibrionales; Desulfovibrionaceae	Anaerobic	AP042452	Not reported	59.4957	N.A.	N.A.	Flye	4103490	44.66	Complete	1	1	1	0	0	0	3	3	4103490	1	4103490	3427	333	83.4	22	8	7	7	117	1	97.35	99.56	0.48	99.41	1.18	0
JCM 14124	Humidesulfovibrio idahonensis	Type	Bacteria; Pseudomonadati; Thermodesulfobacteriota; Desulfovibrionia; Desulfovibrionales; Desulfovibrionaceae	Anaerobic	BAAHYE000000000	Not reported	20.8489	N.A.	N.A.	Hybracter	3497923	65.46	Draft	3	0	0	0	0	0	3	3	2083714	1	2083714	3044	341.2	89.1	6	2	2	2	56	3	98.96	99.99	0.01	99.41	0	0
JCM 31065	Maridesulfovibrio salinus	Type	Bacteria; Pseudomonadati; Thermodesulfobacteriota; Desulfovibrionia; Desulfovibrionales; Desulfovibrionaceae	Anaerobic	AP042461	Not reported	119.095	N.A.	N.A.	Flye	4400874	47.44	Complete	1	1	1	0	0	0	5	7	4400874	1	4400874	3911	326.5	87	15	5	5	5	94	1	99.51	99.99	0.48	100	0	0
JCM 14635	Megalodesulfovibrio paquesii	Type	Bacteria; Pseudomonadati; Thermodesulfobacteriota; Desulfovibrionia; Desulfovibrionales; Desulfovibrionaceae	Anaerobic	BAAIGQ000000000	Not reported	64.1246	N.A.	N.A.	Hybracter	4514617	63.18	Draft	10	2	0	2	0	0	17	14	796717	3	1363139	4071	332.3	89.9	9	3	3	3	58	10	98.94	99.93	0.44	100	0.59	100
JCM 14040	Oceanidesulfovibrio marinus	Type	Bacteria; Pseudomonadati; Thermodesulfobacteriota; Desulfovibrionia; Desulfovibrionales; Desulfovibrionaceae	Anaerobic	AP042448	Not reported	43.5227	N.A.	N.A.	Revio	4938361	62.38	Complete	1	1	1	0	0	0	3	3	4938361	1	4938361	4330	333.6	87.8	6	2	2	2	50	1	98.86	99.97	2.36	99.31	0.89	0
JCM 15785	Oleidesulfovibrio vietnamensis	Type	Bacteria; Pseudomonadati; Thermodesulfobacteriota; Desulfovibrionia; Desulfovibrionales; Desulfovibrionaceae	Anaerobic	AP042419	Not reported	N.A.	488.44	383.414	Flye	3633309	57.85	Complete	1	1	1	0	0	0	8	4	3633309	1	3633309	3251	329	88.3	12	4	4	4	69	1	99.29	100	0.33	100	1.78	50
JCM 30471	Desulfuromonas carbonis	Type	Bacteria; Pseudomonadati; Thermodesulfobacteriota; Desulfuromonadia; Desulfuromonadales; Desulfuromonadaceae	Anaerobic	BAAHXR000000000	Not reported	N.A.	344.788	383.633	Hybracter	3953300	62.4	Draft	5	0	0	0	0	0	0	0	2257745	1	2257745	3607	326.5	89.4	6	2	2	2	53	5	100	100	4.04	99.35	7.74	88.89
JCM 12927	Desulfuromonas svalbardensis	Type	Bacteria; Pseudomonadati; Thermodesulfobacteriota; Desulfuromonadia; Desulfuromonadales; Desulfuromonadaceae	Anaerobic	AP042416	Not reported	N.A.	126.598	709.028	Hybracter	3257116	45.58	Draft	1	0	0	0	0	0	0	0	3257116	1	3257116	2851	336.3	88.3	11	5	3	3	50	1	100	100	0.74	98.71	0.65	0
JCM 12926	Desulfuromusa ferrireducens	Type	Bacteria; Pseudomonadati; Thermodesulfobacteriota; Desulfuromonadia; Desulfuromonadales; Desulfuromonadaceae	Anaerobic	AP042415	Not reported	323.648	N.A.	N.A.	Flye	4446708	51.59	Complete	1	1	1	0	0	0	0	0	4446708	1	4446708	3975	327.5	87.8	6	2	2	2	54	1	98.62	100	0.75	99.35	0.65	0
JCM 15764	Geotalea toluenoxydans	Type	Bacteria; Pseudomonadati; Thermodesulfobacteriota; Desulfuromonadia; Geobacterales; Geobacteraceae	Anaerobic	BAAIGI000000000	BBCJ00000000	2.00358	N.A.	927.115	Unicycler	4210383	53.62	Draft	16	0	0	0	0	0	0	0	700365	2	1442807	3753	337.4	90.2	3	1	1	1	49	16	100	100	0.37	99.35	0	0
JCM 16410	Desulfosoma profundi	Type	Bacteria; Pseudomonadati; Thermodesulfobacteriota; Syntrophobacteria; Syntrophobacterales; Syntrophobacteraceae	Anaerobic	AP042420	Not reported	N.A.	786.554	336.586	Flye	3797180	57.52	Complete	1	1	1	0	0	0	1	1	3797180	1	3797180	3375	327.8	87.4	6	2	2	2	47	1	99.58	100	3.26	98.71	0.81	0
JCM 14805	Prosthecobacter fluviatilis	Type	Bacteria; Pseudomonadati; Verrucomicrobiota; Verrucomicrobiia; Verrucomicrobiales; Verrucomicrobiaceae	Aerobic	AP043782	JBHSMQ010000000	87.7277	N.A.	N.A.	Flye	6449430	61.3	Complete	1	1	1	0	0	0	1	1	6449430	1	6449430	5022	391.4	91.4	6	2	2	2	61	1	94.02	95.02	0.93	99.32	0	0
JCM 15963	Rhabdothermus arcticus	Type	Bacteria; Thermotogati; Deinococcota; Deinococci; Thermales; Thermaceae	Aerobic	AP043808, AP043809	Not reported	132.79	N.A.	N.A.	Flye	1975852	68.74	Complete	2	2	1	1	1	0	0	0	1909391	1	1909391	2007	312.3	95.2	6	2	2	2	48	2	99.39	99.75	0	94.47	1.7	0
JCM 11602	Thermus brockianus	Type	Bacteria; Thermotogati; Deinococcota; Deinococci; Thermales; Thermaceae	Aerobic	BAAIFJ000000000	Not reported	49.139	N.A.	N.A.	Hybracter	2472090	66.86	Draft	4	2	0	2	1	2	3	4	2044042	1	2044042	2605	296.7	93.8	6	2	2	2	52	4	100	99.99	0.06	100	0	0
JCM 12314	Thermus kawarayensis	Type	Bacteria; Thermotogati; Deinococcota; Deinococci; Thermales; Thermaceae	Aerobic	AP043753, AP043754, AP043755, AP043756, AP043757, AP043758	BBBL00000000	N.A.	586.579	N.A.	Flye	2471223	68.49	Complete	6	3	1	2	2	1	0	0	2075430	1	2075430	2583	298.3	93.5	6	2	2	2	48	6	99.41	99.29	0.4	99.15	0	0
JCM 11956	Vulcanithermus mediatlanticus	Type	Bacteria; Thermotogati; Deinococcota; Deinococci; Thermales; Thermaceae	Anaerobic	AP042385, AP042384	Not reported	28.2911	N.A.	N.A.	Flye	2252517	65.1	Complete	2	2	1	1	0	0	1	0	2072567	1	2072567	2273	308.1	93.3	6	2	2	2	49	2	98.55	99.94	0.04	99.57	1.7	0
JCM 19320	Aminobacterium thunnarium	Type	Bacteria; Thermotogati; Synergistota; Synergistia; Synergistales; Aminobacteriaceae	Anaerobic	AP042412	Not reported	95.4161	N.A.	N.A.	Flye	2355962	41.71	Complete	1	1	1	0	0	0	1	1	2355962	1	2355962	2233	325.4	92.5	9	3	3	3	49	1	98.9	99.88	1.34	100	0	0
JCM 17151	Lactivibrio alcoholicus	Type	Bacteria; Thermotogati; Synergistota; Synergistia; Synergistales; Aminobacteriaceae	Anaerobic	AP042471	Not reported	24.2658	N.A.	N.A.	Flye	3538732	60.72	Complete	1	1	1	0	0	0	1	2	3538732	1	3538732	3222	333.2	91	9	3	3	3	49	1	96.47	99.92	1.32	100	2.31	0
JCM 18154	Mesotoga infera	Type	Bacteria; Thermotogati; Thermotogota; Thermotogae; Kosmotogales; Kosmotogaceae	Anaerobic	AP042414, AP042413	Not reported	21.0095	N.A.	N.A.	Flye	2968814	48.33	Complete	2	2	1	1	0	0	1	1	2959436	1	2959436	2698	330.4	90.1	6	2	2	2	47	2	99.12	99.96	1.04	99.84	0.47	0
JCM 17210	Defluviitoga tunisiensis	Type	Bacteria; Thermotogati; Thermotogota; Thermotogae; Petrotogales; Petrotogaceae	Anaerobic	AP042410	Not reported	19.1366	N.A.	N.A.	Flye	2194816	31.26	Complete	1	1	1	0	0	0	0	0	2194816	1	2194816	1924	335.6	88.2	6	0	3	3	49	1	99.58	99.6	0.01	96.55	0	0
JCM 30566	Marinitoga arctica	Type	Bacteria; Thermotogati; Thermotogota; Thermotogae; Petrotogales; Petrotogaceae	Anaerobic	BAAHYY000000000	Not reported	N.A.	N.A.	693.819	Unicycler	2120670	26.7	Draft	77	0	0	0	1	0	0	0	52872	13	120690	1977	327.7	91.7	1	0	1	0	38	77	97.8	99.98	0	96.55	2.07	0
JCM 13303	Marinitoga okinawensis	Type	Bacteria; Thermotogati; Thermotogota; Thermotogae; Petrotogales; Petrotogaceae	Anaerobic	AP042422, AP042423	Not reported	N.A.	53.3235	1041.24	Flye	2298711	26.98	Complete	2	2	1	1	0	0	0	0	2270465	1	2270465	2153	328	92.2	6	0	3	3	52	2	98.34	98.54	0.12	98.28	3.79	0
