# Supplementary material
Source: HighWire-hosted journal article supplement (doi:10.1101/gr.281026.125)
Supplement: Supplemental_Table_S3.xlsx [file Supplemental_Table_S3.xlsx]

## Sheet: TableS3
Supplemental Table S3. Taxonomic classification of the 351 strains.
JCM number	Scientific name (ICNP-based)	valid/invalid name	Type/non-type	Taxonomy (ICNP-based) at family or higher level	Taxonomy (GTDB-based)	closest_genome_reference (GTDB)	closest_genome_ani (GTDB)	TYGS result	Newly released genomes	Genomic and taxonomic novelty
JCM 15760	Haloarcula argentinensis	Valid	Non-type	Archaea; Methanobacteriati; Halobacteriota; Halobacteria; Halobacteriales; Haloarculaceae	d__Archaea;p__Halobacteriota;c__Halobacteria;o__Halobacteriales;f__Haloarculaceae;g__Haloarcula;s__Haloarcula argentinensis	GCF_000336895.1	95	Potential new species	NO	Same species
JCM 17269	Halovenus rubra	Valid	Type	Archaea; Methanobacteriati; Halobacteriota; Halobacteria; Halobacteriales; Haloarculaceae	d__Archaea;p__Halobacteriota;c__Halobacteria;o__Halobacteriales;f__Haloarculaceae;g__Halovenus;s__Halovenus rubra	GCF_026586665.1	95	Potential new species	NO	Same species
JCM 19908	Halobacterium rubrum	Valid	Type	Archaea; Methanobacteriati; Halobacteriota; Halobacteria; Halobacteriales; Halobacteriaceae	d__Archaea;p__Halobacteriota;c__Halobacteria;o__Halobacteriales;f__Halobacteriaceae;g__Halobacterium;s__Halobacterium rubrum	GCF_029872365.1	95	Potential new species	YES	Same species
JCM 11890	Halalkalicoccus tibetensis	Valid	Type	Archaea; Methanobacteriati; Halobacteriota; Halobacteria; Halobacteriales; Halococcaceae	d__Archaea;p__Halobacteriota;c__Halobacteria;o__Halobacteriales;f__Halalkalicoccaceae;g__Halalkalicoccus;s__Halalkalicoccus tibetensis	GCF_037996645.1	95	Potential new species	NO	Same species
JCM 30029	Halobium salinum	Valid	Type	Archaea; Methanobacteriati; Halobacteriota; Halobacteria; Halobacteriales; Haloferacaceae	d__Archaea;p__Halobacteriota;c__Halobacteria;o__Halobacteriales;f__Haloferacaceae;g__Halobium;s__Halobium salinum	GCF_026586625.1	95	Potential new species	NO	Same species
JCM 30237	Halolamina litorea	Valid	Type	Archaea; Methanobacteriati; Halobacteriota; Halobacteria; Halobacteriales; Haloferacaceae	d__Archaea;p__Halobacteriota;c__Halobacteria;o__Halobacteriales;f__Haloferacaceae;g__Halolamina;s__Halolamina litorea	GCF_026616205.1	95	Potential new species	NO	Same species
JCM 18549	Halolamina salina	Valid	Type	Archaea; Methanobacteriati; Halobacteriota; Halobacteria; Halobacteriales; Haloferacaceae	d__Archaea;p__Halobacteriota;c__Halobacteria;o__Halobacteriales;f__Haloferacaceae;g__Halolamina;s__	N/A	N/A	Potential new species	YES	First genome at species level
JCM 30442	Haloparvum alkalitolerans	Valid	Type	Archaea; Methanobacteriati; Halobacteriota; Halobacteria; Halobacteriales; Haloferacaceae	d__Archaea;p__Halobacteriota;c__Halobacteria;o__Halobacteriales;f__Haloferacaceae;g__Haloparvum;s__	N/A	N/A	Potential new species	NO	Same species
JCM 17506	Halopelagius fulvigenes	Valid	Type	Archaea; Methanobacteriati; Halobacteriota; Halobacteria; Halobacteriales; Haloferacaceae	d__Archaea;p__Halobacteriota;c__Halobacteria;o__Halobacteriales;f__Haloferacaceae;g__Halopelagius;s__	N/A	N/A	Potential new species	NO	First genome at species level
JCM 18641	Halopenitus salinus	Valid	Type	Archaea; Methanobacteriati; Halobacteriota; Halobacteria; Halobacteriales; Haloferacaceae	d__Archaea;p__Halobacteriota;c__Halobacteria;o__Halobacteriales;f__Haloferacaceae;g__Halopenitus;s__	N/A	N/A	Potential new species	YES	First genome at species level
JCM 17092	Haloplanus litoreus	Valid	Type	Archaea; Methanobacteriati; Halobacteriota; Halobacteria; Halobacteriales; Haloferacaceae	d__Archaea;p__Halobacteriota;c__Halobacteria;o__Halobacteriales;f__Haloferacaceae;g__Haloplanus;s__	N/A	N/A	Potential new species	YES	First genome at species level
JCM 14265	Halorubrum ejinorense	Valid	Type	Archaea; Methanobacteriati; Halobacteriota; Halobacteria; Halobacteriales; Haloferacaceae	d__Archaea;p__Halobacteriota;c__Halobacteria;o__Halobacteriales;f__Haloferacaceae;g__Halorubrum;s__Halorubrum ejinorense	GCF_039522565.1	95	Potential new species	NO	Same species
JCM 17823	Halorubrum gandharaense	Valid	Type	Archaea; Methanobacteriati; Halobacteriota; Halobacteria; Halobacteriales; Haloferacaceae	d__Archaea;p__Halobacteriota;c__Halobacteria;o__Halobacteriales;f__Haloferacaceae;g__Halorubrum;s__	N/A	N/A	Potential new species	YES	First genome at species level
JCM 18237	Halorubrum luteum	Valid	Type	Archaea; Methanobacteriati; Halobacteriota; Halobacteria; Halobacteriales; Haloferacaceae	d__Archaea;p__Halobacteriota;c__Halobacteria;o__Halobacteriales;f__Haloferacaceae;g__Halorubrum;s__	N/A	N/A	Potential new species	YES	First genome at species level
JCM 30955	Halorubrum pallidum	Valid	Type	Archaea; Methanobacteriati; Halobacteriota; Halobacteria; Halobacteriales; Haloferacaceae	d__Archaea;p__Halobacteriota;c__Halobacteria;o__Halobacteriales;f__Haloferacaceae;g__Halorubrum;s__	N/A	N/A	Potential new species	NO	Same species
JCM 11889	Halorubrum tibetense	Valid	Type	Archaea; Methanobacteriati; Halobacteriota; Halobacteria; Halobacteriales; Haloferacaceae	d__Archaea;p__Halobacteriota;c__Halobacteria;o__Halobacteriales;f__Haloferacaceae;g__Halorubrum;s__	N/A	N/A	Potential new species	YES	First genome at species level
JCM 31271	Halorubrum trueperi	Valid	Type	Archaea; Methanobacteriati; Halobacteriota; Halobacteria; Halobacteriales; Haloferacaceae	d__Archaea;p__Halobacteriota;c__Halobacteria;o__Halobacteriales;f__Haloferacaceae;g__Halorubrum;s__	N/A	N/A	Potential new species	YES	First genome at species level
JCM 30665	Halorubrum yunnanense	Valid	Type	Archaea; Methanobacteriati; Halobacteriota; Halobacteria; Halobacteriales; Haloferacaceae	d__Archaea;p__Halobacteriota;c__Halobacteria;o__Halobacteriales;f__Haloferacaceae;g__Halorubrum;s__Halorubrum yunnanense	GCF_026586675.1	95	Potential new species	NO	Same species
JCM 18642	Haloarchaeobius amylolyticus	Valid	Type	Archaea; Methanobacteriati; Halobacteriota; Halobacteria; Halobacteriales; Halorubellaceae	d__Archaea;p__Halobacteriota;c__Halobacteria;o__Halobacteriales;f__Natrialbaceae;g__Haloarchaeobius;s__Haloarchaeobius amylolyticus	GCF_026616195.1	95	Potential new species	NO	Same species
JCM 17117	Halorubellus litoreus	Valid	Type	Archaea; Methanobacteriati; Halobacteriota; Halobacteria; Halobacteriales; Halorubellaceae	d__Archaea;p__Halobacteriota;c__Halobacteria;o__Halobacteriales;f__Natrialbaceae;g__Halorubellus;s__Halorubellus litoreus	GCF_037081675.1	95	Potential new species	NO	Same species
JCM 19583	Halopiger thermotolerans	Valid	Type	Archaea; Methanobacteriati; Halobacteriota; Halobacteria; Halobacteriales; Natrialbaceae	d__Archaea;p__Halobacteriota;c__Halobacteria;o__Halobacteriales;f__Natrialbaceae;g__Halopiger;s__	N/A	N/A	Potential new species	NO	Same species
JCM 16592	Halostagnicola alkaliphila	Valid	Type	Archaea; Methanobacteriati; Halobacteriota; Halobacteria; Halobacteriales; Natrialbaceae	d__Archaea;p__Halobacteriota;c__Halobacteria;o__Halobacteriales;f__Natrialbaceae;g__Halostagnicola;s__	N/A	N/A	Potential new species	YES	First genome at species level
JCM 18750	Halostagnicola bangensis	Valid	Type	Archaea; Methanobacteriati; Halobacteriota; Halobacteria; Halobacteriales; Natrialbaceae	d__Archaea;p__Halobacteriota;c__Halobacteria;o__Halobacteriales;f__Natrialbaceae;g__Halostagnicola;s__Halostagnicola sp030068615	GCF_030068615.1	95	Potential new species	YES	First genome of named species
JCM 9743	Natrinema sp.	N.A.	Non-type	Archaea; Methanobacteriati; Halobacteriota; Halobacteria; Halobacteriales; Natrialbaceae	d__Archaea;p__Halobacteriota;c__Halobacteria;o__Halobacteriales;f__Natrialbaceae;g__Natrinema;s__Natrinema pallidum	GCF_000337615.1	95	Potential new species	YES	Known species
JCM 31939	Natronobiforma cellulositropha	Valid	Type	Archaea; Methanobacteriati; Halobacteriota; Halobacteria; Halobacteriales; Natrialbaceae	d__Archaea;p__Halobacteriota;c__Halobacteria;o__Halobacteriales;f__Natrialbaceae;g__Natronobiforma;s__Natronobiforma cellulositropha	GCF_025629245.1	95	Potential new species	NO	Same species
JCM 16328	Natronoarchaeum mannanilyticum	Valid	Type	Archaea; Methanobacteriati; Halobacteriota; Halobacteria; Halobacteriales; Natronoarchaeaceae	d__Archaea;p__Halobacteriota;c__Halobacteria;o__Halobacteriales;f__Natronoarchaeaceae;g__Natronoarchaeum;s__Natronoarchaeum mannanilyticum	GCF_039522665.1	95	Potential new species	NO	Same species
JCM 19597	Salinarchaeum chitinilyticum	Valid	Type	Archaea; Methanobacteriati; Halobacteriota; Halobacteria; Halobacteriales; Natronoarchaeaceae	d__Archaea;p__Halobacteriota;c__Halobacteria;o__Halobacteriales;f__Salinarchaeaceae;g__Salinarchaeum;s__	N/A	N/A	Potential new species	NO	Same species
JCM 15416	Methanobacterium flexile	Valid	Type	Archaea; Methanobacteriati; Methanobacteriota; Methanobacteria; Methanobacteriales; Methanobacteriaceae	d__Archaea;p__Methanobacteriota;c__Methanobacteria;o__Methanobacteriales;f__Methanobacteriaceae;g__UBA349;s__	N/A	N/A	Potential new species	YES	Potentially different genus
JCM 15797	Methanobacterium kanagiense	Valid	Type	Archaea; Methanobacteriati; Methanobacteriota; Methanobacteria; Methanobacteriales; Methanobacteriaceae	d__Archaea;p__Methanobacteriota;c__Methanobacteria;o__Methanobacteriales;f__Methanobacteriaceae;g__Methanobacterium;s__	N/A	N/A	Potential new species	YES	First genome at species level
JCM 15415	Methanobacterium movens	Valid	Type	Archaea; Methanobacteriati; Methanobacteriota; Methanobacteria; Methanobacteriales; Methanobacteriaceae	d__Archaea;p__Methanobacteriota;c__Methanobacteria;o__Methanobacteriales;f__Methanobacteriaceae;g__Methanobacterium_F;s__Methanobacterium_F alkalithermotolerans	GCF_018141185.1	95	Potential new species	YES	Potentially different species
JCM 18470	Methanobacterium movilense	Valid	Type	Archaea; Methanobacteriati; Methanobacteriota; Methanobacteria; Methanobacteriales; Methanobacteriaceae	d__Archaea;p__Methanobacteriota;c__Methanobacteria;o__Methanobacteriales;f__Methanobacteriaceae;g__Methanobacterium_D;s__	N/A	N/A	Potential new species	YES	First genome at species level
JCM 10723	Methanothermus sociabilis	Valid	Type	Archaea; Methanobacteriati; Methanobacteriota; Methanobacteria; Methanobacteriales; Methanothermaceae	d__Archaea;p__Methanobacteriota;c__Methanobacteria;o__Methanobacteriales;f__Methanothermaceae;g__Methanothermus;s__Methanothermus fervidus	GCA_000166095.1	95	Potential new species	YES	Potentially different species
JCM 17393	Methanothermobacter crinale	Valid	Type	Archaea; Methanobacteriati; Methanobacteriota; Methanobacteria; Methanobacteriales; Methanothermobacteraceae	d__Archaea;p__Methanobacteriota;c__Methanobacteria;o__Methanobacteriales;f__DSM-23052;g__Methanothermobacter_A;s__Methanothermobacter_A sp001507955	GCA_001507955.1	95	Potential new species	YES	First genome of named species
JCM 11886	Methanocaldococcus indicus	Valid	Type	Archaea; Methanobacteriati; Methanobacteriota; Methanococci; Methanococcales; Methanocaldococcaceae	d__Archaea;p__Methanobacteriota;c__Methanococci;o__Methanococcales;f__Methanocaldococcaceae;g__Methanocaldococcus;s__	N/A	N/A	Potential new species	YES	First genome at species level
JCM 10627	Methanocalculus pumilus	Valid	Type	Archaea; Methanobacteriati; Methanobacteriota; Methanomicrobia; Methanomicrobiales; Methanocalculaceae	d__Archaea;p__Halobacteriota;c__Methanomicrobia;o__Methanomicrobiales;f__Methanocorpusculaceae;g__Methanocalculus;s__	N/A	N/A	Potential new species	YES	First genome at species level
JCM 10550	Methanogenium cariaci	Valid	Type	Archaea; Methanobacteriati; Methanobacteriota; Methanomicrobia; Methanomicrobiales; Methanomicrobiaceae	d__Archaea;p__Halobacteriota;c__Methanomicrobia;o__Methanomicrobiales;f__Methanomicrobiaceae;g__Methanogenium;s__Methanogenium cariaci	GCF_001315945.1	95	Potential new species	NO	Same species
JCM 11281	Methanosarcina baltica	Valid	Type	Archaea; Methanobacteriati; Methanobacteriota; Methanomicrobia; Methanosarcinales; Methanosarcinaceae	d__Archaea;p__Halobacteriota;c__Methanosarcinia;o__Methanosarcinales;f__Methanosarcinaceae;g__JAQVBP01;s__	N/A	N/A	Potential new species	YES	Potentially different genus
JCM 15540	Methanosarcina subterranea	Valid	Type	Archaea; Methanobacteriati; Methanobacteriota; Methanomicrobia; Methanosarcinales; Methanosarcinaceae	d__Archaea;p__Halobacteriota;c__Methanosarcinia;o__Methanosarcinales;f__Methanosarcinaceae;g__Methanosarcina;s__Methanosarcina sp020804225	GCF_020804225.1	95	Potential new species	YES	First genome of named species
JCM 13384	Palaeococcus helgesonii	Valid	Type	Archaea; Methanobacteriati; Methanobacteriota; Thermococci; Thermococcales; Thermococcaceae	d__Archaea;p__Methanobacteriota_B;c__Thermococci;o__Thermococcales;f__Thermococcaceae;g__Palaeococcus;s__	N/A	N/A	Potential new species	YES	First genome at species level
JCM 8421	Pyrococcus woesei	Valid	Type	Archaea; Methanobacteriati; Methanobacteriota; Thermococci; Thermococcales; Thermococcaceae	d__Archaea;p__Methanobacteriota_B;c__Thermococci;o__Thermococcales;f__Thermococcaceae;g__Pyrococcus;s__Pyrococcus furiosus	GCF_000007305.1	95	Pyrococcus furiosus	YES	Potentially different species
JCM 10828	Thermococcus aegaeus	Valid	Type	Archaea; Methanobacteriati; Methanobacteriota; Thermococci; Thermococcales; Thermococcaceae	d__Archaea;p__Methanobacteriota_B;c__Thermococci;o__Thermococcales;f__Thermococcaceae;g__Thermococcus_A;s__	N/A	N/A	Potential new species	YES	First genome at species level
JCM 16138	Thermococcus atlanticus	Valid	Type	Archaea; Methanobacteriati; Methanobacteriota; Thermococci; Thermococcales; Thermococcaceae	d__Archaea;p__Methanobacteriota_B;c__Thermococci;o__Thermococcales;f__Thermococcaceae;g__Thermococcus;s__Thermococcus sp026986455	GCA_026986455.1	95	Potential new species	YES	First genome of named species
JCM 12540	Thermococcus coalescens	Valid	Type	Archaea; Methanobacteriati; Methanobacteriota; Thermococci; Thermococcales; Thermococcaceae	d__Archaea;p__Methanobacteriota_B;c__Thermococci;o__Thermococcales;f__Thermococcaceae;g__Thermococcus;s__	N/A	N/A	Potential new species	YES	First genome at species level
JCM 10128	Thermococcus fumicolans	Valid	Type	Archaea; Methanobacteriati; Methanobacteriota; Thermococci; Thermococcales; Thermococcaceae	d__Archaea;p__Methanobacteriota_B;c__Thermococci;o__Thermococcales;f__Thermococcaceae;g__Thermococcus;s__	N/A	N/A	Potential new species	YES	First genome at species level
JCM 11825	Thermococcus marinus	Invalid	Type	Archaea; Methanobacteriati; Methanobacteriota; Thermococci; Thermococcales; Thermococcaceae	d__Archaea;p__Methanobacteriota_B;c__Thermococci;o__Thermococcales;f__Thermococcaceae;g__Thermococcus;s__Thermococcus eurythermalis	GCF_000769655.1	95	Thermococcus eurythermalis	YES	Potentially different species
JCM 16307	Thermococcus prieurii	Valid	Type	Archaea; Methanobacteriati; Methanobacteriota; Thermococci; Thermococcales; Thermococcaceae	d__Archaea;p__Methanobacteriota_B;c__Thermococci;o__Thermococcales;f__Thermococcaceae;g__Thermococcus;s__	N/A	N/A	Potential new species	YES	First genome at species level
JCM 11816	Thermococcus sp.	N.A.	Non-type	Archaea; Methanobacteriati; Methanobacteriota; Thermococci; Thermococcales; Thermococcaceae	d__Archaea;p__Methanobacteriota_B;c__Thermococci;o__Thermococcales;f__Thermococcaceae;g__Thermococcus;s__Thermococcus kodakarensis	GCF_000009965.1	95	Thermococcus kodakarensis	YES	Known species
JCM 10985	Thermococcus waiotapuensis	Valid	Type	Archaea; Methanobacteriati; Methanobacteriota; Thermococci; Thermococcales; Thermococcaceae	d__Archaea;p__Methanobacteriota_B;c__Thermococci;o__Thermococcales;f__Thermococcaceae;g__Thermococcus;s__Thermococcus zilligii	GCF_000258515.1	95	Thermococcus waiotapuensis	NO	Potentially different species
JCM 13583	Thermogymnomonas acidicola	Valid	Type	Archaea; Methanobacteriati; Thermoplasmatota; Thermoplasmata; Thermoplasmatales	d__Archaea;p__Thermoplasmatota;c__Thermoplasmata;o__Thermoplasmatales;f__Thermoplasmataceae;g__Thermogymnomonas;s__Thermogymnomonas acidicola	GCF_001316105.1	95	Thermogymnomonas acidicola	NO	Same species
JCM 11320	Acidilobus aceticus	Valid	Type	Archaea; Thermoproteati; Thermoproteota; Thermoprotei; Acidilobales; Acidilobaceae	d__Archaea;p__Thermoproteota;c__Thermoprotei_A;o__Sulfolobales;f__Acidilobaceae;g__Acidilobus;s__Acidilobus saccharovorans	GCF_000144915.1	95	Potential new species	YES	Potentially different species
JCM 13516	Caldococcus noboribetus	Invalid	Type	Archaea; Thermoproteati; Thermoproteota; Thermoprotei; Desulfurococcales	d__Archaea;p__Thermoproteota;c__Thermoprotei_A;o__Sulfolobales;f__Acidilobaceae;g__Acidilobus;s__	N/A	N/A	Potential new species	YES	First genome at species level
JCM 10135	Stetteria hydrogenophila	Valid	Type	Archaea; Thermoproteati; Thermoproteota; Thermoprotei; Desulfurococcales; Desulfurococcaceae	d__Archaea;p__Thermoproteota;c__Thermoprotei_A;o__Sulfolobales;f__Acidilobaceae;g__JALURD01;s__	N/A	N/A	Potential new species	YES	First genome of isolates at genus or higher level
JCM 10309	Sulfophobococcus zilligii	Valid	Type	Archaea; Thermoproteati; Thermoproteota; Thermoprotei; Desulfurococcales; Desulfurococcaceae	d__Archaea;p__Thermoproteota;c__Thermoprotei_A;o__Sulfolobales;f__Desulfurococcaceae;g__UBA285;s__UBA285 sp002495025	GCA_002495025.1	95	Potential new species	YES	First genome of isolates at genus or higher level
JCM 11597	Thermodiscus maritimus	Valid	Type	Archaea; Thermoproteati; Thermoproteota; Thermoprotei; Desulfurococcales; Desulfurococcaceae	d__Archaea;p__Thermoproteota;c__Thermoprotei_A;o__Sulfolobales;f__Acidilobaceae;g__Thermodiscus;s__	N/A	N/A	Potential new species	YES	First genome of isolates at genus or higher level
JCM 9392	Pyrodictium brockii	Valid	Type	Archaea; Thermoproteati; Thermoproteota; Thermoprotei; Desulfurococcales; Pyrodictiaceae	d__Archaea;p__Thermoproteota;c__Thermoprotei_A;o__Sulfolobales;f__Pyrodictiaceae;g__Pyrodictium;s__Pyrodictium occultum	GCF_001462395.1	95	Pyrodictium occultum	YES	Potentially different species
JCM 10088	Thermocladium modestius	Valid	Type	Archaea; Thermoproteati; Thermoproteota; Thermoprotei; Thermoproteales; Thermocladiaceae	d__Archaea;p__Thermoproteota;c__Thermoprotei;o__Thermoproteales;f__Thermocladiaceae;g__Thermocladium;s__Thermocladium modestius	GCA_001315925.1	95	Thermocladium modestius	NO	Same species
JCM 9190	Pyrobaculum organotrophum	Valid	Type	Archaea; Thermoproteati; Thermoproteota; Thermoprotei; Thermoproteales; Thermoproteaceae	d__Archaea;p__Thermoproteota;c__Thermoprotei;o__Thermoproteales;f__Thermoproteaceae;g__Pyrobaculum;s__Pyrobaculum islandicum	GCF_000015205.1	95	Pyrobaculum islandicum	YES	Potentially different species
JCM 17229	Thermoproteus thermophilus	Valid	Type	Archaea; Thermoproteati; Thermoproteota; Thermoprotei; Thermoproteales; Thermoproteaceae	d__Archaea;p__Thermoproteota;c__Thermoprotei;o__Thermoproteales;f__Thermoproteaceae;g__Thermoproteus;s__	N/A	N/A	Potential new species	YES	First genome at species level
JCM 14467	Vulcanisaeta sp.	N.A.	Non-type	Archaea; Thermoproteati; Thermoproteota; Thermoprotei; Thermoproteales; Thermoproteaceae	d__Archaea;p__Thermoproteota;c__Thermoprotei;o__Thermoproteales;f__Thermocladiaceae;g__Vulcanisaeta;s__Vulcanisaeta sp001316245	GCF_001316245.1	95	Potential new species	NO	Potentially novel species
JCM 16159	Vulcanisaeta sp.	N.A.	Non-type	Archaea; Thermoproteati; Thermoproteota; Thermoprotei; Thermoproteales; Thermoproteaceae	d__Archaea;p__Thermoproteota;c__Thermoprotei;o__Thermoproteales;f__Thermocladiaceae;g__Vulcanisaeta;s__Vulcanisaeta sp001316265	GCF_001316265.1	95	Potential new species	NO	Potentially novel species
JCM 16161	Vulcanisaeta sp.	N.A.	Non-type	Archaea; Thermoproteati; Thermoproteota; Thermoprotei; Thermoproteales; Thermoproteaceae	d__Archaea;p__Thermoproteota;c__Thermoprotei;o__Thermoproteales;f__Thermocladiaceae;g__Vulcanisaeta;s__	N/A	N/A	Potential new species	NO	Potentially novel species
JCM 1254	Bifidobacterium bifidum	Valid	Non-type	Bacteria; Bacillati; Actinomycetota; Actinomycetes; Bifidobacteriales; Bifidobacteriaceae	d__Bacteria;p__Actinomycetota;c__Actinomycetes;o__Actinomycetales;f__Bifidobacteriaceae;g__Bifidobacterium;s__Bifidobacterium bifidum	GCF_001025135.1	95	Potential new species	NO	Same species
JCM 1272	Bifidobacterium longum subsp. infantis	Valid	Non-type	Bacteria; Bacillati; Actinomycetota; Actinomycetes; Bifidobacteriales; Bifidobacteriaceae	d__Bacteria;p__Actinomycetota;c__Actinomycetes;o__Actinomycetales;f__Bifidobacteriaceae;g__Bifidobacterium;s__Bifidobacterium infantis	GCF_000269965.1	95.05	Potential new species	YES	Same species
JCM 9957	Kineosporia succinea	Valid	Type	Bacteria; Bacillati; Actinomycetota; Actinomycetes; Kineosporiales; Kineosporiaceae	d__Bacteria;p__Actinomycetota;c__Actinomycetes;o__Actinomycetales;f__Kineosporiaceae;g__Kineosporia;s__Kineosporia succinea	GCF_030811555.1	95	Potential new species	NO	Same species
JCM 13580	Streptomyces drozdowiczii	Valid	Type	Bacteria; Bacillati; Actinomycetota; Actinomycetes; Kitasatosporales; Streptomycetaceae	d__Bacteria;p__Actinomycetota;c__Actinomycetes;o__Streptomycetales;f__Streptomycetaceae;g__Streptomyces;s__Streptomyces drozdowiczii	GCF_039534625.1	95	Streptomyces drozdowiczii	NO	Same species
JCM 12681	Streptomyces mexicanus	Valid	Type	Bacteria; Bacillati; Actinomycetota; Actinomycetes; Kitasatosporales; Streptomycetaceae	d__Bacteria;p__Actinomycetota;c__Actinomycetes;o__Streptomycetales;f__Streptomycetaceae;g__Streptomyces;s__Streptomyces mexicanus	GCF_039534585.1	95	Streptomyces mexicanus	NO	Same species
JCM 4814	Streptomyces phaeofaciens	Valid	Type	Bacteria; Bacillati; Actinomycetota; Actinomycetes; Kitasatosporales; Streptomycetaceae	d__Bacteria;p__Actinomycetota;c__Actinomycetes;o__Streptomycetales;f__Streptomycetaceae;g__Streptomyces;s__Streptomyces phaeofaciens	GCF_014648915.1	95	Streptomyces phaeofaciens	NO	Same species
JCM 4914	Streptomyces platensis subsp. malvinus	Valid	Type	Bacteria; Bacillati; Actinomycetota; Actinomycetes; Kitasatosporales; Streptomycetaceae	d__Bacteria;p__Actinomycetota;c__Actinomycetes;o__Streptomycetales;f__Streptomycetaceae;g__Streptomyces;s__Streptomyces sp040640655	GCF_040640655.1	95	Potential new species	YES	First genome of named species
JCM 18897	Streptomyces sp.	N.A.	Non-type	Bacteria; Bacillati; Actinomycetota; Actinomycetes; Kitasatosporales; Streptomycetaceae	d__Bacteria;p__Actinomycetota;c__Actinomycetes;o__Streptomycetales;f__Streptomycetaceae;g__Streptomyces;s__Streptomyces albidoflavus	GCF_000719955.1	95	Streptomyces albidoflavus	YES	Known species
JCM 18882	Brevibacterium metallidurans	Valid	Type	Bacteria; Bacillati; Actinomycetota; Actinomycetes; Micrococcales; Brevibacteriaceae	d__Bacteria;p__Actinomycetota;c__Actinomycetes;o__Actinomycetales;f__Brevibacteriaceae;g__Brevibacterium;s__Brevibacterium metallidurans	GCF_037101285.1	95	Potential new species	NO	Same species
JCM 16927	Cellulomonas chitinilytica	Valid	Type	Bacteria; Bacillati; Actinomycetota; Actinomycetes; Micrococcales; Cellulomonadaceae	d__Bacteria;p__Actinomycetota;c__Actinomycetes;o__Actinomycetales;f__Cellulomonadaceae;g__Cellulomonas;s__Cellulomonas chitinilytica	GCF_016862675.1	95	Potential new species	NO	Same species
JCM 18110	Cellulomonas iranensis	Valid	Type	Bacteria; Bacillati; Actinomycetota; Actinomycetes; Micrococcales; Cellulomonadaceae	d__Bacteria;p__Actinomycetota;c__Actinomycetes;o__Actinomycetales;f__Cellulomonadaceae;g__Cellulomonas;s__Cellulomonas iranensis	GCF_001552375.1	95.04	Potential new species	NO	Same species
JCM 18755	Cellulomonas pakistanensis	Valid	Type	Bacteria; Bacillati; Actinomycetota; Actinomycetes; Micrococcales; Cellulomonadaceae	d__Bacteria;p__Actinomycetota;c__Actinomycetes;o__Actinomycetales;f__Cellulomonadaceae;g__Cellulomonas;s__Cellulomonas pakistanensis	GCF_016862755.1	95	Potential new species	NO	Same species
JCM 18111	Cellulomonas persica	Valid	Type	Bacteria; Bacillati; Actinomycetota; Actinomycetes; Micrococcales; Cellulomonadaceae	d__Bacteria;p__Actinomycetota;c__Actinomycetes;o__Actinomycetales;f__Cellulomonadaceae;g__Cellulomonas;s__Cellulomonas persica	GCF_007989825.1	95	Potential new species	NO	Same species
JCM 9808	Cellulomonas sp.	N.A.	Non-type	Bacteria; Bacillati; Actinomycetota; Actinomycetes; Micrococcales; Cellulomonadaceae	d__Bacteria;p__Actinomycetota;c__Actinomycetes;o__Actinomycetales;f__Cellulomonadaceae;g__Cellulosimicrobium;s__Cellulosimicrobium funkei	GCF_004519295.1	95.74	Oerskovia xanthineolytica	NO	Known species
JCM 15471	Brachybacterium zhongshanense	Valid	Type	Bacteria; Bacillati; Actinomycetota; Actinomycetes; Micrococcales; Dermabacteraceae	d__Bacteria;p__Actinomycetota;c__Actinomycetes;o__Actinomycetales;f__Dermabacteraceae;g__Brachybacterium;s__	N/A	N/A	Potential new species	NO	First genome at species level
JCM 13591	Microbacterium xylanilyticum	Valid	Type	Bacteria; Bacillati; Actinomycetota; Actinomycetes; Micrococcales; Microbacteriaceae	d__Bacteria;p__Actinomycetota;c__Actinomycetes;o__Actinomycetales;f__Microbacteriaceae;g__Microbacterium;s__	N/A	N/A	Potential new species	NO	First genome at species level
JCM 14115	Paenarthrobacter nitroguajacolicus	Valid	Type	Bacteria; Bacillati; Actinomycetota; Actinomycetes; Micrococcales; Micrococcaceae	d__Bacteria;p__Actinomycetota;c__Actinomycetes;o__Actinomycetales;f__Micrococcaceae;g__Arthrobacter;s__Arthrobacter nitroguajacolicus	GCF_001375615.1	95	Paenarthrobacter nitroguajacolicus	NO	Same species
JCM 11754	Isoptericola variabilis	Valid	Type	Bacteria; Bacillati; Actinomycetota; Actinomycetes; Micrococcales; Promicromonosporaceae	d__Bacteria;p__Actinomycetota;c__Actinomycetes;o__Actinomycetales;f__Cellulomonadaceae;g__Isoptericola;s__Isoptericola sp035565815	GCA_035565815.1	95	Potential new species	NO	First genome of named species
JCM 9534	Catenuloplanes indicus	Valid	Type	Bacteria; Bacillati; Actinomycetota; Actinomycetes; Micromonosporales; Micromonosporaceae	d__Bacteria;p__Actinomycetota;c__Actinomycetes;o__Mycobacteriales;f__Micromonosporaceae;g__Catenuloplanes;s__Catenuloplanes indicus	GCF_030813715.1	95	Potential new species	NO	Same species
JCM 9533	Catenuloplanes niger	Valid	Type	Bacteria; Bacillati; Actinomycetota; Actinomycetes; Micromonosporales; Micromonosporaceae	d__Bacteria;p__Actinomycetota;c__Actinomycetes;o__Mycobacteriales;f__Micromonosporaceae;g__Catenuloplanes;s__Catenuloplanes niger	GCF_031458255.1	95	Potential new species	NO	Same species
JCM 7447	Corynebacterium amycolatum	Valid	Type	Bacteria; Bacillati; Actinomycetota; Actinomycetes; Mycobacteriales; Corynebacteriaceae	d__Bacteria;p__Actinomycetota;c__Actinomycetes;o__Mycobacteriales;f__Mycobacteriaceae;g__Corynebacterium;s__Corynebacterium amycolatum	GCF_016889425.1	95	Potential new species	YES	Same species
JCM 12107	Corynebacterium simulans	Valid	Type	Bacteria; Bacillati; Actinomycetota; Actinomycetes; Mycobacteriales; Corynebacteriaceae	d__Bacteria;p__Actinomycetota;c__Actinomycetes;o__Mycobacteriales;f__Mycobacteriaceae;g__Corynebacterium;s__Corynebacterium simulans	GCF_001586215.1	95	Potential new species	YES	Same species
JCM 15430	Mycobacterium avium	Valid	Non-type	Bacteria; Bacillati; Actinomycetota; Actinomycetes; Mycobacteriales; Mycobacteriaceae	d__Bacteria;p__Actinomycetota;c__Actinomycetes;o__Mycobacteriales;f__Mycobacteriaceae;g__Mycobacterium;s__Mycobacterium avium	GCF_009741445.1	95	Potential new species	YES	Same species
JCM 16369	Mycolicibacterium crocinum	Valid	Type	Bacteria; Bacillati; Actinomycetota; Actinomycetes; Mycobacteriales; Mycobacteriaceae	d__Bacteria;p__Actinomycetota;c__Actinomycetes;o__Mycobacteriales;f__Mycobacteriaceae;g__Mycobacterium;s__Mycobacterium crocinum	GCF_022370635.2	95	Potential new species	NO	Same species
JCM 12141	Mycolicibacterium hodleri	Valid	Type	Bacteria; Bacillati; Actinomycetota; Actinomycetes; Mycobacteriales; Mycobacteriaceae	d__Bacteria;p__Actinomycetota;c__Actinomycetes;o__Mycobacteriales;f__Mycobacteriaceae;g__Mycobacterium;s__Mycobacterium hodleri	GCF_025822245.1	95	Potential new species	NO	Same species
JCM 16370	Mycolicibacterium pallens	Valid	Type	Bacteria; Bacillati; Actinomycetota; Actinomycetes; Mycobacteriales; Mycobacteriaceae	d__Bacteria;p__Actinomycetota;c__Actinomycetes;o__Mycobacteriales;f__Mycobacteriaceae;g__Mycobacterium;s__Mycobacterium crocinum	GCF_022370635.2	95	Potential new species	NO	Potentially different species
JCM 15927	Mycolicibacterium pyrenivorans	Valid	Type	Bacteria; Bacillati; Actinomycetota; Actinomycetes; Mycobacteriales; Mycobacteriaceae	d__Bacteria;p__Actinomycetota;c__Actinomycetes;o__Mycobacteriales;f__Mycobacteriaceae;g__Mycobacterium;s__Mycobacterium pyrenivorans	GCF_025821625.1	95	Potential new species	NO	Same species
JCM 9803	Rhodococcus erythropolis	Valid	Non-type	Bacteria; Bacillati; Actinomycetota; Actinomycetes; Mycobacteriales; Nocardiaceae	d__Bacteria;p__Actinomycetota;c__Actinomycetes;o__Mycobacteriales;f__Mycobacteriaceae;g__Rhodococcus_F;s__Rhodococcus_F qingshengii	GCF_023221595.1	95.17	Rhodococcus qingshengii	NO	Same species
JCM 9804	Rhodococcus erythropolis	Valid	Non-type	Bacteria; Bacillati; Actinomycetota; Actinomycetes; Mycobacteriales; Nocardiaceae	d__Bacteria;p__Actinomycetota;c__Actinomycetes;o__Mycobacteriales;f__Mycobacteriaceae;g__Rhodococcus_F;s__Rhodococcus_F qingshengii	GCF_023221595.1	95.17	Rhodococcus qingshengii	NO	Same species
JCM 9805	Rhodococcus erythropolis	Valid	Non-type	Bacteria; Bacillati; Actinomycetota; Actinomycetes; Mycobacteriales; Nocardiaceae	d__Bacteria;p__Actinomycetota;c__Actinomycetes;o__Mycobacteriales;f__Mycobacteriaceae;g__Rhodococcus_F;s__Rhodococcus_F qingshengii	GCF_023221595.1	95.17	Rhodococcus qingshengii	NO	Same species
JCM 9791	Rhodococcus sp.	N.A.	Non-type	Bacteria; Bacillati; Actinomycetota; Actinomycetes; Mycobacteriales; Nocardiaceae	d__Bacteria;p__Actinomycetota;c__Actinomycetes;o__Mycobacteriales;f__Mycobacteriaceae;g__Rhodococcus;s__Rhodococcus sp001312645	GCA_001312645.1	95	Potential new species	YES	Potentially novel species
JCM 9793	Rhodococcus sp.	N.A.	Non-type	Bacteria; Bacillati; Actinomycetota; Actinomycetes; Mycobacteriales; Nocardiaceae	d__Bacteria;p__Actinomycetota;c__Actinomycetes;o__Mycobacteriales;f__Mycobacteriaceae;g__Rhodococcus;s__Rhodococcus sp001312645	GCA_001312645.1	95	Potential new species	YES	Potentially novel species
JCM 10703	Nocardioides nitrophenolicus	Valid	Type	Bacteria; Bacillati; Actinomycetota; Actinomycetes; Propionibacteriales; Nocardioidaceae	d__Bacteria;p__Actinomycetota;c__Actinomycetes;o__Propionibacteriales;f__Nocardioidaceae;g__Nocardioides;s__Nocardioides nitrophenolicus	GCF_016907515.1	95	Potential new species	NO	Same species
JCM 10369	Nocardioides pyridinolyticus	Valid	Type	Bacteria; Bacillati; Actinomycetota; Actinomycetes; Propionibacteriales; Nocardioidaceae	d__Bacteria;p__Actinomycetota;c__Actinomycetes;o__Propionibacteriales;f__Nocardioidaceae;g__Nocardioides;s__	N/A	N/A	Potential new species	NO	First genome at species level
JCM 16518	Nocardioides sp.	N.A.	Non-type	Bacteria; Bacillati; Actinomycetota; Actinomycetes; Propionibacteriales; Nocardioidaceae	d__Bacteria;p__Actinomycetota;c__Actinomycetes;o__Propionibacteriales;f__Nocardioidaceae;g__Nocardioides;s__	N/A	N/A	Potential new species	NO	Potentially novel species
JCM 18899	Nocardioides sp.	N.A.	Non-type	Bacteria; Bacillati; Actinomycetota; Actinomycetes; Propionibacteriales; Nocardioidaceae	d__Bacteria;p__Actinomycetota;c__Actinomycetes;o__Propionibacteriales;f__Nocardioidaceae;g__Nocardioides;s__	N/A	N/A	Potential new species	YES	Potentially novel species
JCM 18998	Nocardioides sp.	N.A.	Non-type	Bacteria; Bacillati; Actinomycetota; Actinomycetes; Propionibacteriales; Nocardioidaceae	d__Bacteria;p__Actinomycetota;c__Actinomycetes;o__Propionibacteriales;f__Nocardioidaceae;g__Nocardioides;s__	N/A	N/A	Potential new species	YES	Potentially novel species
JCM 18999	Nocardioides sp.	N.A.	Non-type	Bacteria; Bacillati; Actinomycetota; Actinomycetes; Propionibacteriales; Nocardioidaceae	d__Bacteria;p__Actinomycetota;c__Actinomycetes;o__Propionibacteriales;f__Nocardioidaceae;g__Nocardioides;s__	N/A	N/A	Potential new species	YES	Potentially novel species
JCM 18916	Cutibacterium acnes subsp. acnes	Valid	Non-type	Bacteria; Bacillati; Actinomycetota; Actinomycetes; Propionibacteriales; Propionibacteriaceae	d__Bacteria;p__Actinomycetota;c__Actinomycetes;o__Propionibacteriales;f__Propionibacteriaceae;g__Cutibacterium;s__Cutibacterium acnes	GCF_003030305.1	95	Potential new species	NO	Same species
JCM 18909	Cutibacterium acnes subsp. elongatum	Valid	Non-type	Bacteria; Bacillati; Actinomycetota; Actinomycetes; Propionibacteriales; Propionibacteriaceae	d__Bacteria;p__Actinomycetota;c__Actinomycetes;o__Propionibacteriales;f__Propionibacteriaceae;g__Cutibacterium;s__Cutibacterium acnes	GCF_003030305.1	95	Potential new species	NO	Same species
JCM 3263	Thermobifida fusca	Valid	Type	Bacteria; Bacillati; Actinomycetota; Actinomycetes; Streptosporangiales; Nocardiopsidaceae	d__Bacteria;p__Actinomycetota;c__Actinomycetes;o__Streptosporangiales;f__Streptosporangiaceae;g__Thermobifida;s__Thermobifida fusca	GCF_001592045.1	95	Thermobifida fusca	NO	Same species
JCM 18997	Conexibacter sp.	N.A.	Non-type	Bacteria; Bacillati; Actinomycetota; Thermoleophilia; Solirubrobacterales; Conexibacteraceae	d__Bacteria;p__Actinomycetota;c__Thermoleophilia;o__Solirubrobacterales;f__Solirubrobacteraceae;g__Capillimicrobium;s__	N/A	N/A	Potential new species	YES	Potentially novel species
JCM 14450	Geobacillus stearothermophilus	Valid	Non-type	Bacteria; Bacillati; Bacillota; Bacilli; Bacillales; Anoxybacillaceae	d__Bacteria;p__Bacillota;c__Bacilli;o__Bacillales;f__Anoxybacillaceae;g__Geobacillus;s__Geobacillus stearothermophilus	GCF_030369615.1	96.52	Potential new species	YES	Same species
JCM 20266	Bacillus cereus	Valid	Non-type	Bacteria; Bacillati; Bacillota; Bacilli; Bacillales; Bacillaceae	d__Bacteria;p__Bacillota;c__Bacilli;o__Bacillales;f__Bacillaceae_G;g__Bacillus_A;s__Bacillus_A cereus	GCF_000007825.1	95	Potential new species	YES	Same species
JCM 10596	Caldalkalibacillus mannanilyticus	Valid	Type	Bacteria; Bacillati; Bacillota; Bacilli; Bacillales; Bacillaceae	d__Bacteria;p__Bacillota;c__Bacilli;o__Caldalkalibacillales;f__JCM-10596;g__Bacillus_AT;s__Bacillus_AT mannanilyticus	GCF_000615945.1	95	Potential new species	NO	Same species
JCM 21714	Gracilibacillus boraciitolerans	Valid	Type	Bacteria; Bacillati; Bacillota; Bacilli; Bacillales; Bacillaceae	d__Bacteria;p__Bacillota;c__Bacilli;o__Bacillales_D;f__Amphibacillaceae;g__Gracilibacillus;s__Gracilibacillus boraciitolerans	GCF_000521485.1	95	Potential new species	NO	Same species
JCM 18860	Gracilibacillus pakistanensis	Invalid	Non-type	Bacteria; Bacillati; Bacillota; Bacilli; Bacillales; Bacillaceae	d__Bacteria;p__Bacillota;c__Bacilli;o__Bacillales_D;f__Amphibacillaceae;g__Gracilibacillus;s__Gracilibacillus dipsosauri	GCF_003176895.1	95	Potential new species	NO	Potentially different species
JCM 18966	Gracilibacillus sp.	N.A.	Non-type	Bacteria; Bacillati; Bacillota; Bacilli; Bacillales; Bacillaceae	d__Bacteria;p__Bacillota;c__Bacilli;o__Bacillales_D;f__Amphibacillaceae;g__Gracilibacillus;s__Gracilibacillus dipsosauri	GCF_003176895.1	95	Potential new species	NO	Known species
JCM 9157	Halalkalibacter akibai	Valid	Type	Bacteria; Bacillati; Bacillota; Bacilli; Bacillales; Bacillaceae	d__Bacteria;p__Bacillota;c__Bacilli;o__Bacillales_H;f__Bacillaceae_D;g__Halalkalibacter;s__Halalkalibacter akibai	GCF_000513135.1	95	Potential new species	NO	Same species
JCM 9140	Halalkalibacter wakoensis	Valid	Type	Bacteria; Bacillati; Bacillota; Bacilli; Bacillales; Bacillaceae	d__Bacteria;p__Bacillota;c__Bacilli;o__Bacillales_H;f__Bacillaceae_D;g__Halalkalibacter;s__Halalkalibacter wakoensis	GCF_000513095.1	95	Potential new species	NO	Same species
JCM 12149	Lentibacillus halophilus	Valid	Type	Bacteria; Bacillati; Bacillota; Bacilli; Bacillales; Bacillaceae	d__Bacteria;p__Bacillota;c__Bacilli;o__Bacillales_D;f__Amphibacillaceae;g__Lentibacillus;s__Lentibacillus halophilus	GCF_039522485.1	95	Potential new species	NO	Same species
JCM 30234	Lentibacillus kimchii	Valid	Type	Bacteria; Bacillati; Bacillota; Bacilli; Bacillales; Bacillaceae	d__Bacteria;p__Bacillota;c__Bacilli;o__Bacillales_D;f__Amphibacillaceae;g__Lentibacillus;s__	N/A	N/A	Potential new species	NO	First genome at species level
JCM 18776	Lysinibacillus pakistanensis	Valid	Type	Bacteria; Bacillati; Bacillota; Bacilli; Bacillales; Bacillaceae	d__Bacteria;p__Bacillota;c__Bacilli;o__Bacillales_A;f__Planococcaceae;g__Lysinibacillus;s__Lysinibacillus pakistanensis	GCF_030123245.1	95	Potential new species	NO	Same species
JCM 12389	Salinibacillus aidingensis	Valid	Type	Bacteria; Bacillati; Bacillota; Bacilli; Bacillales; Bacillaceae	d__Bacteria;p__Bacillota;c__Bacilli;o__Bacillales_D;f__Alkalibacillaceae;g__Salinibacillus;s__Salinibacillus aidingensis	GCF_039522525.1	95	Salinibacillus aidingensis	NO	Same species
JCM 30907	Virgibacillus ainsalahensis	Invalid	Type	Bacteria; Bacillati; Bacillota; Bacilli; Bacillales; Bacillaceae	d__Bacteria;p__Bacillota;c__Bacilli;o__Bacillales_D;f__Amphibacillaceae;g__Virgibacillus;s__	N/A	N/A	Potential new species	NO	Same species
JCM 32284	Virgibacillus kimchii	Valid	Type	Bacteria; Bacillati; Bacillota; Bacilli; Bacillales; Bacillaceae	d__Bacteria;p__Bacillota;c__Bacilli;o__Bacillales_D;f__Amphibacillaceae;g__Virgibacillus;s__	N/A	N/A	Potential new species	NO	Same species
JCM 15395	Virgibacillus siamensis	Valid	Type	Bacteria; Bacillati; Bacillota; Bacilli; Bacillales; Bacillaceae	d__Bacteria;p__Bacillota;c__Bacilli;o__Bacillales_D;f__Amphibacillaceae;g__Lentibacillus;s__Lentibacillus siamensis	GCF_039522605.1	95	Virgibacillus siamensis	NO	Same species
JCM 7671	Listeria monocytogenes	Valid	Non-type	Bacteria; Bacillati; Bacillota; Bacilli; Bacillales; Listeriaceae	d__Bacteria;p__Bacillota;c__Bacilli;o__Lactobacillales;f__Listeriaceae;g__Listeria;s__Listeria monocytogenes	GCF_900187225.1	95	Potential new species	YES	Same species
JCM 16418	Paenibacillus pini	Valid	Type	Bacteria; Bacillati; Bacillota; Bacilli; Bacillales; Paenibacillaceae	d__Bacteria;p__Bacillota;c__Bacilli;o__Paenibacillales;f__Paenibacillaceae;g__Paenibacillus;s__Paenibacillus pini	GCF_000576305.1	95	Paenibacillus pini	NO	Same species
JCM 9795	Paenibacillus sp.	N.A.	Non-type	Bacteria; Bacillati; Bacillota; Bacilli; Bacillales; Paenibacillaceae	d__Bacteria;p__Bacillota;c__Bacilli;o__Paenibacillales;f__NBRC-103111;g__Paenibacillus_G;s__Paenibacillus_G validus	GCF_004000985.1	95	Paenibacillus validus	YES	Known species
JCM 9796	Paenibacillus sp.	N.A.	Non-type	Bacteria; Bacillati; Bacillota; Bacilli; Bacillales; Paenibacillaceae	d__Bacteria;p__Bacillota;c__Bacilli;o__Paenibacillales;f__NBRC-103111;g__Paenibacillus_G;s__Paenibacillus_G validus	GCF_004000985.1	95	Paenibacillus validus	YES	Known species
JCM 10914	Paenibacillus sp.	N.A.	Non-type	Bacteria; Bacillati; Bacillota; Bacilli; Bacillales; Paenibacillaceae	d__Bacteria;p__Bacillota;c__Bacilli;o__Paenibacillales;f__Paenibacillaceae;g__Paenibacillus;s__Paenibacillus sp001315105	GCF_001315105.1	95	Potential new species	NO	Potentially novel species
JCM 16163	Paenibacillus sp.	N.A.	Non-type	Bacteria; Bacillati; Bacillota; Bacilli; Bacillales; Paenibacillaceae	d__Bacteria;p__Bacillota;c__Bacilli;o__Paenibacillales;f__NBRC-103111;g__Paenibacillus_G;s__Paenibacillus_G naphthalenovorans	GCF_900099895.1	95	Paenibacillus naphthalenovorans	YES	Known species
JCM 18996	Paenibacillus sp.	N.A.	Non-type	Bacteria; Bacillati; Bacillota; Bacilli; Bacillales; Paenibacillaceae	d__Bacteria;p__Bacillota;c__Bacilli;o__Paenibacillales;f__NBRC-103111;g__;s__	N/A	N/A	Potential new species	YES	Potentially novel species
JCM 7540	Paenibacillus thiaminolyticus	Valid	Non-type	Bacteria; Bacillati; Bacillota; Bacilli; Bacillales; Paenibacillaceae	d__Bacteria;p__Bacillota;c__Bacilli;o__Paenibacillales;f__Paenibacillaceae;g__Paenibacillus_B;s__Paenibacillus_B thiaminolyticus	GCF_007066085.1	95	Paenibacillus thiaminolyticus	YES	Same species
JCM 2151	Staphylococcus aureus	Valid	Non-type	Bacteria; Bacillati; Bacillota; Bacilli; Bacillales; Staphylococcaceae	d__Bacteria;p__Bacillota;c__Bacilli;o__Staphylococcales;f__Staphylococcaceae;g__Staphylococcus;s__Staphylococcus aureus	GCF_001027105.1	95	Staphylococcus aureus	YES	Same species
JCM 2179	Staphylococcus aureus	Valid	Non-type	Bacteria; Bacillati; Bacillota; Bacilli; Bacillales; Staphylococcaceae	d__Bacteria;p__Bacillota;c__Bacilli;o__Staphylococcales;f__Staphylococcaceae;g__Staphylococcus;s__Staphylococcus aureus	GCF_001027105.1	95	Staphylococcus aureus	YES	Same species
JCM 8702	Staphylococcus aureus	Valid	Non-type	Bacteria; Bacillati; Bacillota; Bacilli; Bacillales; Staphylococcaceae	d__Bacteria;p__Bacillota;c__Bacilli;o__Staphylococcales;f__Staphylococcaceae;g__Staphylococcus;s__Staphylococcus aureus	GCF_001027105.1	95	Staphylococcus aureus	YES	Same species
JCM 14719	Calditerricola satsumensis	Valid	Type	Bacteria; Bacillati; Bacillota; Bacilli; Calditerricolales; Calditerricolaceae	d__Bacteria;p__Bacillota;c__Bacilli;o__Calditerricolales;f__Calditerricolaceae;g__Calditerricola;s__Calditerricola satsumensis	GCF_014646935.1	95	Potential new species	NO	Same species
JCM 14720	Calditerricola yamamurae	Valid	Type	Bacteria; Bacillati; Bacillota; Bacilli; Calditerricolales; Calditerricolaceae	d__Bacteria;p__Bacillota;c__Bacilli;o__Calditerricolales;f__Calditerricolaceae;g__Calditerricola;s__Calditerricola sp017577925	GCA_017577925.1	95	Potential new species	YES	First genome of named species
JCM 20313	Enterococcus faecalis	Valid	Non-type	Bacteria; Bacillati; Bacillota; Bacilli; Lactobacillales; Enterococcaceae	d__Bacteria;p__Bacillota;c__Bacilli;o__Lactobacillales;f__Enterococcaceae;g__Enterococcus_B;s__Enterococcus_B lactis	GCF_015751045.1	95	Potential new species	YES	Known species
JCM 31185	Furfurilactobacillus curtus	Valid	Type	Bacteria; Bacillati; Bacillota; Bacilli; Lactobacillales; Lactobacillaceae	d__Bacteria;p__Bacillota;c__Bacilli;o__Lactobacillales;f__Lactobacillaceae;g__Furfurilactobacillus;s__	N/A	N/A	Potential new species	YES	First genome at species level
JCM 17300	Ligilactobacillus faecis	Valid	Type	Bacteria; Bacillati; Bacillota; Bacilli; Lactobacillales; Lactobacillaceae	d__Bacteria;p__Bacillota;c__Bacilli;o__Lactobacillales;f__Lactobacillaceae;g__Ligilactobacillus;s__Ligilactobacillus faecis	GCF_029889745.1	95	Potential new species	YES	Same species
JCM 18671	Secundilactobacillus oryzae	Valid	Type	Bacteria; Bacillati; Bacillota; Bacilli; Lactobacillales; Lactobacillaceae	d__Bacteria;p__Bacillota;c__Bacilli;o__Lactobacillales;f__Lactobacillaceae;g__Secundilactobacillus;s__Secundilactobacillus oryzae	GCF_000740055.1	95	Secundilactobacillus oryzae	NO	Same species
JCM 31116	Streptococcus alactolyticus	Valid	Type	Bacteria; Bacillati; Bacillota; Bacilli; Lactobacillales; Streptococcaceae	d__Bacteria;p__Bacillota;c__Bacilli;o__Lactobacillales;f__Streptococcaceae;g__Streptococcus;s__Streptococcus faecavium	GCA_019116645.1	95	Potential new species	YES	Potentially different species
JCM 5802	Streptococcus equinus	Valid	Non-type	Bacteria; Bacillati; Bacillota; Bacilli; Lactobacillales; Streptococcaceae	d__Bacteria;p__Bacillota;c__Bacilli;o__Lactobacillales;f__Streptococcaceae;g__Streptococcus;s__Streptococcus equinus	GCF_000187265.1	95	Streptococcus equinus	YES	Same species
JCM 12261	Streptococcus gallolyticus subsp. pasteurianus	Valid	Type	Bacteria; Bacillati; Bacillota; Bacilli; Lactobacillales; Streptococcaceae	d__Bacteria;p__Bacillota;c__Bacilli;o__Lactobacillales;f__Streptococcaceae;g__Streptococcus;s__Streptococcus pasteurianus	GCF_004843545.1	96.18	Streptococcus gallolyticus	YES	Same species
JCM 5176	Streptococcus sobrinus	Valid	Non-type	Bacteria; Bacillati; Bacillota; Bacilli; Lactobacillales; Streptococcaceae	d__Bacteria;p__Bacillota;c__Bacilli;o__Lactobacillales;f__Streptococcaceae;g__Streptococcus;s__Streptococcus sobrinus	GCF_000686605.1	95	Streptococcus sobrinus	YES	Same species
JCM 16981	Salinicoccus jeotgali	Valid	Type	Bacteria; Bacillati; Bacillota; Bacilli; Staphylococcales; Salinicoccaceae	d__Bacteria;p__Bacillota;c__Bacilli;o__Staphylococcales;f__Salinicoccaceae;g__Salinicoccus;s__Salinicoccus jeotgali	GCF_039538805.1	95	Salinicoccus jeotgali	NO	Same species
JCM 19029	Salinicoccus sesuvii	Valid	Type	Bacteria; Bacillati; Bacillota; Bacilli; Staphylococcales; Salinicoccaceae	d__Bacteria;p__Bacillota;c__Bacilli;o__Staphylococcales;f__Salinicoccaceae;g__Salinicoccus;s__	N/A	N/A	Potential new species	NO	First genome at species level
JCM 12822	Salinicoccus siamensis	Valid	Type	Bacteria; Bacillati; Bacillota; Bacilli; Staphylococcales; Salinicoccaceae	d__Bacteria;p__Bacillota;c__Bacilli;o__Staphylococcales;f__Salinicoccaceae;g__Salinicoccus;s__	N/A	N/A	Potential new species	NO	First genome at species level
JCM 19376	Fusibacter bizertensis	Valid	Type	Bacteria; Bacillati; Bacillota; Clostridia; Eubacteriales	d__Bacteria;p__Bacillota;c__Clostridia;o__Peptostreptococcales;f__Acidaminobacteraceae;g__Fusibacter_C;s__	N/A	N/A	Potential new species	YES	First genome at species level
JCM 19912	Fusibacter fontis	Valid	Type	Bacteria; Bacillati; Bacillota; Clostridia; Eubacteriales	d__Bacteria;p__Bacillota;c__Clostridia;o__Peptostreptococcales;f__Acidaminobacteraceae;g__Fusibacter_C;s__	N/A	N/A	Potential new species	YES	First genome at species level
JCM 13267	Howardella ureilytica	Valid	Type	Bacteria; Bacillati; Bacillota; Clostridia; Eubacteriales	d__Bacteria;p__Bacillota;c__Clostridia;o__Lachnospirales;f__Lachnospiraceae;g__UBA4285;s__UBA4285 sp022769005	GCA_022769005.1	95	Potential new species	YES	First genome of isolates at genus or higher level
JCM 30795	Agathobaculum butyriciproducens	Valid	Type	Bacteria; Bacillati; Bacillota; Clostridia; Eubacteriales; Butyricicoccaceae	d__Bacteria;p__Bacillota;c__Clostridia;o__Oscillospirales;f__Butyricicoccaceae;g__Agathobaculum;s__Agathobaculum butyriciproducens	GCF_003096535.1	95	Potential new species	YES	Same species
JCM 1385	Clostridium baratii	Valid	Type	Bacteria; Bacillati; Bacillota; Clostridia; Eubacteriales; Clostridiaceae	d__Bacteria;p__Bacillota;c__Clostridia;o__Clostridiales;f__Clostridiaceae;g__Clostridium;s__Clostridium nitritogenes	GCF_039521545.1	95.23	Potential new species	YES	Same species
JCM 9989	Clostridium budayi	Valid	Type	Bacteria; Bacillati; Bacillota; Clostridia; Eubacteriales; Clostridiaceae	d__Bacteria;p__Bacillota;c__Clostridia;o__Clostridiales;f__Clostridiaceae;g__Clostridium;s__	N/A	N/A	Potential new species	YES	First genome at species level
JCM 1393	Clostridium carnis	Valid	Type	Bacteria; Bacillati; Bacillota; Clostridia; Eubacteriales; Clostridiaceae	d__Bacteria;p__Bacillota;c__Clostridia;o__Clostridiales;f__Clostridiaceae;g__Clostridium;s__	N/A	N/A	Potential new species	YES	Same species
JCM 14030	Clostridium nitrophenolicum	Valid	Type	Bacteria; Bacillati; Bacillota; Clostridia; Eubacteriales; Clostridiaceae	d__Bacteria;p__Bacillota;c__Clostridia;o__Clostridiales;f__Clostridiaceae;g__Clostridium_AM;s__	N/A	N/A	Potential new species	YES	First genome at species level
JCM 1406	Clostridium novyi	Valid	Type	Bacteria; Bacillati; Bacillota; Clostridia; Eubacteriales; Clostridiaceae	d__Bacteria;p__Bacillota;c__Clostridia;o__Clostridiales;f__Clostridiaceae;g__Clostridium_H;s__Clostridium_H novyi	GCF_000014125.1	95	Potential new species	YES	Same species
JCM 10519	Clostridium sp.	N.A.	Non-type	Bacteria; Bacillati; Bacillota; Clostridia; Eubacteriales; Clostridiaceae	d__Bacteria;p__Bacillota;c__Clostridia;o__Lachnospirales;f__Lachnospiraceae;g__Lacrimispora;s__Lacrimispora sp031270005	GCA_031270005.1	95	Potential new species	YES	Potentially novel species
JCM 21531	Acetivibrio straminisolvens	Valid	Type	Bacteria; Bacillati; Bacillota; Clostridia; Eubacteriales; Oscillospiraceae	d__Bacteria;p__Bacillota;c__Clostridia;o__Acetivibrionales;f__Acetivibrionaceae;g__Hungateiclostridium;s__Hungateiclostridium straminisolvens	GCF_000521465.1	95	Potential new species	NO	Same species
JCM 17042	Ruminococcus champanellensis	Valid	Type	Bacteria; Bacillati; Bacillota; Clostridia; Eubacteriales; Oscillospiraceae	d__Bacteria;p__Bacillota;c__Clostridia;o__Oscillospirales;f__Ruminococcaceae;g__Ruminococcus_F;s__Ruminococcus_F champanellensis	GCF_000210095.1	95	Ruminococcus champanellensis	NO	Same species
JCM 17209	Desulfovectis peckii	Valid	Type	Bacteria; Bacillati; Bacillota; Clostridia; Eubacteriales; Peptococcaceae	d__Bacteria;p__Bacillota;c__Desulfotomaculia;o__Desulfotomaculales;f__Desulfohalotomaculaceae;g__;s__	N/A	N/A	Potential new species	YES	First genome of isolates at genus or higher level
JCM 15048	Symbiobacterium ostreiconchae	Valid	Type	Bacteria; Bacillati; Bacillota; Clostridia; Eubacteriales; Symbiobacteriaceae	d__Bacteria;p__Bacillota;c__Symbiobacteriia;o__Symbiobacteriales;f__Symbiobacteriaceae;g__Symbiobacterium;s__	N/A	N/A	Potential new species	YES	First genome at species level
JCM 15996	Symbiobacterium turbinis	Valid	Type	Bacteria; Bacillati; Bacillota; Clostridia; Eubacteriales; Symbiobacteriaceae	d__Bacteria;p__Bacillota;c__Symbiobacteriia;o__Symbiobacteriales;f__Symbiobacteriaceae;g__Symbiobacterium;s__Symbiobacterium sp023623185	GCA_023623185.1	95	Potential new species	YES	First genome of named species
JCM 18213	Halanaerobium sehlinense	Valid	Type	Bacteria; Bacillati; Bacillota; Clostridia; Halanaerobiales; Halanaerobiaceae	d__Bacteria;p__Bacillota;c__Halanaerobiia;o__Halanaerobiales;f__Halanaerobiaceae;g__Halanaerobium;s__	N/A	N/A	Potential new species	YES	First genome at species level
JCM 15060	Halanaerobaculum tunisiense	Valid	Type	Bacteria; Bacillati; Bacillota; Clostridia; Halanaerobiales; Halobacteroidaceae	d__Bacteria;p__Bacillota;c__Halanaerobiia;o__Halobacteroidales;f__Halobacteroidaceae;g__Halobacteroides;s__	N/A	N/A	Potential new species	YES	First genome at species level
JCM 16358	Halanaerocella petrolearia	Invalid	Type	Bacteria; Bacillati; Bacillota; Clostridia; Halanaerobiales; Halobacteroidaceae	d__Bacteria;p__Bacillota;c__Halanaerobiia;o__Halobacteroidales;f__Halobacteroidaceae;g__Halobacteroides;s__	N/A	N/A	Potential new species	YES	First genome at species level
JCM 16312	Defluviitalea saccharophila	Valid	Type	Bacteria; Bacillati; Bacillota; Clostridia; Lachnospirales; Defluviitaleaceae	d__Bacteria;p__Bacillota;c__Clostridia;o__Lachnospirales;f__Defluviitaleaceae;g__Defluviitalea;s__Defluviitalea saccharophila	GCF_038396635.1	95	Potential new species	NO	Same species
JCM 17205	Blautia faecis	Valid	Type	Bacteria; Bacillati; Bacillota; Clostridia; Lachnospirales; Lachnospiraceae	d__Bacteria;p__Bacillota;c__Clostridia;o__Lachnospirales;f__Lachnospiraceae;g__Blautia_A;s__Blautia_A faecis	GCF_020554845.1	95	Potential new species	YES	Same species
JCM 17039	Blautia glucerasea	Valid	Type	Bacteria; Bacillati; Bacillota; Clostridia; Lachnospirales; Lachnospiraceae	d__Bacteria;p__Bacillota;c__Clostridia;o__Lachnospirales;f__Lachnospiraceae;g__Blautia_A;s__Blautia_A sp026169535	GCA_026169535.1	95	Potential new species	YES	First genome of named species
JCM 17204	Blautia stercoris	Valid	Type	Bacteria; Bacillati; Bacillota; Clostridia; Lachnospirales; Lachnospiraceae	d__Bacteria;p__Bacillota;c__Clostridia;o__Lachnospirales;f__Lachnospiraceae;g__Blautia;s__Blautia stercoris	GCA_003481745.1	95	Potential new species	YES	Same species
JCM 18507	Fusicatenibacter saccharivorans	Valid	Type	Bacteria; Bacillati; Bacillota; Clostridia; Lachnospirales; Lachnospiraceae	d__Bacteria;p__Bacillota;c__Clostridia;o__Lachnospirales;f__Lachnospiraceae;g__Fusicatenibacter;s__Fusicatenibacter saccharivorans	GCF_027667425.1	95	Potential new species	YES	Same species
JCM 15917	Mediterraneibacter faecis	Valid	Type	Bacteria; Bacillati; Bacillota; Clostridia; Lachnospirales; Lachnospiraceae	d__Bacteria;p__Bacillota;c__Clostridia;o__Lachnospirales;f__Lachnospiraceae;g__Mediterraneibacter;s__Mediterraneibacter faecis	GCA_001312505.1	95	Potential new species	NO	Same species
JCM 13368	Mediterraneibacter glycyrrhizinilyticus	Valid	Type	Bacteria; Bacillati; Bacillota; Clostridia; Lachnospirales; Lachnospiraceae	d__Bacteria;p__Bacillota;c__Clostridia;o__Lachnospirales;f__Lachnospiraceae;g__Schaedlerella;s__Schaedlerella glycyrrhizinilytica_A	GCF_015560805.1	95	Potential new species	YES	Same species
JCM 13369	Mediterraneibacter glycyrrhizinilyticus	Valid	Non-type	Bacteria; Bacillati; Bacillota; Clostridia; Lachnospirales; Lachnospiraceae	d__Bacteria;p__Bacillota;c__Clostridia;o__Lachnospirales;f__Lachnospiraceae;g__Schaedlerella;s__Schaedlerella glycyrrhizinilytica_A	GCF_015560805.1	95	Potential new species	NO	Same species
JCM 17581	Roseburia faecis	Valid	Type	Bacteria; Bacillati; Bacillota; Clostridia; Lachnospirales; Lachnospiraceae	d__Bacteria;p__Bacillota;c__Clostridia;o__Lachnospirales;f__Lachnospiraceae;g__Agathobacter;s__Agathobacter faecis	GCF_001406815.1	95	Roseburia faecis	NO	Same species
JCM 11672	Alkaliphilus crotonatoxidans	Valid	Type	Bacteria; Bacillati; Bacillota; Clostridia; Peptostreptococcales; Natronincolaceae	d__Bacteria;p__Bacillota;c__Clostridia;o__Peptostreptococcales;f__Natronincolaceae;g__;s__	N/A	N/A	Potential new species	YES	Potentially different genus
JCM 13990	Tindallia texcoconensis	Valid	Type	Bacteria; Bacillati; Bacillota; Clostridia; Peptostreptococcales; Tindalliaceae	d__Bacteria;p__Bacillota;c__Clostridia;o__Peptostreptococcales;f__Tindalliaceae;g__Tindallia;s__	N/A	N/A	Potential new species	YES	First genome at species level
JCM 16816	Thermoanaerobacter brockii subsp. lactiethylicus	Valid	Type	Bacteria; Bacillati; Bacillota; Clostridia; Thermoanaerobacterales; Thermoanaerobacteraceae	d__Bacteria;p__Bacillota;c__Thermoanaerobacteria;o__Thermoanaerobacterales;f__Thermoanaerobacteraceae;g__Thermoanaerobacter;s__Thermoanaerobacter pseudethanolicus	GCF_000019085.1	95	Thermoanaerobacter pseudethanolicus	YES	Potentially different species
JCM 18270	Thermoanaerobacterium calidifontis	Invalid	Type	Bacteria; Bacillati; Bacillota; Clostridia; Thermoanaerobacterales; Thermoanaerobacteraceae	d__Bacteria;p__Bacillota;c__Thermoanaerobacteria;o__Thermoanaerobacterales;f__Thermoanaerobacteraceae;g__Thermoanaerobacterium;s__Thermoanaerobacterium sp002102475	GCF_002102475.1	95	Potential new species	YES	First genome of named species
JCM 15765	Desulfitobacterium aromaticivorans	Valid	Type	Bacteria; Bacillati; Bacillota; Desulfitobacteriia; Desulfitobacteriales; Desulfitobacteriaceae	d__Bacteria;p__Bacillota;c__Desulfitobacteriia;o__Desulfitobacteriales;f__Desulfitobacteriaceae;g__Paradesulfitobacterium;s__	N/A	N/A	Potential new species	YES	First genome at species level
JCM 17380	Desulfosporosinus burensis	Valid	Type	Bacteria; Bacillati; Bacillota; Desulfitobacteriia; Desulfitobacteriales; Desulfitobacteriaceae	d__Bacteria;p__Bacillota;c__Desulfitobacteriia;o__Desulfitobacteriales;f__Desulfitobacteriaceae;g__Desulfosporosinus;s__	N/A	N/A	Potential new species	YES	First genome at species level
JCM 31105	Desulfosporosinus nitroreducens	Valid	Type	Bacteria; Bacillati; Bacillota; Desulfitobacteriia; Desulfitobacteriales; Desulfitobacteriaceae	d__Bacteria;p__Bacillota;c__Desulfitobacteriia;o__Desulfitobacteriales;f__Desulfitobacteriaceae;g__Desulfosporosinus;s__Desulfosporosinus nitroreducens	GCF_030500275.1	95	Potential new species	YES	Same species
JCM 14036	Desulfotomaculum defluvii	Valid	Type	Bacteria; Bacillati; Bacillota; Desulfotomaculia; Desulfotomaculales; Desulfotomaculaceae	d__Bacteria;p__Bacillota;c__Desulfotomaculia;o__Desulfotomaculales;f__Desulfotomaculaceae;g__Desulfotomaculum;s__	N/A	N/A	Potential new species	YES	First genome at species level
JCM 39194	Desulfotomaculum varum	Valid	Type	Bacteria; Bacillati; Bacillota; Desulfotomaculia; Desulfotomaculales; Desulfotomaculaceae	d__Bacteria;p__Bacillota;c__Desulfotomaculia;o__Desulfotomaculales;f__Desulfotomaculaceae;g__Desulfotomaculum;s__	N/A	N/A	Potential new species	YES	First genome at species level
JCM 10604	Coprobacillus cateniformis	Valid	Type	Bacteria; Bacillati; Bacillota; Erysipelotrichia; Erysipelotrichales; Coprobacillaceae	d__Bacteria;p__Bacillota;c__Bacilli;o__Erysipelotrichales;f__Coprobacillaceae;g__Coprobacillus;s__Coprobacillus cateniformis	GCF_009767585.1	95	Potential new species	NO	Same species
JCM 30191	Breznakia pachnodae	Valid	Type	Bacteria; Bacillati; Bacillota; Erysipelotrichia; Erysipelotrichales; Erysipelotrichaceae	d__Bacteria;p__Bacillota;c__Bacilli;o__Erysipelotrichales;f__Erysipelotrichaceae;g__Breznakia;s__Breznakia pachnodae	GCF_030814225.1	95	Potential new species	NO	Same species
JCM 32836	Desulfosporomusa polytropa	Invalid	Type	Bacteria; Bacillati; Bacillota; Negativicutes; Selenomonadales; Sporomusaceae	d__Bacteria;p__Bacillota;c__Negativicutes;o__Sporomusales;f__Sporomusaceae;g__Sporomusa;s__Sporomusa sp017889675	GCA_017889675.1	95	Potential new species	YES	First genome of named species
JCM 13218	Sporomusa intestinalis	Invalid	Type	Bacteria; Bacillati; Bacillota; Negativicutes; Selenomonadales; Sporomusaceae	d__Bacteria;p__Bacillota;c__Negativicutes;o__Sporomusales;f__Sporomusaceae;g__Sporomusa;s__	N/A	N/A	Potential new species	YES	First genome at species level
JCM 31403	Megasphaera hexanoica	Valid	Type	Bacteria; Bacillati; Bacillota; Negativicutes; Veillonellales; Veillonellaceae	d__Bacteria;p__Bacillota;c__Negativicutes;o__Veillonellales;f__Megasphaeraceae;g__Caecibacter;s__Caecibacter massiliensis	GCA_900095875.1	95	Potential new species	YES	Potentially different species
JCM 13344	Syntrophomonas erecta subsp. sporosyntropha	Valid	Type	Bacteria; Bacillati; Bacillota; Syntrophomonadia; Syntrophomonadales; Syntrophomonadaceae	d__Bacteria;p__Bacillota;c__Syntrophomonadia;o__Syntrophomonadales;f__Syntrophomonadaceae;g__;s__	N/A	N/A	Potential new species	YES	Potentially different genus
JCM 17260	Thermosyntropha tengcongensis	Valid	Type	Bacteria; Bacillati; Bacillota; Syntrophomonadia; Syntrophomonadales; Syntrophomonadaceae	d__Bacteria;p__Bacillota;c__Syntrophomonadia;o__Syntrophomonadales;f__Syntrophomonadaceae;g__Thermosyntropha;s__	N/A	N/A	Potential new species	YES	First genome at species level
JCM 13210	Thermaerobacter litoralis	Valid	Type	Bacteria; Bacillati; Bacillota; Thermaerobacteria; Thermaerobacterales; Thermaerobacteraceae	d__Bacteria;p__Bacillota;c__Thermaerobacteria;o__Thermaerobacterales;f__Thermaerobacteraceae;g__Thermaerobacter;s__Thermaerobacter sp036564035	GCA_036564035.1	95	Potential new species	YES	First genome of named species
JCM 11223	Thermaerobacter nagasakiensis	Valid	Type	Bacteria; Bacillati; Bacillota; Thermaerobacteria; Thermaerobacterales; Thermaerobacteraceae	d__Bacteria;p__Bacillota;c__Thermaerobacteria;o__Thermaerobacterales;f__Thermaerobacteraceae;g__Thermaerobacter;s__Thermaerobacter subterraneus	GCF_000183545.2	95	Thermaerobacter subterraneus	YES	Potentially different species
JCM 17239	Anaerosalibacter bizertensis	Valid	Type	Bacteria; Bacillati; Bacillota; Tissierellia; Tissierellales; Sporanaerobacteraceae	d__Bacteria;p__Bacillota;c__Clostridia;o__Tissierellales;f__Sporanaerobacteraceae;g__Anaerosalibacter;s__	N/A	N/A	Potential new species	YES	First genome at species level
JCM 30480	Brassicibacter thermophilus	Valid	Type	Bacteria; Bacillati; Bacillota; Tissierellia; Tissierellales; Thermohalobacteraceae	d__Bacteria;p__Bacillota;c__Clostridia;o__Tissierellales;f__;g__;s__	N/A	N/A	Potential new species	YES	First genome of isolates at genus or higher level
JCM 16120	Caldilinea tarbellica	Valid	Type	Bacteria; Bacillati; Chloroflexota; Caldilineae; Caldilineales; Caldilineaceae	d__Bacteria;p__Chloroflexota;c__Anaerolineae;o__Caldilineales;f__Caldilineaceae;g__Caldilinea;s__Caldilinea sp937128415	GCF_937128415.1	95	Potential new species	YES	First genome of named species
JCM 9492	Aquifex pyrophilus	Valid	Type	Bacteria; Pseudomonadati; Aquificota; Aquificia; Aquificales; Aquificaceae	d__Bacteria;p__Aquificota;c__Aquificia;o__Aquificales;f__Aquificaceae;g__Aquifex;s__	N/A	N/A	Potential new species	YES	First genome at species level
JCM 13302	Hydrogenivirga okinawensis	Valid	Type	Bacteria; Pseudomonadati; Aquificota; Aquificia; Aquificales; Aquificaceae	d__Bacteria;p__Aquificota;c__Aquificia;o__Aquificales;f__Aquificaceae;g__Hydrogenivirga;s__	N/A	N/A	Potential new species	YES	First genome at species level
JCM 10560	Hydrogenobacter subterraneus	Valid	Type	Bacteria; Pseudomonadati; Aquificota; Aquificia; Aquificales; Aquificaceae	d__Bacteria;p__Aquificota;c__Aquificia;o__Aquificales;f__Aquificaceae;g__UBA11096;s__UBA11096 sp003534055	GCA_018771605.1	95	Potential new species	YES	Potentially different genus
JCM 8795	Hydrogenobaculum acidophilum	Valid	Type	Bacteria; Pseudomonadati; Aquificota; Aquificia; Aquificales; Aquificaceae	d__Bacteria;p__Aquificota;c__Aquificia;o__Aquificales;f__Aquificaceae;g__Hydrogenobaculum;s__	N/A	N/A	Potential new species	YES	First genome at species level
JCM 12825	Desulfurobacterium crinifex	Invalid	Type	Bacteria; Pseudomonadati; Aquificota; Aquificia; Desulfurobacteriales; Desulfurobacteriaceae	d__Bacteria;p__Aquificota;c__Aquificia;o__Desulfurobacteriales;f__Desulfurobacteriaceae;g__Desulfurobacterium;s__	N/A	N/A	Potential new species	YES	First genome at species level
JCM 12127	Desulfurobacterium pacificum	Valid	Type	Bacteria; Pseudomonadati; Aquificota; Aquificia; Desulfurobacteriales; Desulfurobacteriaceae	d__Bacteria;p__Aquificota;c__Aquificia;o__Desulfurobacteriales;f__Desulfurobacteriaceae;g__Desulfurobacterium_B;s__Desulfurobacterium_B pacificum	GCF_900182835.1	95	Potential new species	NO	Same species
JCM 11468	Thermovibrio ruber	Valid	Type	Bacteria; Pseudomonadati; Aquificota; Aquificia; Desulfurobacteriales; Desulfurobacteriaceae	d__Bacteria;p__Aquificota;c__Aquificia;o__Desulfurobacteriales;f__Desulfurobacteriaceae;g__Balnearium;s__	N/A	N/A	Potential new species	YES	First genome at species level
JCM 14244	Venenivibrio stagnispumantis	Valid	Type	Bacteria; Pseudomonadati; Aquificota; Aquificia; Hydrogenothermales; Hydrogenothermaceae	d__Bacteria;p__Aquificota;c__Aquificia;o__Aquificales;f__Hydrogenothermaceae;g__Venenivibrio;s__Venenivibrio stagnispumantis	GCF_900182795.1	95	Venenivibrio stagnispumantis	NO	Same species
JCM 10556	Bacteroides acidifaciens	Valid	Type	Bacteria; Pseudomonadati; Bacteroidota; Bacteroidia; Bacteroidales; Bacteroidaceae	d__Bacteria;p__Bacteroidota;c__Bacteroidia;o__Bacteroidales;f__Bacteroidaceae;g__Bacteroides;s__Bacteroides acidifaciens	GCF_024623065.1	95	Potential new species	NO	Same species
JCM 11017	Bacteroides fragilis	Valid	Non-type	Bacteria; Pseudomonadati; Bacteroidota; Bacteroidia; Bacteroidales; Bacteroidaceae	d__Bacteria;p__Bacteroidota;c__Bacteroidia;o__Bacteroidales;f__Bacteroidaceae;g__Bacteroides;s__Bacteroides fragilis	GCF_000025985.1	95	Potential new species	YES	Same species
JCM 12987	Bacteroides nordii	Valid	Type	Bacteria; Pseudomonadati; Bacteroidota; Bacteroidia; Bacteroidales; Bacteroidaceae	d__Bacteria;p__Bacteroidota;c__Bacteroidia;o__Bacteroidales;f__Bacteroidaceae;g__Bacteroides;s__Bacteroides nordii	GCA_000613465.1	95	Potential new species	NO	Same species
JCM 6292	Bacteroides pyogenes	Valid	Non-type	Bacteria; Pseudomonadati; Bacteroidota; Bacteroidia; Bacteroidales; Bacteroidaceae	d__Bacteria;p__Bacteroidota;c__Bacteroidia;o__Bacteroidales;f__Bacteroidaceae;g__Bacteroides;s__Bacteroides pyogenes	GCF_000428105.1	95	Potential new species	NO	Same species
JCM 6294	Bacteroides pyogenes	Valid	Type	Bacteria; Pseudomonadati; Bacteroidota; Bacteroidia; Bacteroidales; Bacteroidaceae	d__Bacteria;p__Bacteroidota;c__Bacteroidia;o__Bacteroidales;f__Bacteroidaceae;g__Bacteroides;s__Bacteroides pyogenes	GCF_000428105.1	95	Potential new species	NO	Same species
JCM 10003	Bacteroides pyogenes	Valid	Non-type	Bacteria; Pseudomonadati; Bacteroidota; Bacteroidia; Bacteroidales; Bacteroidaceae	d__Bacteria;p__Bacteroidota;c__Bacteroidia;o__Bacteroidales;f__Bacteroidaceae;g__Bacteroides;s__Bacteroides pyogenes_A	GCF_014196225.1	95.28	Potential new species	NO	Same species
JCM 10512	Bacteroides reticulotermitis	Valid	Type	Bacteria; Pseudomonadati; Bacteroidota; Bacteroidia; Bacteroidales; Bacteroidaceae	d__Bacteria;p__Bacteroidota;c__Bacteroidia;o__Bacteroidales;f__Bacteroidaceae;g__Bacteroides;s__Bacteroides reticulotermitis	GCF_000517545.1	95	Potential new species	NO	Same species
JCM 16496	Bacteroides rodentium	Valid	Type	Bacteria; Pseudomonadati; Bacteroidota; Bacteroidia; Bacteroidales; Bacteroidaceae	d__Bacteria;p__Bacteroidota;c__Bacteroidia;o__Bacteroidales;f__Bacteroidaceae;g__Bacteroides;s__Bacteroides rodentium	GCF_000614125.1	95	Potential new species	NO	Same species
JCM 15092	Phocaeicola paurosaccharolyticus	Valid	Type	Bacteria; Pseudomonadati; Bacteroidota; Bacteroidia; Bacteroidales; Bacteroidaceae	d__Bacteria;p__Bacteroidota;c__Bacteroidia;o__Bacteroidales;f__Bacteroidaceae;g__Phocaeicola;s__Phocaeicola paurosaccharolyticus	GCF_000613805.1	95	Phocaeicola paurosaccharolyticus	NO	Same species
JCM 17136	Phocaeicola sartorii	Valid	Type	Bacteria; Pseudomonadati; Bacteroidota; Bacteroidia; Bacteroidales; Bacteroidaceae	d__Bacteria;p__Bacteroidota;c__Bacteroidia;o__Bacteroidales;f__Bacteroidaceae;g__Phocaeicola;s__Phocaeicola sartorii	GCF_024622025.1	95	Phocaeicola sartorii	NO	Same species
JCM 30204	Dysgonomonas termitidis	Valid	Type	Bacteria; Pseudomonadati; Bacteroidota; Bacteroidia; Bacteroidales; Dysgonomonadaceae	d__Bacteria;p__Bacteroidota;c__Bacteroidia;o__Bacteroidales;f__Dysgonomonadaceae;g__Dysgonomonas;s__	N/A	N/A	Potential new species	YES	First genome at species level
JCM 12565	Petrimonas sulfuriphila	Valid	Type	Bacteria; Pseudomonadati; Bacteroidota; Bacteroidia; Bacteroidales; Dysgonomonadaceae	d__Bacteria;p__Bacteroidota;c__Bacteroidia;o__Bacteroidales;f__Dysgonomonadaceae;g__Petrimonas;s__Petrimonas sulfuriphila	GCA_038561985.1	95	Petrimonas sulfuriphila	YES	Same species
JCM 15907	Porphyromonas gingivicanis	Valid	Type	Bacteria; Pseudomonadati; Bacteroidota; Bacteroidia; Bacteroidales; Porphyromonadaceae	d__Bacteria;p__Bacteroidota;c__Bacteroidia;o__Bacteroidales;f__Porphyromonadaceae;g__Porphyromonas;s__Porphyromonas gingivicanis	GCF_000614585.1	95	Porphyromonas gingivicanis	NO	Same species
JCM 17484	Hoylesella saccharolytica	Valid	Type	Bacteria; Pseudomonadati; Bacteroidota; Bacteroidia; Bacteroidales; Prevotellaceae	d__Bacteria;p__Bacteroidota;c__Bacteroidia;o__Bacteroidales;f__Bacteroidaceae;g__Prevotella;s__Prevotella saccharolytica	GCF_000614205.1	95	Prevotella saccharolytica	NO	Same species
JCM 15640	Hoylesella timonensis	Valid	Type	Bacteria; Pseudomonadati; Bacteroidota; Bacteroidia; Bacteroidales; Prevotellaceae	d__Bacteria;p__Bacteroidota;c__Bacteroidia;o__Bacteroidales;f__Bacteroidaceae;g__Prevotella;s__Prevotella timonensis	GCF_000455445.1	95	Prevotella timonensis	NO	Same species
JCM 15754	Prevotella aurantiaca	Valid	Type	Bacteria; Pseudomonadati; Bacteroidota; Bacteroidia; Bacteroidales; Prevotellaceae	d__Bacteria;p__Bacteroidota;c__Bacteroidia;o__Bacteroidales;f__Bacteroidaceae;g__Prevotella;s__Prevotella aurantiaca	GCF_000614025.1	95	Prevotella aurantiaca	NO	Same species
JCM 15908	Prevotella dentasini	Valid	Type	Bacteria; Pseudomonadati; Bacteroidota; Bacteroidia; Bacteroidales; Prevotellaceae	d__Bacteria;p__Bacteroidota;c__Bacteroidia;o__Bacteroidales;f__Bacteroidaceae;g__Prevotella;s__Prevotella dentasini	GCF_000614065.1	95	Prevotella dentasini	NO	Same species
JCM 13449	Prevotella denticola	Valid	Type	Bacteria; Pseudomonadati; Bacteroidota; Bacteroidia; Bacteroidales; Prevotellaceae	d__Bacteria;p__Bacteroidota;c__Bacteroidia;o__Bacteroidales;f__Bacteroidaceae;g__Prevotella;s__Prevotella denticola	GCF_900454835.1	95	Prevotella denticola	NO	Same species
JCM 15124	Prevotella falsenii	Valid	Type	Bacteria; Pseudomonadati; Bacteroidota; Bacteroidia; Bacteroidales; Prevotellaceae	d__Bacteria;p__Bacteroidota;c__Bacteroidia;o__Bacteroidales;f__Bacteroidaceae;g__Prevotella;s__Prevotella falsenii	GCF_000613945.1	95	Prevotella falsenii	NO	Same species
JCM 17724	Prevotella fusca	Valid	Type	Bacteria; Pseudomonadati; Bacteroidota; Bacteroidia; Bacteroidales; Prevotellaceae	d__Bacteria;p__Bacteroidota;c__Bacteroidia;o__Bacteroidales;f__Bacteroidaceae;g__Prevotella;s__Prevotella fusca	GCF_001262015.1	95	Prevotella fusca	NO	Same species
JCM 15637	Prevotella histicola	Valid	Type	Bacteria; Pseudomonadati; Bacteroidota; Bacteroidia; Bacteroidales; Prevotellaceae	d__Bacteria;p__Bacteroidota;c__Bacteroidia;o__Bacteroidales;f__Bacteroidaceae;g__Prevotella;s__Prevotella histicola	GCA_000613925.1	95	Prevotella histicola	NO	Same species
JCM 17725	Prevotella scopos	Valid	Type	Bacteria; Pseudomonadati; Bacteroidota; Bacteroidia; Bacteroidales; Prevotellaceae	d__Bacteria;p__Bacteroidota;c__Bacteroidia;o__Bacteroidales;f__Bacteroidaceae;g__Prevotella;s__Prevotella scopos	GCF_018127785.1	95	Prevotella scopos	NO	Same species
JCM 15579	Marinifilum fragile	Valid	Type	Bacteria; Pseudomonadati; Bacteroidota; Bacteroidia; Marinilabiliales; Marinifilaceae	d__Bacteria;p__Bacteroidota;c__Bacteroidia;o__Bacteroidales;f__Marinifilaceae;g__Marinifilum;s__Marinifilum fragile	GCF_001310955.1	95	Potential new species	NO	Same species
JCM 15548	Geofilum rubicundum	Valid	Type	Bacteria; Pseudomonadati; Bacteroidota; Bacteroidia; Marinilabiliales; Marinilabiliaceae	d__Bacteria;p__Bacteroidota;c__Bacteroidia;o__Bacteroidales;f__Marinilabiliaceae;g__Geofilum;s__Geofilum rubicundum	GCF_000974365.1	95	Potential new species	NO	Same species
JCM 15069	Lutaonella thermophila	Valid	Type	Bacteria; Pseudomonadati; Bacteroidota; Flavobacteriia; Flavobacteriales; Flavobacteriaceae	d__Bacteria;p__Bacteroidota;c__Bacteroidia;o__Flavobacteriales;f__Flavobacteriaceae;g__;s__	N/A	N/A	Potential new species	YES	First genome of isolates at genus or higher level
JCM 15747	Thiofractor thiocaminus	Invalid	Type	Bacteria; Pseudomonadati; Campylobacterota; Epsilonproteobacteria; Campylobacterales	d__Bacteria;p__Campylobacterota;c__Campylobacteria;o__Campylobacterales;f__JALSKU01;g__JALSKU01;s__	N/A	N/A	Potential new species	YES	First genome of isolates at genus or higher level
JCM 2013	Campylobacter jejuni subsp. jejuni	Valid	Non-type	Bacteria; Pseudomonadati; Campylobacterota; Epsilonproteobacteria; Campylobacterales; Campylobacteraceae	d__Bacteria;p__Campylobacterota;c__Campylobacteria;o__Campylobacterales;f__Campylobacteraceae;g__Campylobacter_D;s__Campylobacter_D jejuni	GCF_001457695.1	95	Potential new species	YES	Same species
JCM 12095	Helicobacter pylori	Valid	Non-type	Bacteria; Pseudomonadati; Campylobacterota; Epsilonproteobacteria; Campylobacterales; Helicobacteraceae	d__Bacteria;p__Campylobacterota;c__Campylobacteria;o__Campylobacterales;f__Helicobacteraceae;g__Helicobacter;s__Helicobacter pylori	GCF_900478295.1	95.42	Potential new species	YES	Same species
JCM 19824	Sulfurovum aggregans	Valid	Type	Bacteria; Pseudomonadati; Campylobacterota; Epsilonproteobacteria; Campylobacterales; Sulfurovaceae	d__Bacteria;p__Campylobacterota;c__Campylobacteria;o__Campylobacterales;f__Sulfurovaceae;g__Sulfurovum;s__	N/A	N/A	Potential new species	YES	First genome at species level
JCM 11957	Caminibacter profundus	Valid	Type	Bacteria; Pseudomonadati; Campylobacterota; Epsilonproteobacteria; Nautiliales; Nautiliaceae	d__Bacteria;p__Campylobacterota;c__Campylobacteria;o__Nautiliales;f__Nautiliaceae;g__Caminibacter;s__	N/A	N/A	Potential new species	YES	First genome at species level
JCM 15390	Nautilia abyssi	Valid	Type	Bacteria; Pseudomonadati; Campylobacterota; Epsilonproteobacteria; Nautiliales; Nautiliaceae	d__Bacteria;p__Campylobacterota;c__Campylobacteria;o__Nautiliales;f__Nautiliaceae;g__Nautilia;s__Nautilia profundicola_A	GCF_004006315.1	95	Potential new species	YES	First genome of named species
JCM 15786	Nautilia lithotrophica	Valid	Type	Bacteria; Pseudomonadati; Campylobacterota; Epsilonproteobacteria; Nautiliales; Nautiliaceae	d__Bacteria;p__Campylobacterota;c__Campylobacteria;o__Nautiliales;f__Nautiliaceae;g__Nautilia;s__	N/A	N/A	Potential new species	YES	First genome at species level
JCM 12457	Thioreductor micantisoli	Valid	Type	Bacteria; Pseudomonadati; Campylobacterota; Epsilonproteobacteria; Nautiliales; Thioreductoraceae	d__Bacteria;p__Campylobacterota;c__Campylobacteria;o__Nautiliales;f__JAADDX01;g__JAUUDM01;s__	N/A	N/A	Potential new species	YES	First genome of isolates at genus or higher level
JCM 15827	Desulfurispirillum alkaliphilum	Valid	Type	Bacteria; Pseudomonadati; Chrysiogenota; Chrysiogenia; Chrysiogenales; Chrysiogenaceae	d__Bacteria;p__Chrysiogenota;c__Chrysiogenetes;o__Chrysiogenales;f__Chrysiogenaceae;g__Desulfurispirillum;s__Desulfurispirillum indicum	GCF_000177635.2	95	Potential new species	YES	Potentially different species
JCM 17152	Oligosphaera ethanolica	Valid	Type	Bacteria; Pseudomonadati; Lentisphaerota; Oligosphaeria; Oligosphaerales; Oligosphaeraceae	d__Bacteria;p__Verrucomicrobiota;c__Lentisphaeria;o__Oligosphaerales;f__Oligosphaeraceae;g__Oligosphaera;s__Oligosphaera ethanolica	GCF_030814695.1	95	Oligosphaera ethanolica	NO	Same species
JCM 13213	Thermodesulfovibrio aggregans	Valid	Type	Bacteria; Pseudomonadati; Nitrospirota; Thermodesulfovibrionia; Thermodesulfovibrionales; Thermodesulfovibrionaceae	d__Bacteria;p__Nitrospirota;c__Thermodesulfovibrionia;o__Thermodesulfovibrionales;f__Thermodesulfovibrionaceae;g__Thermodesulfovibrio;s__Thermodesulfovibrio aggregans	GCF_001514535.1	95	Thermodesulfovibrio aggregans	NO	Same species
JCM 13991	Thermodesulfovibrio hydrogeniphilus	Valid	Type	Bacteria; Pseudomonadati; Nitrospirota; Thermodesulfovibrionia; Thermodesulfovibrionales; Thermodesulfovibrionaceae	d__Bacteria;p__Nitrospirota;c__Thermodesulfovibrionia;o__Thermodesulfovibrionales;f__Thermodesulfovibrionaceae;g__Thermodesulfovibrio;s__Thermodesulfovibrio sp041640755	GCA_041640755.1	95	Thermodesulfovibrio hydrogeniphilus	YES	Same species
JCM 17478	Thermopirellula anaerolimosa	Invalid	Type	Bacteria; Pseudomonadati; Planctomycetota; Planctomycetia	d__Bacteria;p__Planctomycetota;c__Planctomycetia;o__Pirellulales;f__Thermoguttaceae;g__Thermogutta;s__	N/A	N/A	Potential new species	YES	First genome at species level
JCM 19991	Thermogutta hypogea	Valid	Type	Bacteria; Pseudomonadati; Planctomycetota; Planctomycetia; Pirellulales; Thermoguttaceae	d__Bacteria;p__Planctomycetota;c__Planctomycetia;o__Pirellulales;f__Thermoguttaceae;g__Thermogutta;s__	N/A	N/A	Potential new species	YES	First genome at species level
JCM 19992	Thermostilla marina	Valid	Type	Bacteria; Pseudomonadati; Planctomycetota; Planctomycetia; Pirellulales; Thermoguttaceae	d__Bacteria;p__Planctomycetota;c__Planctomycetia;o__Pirellulales;f__Thermoguttaceae;g__;s__	N/A	N/A	Potential new species	YES	First genome of isolates at genus or higher level
JCM 25146	Acetobacter okinawensis	Valid	Type	Bacteria; Pseudomonadati; Pseudomonadota; Alphaproteobacteria; Acetobacterales; Acetobacteraceae	d__Bacteria;p__Pseudomonadota;c__Alphaproteobacteria;o__Acetobacterales;f__Acetobacteraceae;g__Acetobacter;s__Acetobacter okinawensis	GCF_000613865.1	95	Potential new species	NO	Same species
JCM 25330	Acetobacter persici	Valid	Type	Bacteria; Pseudomonadati; Pseudomonadota; Alphaproteobacteria; Acetobacterales; Acetobacteraceae	d__Bacteria;p__Pseudomonadota;c__Alphaproteobacteria;o__Acetobacterales;f__Acetobacteraceae;g__Acetobacter;s__Acetobacter persici	GCF_000613905.1	95	Potential new species	NO	Same species
JCM 15831	Asaia astilbis	Valid	Type	Bacteria; Pseudomonadati; Pseudomonadota; Alphaproteobacteria; Acetobacterales; Acetobacteraceae	d__Bacteria;p__Pseudomonadota;c__Alphaproteobacteria;o__Acetobacterales;f__Acetobacteraceae;g__Asaia;s__Asaia astilbis	GCF_000613845.1	95	Potential new species	NO	Same species
JCM 25414	Asaia platycodi	Valid	Type	Bacteria; Pseudomonadati; Pseudomonadota; Alphaproteobacteria; Acetobacterales; Acetobacteraceae	d__Bacteria;p__Pseudomonadota;c__Alphaproteobacteria;o__Acetobacterales;f__Acetobacteraceae;g__Asaia;s__Asaia platycodi	GCF_000614545.1	95	Potential new species	NO	Same species
JCM 25354	Asaia prunellae	Valid	Type	Bacteria; Pseudomonadati; Pseudomonadota; Alphaproteobacteria; Acetobacterales; Acetobacteraceae	d__Bacteria;p__Pseudomonadota;c__Alphaproteobacteria;o__Acetobacterales;f__Acetobacteraceae;g__Asaia;s__Asaia prunellae	GCF_000613885.1	95	Potential new species	NO	Same species
JCM 21176	Gluconobacter cerinus	Valid	Non-type	Bacteria; Pseudomonadati; Pseudomonadota; Alphaproteobacteria; Acetobacterales; Acetobacteraceae	d__Bacteria;p__Pseudomonadota;c__Alphaproteobacteria;o__Acetobacterales;f__Acetobacteraceae;g__Gluconobacter_A;s__Gluconobacter_A japonicus	GCF_002723975.1	95	Potential new species	YES	Known species
JCM 25156	Komagataeibacter kakiaceti	Valid	Type	Bacteria; Pseudomonadati; Pseudomonadota; Alphaproteobacteria; Acetobacterales; Acetobacteraceae	d__Bacteria;p__Pseudomonadota;c__Alphaproteobacteria;o__Acetobacterales;f__Acetobacteraceae;g__Komagataeibacter;s__	N/A	N/A	Potential new species	NO	Same species
JCM 16408	Methylobacterium phyllosphaerae	Valid	Type	Bacteria; Pseudomonadati; Pseudomonadota; Alphaproteobacteria; Hyphomicrobiales; Methylobacteriaceae	d__Bacteria;p__Pseudomonadota;c__Alphaproteobacteria;o__Rhizobiales;f__Beijerinckiaceae;g__Methylobacterium;s__Methylobacterium fujisawaense	GCF_014138435.1	95	Potential new species	NO	Potentially different species
JCM 2811	Methylorubrum rhodinum	Valid	Type	Bacteria; Pseudomonadati; Pseudomonadota; Alphaproteobacteria; Hyphomicrobiales; Methylobacteriaceae	d__Bacteria;p__Pseudomonadota;c__Alphaproteobacteria;o__Rhizobiales;f__Beijerinckiaceae;g__Methylobacterium;s__Methylobacterium rhodinum	GCF_014199935.1	95	Potential new species	NO	Same species
JCM 10893	Methylorubrum thiocyanatum	Valid	Type	Bacteria; Pseudomonadati; Pseudomonadota; Alphaproteobacteria; Hyphomicrobiales; Methylobacteriaceae	d__Bacteria;p__Pseudomonadota;c__Alphaproteobacteria;o__Rhizobiales;f__Beijerinckiaceae;g__Methylobacterium;s__Methylobacterium thiocyanatum	GCF_014138645.1	95	Potential new species	NO	Same species
JCM 18382	Bradyrhizobium sp.	N.A.	Non-type	Bacteria; Pseudomonadati; Pseudomonadota; Alphaproteobacteria; Hyphomicrobiales; Nitrobacteraceae	d__Bacteria;p__Pseudomonadota;c__Alphaproteobacteria;o__Rhizobiales;f__Xanthobacteraceae;g__Bradyrhizobium;s__Bradyrhizobium sp003020075	GCA_016839165.1	95	Potential new species	YES	Potentially novel species
JCM 21793	Nitratireductor aquibiodomus	Valid	Type	Bacteria; Pseudomonadati; Pseudomonadota; Alphaproteobacteria; Hyphomicrobiales; Phyllobacteriaceae	d__Bacteria;p__Pseudomonadota;c__Alphaproteobacteria;o__Rhizobiales;f__Rhizobiaceae;g__Nitratireductor;s__Nitratireductor aquibiodomus	GCF_000615975.1	95	Potential new species	NO	Same species
JCM 30711	Micropepsis pineolensis	Valid	Type	Bacteria; Pseudomonadati; Pseudomonadota; Alphaproteobacteria; Micropepsales; Micropepsaceae	d__Bacteria;p__Pseudomonadota;c__Alphaproteobacteria;o__Micropepsales;f__Micropepsaceae;g__Rhizomicrobium;s__	N/A	N/A	Potential new species	YES	First genome at species level
JCM 14636	Piezobacter thermophilus	Invalid	Type	Bacteria; Pseudomonadati; Pseudomonadota; Alphaproteobacteria; Rhodobacterales; Paracoccaceae	d__Bacteria;p__Pseudomonadota;c__Alphaproteobacteria;o__Rhodobacterales;f__Rhodobacteraceae;g__Jhaorihella;s__	N/A	N/A	Potential new species	YES	First genome at species level
JCM 21060	Rhodocista centenaria	Valid	Type	Bacteria; Pseudomonadati; Pseudomonadota; Alphaproteobacteria; Rhodospirillales; Azospirillaceae	d__Bacteria;p__Pseudomonadota;c__Alphaproteobacteria;o__Azospirillales;f__Azospirillaceae;g__Rhodospirillum_A;s__Rhodospirillum_A centenum	GCF_000016185.1	95	Rhodocista centenaria	YES	Same species
JCM 19705	Fodinicurvata halophila	Valid	Type	Bacteria; Pseudomonadati; Pseudomonadota; Alphaproteobacteria; Rhodospirillales; Fodinicurvataceae	d__Bacteria;p__Pseudomonadota;c__Alphaproteobacteria;o__Kiloniellales;f__DSM-21159;g__Fodinicurvata;s__	N/A	N/A	Potential new species	NO	First genome at species level
JCM 17960	Magnetospira thiophila	Valid	Type	Bacteria; Pseudomonadati; Pseudomonadota; Alphaproteobacteria; Rhodospirillales; Magnetospiraceae	d__Bacteria;p__Pseudomonadota;c__Alphaproteobacteria;o__Rhodospirillales;f__Magnetospiraceae;g__Magnetospira;s__	N/A	N/A	Potential new species	YES	First genome at species level
JCM 23214	Sneathiella glossodoripedis	Valid	Type	Bacteria; Pseudomonadati; Pseudomonadota; Alphaproteobacteria; Sneathiellales; Sneathiellaceae	d__Bacteria;p__Pseudomonadota;c__Alphaproteobacteria;o__Sneathiellales;f__Sneathiellaceae;g__Sneathiella;s__Sneathiella glossodoripedis	GCF_000616095.1	95	Sneathiella glossodoripedis	NO	Same species
JCM 12421	Thiobacter subterraneus	Valid	Type	Bacteria; Pseudomonadati; Pseudomonadota; Betaproteobacteria; Burkholderiales	d__Bacteria;p__Pseudomonadota;c__Gammaproteobacteria;o__Burkholderiales;f__Thiobacteraceae;g__Thiobacter;s__	N/A	N/A	Potential new species	YES	First genome at species level
JCM 16107	Thiomonas islandica	Valid	Type	Bacteria; Pseudomonadati; Pseudomonadota; Betaproteobacteria; Burkholderiales	d__Bacteria;p__Pseudomonadota;c__Gammaproteobacteria;o__Burkholderiales;f__Burkholderiaceae;g__Thiomonas;s__	N/A	N/A	Potential new species	YES	First genome at species level
JCM 18799	Achromobacter sp.	N.A.	Non-type	Bacteria; Pseudomonadati; Pseudomonadota; Betaproteobacteria; Burkholderiales; Alcaligenaceae	d__Bacteria;p__Pseudomonadota;c__Gammaproteobacteria;o__Burkholderiales;f__Burkholderiaceae;g__Achromobacter;s__Achromobacter bronchisepticus_A	GCF_014490035.1	95	Potential new species	YES	Known species
JCM 9787	Achromobacter xylosoxidans	Valid	Non-type	Bacteria; Pseudomonadati; Pseudomonadota; Betaproteobacteria; Burkholderiales; Alcaligenaceae	d__Bacteria;p__Pseudomonadota;c__Gammaproteobacteria;o__Burkholderiales;f__Burkholderiaceae;g__Achromobacter;s__Achromobacter denitrificans	GCF_001571365.1	95	Potential new species	YES	Known species
JCM 20666	Alcaligenes faecalis	Valid	Non-type	Bacteria; Pseudomonadati; Pseudomonadota; Betaproteobacteria; Burkholderiales; Alcaligenaceae	d__Bacteria;p__Pseudomonadota;c__Gammaproteobacteria;o__Burkholderiales;f__Burkholderiaceae;g__Alcaligenes;s__Alcaligenes phenolicus	GCF_000429385.1	95	Potential new species	YES	Same species
JCM 10599	Paraburkholderia kururiensis	Valid	Type	Bacteria; Pseudomonadati; Pseudomonadota; Betaproteobacteria; Burkholderiales; Burkholderiaceae	d__Bacteria;p__Pseudomonadota;c__Gammaproteobacteria;o__Burkholderiales;f__Burkholderiaceae;g__Paraburkholderia;s__Paraburkholderia kururiensis	GCF_003986935.1	95	Paraburkholderia kururiensis	NO	Same species
JCM 19000	Silvimonas sp.	N.A.	Non-type	Bacteria; Pseudomonadati; Pseudomonadota; Betaproteobacteria; Neisseriales; Chitinibacteraceae	d__Bacteria;p__Pseudomonadota;c__Gammaproteobacteria;o__Burkholderiales;f__Chitinibacteraceae;g__Amantichitinum;s__	N/A	N/A	Potential new species	YES	Potentially novel species
JCM 12992	Neisseria mucosa	Valid	Type	Bacteria; Pseudomonadati; Pseudomonadota; Betaproteobacteria; Neisseriales; Neisseriaceae	d__Bacteria;p__Pseudomonadota;c__Gammaproteobacteria;o__Burkholderiales;f__Neisseriaceae;g__Neisseria;s__Neisseria mucosa	GCA_003028315.1	96.93	Potential new species	YES	Same species
JCM 2850	Methylobacillus glycogenes	Valid	Type	Bacteria; Pseudomonadati; Pseudomonadota; Betaproteobacteria; Nitrosomonadales; Methylophilaceae	d__Bacteria;p__Pseudomonadota;c__Gammaproteobacteria;o__Burkholderiales;f__Methylophilaceae;g__Methylobacillus;s__Methylobacillus glycogenes	GCF_000617925.1	95	Potential new species	NO	Same species
JCM 15047	Thiobacillus thiophilus	Valid	Type	Bacteria; Pseudomonadati; Pseudomonadota; Betaproteobacteria; Nitrosomonadales; Thiobacillaceae	d__Bacteria;p__Pseudomonadota;c__Gammaproteobacteria;o__Burkholderiales;f__Thiobacillaceae;g__Thiobacillus;s__Thiobacillus sp035530575	GCA_035530575.1	95	Potential new species	YES	First genome of named species
JCM 12309	Thauera sp.	N.A.	Non-type	Bacteria; Pseudomonadati; Pseudomonadota; Betaproteobacteria; Rhodocyclales; Zoogloeaceae	d__Bacteria;p__Pseudomonadota;c__Gammaproteobacteria;o__Burkholderiales;f__Rhodocyclaceae;g__Thauera;s__Thauera aminoaromatica	GCF_000310185.1	95	Thauera aminoaromatica	YES	Known species
JCM 14267	Alkalimonas collagenimarina	Valid	Type	Bacteria; Pseudomonadati; Pseudomonadota; Gammaproteobacteria	d__Bacteria;p__Pseudomonadota;c__Gammaproteobacteria;o__Enterobacterales;f__Alteromonadaceae;g__Alkalimonas;s__Alkalimonas collagenimarina	GCF_030717845.1	95	Potential new species	NO	Same species
JCM 14758	Shewanella algae	Valid	Non-type	Bacteria; Pseudomonadati; Pseudomonadota; Gammaproteobacteria; Alteromonadales; Shewanellaceae	d__Bacteria;p__Pseudomonadota;c__Gammaproteobacteria;o__Enterobacterales;f__Shewanellaceae;g__Shewanella;s__Shewanella algae	GCF_009183365.2	95	Shewanella algae	NO	Same species
JCM 15074	Shewanella marina	Valid	Type	Bacteria; Pseudomonadati; Pseudomonadota; Gammaproteobacteria; Alteromonadales; Shewanellaceae	d__Bacteria;p__Pseudomonadota;c__Gammaproteobacteria;o__Enterobacterales;f__Shewanellaceae;g__Shewanella;s__Shewanella marina	GCF_000614975.1	95	Shewanella marina	NO	Same species
JCM 17961	Endothiovibrio diazotrophicus	Valid	Type	Bacteria; Pseudomonadati; Pseudomonadota; Gammaproteobacteria; Chromatiales; Thioalkalispiraceae	d__Bacteria;p__Pseudomonadota;c__Gammaproteobacteria;o__JACKNK01;f__JACKNK01;g__;s__	N/A	N/A	Potential new species	YES	First genome of isolates at genus or higher level
JCM 14586	Thioprofundum lithotrophicum	Valid	Type	Bacteria; Pseudomonadati; Pseudomonadota; Gammaproteobacteria; Chromatiales; Thioprofundaceae	d__Bacteria;p__Pseudomonadota;c__Gammaproteobacteria;o__UBA6429;f__Thiohalophilaceae;g__JALSSV01;s__	N/A	N/A	Potential new species	YES	First genome of isolates at genus or higher level
JCM 20135	Escherichia coli	Valid	Non-type	Bacteria; Pseudomonadati; Pseudomonadota; Gammaproteobacteria; Enterobacterales; Enterobacteriaceae	d__Bacteria;p__Pseudomonadota;c__Gammaproteobacteria;o__Enterobacterales;f__Enterobacteriaceae;g__Escherichia;s__Escherichia coli	GCF_003697165.2	95	Potential new species	YES	Same species
JCM 20051	Raoultella sp.	N.A.	Non-type	Bacteria; Pseudomonadati; Pseudomonadota; Gammaproteobacteria; Enterobacterales; Enterobacteriaceae	d__Bacteria;p__Pseudomonadota;c__Gammaproteobacteria;o__Enterobacterales;f__Enterobacteriaceae;g__Klebsiella;s__Klebsiella ornithinolytica	GCF_001598295.1	95.34	Potential new species	YES	Known species
JCM 6977	Salmonella enterica subsp. enterica	Valid	Non-type	Bacteria; Pseudomonadati; Pseudomonadota; Gammaproteobacteria; Enterobacterales; Enterobacteriaceae	d__Bacteria;p__Pseudomonadota;c__Gammaproteobacteria;o__Enterobacterales;f__Enterobacteriaceae;g__Salmonella;s__Salmonella enterica	GCF_000006945.2	95	Salmonella typhi	YES	Same species
JCM 19379	Methyloparacoccus murrellii	Valid	Type	Bacteria; Pseudomonadati; Pseudomonadota; Gammaproteobacteria; Methylococcales; Methylococcaceae	d__Bacteria;p__Pseudomonadota;c__Gammaproteobacteria;o__Methylococcales;f__Methylococcaceae;g__UBA6136;s__	N/A	N/A	Potential new species	YES	First genome of isolates at genus or higher level
JCM 14076	Methylosoma difficile	Valid	Type	Bacteria; Pseudomonadati; Pseudomonadota; Gammaproteobacteria; Methylococcales; Methylococcaceae	d__Bacteria;p__Pseudomonadota;c__Gammaproteobacteria;o__Methylococcales;f__Methylomonadaceae;g__Methylovulum;s__	N/A	N/A	Potential new species	YES	First genome at species level
JCM 13664	Methylothermus subterraneus	Valid	Type	Bacteria; Pseudomonadati; Pseudomonadota; Gammaproteobacteria; Methylococcales; Methylothermaceae	d__Bacteria;p__Pseudomonadota;c__Gammaproteobacteria;o__Methylococcales;f__Methylothermaceae;g__Methylohalobius;s__	N/A	N/A	Potential new species	YES	First genome at species level
JCM 18900	Psychrobacter sp.	N.A.	Non-type	Bacteria; Pseudomonadati; Pseudomonadota; Gammaproteobacteria; Moraxellales; Moraxellaceae	d__Bacteria;p__Pseudomonadota;c__Gammaproteobacteria;o__Pseudomonadales;f__Moraxellaceae;g__Psychrobacter;s__Psychrobacter sp000586415	GCF_904846625.1	95	Potential new species	NO	Potentially novel species
JCM 18901	Psychrobacter sp.	N.A.	Non-type	Bacteria; Pseudomonadati; Pseudomonadota; Gammaproteobacteria; Moraxellales; Moraxellaceae	d__Bacteria;p__Pseudomonadota;c__Gammaproteobacteria;o__Pseudomonadales;f__Moraxellaceae;g__Psychrobacter;s__Psychrobacter sp000586435	GCF_000586435.1	95	Potential new species	NO	Potentially novel species
JCM 18902	Psychrobacter sp.	N.A.	Non-type	Bacteria; Pseudomonadati; Pseudomonadota; Gammaproteobacteria; Moraxellales; Moraxellaceae	d__Bacteria;p__Pseudomonadota;c__Gammaproteobacteria;o__Pseudomonadales;f__Moraxellaceae;g__Psychrobacter;s__Psychrobacter sp000586455	GCF_904846615.1	96.59	Potential new species	NO	Potentially novel species
JCM 18903	Psychrobacter sp.	N.A.	Non-type	Bacteria; Pseudomonadati; Pseudomonadota; Gammaproteobacteria; Moraxellales; Moraxellaceae	d__Bacteria;p__Pseudomonadota;c__Gammaproteobacteria;o__Pseudomonadales;f__Moraxellaceae;g__Psychrobacter;s__Psychrobacter sp000586475	GCF_000586475.1	96.45	Potential new species	NO	Potentially novel species
JCM 16084	Halomonas beimenensis	Valid	Type	Bacteria; Pseudomonadati; Pseudomonadota; Gammaproteobacteria; Oceanospirillales; Halomonadaceae	d__Bacteria;p__Pseudomonadota;c__Gammaproteobacteria;o__Pseudomonadales;f__Halomonadaceae;g__Halomonas;s__Halomonas beimenensis	GCF_039522625.1	95	Potential new species	NO	Same species
JCM 16914	Halomonas cibimaris	Valid	Type	Bacteria; Pseudomonadati; Pseudomonadota; Gammaproteobacteria; Oceanospirillales; Halomonadaceae	d__Bacteria;p__Pseudomonadota;c__Gammaproteobacteria;o__Pseudomonadales;f__Halomonadaceae;g__Vreelandella;s__Vreelandella cibimaris	GCF_039537045.1	95	Potential new species	NO	Same species
JCM 30151	Halomonas garicola	Valid	Type	Bacteria; Pseudomonadati; Pseudomonadota; Gammaproteobacteria; Oceanospirillales; Halomonadaceae	d__Bacteria;p__Pseudomonadota;c__Gammaproteobacteria;o__Pseudomonadales;f__Halomonadaceae;g__Vreelandella;s__Vreelandella garicola	GCF_031935715.1	95	Potential new species	NO	Same species
JCM 14803	Halomonas salifodinae	Valid	Type	Bacteria; Pseudomonadati; Pseudomonadota; Gammaproteobacteria; Oceanospirillales; Halomonadaceae	d__Bacteria;p__Pseudomonadota;c__Gammaproteobacteria;o__Pseudomonadales;f__Halomonadaceae;g__Bisbaumannia;s__Bisbaumannia salifodinae	GCF_039522585.1	95	Potential new species	NO	Same species
JCM 21221	Halomonas salina	Valid	Type	Bacteria; Pseudomonadati; Pseudomonadota; Gammaproteobacteria; Oceanospirillales; Halomonadaceae	d__Bacteria;p__Pseudomonadota;c__Gammaproteobacteria;o__Pseudomonadales;f__Halomonadaceae;g__Halomonas;s__Halomonas halophila	GCF_030406665.1	95	Potential new species	NO	Potentially different species
JCM 19368	Halomonas shantousis	Invalid	Type	Bacteria; Pseudomonadati; Pseudomonadota; Gammaproteobacteria; Oceanospirillales; Halomonadaceae	d__Bacteria;p__Pseudomonadota;c__Gammaproteobacteria;o__Pseudomonadales;f__Halomonadaceae;g__;s__	N/A	N/A	Potential new species	NO	Potentially different genus
JCM 20774	Marinomonas vaga	Valid	Type	Bacteria; Pseudomonadati; Pseudomonadota; Gammaproteobacteria; Oceanospirillales; Oceanospirillaceae	d__Bacteria;p__Pseudomonadota;c__Gammaproteobacteria;o__Pseudomonadales;f__Marinomonadaceae;g__Marinomonas;s__	N/A	N/A	Potential new species	YES	First genome at species level
JCM 2434	Aggregatibacter actinomycetemcomitans	Valid	Non-type	Bacteria; Pseudomonadati; Pseudomonadota; Gammaproteobacteria; Pasteurellales; Pasteurellaceae	d__Bacteria;p__Pseudomonadota;c__Gammaproteobacteria;o__Enterobacterales;f__Pasteurellaceae;g__Aggregatibacter;s__Aggregatibacter actinomycetemcomitans	GCF_000372365.1	95	Potential new species	YES	Same species
JCM 12291	Marinobacter alkaliphilus	Invalid	Type	Bacteria; Pseudomonadati; Pseudomonadota; Gammaproteobacteria; Pseudomonadales; Marinobacteraceae	d__Bacteria;p__Pseudomonadota;c__Gammaproteobacteria;o__Pseudomonadales;f__Oleiphilaceae;g__Marinobacter;s__Marinobacter shengliensis	GCF_003007715.1	95	Potential new species	YES	Potentially different species
JCM 21475	Azotobacter vinelandii	Valid	Type	Bacteria; Pseudomonadati; Pseudomonadota; Gammaproteobacteria; Pseudomonadales; Pseudomonadaceae	d__Bacteria;p__Pseudomonadota;c__Gammaproteobacteria;o__Pseudomonadales;f__Pseudomonadaceae;g__Azotobacter;s__Azotobacter vinelandii	GCF_027922225.1	95	Potential new species	NO	Same species
JCM 20301	Pseudomonas aeruginosa	Valid	Non-type	Bacteria; Pseudomonadati; Pseudomonadota; Gammaproteobacteria; Pseudomonadales; Pseudomonadaceae	d__Bacteria;p__Pseudomonadota;c__Gammaproteobacteria;o__Pseudomonadales;f__Pseudomonadaceae;g__Pseudomonas;s__Pseudomonas aeruginosa	GCF_001457615.1	95	Pseudomonas aeruginosa	YES	Same species
JCM 6156	Pseudomonas putida	Valid	Non-type	Bacteria; Pseudomonadati; Pseudomonadota; Gammaproteobacteria; Pseudomonadales; Pseudomonadaceae	d__Bacteria;p__Pseudomonadota;c__Gammaproteobacteria;o__Pseudomonadales;f__Pseudomonadaceae;g__Pseudomonas_E;s__Pseudomonas_E alloputida	GCF_021283545.2	95.44	Potential new species	YES	Known species
JCM 15514	Salinisphaera hydrothermalis	Valid	Type	Bacteria; Pseudomonadati; Pseudomonadota; Gammaproteobacteria; Salinisphaerales; Salinisphaeraceae	d__Bacteria;p__Pseudomonadota;c__Gammaproteobacteria;o__Nevskiales;f__Salinisphaeraceae;g__Salinisphaera;s__Salinisphaera hydrothermalis	GCF_040361195.1	95	Salinisphaera hydrothermalis	NO	Same species
JCM 17795	Galenea microaerophila	Valid	Type	Bacteria; Pseudomonadati; Pseudomonadota; Gammaproteobacteria; Thiotrichales; Piscirickettsiaceae	d__Bacteria;p__Pseudomonadota;c__Gammaproteobacteria;o__Thiomicrospirales;f__Thiomicrospiraceae;g__JALUXI01;s__	N/A	N/A	Potential new species	YES	First genome of isolates at genus or higher level
JCM 12397	Hydrogenovibrio thermophilus	Valid	Type	Bacteria; Pseudomonadati; Pseudomonadota; Gammaproteobacteria; Thiotrichales; Piscirickettsiaceae	d__Bacteria;p__Pseudomonadota;c__Gammaproteobacteria;o__Thiomicrospirales;f__Thiomicrospiraceae;g__Hydrogenovibrio;s__Hydrogenovibrio thermophilus	GCF_004028275.1	95	Potential new species	YES	Same species
JCM 30760	Thiomicrorhabdus hydrogeniphila	Valid	Type	Bacteria; Pseudomonadati; Pseudomonadota; Gammaproteobacteria; Thiotrichales; Piscirickettsiaceae	d__Bacteria;p__Pseudomonadota;c__Gammaproteobacteria;o__Thiomicrospirales;f__Thiomicrospiraceae;g__Thiomicrorhabdus;s__	N/A	N/A	Potential new species	YES	First genome at species level
JCM 18905	Vibrio sp.	N.A.	Non-type	Bacteria; Pseudomonadati; Pseudomonadota; Gammaproteobacteria; Vibrionales; Vibrionaceae	d__Bacteria;p__Pseudomonadota;c__Gammaproteobacteria;o__Enterobacterales;f__Vibrionaceae;g__Vibrio;s__Vibrio diabolicus	GCA_001048675.1	95	Vibrio diabolicus	NO	Known species
JCM 10831	Hydrogenophilus hirschii	Valid	Type	Bacteria; Pseudomonadati; Pseudomonadota; Hydrogenophilia; Hydrogenophilales; Hydrogenophilaceae	d__Bacteria;p__Pseudomonadota;c__Gammaproteobacteria;o__Burkholderiales;f__Rhodocyclaceae;g__Hydrogenophilus;s__Hydrogenophilus thermoluteolus	GCF_003574215.1	95	Potential new species	YES	Potentially different species
JCM 16106	Hydrogenophilus islandicus	Valid	Type	Bacteria; Pseudomonadati; Pseudomonadota; Hydrogenophilia; Hydrogenophilales; Hydrogenophilaceae	d__Bacteria;p__Pseudomonadota;c__Gammaproteobacteria;o__Burkholderiales;f__Rhodocyclaceae;g__Hydrogenophilus;s__	N/A	N/A	Potential new species	YES	First genome at species level
JCM 9785	Rhodothermus marinus	Valid	Non-type	Bacteria; Pseudomonadati; Rhodothermota; Rhodothermia; Rhodothermales; Rhodothermaceae	d__Bacteria;p__Bacteroidota_A;c__Rhodothermia;o__Rhodothermales;f__Rhodothermaceae;g__Rhodothermus;s__Rhodothermus marinus_A	GCF_009936275.1	95	Potential new species	YES	Same species
JCM 31343	Longimonas haloalkaliphila	Valid	Type	Bacteria; Pseudomonadati; Rhodothermota; Rhodothermia; Rhodothermales; Salinibacteraceae	d__Bacteria;p__Bacteroidota_A;c__Rhodothermia;o__Rhodothermales;f__Salinibacteraceae;g__Longimonas;s__	N/A	N/A	Potential new species	YES	First genome at species level
JCM 31342	Natronotalea proteinilytica	Valid	Type	Bacteria; Pseudomonadati; Rhodothermota; Rhodothermia; Rhodothermales; Salisaetaceae	d__Bacteria;p__Bacteroidota_A;c__Rhodothermia;o__Rhodothermales;f__Salinibacteraceae;g__Longimonas;s__	N/A	N/A	Potential new species	YES	First genome at species level
JCM 14728	Exilispira thermophila	Valid	Type	Bacteria; Pseudomonadati; Spirochaetota; Spirochaetia; Spirochaetales	d__Bacteria;p__Spirochaetota;c__JAAYUW01;o__JAAYUW01;f__JAOAHJ01;g__;s__	N/A	N/A	Potential new species	YES	First genome of isolates at genus or higher level
JCM 31475	Pleomorphochaeta caudata	Valid	Type	Bacteria; Pseudomonadati; Spirochaetota; Spirochaetia; Spirochaetales; Sphaerochaetaceae	d__Bacteria;p__Spirochaetota;c__Spirochaetia;o__Sphaerochaetales;f__Sphaerochaetaceae;g__RZYO01;s__RZYO01 sp963678415	GCA_963678415.1	95	Potential new species	YES	First genome of isolates at genus or higher level
JCM 31871	Pleomorphochaeta naphthae	Valid	Type	Bacteria; Pseudomonadati; Spirochaetota; Spirochaetia; Spirochaetales; Sphaerochaetaceae	d__Bacteria;p__Spirochaetota;c__Spirochaetia;o__Sphaerochaetales;f__Sphaerochaetaceae;g__RZYO01;s__	N/A	N/A	Potential new species	YES	First genome at species level
JCM 12856	Spirochaeta dissipatitropha	Valid	Type	Bacteria; Pseudomonadati; Spirochaetota; Spirochaetia; Spirochaetales; Spirochaetaceae	d__Bacteria;p__Spirochaetota;c__Spirochaetia;o__DSM-27196;f__DSM-8902;g__Spirochaeta_B;s__	N/A	N/A	Potential new species	YES	First genome at species level
JCM 30394	Deferrisoma palaeochoriense	Valid	Type	Bacteria; Pseudomonadati; Thermodesulfobacteriota; Deferrisomatia; Deferrisomatales; Deferrisomataceae	d__Bacteria;p__Desulfobacterota_C;c__Deferrisomatia;o__Deferrisomatales;f__Deferrisomataceae;g__Deferrisoma;s__	N/A	N/A	Potential new species	YES	First genome at species level
JCM 19179	Desulfatiglans parachlorophenolica	Valid	Type	Bacteria; Pseudomonadati; Thermodesulfobacteriota; Desulfobacteria; Desulfatiglandales; Desulfatiglandaceae	d__Bacteria;p__Desulfobacterota;c__DSM-4660;o__Desulfatiglandales;f__Desulfatiglandaceae;g__Desulfatiglans;s__	N/A	N/A	Potential new species	YES	First genome at species level
JCM 14469	Desulfatiferula olefinivorans	Valid	Type	Bacteria; Pseudomonadati; Thermodesulfobacteriota; Desulfobacteria; Desulfobacterales; Desulfobacteraceae	d__Bacteria;p__Desulfobacterota;c__Desulfobacteria;o__Desulfobacterales;f__Desulfolunaceae;g__JAHIRD01;s__	N/A	N/A	Potential new species	YES	First genome of isolates at genus or higher level
JCM 12294	Desulfocicer niacini	Valid	Type	Bacteria; Pseudomonadati; Thermodesulfobacteriota; Desulfobacteria; Desulfobacterales; Desulfobacteraceae	d__Bacteria;p__Desulfobacterota;c__Desulfobacteria;o__Desulfobacterales;f__Desulfobacteraceae;g__Desulfocicer;s__	N/A	N/A	Potential new species	YES	First genome at species level
JCM 16085	Desulfoconvexum algidum	Valid	Type	Bacteria; Pseudomonadati; Thermodesulfobacteriota; Desulfobacteria; Desulfobacterales; Desulfobacteraceae	d__Bacteria;p__Desulfobacterota;c__Desulfobacteria;o__Desulfobacterales;f__Desulfobacteraceae;g__NBML01;s__	N/A	N/A	Potential new species	YES	First genome of isolates at genus or higher level
JCM 12296	Desulfosarcina cetonica	Valid	Type	Bacteria; Pseudomonadati; Thermodesulfobacteriota; Desulfobacteria; Desulfobacterales; Desulfosarcinaceae	d__Bacteria;p__Desulfobacterota;c__Desulfobacteria;o__Desulfobacterales;f__Desulfosarcinaceae;g__Desulfosarcina;s__Desulfosarcina cetonica	GCF_001311845.1	95	Potential new species	NO	Same species
JCM 39068	Desulfocastanea catecholica	Valid	Type	Bacteria; Pseudomonadati; Thermodesulfobacteriota; Desulfobulbia; Desulfobulbales; Desulfobulbaceae	d__Bacteria;p__Desulfobacterota;c__Desulfobulbia;o__Desulfobulbales;f__Desulfocapsaceae;g__Desulforhopalus;s__	N/A	N/A	Potential new species	YES	First genome at species level
JCM 19994	Desulfogranum aggregans	Valid	Type	Bacteria; Pseudomonadati; Thermodesulfobacteriota; Desulfobulbia; Desulfobulbales; Desulfobulbaceae	d__Bacteria;p__Desulfobacterota;c__Desulfobulbia;o__Desulfobulbales;f__Desulfobulbaceae;g__Desulfogranum;s__	N/A	N/A	Potential new species	YES	First genome at species level
JCM 14714	Desulfomicrobium aestuarii	Invalid	Type	Bacteria; Pseudomonadati; Thermodesulfobacteriota; Desulfovibrionia; Desulfovibrionales; Desulfomicrobiaceae	d__Bacteria;p__Desulfobacterota_I;c__Desulfovibrionia;o__Desulfovibrionales;f__Desulfomicrobiaceae;g__Desulfomicrobium;s__Desulfomicrobium sp003542385	GCA_003542385.1	95	Potential new species	YES	First genome of named species
JCM 14713	Desulfomicrobium salsuginis	Invalid	Type	Bacteria; Pseudomonadati; Thermodesulfobacteriota; Desulfovibrionia; Desulfovibrionales; Desulfomicrobiaceae	d__Bacteria;p__Desulfobacterota_I;c__Desulfovibrionia;o__Desulfovibrionales;f__Desulfomicrobiaceae;g__Desulfomicrobium;s__Desulfomicrobium escambiense	GCF_000428825.1	95	Potential new species	YES	Potentially different species
JCM 31598	Desulfonatronum parangueonense	Valid	Type	Bacteria; Pseudomonadati; Thermodesulfobacteriota; Desulfovibrionia; Desulfovibrionales; Desulfonatronaceae	d__Bacteria;p__Desulfobacterota_I;c__Desulfovibrionia;o__Desulfovibrionales;f__Desulfonatronaceae;g__Desulfonatronum;s__	N/A	N/A	Potential new species	YES	First genome at species level
JCM 13028	Desulfonauticus autotrophicus	Valid	Type	Bacteria; Pseudomonadati; Thermodesulfobacteriota; Desulfovibrionia; Desulfovibrionales; Desulfonauticaceae	d__Bacteria;p__Desulfobacterota_I;c__Desulfovibrionia;o__Desulfovibrionales;f__Desulfonauticaceae;g__Desulfonauticus;s__Desulfonauticus sp001507915	GCA_001507915.1	95	Potential new species	YES	First genome of named species
JCM 12298	Desulfothermus naphthae	Valid	Type	Bacteria; Pseudomonadati; Thermodesulfobacteriota; Desulfovibrionia; Desulfovibrionales; Desulfothermaceae	d__Bacteria;p__Desulfobacterota_I;c__Desulfovibrionia;o__Desulfovibrionales;f__Desulfothermaceae;g__Desulfothermus;s__	N/A	N/A	Potential new species	YES	First genome at species level
JCM 13304	Desulfothermus okinawensis	Valid	Type	Bacteria; Pseudomonadati; Thermodesulfobacteriota; Desulfovibrionia; Desulfovibrionales; Desulfothermaceae	d__Bacteria;p__Desulfobacterota_I;c__Desulfovibrionia;o__Desulfovibrionales;f__Desulfothermaceae;g__Desulfothermus;s__Desulfothermus okinawensis	GCA_001311565.1	95	Potential new species	NO	Same species
JCM 16814	Desulfobaculum senezii	Valid	Type	Bacteria; Pseudomonadati; Thermodesulfobacteriota; Desulfovibrionia; Desulfovibrionales; Desulfovibrionaceae	d__Bacteria;p__Desulfobacterota_I;c__Desulfovibrionia;o__Desulfovibrionales;f__Desulfovibrionaceae;g__Desulfobaculum;s__	N/A	N/A	Oleidesulfovibrio vietnamensis	YES	Potentially different species
JCM 18546	Desulfocurvus thunnarius	Valid	Type	Bacteria; Pseudomonadati; Thermodesulfobacteriota; Desulfovibrionia; Desulfovibrionales; Desulfovibrionaceae	d__Bacteria;p__Desulfobacterota_I;c__Desulfovibrionia;o__Desulfovibrionales;f__Desulfovibrionaceae;g__Desulfocurvus;s__	N/A	N/A	Potential new species	YES	First genome at species level
JCM 30146	Desulfovibrio biadhensis	Valid	Type	Bacteria; Pseudomonadati; Thermodesulfobacteriota; Desulfovibrionia; Desulfovibrionales; Desulfovibrionaceae	d__Bacteria;p__Desulfobacterota_I;c__Desulfovibrionia;o__Desulfovibrionales;f__Desulfovibrionaceae;g__;s__	N/A	N/A	Potential new species	YES	Potentially different genus
JCM 12178	Desulfovibrio brasiliensis	Invalid	Type	Bacteria; Pseudomonadati; Thermodesulfobacteriota; Desulfovibrionia; Desulfovibrionales; Desulfovibrionaceae	d__Bacteria;p__Desulfobacterota_I;c__Desulfovibrionia;o__Desulfovibrionales;f__Desulfovibrionaceae;g__Pseudodesulfovibrio;s__Pseudodesulfovibrio brasiliensis	GCF_001311825.1	95	Salidesulfovibrio brasiliensis	NO	Same species
JCM 16812	Desulfovibrio simplex	Valid	Type	Bacteria; Pseudomonadati; Thermodesulfobacteriota; Desulfovibrionia; Desulfovibrionales; Desulfovibrionaceae	d__Bacteria;p__Desulfobacterota_I;c__Desulfovibrionia;o__Desulfovibrionales;f__Desulfovibrionaceae;g__Desulfovibrio;s__	N/A	N/A	Potential new species	YES	First genome at species level
JCM 15519	Fundidesulfovibrio butyratiphilus	Valid	Type	Bacteria; Pseudomonadati; Thermodesulfobacteriota; Desulfovibrionia; Desulfovibrionales; Desulfovibrionaceae	d__Bacteria;p__Desulfobacterota_I;c__Desulfovibrionia;o__Desulfovibrionales;f__Desulfovibrionaceae;g__;s__	N/A	N/A	Potential new species	YES	Potentially different genus
JCM 15971	Halodesulfovibrio oceani subsp. galateae	Valid	Type	Bacteria; Pseudomonadati; Thermodesulfobacteriota; Desulfovibrionia; Desulfovibrionales; Desulfovibrionaceae	d__Bacteria;p__Desulfobacterota_I;c__Desulfovibrionia;o__Desulfovibrionales;f__Desulfovibrionaceae;g__Halodesulfovibrio;s__	N/A	N/A	Potential new species	YES	First genome at species level
JCM 15970	Halodesulfovibrio oceani subsp. oceani	Valid	Type	Bacteria; Pseudomonadati; Thermodesulfobacteriota; Desulfovibrionia; Desulfovibrionales; Desulfovibrionaceae	d__Bacteria;p__Desulfobacterota_I;c__Desulfovibrionia;o__Desulfovibrionales;f__Desulfovibrionaceae;g__Halodesulfovibrio;s__	N/A	N/A	Potential new species	YES	First genome at species level
JCM 14124	Humidesulfovibrio idahonensis	Valid	Type	Bacteria; Pseudomonadati; Thermodesulfobacteriota; Desulfovibrionia; Desulfovibrionales; Desulfovibrionaceae	d__Bacteria;p__Desulfobacterota_I;c__Desulfovibrionia;o__Desulfovibrionales;f__Desulfovibrionaceae;g__Humidesulfovibrio;s__	N/A	N/A	Potential new species	YES	Same species
JCM 31065	Maridesulfovibrio salinus	Valid	Type	Bacteria; Pseudomonadati; Thermodesulfobacteriota; Desulfovibrionia; Desulfovibrionales; Desulfovibrionaceae	d__Bacteria;p__Desulfobacterota_I;c__Desulfovibrionia;o__Desulfovibrionales;f__Desulfovibrionaceae;g__Maridesulfovibrio;s__	N/A	N/A	Potential new species	YES	First genome at species level
JCM 14635	Megalodesulfovibrio paquesii	Valid	Type	Bacteria; Pseudomonadati; Thermodesulfobacteriota; Desulfovibrionia; Desulfovibrionales; Desulfovibrionaceae	d__Bacteria;p__Desulfobacterota_I;c__Desulfovibrionia;o__Desulfovibrionales;f__Desulfovibrionaceae;g__Megalodesulfovibrio;s__	N/A	N/A	Potential new species	YES	Same species
JCM 14040	Oceanidesulfovibrio marinus	Valid	Type	Bacteria; Pseudomonadati; Thermodesulfobacteriota; Desulfovibrionia; Desulfovibrionales; Desulfovibrionaceae	d__Bacteria;p__Desulfobacterota_I;c__Desulfovibrionia;o__Desulfovibrionales;f__Desulfovibrionaceae;g__Oceanidesulfovibrio;s__Oceanidesulfovibrio marinus	GCF_013085545.1	95	Potential new species	YES	Same species
JCM 15785	Oleidesulfovibrio vietnamensis	Valid	Type	Bacteria; Pseudomonadati; Thermodesulfobacteriota; Desulfovibrionia; Desulfovibrionales; Desulfovibrionaceae	d__Bacteria;p__Desulfobacterota_I;c__Desulfovibrionia;o__Desulfovibrionales;f__Desulfovibrionaceae;g__Oleidesulfovibrio;s__Oleidesulfovibrio alaskensis	GCF_000482745.1	95	Potential new species	YES	Potentially different species
JCM 30471	Desulfuromonas carbonis	Valid	Type	Bacteria; Pseudomonadati; Thermodesulfobacteriota; Desulfuromonadia; Desulfuromonadales; Desulfuromonadaceae	d__Bacteria;p__Desulfobacterota;c__Desulfuromonadia;o__Desulfuromonadales;f__DDH964;g__DDH964;s__DDH964 sp001611275	GCF_001611275.1	95	Potential new species	YES	Potentially different genus
JCM 12927	Desulfuromonas svalbardensis	Valid	Type	Bacteria; Pseudomonadati; Thermodesulfobacteriota; Desulfuromonadia; Desulfuromonadales; Desulfuromonadaceae	d__Bacteria;p__Desulfobacterota;c__Desulfuromonadia;o__Desulfuromonadales;f__Desulfuromonadaceae;g__Desulfuromonas;s__	N/A	N/A	Potential new species	YES	First genome at species level
JCM 12926	Desulfuromusa ferrireducens	Valid	Type	Bacteria; Pseudomonadati; Thermodesulfobacteriota; Desulfuromonadia; Desulfuromonadales; Desulfuromonadaceae	d__Bacteria;p__Desulfobacterota;c__Desulfuromonadia;o__Desulfuromonadales;f__Geopsychrobacteraceae;g__Malonomonas;s__	N/A	N/A	Potential new species	YES	First genome at species level
JCM 15764	Geotalea toluenoxydans	Valid	Type	Bacteria; Pseudomonadati; Thermodesulfobacteriota; Desulfuromonadia; Geobacterales; Geobacteraceae	d__Bacteria;p__Desulfobacterota;c__Desulfuromonadia;o__Geobacterales;f__Geobacteraceae;g__Geotalea;s__Geotalea toluenoxydans	GCF_001311985.1	95	Potential new species	NO	Same species
JCM 16410	Desulfosoma profundi	Valid	Type	Bacteria; Pseudomonadati; Thermodesulfobacteriota; Syntrophobacteria; Syntrophobacterales; Syntrophobacteraceae	d__Bacteria;p__Desulfobacterota;c__Syntrophobacteria;o__Syntrophobacterales;f__DSM-9756;g__Desulfosoma;s__	N/A	N/A	Potential new species	YES	First genome at species level
JCM 14805	Prosthecobacter fluviatilis	Valid	Type	Bacteria; Pseudomonadati; Verrucomicrobiota; Verrucomicrobiia; Verrucomicrobiales; Verrucomicrobiaceae	d__Bacteria;p__Verrucomicrobiota;c__Verrucomicrobiia;o__Verrucomicrobiales;f__Verrucomicrobiaceae;g__Prosthecobacter;s__	N/A	N/A	Potential new species	NO	First genome at species level
JCM 15963	Rhabdothermus arcticus	Valid	Type	Bacteria; Thermotogati; Deinococcota; Deinococci; Thermales; Thermaceae	d__Bacteria;p__Deinococcota;c__Deinococci;o__Deinococcales;f__Marinithermaceae;g__WFXV01;s__	N/A	N/A	Potential new species	YES	First genome of isolates at genus or higher level
JCM 11602	Thermus brockianus	Valid	Type	Bacteria; Thermotogati; Deinococcota; Deinococci; Thermales; Thermaceae	d__Bacteria;p__Deinococcota;c__Deinococci;o__Deinococcales;f__Thermaceae;g__Thermus;s__Thermus brockianus	GCF_001880325.1	95	Potential new species	YES	Same species
JCM 12314	Thermus kawarayensis	Invalid	Type	Bacteria; Thermotogati; Deinococcota; Deinococci; Thermales; Thermaceae	d__Bacteria;p__Deinococcota;c__Deinococci;o__Deinococcales;f__Thermaceae;g__Thermus;s__	N/A	N/A	Potential new species	NO	Same species
JCM 11956	Vulcanithermus mediatlanticus	Valid	Type	Bacteria; Thermotogati; Deinococcota; Deinococci; Thermales; Thermaceae	d__Bacteria;p__Deinococcota;c__Deinococci;o__Deinococcales;f__Marinithermaceae;g__WFXV01;s__	N/A	N/A	Potential new species	YES	First genome of isolates at genus or higher level
JCM 19320	Aminobacterium thunnarium	Valid	Type	Bacteria; Thermotogati; Synergistota; Synergistia; Synergistales; Aminobacteriaceae	d__Bacteria;p__Synergistota;c__Synergistia;o__Synergistales;f__Aminobacteriaceae;g__Aminobacterium;s__Aminobacterium sp002432275	GCF_030908405.1	95	Potential new species	YES	First genome of named species
JCM 17151	Lactivibrio alcoholicus	Valid	Type	Bacteria; Thermotogati; Synergistota; Synergistia; Synergistales; Aminobacteriaceae	d__Bacteria;p__Synergistota;c__Synergistia;o__Synergistales;f__Aminobacteriaceae;g__CALFXN01;s__CALFXN01 sp937957815	GCA_036788195.1	95	Potential new species	YES	First genome of isolates at genus or higher level
JCM 18154	Mesotoga infera	Valid	Type	Bacteria; Thermotogati; Thermotogota; Thermotogae; Kosmotogales; Kosmotogaceae	d__Bacteria;p__Thermotogota;c__Thermotogae;o__Petrotogales;f__Kosmotogaceae;g__Mesotoga;s__Mesotoga infera	GCF_900157305.1	95	Potential new species	YES	Same species
JCM 17210	Defluviitoga tunisiensis	Valid	Type	Bacteria; Thermotogati; Thermotogota; Thermotogae; Petrotogales; Petrotogaceae	d__Bacteria;p__Thermotogota;c__Thermotogae;o__Petrotogales;f__Petrotogaceae;g__Defluviitoga;s__Defluviitoga tunisiensis	GCF_000953715.1	95	Potential new species	YES	Same species
JCM 30566	Marinitoga arctica	Valid	Type	Bacteria; Thermotogati; Thermotogota; Thermotogae; Petrotogales; Petrotogaceae	d__Bacteria;p__Thermotogota;c__Thermotogae;o__Petrotogales;f__Petrotogaceae;g__Marinitoga;s__	N/A	N/A	Potential new species	YES	First genome at species level
JCM 13303	Marinitoga okinawensis	Valid	Type	Bacteria; Thermotogati; Thermotogota; Thermotogae; Petrotogales; Petrotogaceae	d__Bacteria;p__Thermotogota;c__Thermotogae;o__Petrotogales;f__Petrotogaceae;g__Marinitoga;s__	N/A	N/A	Potential new species	YES	First genome at species level
