# Supplementary material
Source: HighWire-hosted journal article supplement (doi:10.1101/gr.281026.125)
Supplement: Supplemental_Table_S4.xlsx [file Supplemental_Table_S4.xlsx]

## Sheet: TableS4
Supplemental Table S4. Actual and predicted optimal growth temperatures of 284 type strains.
JCM number	Scientific name	Actual optimal grrowth temperature (ºC)	Predicted optimal growth temperature (ºC)		Taxonomy (ICNP-based)
			by Tome	by OGTFinder
JCM 17269	Halovenus rubra	42	38.67	40.9	Archaea; Methanobacteriati; Halobacteriota; Halobacteria; Halobacteriales; Haloarculaceae
JCM 19908	Halobacterium rubrum	35–37	38.56	43.2	Archaea; Methanobacteriati; Halobacteriota; Halobacteria; Halobacteriales; Halobacteriaceae
JCM 11890	Halalkalicoccus tibetensis	40	36.84	37.4	Archaea; Methanobacteriati; Halobacteriota; Halobacteria; Halobacteriales; Halococcaceae
JCM 30029	Halobium salinum	37	35.9	37.2	Archaea; Methanobacteriati; Halobacteriota; Halobacteria; Halobacteriales; Haloferacaceae
JCM 30237	Halolamina litorea	37	34.58	38.4	Archaea; Methanobacteriati; Halobacteriota; Halobacteria; Halobacteriales; Haloferacaceae
JCM 18549	Halolamina salina	37	36.16	38.5	Archaea; Methanobacteriati; Halobacteriota; Halobacteria; Halobacteriales; Haloferacaceae
JCM 30442	Haloparvum alkalitolerans	45–50	35.51	39.1	Archaea; Methanobacteriati; Halobacteriota; Halobacteria; Halobacteriales; Haloferacaceae
JCM 17506	Halopelagius fulvigenes	37–42	38.24	40	Archaea; Methanobacteriati; Halobacteriota; Halobacteria; Halobacteriales; Haloferacaceae
JCM 18641	Halopenitus salinus	37	38.52	41.6	Archaea; Methanobacteriati; Halobacteriota; Halobacteria; Halobacteriales; Haloferacaceae
JCM 17092	Haloplanus litoreus	37	35.44	39.1	Archaea; Methanobacteriati; Halobacteriota; Halobacteria; Halobacteriales; Haloferacaceae
JCM 14265	Halorubrum ejinorense	37	36.71	40.9	Archaea; Methanobacteriati; Halobacteriota; Halobacteria; Halobacteriales; Haloferacaceae
JCM 17823	Halorubrum gandharaense	45	36.29	40.2	Archaea; Methanobacteriati; Halobacteriota; Halobacteria; Halobacteriales; Haloferacaceae
JCM 18237	Halorubrum luteum	33–37	37.12	42.3	Archaea; Methanobacteriati; Halobacteriota; Halobacteria; Halobacteriales; Haloferacaceae
JCM 30955	Halorubrum pallidum	38	36.39	41.8	Archaea; Methanobacteriati; Halobacteriota; Halobacteria; Halobacteriales; Haloferacaceae
JCM 11889	Halorubrum tibetense	37–40	36.26	42.7	Archaea; Methanobacteriati; Halobacteriota; Halobacteria; Halobacteriales; Haloferacaceae
JCM 31271	Halorubrum trueperi	42–45	35.14	40.9	Archaea; Methanobacteriati; Halobacteriota; Halobacteria; Halobacteriales; Haloferacaceae
JCM 30665	Halorubrum yunnanense	42–45	36.56	39.8	Archaea; Methanobacteriati; Halobacteriota; Halobacteria; Halobacteriales; Haloferacaceae
JCM 18642	Haloarchaeobius amylolyticus	37	36.21	38.6	Archaea; Methanobacteriati; Halobacteriota; Halobacteria; Halobacteriales; Halorubellaceae
JCM 17117	Halorubellus litoreus	37	37.8	44.7	Archaea; Methanobacteriati; Halobacteriota; Halobacteria; Halobacteriales; Halorubellaceae
JCM 19583	Halopiger thermotolerans	45	37.43	40.9	Archaea; Methanobacteriati; Halobacteriota; Halobacteria; Halobacteriales; Natrialbaceae
JCM 16592	Halostagnicola alkaliphila	37	37.45	40.5	Archaea; Methanobacteriati; Halobacteriota; Halobacteria; Halobacteriales; Natrialbaceae
JCM 18750	Halostagnicola bangensis	37	37.69	41.4	Archaea; Methanobacteriati; Halobacteriota; Halobacteria; Halobacteriales; Natrialbaceae
JCM 31939	Natronobiforma cellulositropha	43	39.58	39.5	Archaea; Methanobacteriati; Halobacteriota; Halobacteria; Halobacteriales; Natrialbaceae
JCM 16328	Natronoarchaeum mannanilyticum	37	37.24	39	Archaea; Methanobacteriati; Halobacteriota; Halobacteria; Halobacteriales; Natronoarchaeaceae
JCM 19597	Salinarchaeum chitinilyticum	40	37.61	41	Archaea; Methanobacteriati; Halobacteriota; Halobacteria; Halobacteriales; Natronoarchaeaceae
JCM 15416	Methanobacterium flexile	35–38	34.41	37.6	Archaea; Methanobacteriati; Methanobacteriota; Methanobacteria; Methanobacteriales; Methanobacteriaceae
JCM 15797	Methanobacterium kanagiense	40	38.73	39.2	Archaea; Methanobacteriati; Methanobacteriota; Methanobacteria; Methanobacteriales; Methanobacteriaceae
JCM 15415	Methanobacterium movens	35–38	38.02	42.5	Archaea; Methanobacteriati; Methanobacteriota; Methanobacteria; Methanobacteriales; Methanobacteriaceae
JCM 18470	Methanobacterium movilense	33	37.42	39.2	Archaea; Methanobacteriati; Methanobacteriota; Methanobacteria; Methanobacteriales; Methanobacteriaceae
JCM 10723	Methanothermus sociabilis	88	79.95	76.7	Archaea; Methanobacteriati; Methanobacteriota; Methanobacteria; Methanobacteriales; Methanothermaceae
JCM 17393	Methanothermobacter crinale	65	65.74	66.5	Archaea; Methanobacteriati; Methanobacteriota; Methanobacteria; Methanobacteriales; Methanothermobacteraceae
JCM 11886	Methanocaldococcus indicus	85	77.07	86.1	Archaea; Methanobacteriati; Methanobacteriota; Methanococci; Methanococcales; Methanocaldococcaceae
JCM 10627	Methanocalculus pumilus	35	37	37.5	Archaea; Methanobacteriati; Methanobacteriota; Methanomicrobia; Methanomicrobiales; Methanocalculaceae
JCM 10550	Methanogenium cariaci	20–25	29.43	27.8	Archaea; Methanobacteriati; Methanobacteriota; Methanomicrobia; Methanomicrobiales; Methanomicrobiaceae
JCM 11281	Methanosarcina baltica	25	38.79	34.6	Archaea; Methanobacteriati; Methanobacteriota; Methanomicrobia; Methanosarcinales; Methanosarcinaceae
JCM 15540	Methanosarcina subterranea	35	35.83	36.3	Archaea; Methanobacteriati; Methanobacteriota; Methanomicrobia; Methanosarcinales; Methanosarcinaceae
JCM 13384	Palaeococcus helgesonii	80	83.72	80.6	Archaea; Methanobacteriati; Methanobacteriota; Thermococci; Thermococcales; Thermococcaceae
JCM 8421	Pyrococcus woesei	100–103	91.26	95.2	Archaea; Methanobacteriati; Methanobacteriota; Thermococci; Thermococcales; Thermococcaceae
JCM 10828	Thermococcus aegaeus	90	84.56	85	Archaea; Methanobacteriati; Methanobacteriota; Thermococci; Thermococcales; Thermococcaceae
JCM 16138	Thermococcus atlanticus	85	83.8	81.8	Archaea; Methanobacteriati; Methanobacteriota; Thermococci; Thermococcales; Thermococcaceae
JCM 12540	Thermococcus coalescens	87	82.74	82.2	Archaea; Methanobacteriati; Methanobacteriota; Thermococci; Thermococcales; Thermococcaceae
JCM 10128	Thermococcus fumicolans	85	80.49	85.4	Archaea; Methanobacteriati; Methanobacteriota; Thermococci; Thermococcales; Thermococcaceae
JCM 11825	Thermococcus marinus	88	82.87	83.9	Archaea; Methanobacteriati; Methanobacteriota; Thermococci; Thermococcales; Thermococcaceae
JCM 16307	Thermococcus prieurii	80	84.33	85.4	Archaea; Methanobacteriati; Methanobacteriota; Thermococci; Thermococcales; Thermococcaceae
JCM 10985	Thermococcus waiotapuensis	85	80.73	83.3	Archaea; Methanobacteriati; Methanobacteriota; Thermococci; Thermococcales; Thermococcaceae
JCM 13583	Thermogymnomonas acidicola	60	57.97	63.9	Archaea; Methanobacteriati; Thermoplasmatota; Thermoplasmata; Thermoplasmatales
JCM 11320	Acidilobus aceticus	85	79.46	76.6	Archaea; Thermoproteati; Thermoproteota; Thermoprotei; Acidilobales; Acidilobaceae
JCM 13516	Caldococcus noboribetus	92	80.21	75.7	Archaea; Thermoproteati; Thermoproteota; Thermoprotei; Desulfurococcales
JCM 10135	Stetteria hydrogenophila	95	94.28	94.1	Archaea; Thermoproteati; Thermoproteota; Thermoprotei; Desulfurococcales; Desulfurococcaceae
JCM 10309	Sulfophobococcus zilligii	85	77.52	94.4	Archaea; Thermoproteati; Thermoproteota; Thermoprotei; Desulfurococcales; Desulfurococcaceae
JCM 11597	Thermodiscus maritimus	90	92.92	93.8	Archaea; Thermoproteati; Thermoproteota; Thermoprotei; Desulfurococcales; Desulfurococcaceae
JCM 9392	Pyrodictium brockii	105	95.81	93.4	Archaea; Thermoproteati; Thermoproteota; Thermoprotei; Desulfurococcales; Pyrodictiaceae
JCM 10088	Thermocladium modestius	75	71.91	69.9	Archaea; Thermoproteati; Thermoproteota; Thermoprotei; Thermoproteales; Thermocladiaceae
JCM 9190	Pyrobaculum organotrophum	100	95.47	95.6	Archaea; Thermoproteati; Thermoproteota; Thermoprotei; Thermoproteales; Thermoproteaceae
JCM 17229	Thermoproteus thermophilus	85	88.93	91.6	Archaea; Thermoproteati; Thermoproteota; Thermoprotei; Thermoproteales; Thermoproteaceae
JCM 9957	Kineosporia succinea	28	26.51	26.7	Bacteria; Bacillati; Actinomycetota; Actinomycetes; Kineosporiales; Kineosporiaceae
JCM 13580	Streptomyces drozdowiczii	28	27.52	26.2	Bacteria; Bacillati; Actinomycetota; Actinomycetes; Kitasatosporales; Streptomycetaceae
JCM 12681	Streptomyces mexicanus	37	28.59	30.1	Bacteria; Bacillati; Actinomycetota; Actinomycetes; Kitasatosporales; Streptomycetaceae
JCM 4814	Streptomyces phaeofaciens	28	26.96	27.8	Bacteria; Bacillati; Actinomycetota; Actinomycetes; Kitasatosporales; Streptomycetaceae
JCM 4914	Streptomyces platensis subsp. malvinus	28	28.26	28.4	Bacteria; Bacillati; Actinomycetota; Actinomycetes; Kitasatosporales; Streptomycetaceae
JCM 18882	Brevibacterium metallidurans	30	31.18	27.1	Bacteria; Bacillati; Actinomycetota; Actinomycetes; Micrococcales; Brevibacteriaceae
JCM 16927	Cellulomonas chitinilytica	25	29.64	28.6	Bacteria; Bacillati; Actinomycetota; Actinomycetes; Micrococcales; Cellulomonadaceae
JCM 18110	Cellulomonas iranensis	30	29.68	30.7	Bacteria; Bacillati; Actinomycetota; Actinomycetes; Micrococcales; Cellulomonadaceae
JCM 18755	Cellulomonas pakistanensis	28–32	28.65	29.7	Bacteria; Bacillati; Actinomycetota; Actinomycetes; Micrococcales; Cellulomonadaceae
JCM 18111	Cellulomonas persica	30	29.66	30	Bacteria; Bacillati; Actinomycetota; Actinomycetes; Micrococcales; Cellulomonadaceae
JCM 15471	Brachybacterium zhongshanense	28	30.18	26.9	Bacteria; Bacillati; Actinomycetota; Actinomycetes; Micrococcales; Dermabacteraceae
JCM 13591	Microbacterium xylanilyticum	28	29.86	29.6	Bacteria; Bacillati; Actinomycetota; Actinomycetes; Micrococcales; Microbacteriaceae
JCM 14115	Paenarthrobacter nitroguajacolicus	25–30	28.01	26.9	Bacteria; Bacillati; Actinomycetota; Actinomycetes; Micrococcales; Micrococcaceae
JCM 11754	Isoptericola variabilis	28	28.73	28.8	Bacteria; Bacillati; Actinomycetota; Actinomycetes; Micrococcales; Promicromonosporaceae
JCM 9534	Catenuloplanes indicus	28	28.11	28.6	Bacteria; Bacillati; Actinomycetota; Actinomycetes; Micromonosporales; Micromonosporaceae
JCM 9533	Catenuloplanes niger	28	27.66	28.3	Bacteria; Bacillati; Actinomycetota; Actinomycetes; Micromonosporales; Micromonosporaceae
JCM 7447	Corynebacterium amycolatum	37	36.27	34.6	Bacteria; Bacillati; Actinomycetota; Actinomycetes; Mycobacteriales; Corynebacteriaceae
JCM 12107	Corynebacterium simulans	37	35.93	33.3	Bacteria; Bacillati; Actinomycetota; Actinomycetes; Mycobacteriales; Corynebacteriaceae
JCM 16369	Mycolicibacterium crocinum	28	35.36	33.1	Bacteria; Bacillati; Actinomycetota; Actinomycetes; Mycobacteriales; Mycobacteriaceae
JCM 12141	Mycolicibacterium hodleri	28	32.78	31.4	Bacteria; Bacillati; Actinomycetota; Actinomycetes; Mycobacteriales; Mycobacteriaceae
JCM 16370	Mycolicibacterium pallens	28	35.36	33	Bacteria; Bacillati; Actinomycetota; Actinomycetes; Mycobacteriales; Mycobacteriaceae
JCM 15927	Mycolicibacterium pyrenivorans	35	33.79	32.5	Bacteria; Bacillati; Actinomycetota; Actinomycetes; Mycobacteriales; Mycobacteriaceae
JCM 10703	Nocardioides nitrophenolicus	30	28.7	28.9	Bacteria; Bacillati; Actinomycetota; Actinomycetes; Propionibacteriales; Nocardioidaceae
JCM 10369	Nocardioides pyridinolyticus	35	28.26	30.8	Bacteria; Bacillati; Actinomycetota; Actinomycetes; Propionibacteriales; Nocardioidaceae
JCM 3263	Thermobifida fusca	45–50	47.58	40	Bacteria; Bacillati; Actinomycetota; Actinomycetes; Streptosporangiales; Nocardiopsidaceae
JCM 10596	Caldalkalibacillus mannanilyticus	37	32.98	37.9	Bacteria; Bacillati; Bacillota; Bacilli; Bacillales; Bacillaceae
JCM 21714	Gracilibacillus boraciitolerans	25–28	30.16	35.7	Bacteria; Bacillati; Bacillota; Bacilli; Bacillales; Bacillaceae
JCM 9157	Halalkalibacter akibai	37	31.57	32.9	Bacteria; Bacillati; Bacillota; Bacilli; Bacillales; Bacillaceae
JCM 9140	Halalkalibacter wakoensis	37	32.82	35.8	Bacteria; Bacillati; Bacillota; Bacilli; Bacillales; Bacillaceae
JCM 12149	Lentibacillus halophilus	30–37	27.71	31.2	Bacteria; Bacillati; Bacillota; Bacilli; Bacillales; Bacillaceae
JCM 30234	Lentibacillus kimchii	30	29.55	31.6	Bacteria; Bacillati; Bacillota; Bacilli; Bacillales; Bacillaceae
JCM 18776	Lysinibacillus pakistanensis	28	30.46	31.5	Bacteria; Bacillati; Bacillota; Bacilli; Bacillales; Bacillaceae
JCM 12389	Salinibacillus aidingensis	37	32.9	37.3	Bacteria; Bacillati; Bacillota; Bacilli; Bacillales; Bacillaceae
JCM 30907	Virgibacillus ainsalahensis	30	28.56	32.8	Bacteria; Bacillati; Bacillota; Bacilli; Bacillales; Bacillaceae
JCM 32284	Virgibacillus kimchii	37	29.64	37	Bacteria; Bacillati; Bacillota; Bacilli; Bacillales; Bacillaceae
JCM 15395	Virgibacillus siamensis	37	28.11	33.1	Bacteria; Bacillati; Bacillota; Bacilli; Bacillales; Bacillaceae
JCM 16418	Paenibacillus pini	20–30	26.34	27.5	Bacteria; Bacillati; Bacillota; Bacilli; Bacillales; Paenibacillaceae
JCM 14719	Calditerricola satsumensis	78	77.11	70.9	Bacteria; Bacillati; Bacillota; Bacilli; Calditerricolales; Calditerricolaceae
JCM 14720	Calditerricola yamamurae	72	75.81	71.4	Bacteria; Bacillati; Bacillota; Bacilli; Calditerricolales; Calditerricolaceae
JCM 31185	Furfurilactobacillus curtus	30	35.55	25.8	Bacteria; Bacillati; Bacillota; Bacilli; Lactobacillales; Lactobacillaceae
JCM 17300	Ligilactobacillus faecis	37	38.39	36.1	Bacteria; Bacillati; Bacillota; Bacilli; Lactobacillales; Lactobacillaceae
JCM 18671	Secundilactobacillus oryzae	30	29.06	31.2	Bacteria; Bacillati; Bacillota; Bacilli; Lactobacillales; Lactobacillaceae
JCM 31116	Streptococcus alactolyticus	37	37.01	34	Bacteria; Bacillati; Bacillota; Bacilli; Lactobacillales; Streptococcaceae
JCM 12261	Streptococcus gallolyticus subsp. pasteurianus	37	36.05	32	Bacteria; Bacillati; Bacillota; Bacilli; Lactobacillales; Streptococcaceae
JCM 16981	Salinicoccus jeotgali	30	29.94	32.4	Bacteria; Bacillati; Bacillota; Bacilli; Staphylococcales; Salinicoccaceae
JCM 19029	Salinicoccus sesuvii	28	28.05	32.9	Bacteria; Bacillati; Bacillota; Bacilli; Staphylococcales; Salinicoccaceae
JCM 12822	Salinicoccus siamensis	37	30.71	33	Bacteria; Bacillati; Bacillota; Bacilli; Staphylococcales; Salinicoccaceae
JCM 19376	Fusibacter bizertensis	30	27.72	28.4	Bacteria; Bacillati; Bacillota; Clostridia; Eubacteriales
JCM 19912	Fusibacter fontis	30	30.94	30.9	Bacteria; Bacillati; Bacillota; Clostridia; Eubacteriales
JCM 13267	Howardella ureilytica	37	37.78	37.2	Bacteria; Bacillati; Bacillota; Clostridia; Eubacteriales
JCM 30795	Agathobaculum butyriciproducens	37	35.49	35.4	Bacteria; Bacillati; Bacillota; Clostridia; Eubacteriales; Butyricicoccaceae
JCM 1385	Clostridium baratii	37	36.99	35.7	Bacteria; Bacillati; Bacillota; Clostridia; Eubacteriales; Clostridiaceae
JCM 9989	Clostridium budayi	37	38.27	36.1	Bacteria; Bacillati; Bacillota; Clostridia; Eubacteriales; Clostridiaceae
JCM 1393	Clostridium carnis	37	36.66	35.8	Bacteria; Bacillati; Bacillota; Clostridia; Eubacteriales; Clostridiaceae
JCM 14030	Clostridium nitrophenolicum	30	38.14	37.1	Bacteria; Bacillati; Bacillota; Clostridia; Eubacteriales; Clostridiaceae
JCM 1406	Clostridium novyi	37	38.41	41.7	Bacteria; Bacillati; Bacillota; Clostridia; Eubacteriales; Clostridiaceae
JCM 21531	Acetivibrio straminisolvens	50–55	48.85	44.6	Bacteria; Bacillati; Bacillota; Clostridia; Eubacteriales; Oscillospiraceae
JCM 17042	Ruminococcus champanellensis	39	36.82	36	Bacteria; Bacillati; Bacillota; Clostridia; Eubacteriales; Oscillospiraceae
JCM 17209	Desulfovectis peckii	55–60	53.1	51.4	Bacteria; Bacillati; Bacillota; Clostridia; Eubacteriales; Peptococcaceae
JCM 15048	Symbiobacterium ostreiconchae	55	58.44	55.8	Bacteria; Bacillati; Bacillota; Clostridia; Eubacteriales; Symbiobacteriaceae
JCM 15996	Symbiobacterium turbinis	55–60	54.68	53.1	Bacteria; Bacillati; Bacillota; Clostridia; Eubacteriales; Symbiobacteriaceae
JCM 18213	Halanaerobium sehlinense	43	38.45	39.4	Bacteria; Bacillati; Bacillota; Clostridia; Halanaerobiales; Halanaerobiaceae
JCM 15060	Halanaerobaculum tunisiense	42	35.26	39.7	Bacteria; Bacillati; Bacillota; Clostridia; Halanaerobiales; Halobacteroidaceae
JCM 16358	Halanaerocella petrolearia	40–45	33.57	41.3	Bacteria; Bacillati; Bacillota; Clostridia; Halanaerobiales; Halobacteroidaceae
JCM 16312	Defluviitalea saccharophila	50–55	39.39	42.5	Bacteria; Bacillati; Bacillota; Clostridia; Lachnospirales; Defluviitaleaceae
JCM 17205	Blautia faecis	37	36.92	35.8	Bacteria; Bacillati; Bacillota; Clostridia; Lachnospirales; Lachnospiraceae
JCM 17039	Blautia glucerasea	37	37.98	36.7	Bacteria; Bacillati; Bacillota; Clostridia; Lachnospirales; Lachnospiraceae
JCM 17204	Blautia stercoris	37	36.76	38.7	Bacteria; Bacillati; Bacillota; Clostridia; Lachnospirales; Lachnospiraceae
JCM 18507	Fusicatenibacter saccharivorans	37	37.32	36.3	Bacteria; Bacillati; Bacillota; Clostridia; Lachnospirales; Lachnospiraceae
JCM 15917	Mediterraneibacter faecis	37	37.06	38.6	Bacteria; Bacillati; Bacillota; Clostridia; Lachnospirales; Lachnospiraceae
JCM 13368	Mediterraneibacter glycyrrhizinilyticus	37	36.02	38.1	Bacteria; Bacillati; Bacillota; Clostridia; Lachnospirales; Lachnospiraceae
JCM 17581	Roseburia faecis	37	37.97	38.2	Bacteria; Bacillati; Bacillota; Clostridia; Lachnospirales; Lachnospiraceae
JCM 11672	Alkaliphilus crotonatoxidans	37	37.43	38.7	Bacteria; Bacillati; Bacillota; Clostridia; Peptostreptococcales; Natronincolaceae
JCM 13990	Tindallia texcoconensis	35	31.4	36	Bacteria; Bacillati; Bacillota; Clostridia; Peptostreptococcales; Tindalliaceae
JCM 16816	Thermoanaerobacter brockii subsp. lactiethylicus	55–60	63.68	67.8	Bacteria; Bacillati; Bacillota; Clostridia; Thermoanaerobacterales; Thermoanaerobacteraceae
JCM 18270	Thermoanaerobacterium calidifontis	50–55	59.02	52	Bacteria; Bacillati; Bacillota; Clostridia; Thermoanaerobacterales; Thermoanaerobacteraceae
JCM 15765	Desulfitobacterium aromaticivorans	30	35.79	39.7	Bacteria; Bacillati; Bacillota; Desulfitobacteriia; Desulfitobacteriales; Desulfitobacteriaceae
JCM 17380	Desulfosporosinus burensis	25	31.23	30.9	Bacteria; Bacillati; Bacillota; Desulfitobacteriia; Desulfitobacteriales; Desulfitobacteriaceae
JCM 31105	Desulfosporosinus nitroreducens	25	26.9	29.9	Bacteria; Bacillati; Bacillota; Desulfitobacteriia; Desulfitobacteriales; Desulfitobacteriaceae
JCM 14036	Desulfotomaculum defluvii	37	35.86	37.7	Bacteria; Bacillati; Bacillota; Desulfotomaculia; Desulfotomaculales; Desulfotomaculaceae
JCM 39194	Desulfotomaculum varum	50	45.08	52.1	Bacteria; Bacillati; Bacillota; Desulfotomaculia; Desulfotomaculales; Desulfotomaculaceae
JCM 10604	Coprobacillus cateniformis	37	38.99	41.7	Bacteria; Bacillati; Bacillota; Erysipelotrichia; Erysipelotrichales; Coprobacillaceae
JCM 30191	Breznakia pachnodae	20–30	33.21	36.5	Bacteria; Bacillati; Bacillota; Erysipelotrichia; Erysipelotrichales; Erysipelotrichaceae
JCM 32836	Desulfosporomusa polytropa	28	30.39	33.7	Bacteria; Bacillati; Bacillota; Negativicutes; Selenomonadales; Sporomusaceae
JCM 13218	Sporomusa intestinalis	35‒37	33.04	37	Bacteria; Bacillati; Bacillota; Negativicutes; Selenomonadales; Sporomusaceae
JCM 31403	Megasphaera hexanoica	37	32.68	38.2	Bacteria; Bacillati; Bacillota; Negativicutes; Veillonellales; Veillonellaceae
JCM 13344	Syntrophomonas erecta subsp. sporosyntropha	37	42.56	47.5	Bacteria; Bacillati; Bacillota; Syntrophomonadia; Syntrophomonadales; Syntrophomonadaceae
JCM 17260	Thermosyntropha tengcongensis	60	60.36	62.9	Bacteria; Bacillati; Bacillota; Syntrophomonadia; Syntrophomonadales; Syntrophomonadaceae
JCM 13210	Thermaerobacter litoralis	70	60.9	58.7	Bacteria; Bacillati; Bacillota; Thermaerobacteria; Thermaerobacterales; Thermaerobacteraceae
JCM 11223	Thermaerobacter nagasakiensis	70	59.92	57.5	Bacteria; Bacillati; Bacillota; Thermaerobacteria; Thermaerobacterales; Thermaerobacteraceae
JCM 17239	Anaerosalibacter bizertensis	40	45.82	49.3	Bacteria; Bacillati; Bacillota; Tissierellia; Tissierellales; Sporanaerobacteraceae
JCM 30480	Brassicibacter thermophilus	55	50.99	50.1	Bacteria; Bacillati; Bacillota; Tissierellia; Tissierellales; Thermohalobacteraceae
JCM 16120	Caldilinea tarbellica	55	54.35	52.2	Bacteria; Bacillati; Chloroflexota; Caldilineae; Caldilineales; Caldilineaceae
JCM 9492	Aquifex pyrophilus	85	81.86	86.4	Bacteria; Pseudomonadati; Aquificota; Aquificia; Aquificales; Aquificaceae
JCM 13302	Hydrogenivirga okinawensis	70–75	84.9	81.6	Bacteria; Pseudomonadati; Aquificota; Aquificia; Aquificales; Aquificaceae
JCM 10560	Hydrogenobacter subterraneus	78	78.78	80.2	Bacteria; Pseudomonadati; Aquificota; Aquificia; Aquificales; Aquificaceae
JCM 8795	Hydrogenobaculum acidophilum	65	58.75	59.2	Bacteria; Pseudomonadati; Aquificota; Aquificia; Aquificales; Aquificaceae
JCM 12825	Desulfurobacterium crinifex	60–65	73.9	71.3	Bacteria; Pseudomonadati; Aquificota; Aquificia; Desulfurobacteriales; Desulfurobacteriaceae
JCM 12127	Desulfurobacterium pacificum	75	70.68	71.7	Bacteria; Pseudomonadati; Aquificota; Aquificia; Desulfurobacteriales; Desulfurobacteriaceae
JCM 11468	Thermovibrio ruber	75	73.09	72.3	Bacteria; Pseudomonadati; Aquificota; Aquificia; Desulfurobacteriales; Desulfurobacteriaceae
JCM 14244	Venenivibrio stagnispumantis	70	63.95	72	Bacteria; Pseudomonadati; Aquificota; Aquificia; Hydrogenothermales; Hydrogenothermaceae
JCM 10556	Bacteroides acidifaciens	37	37.15	38.7	Bacteria; Pseudomonadati; Bacteroidota; Bacteroidia; Bacteroidales; Bacteroidaceae
JCM 12987	Bacteroides nordii	37	36.6	35.3	Bacteria; Pseudomonadati; Bacteroidota; Bacteroidia; Bacteroidales; Bacteroidaceae
JCM 6294	Bacteroides pyogenes	37	36.58	38	Bacteria; Pseudomonadati; Bacteroidota; Bacteroidia; Bacteroidales; Bacteroidaceae
JCM 10512	Bacteroides reticulotermitis	37	34.36	34.3	Bacteria; Pseudomonadati; Bacteroidota; Bacteroidia; Bacteroidales; Bacteroidaceae
JCM 16496	Bacteroides rodentium	37	37.27	36.9	Bacteria; Pseudomonadati; Bacteroidota; Bacteroidia; Bacteroidales; Bacteroidaceae
JCM 15092	Phocaeicola paurosaccharolyticus	35	33.78	36.8	Bacteria; Pseudomonadati; Bacteroidota; Bacteroidia; Bacteroidales; Bacteroidaceae
JCM 17136	Phocaeicola sartorii	37	36.31	38	Bacteria; Pseudomonadati; Bacteroidota; Bacteroidia; Bacteroidales; Bacteroidaceae
JCM 30204	Dysgonomonas termitidis	30	37.63	36.3	Bacteria; Pseudomonadati; Bacteroidota; Bacteroidia; Bacteroidales; Dysgonomonadaceae
JCM 12565	Petrimonas sulfuriphila	37–40	33.13	34.1	Bacteria; Pseudomonadati; Bacteroidota; Bacteroidia; Bacteroidales; Dysgonomonadaceae
JCM 15907	Porphyromonas gingivicanis	37	36.02	36.1	Bacteria; Pseudomonadati; Bacteroidota; Bacteroidia; Bacteroidales; Porphyromonadaceae
JCM 17484	Hoylesella saccharolytica	35	36.18	33.8	Bacteria; Pseudomonadati; Bacteroidota; Bacteroidia; Bacteroidales; Prevotellaceae
JCM 15640	Hoylesella timonensis	37	35.2	36.4	Bacteria; Pseudomonadati; Bacteroidota; Bacteroidia; Bacteroidales; Prevotellaceae
JCM 15754	Prevotella aurantiaca	37	36.01	35	Bacteria; Pseudomonadati; Bacteroidota; Bacteroidia; Bacteroidales; Prevotellaceae
JCM 15908	Prevotella dentasini	37	37.26	35.5	Bacteria; Pseudomonadati; Bacteroidota; Bacteroidia; Bacteroidales; Prevotellaceae
JCM 13449	Prevotella denticola	37	36.71	35.4	Bacteria; Pseudomonadati; Bacteroidota; Bacteroidia; Bacteroidales; Prevotellaceae
JCM 15124	Prevotella falsenii	37	37.41	35.1	Bacteria; Pseudomonadati; Bacteroidota; Bacteroidia; Bacteroidales; Prevotellaceae
JCM 17724	Prevotella fusca	37	37.27	36.6	Bacteria; Pseudomonadati; Bacteroidota; Bacteroidia; Bacteroidales; Prevotellaceae
JCM 15637	Prevotella histicola	37	36.13	35.9	Bacteria; Pseudomonadati; Bacteroidota; Bacteroidia; Bacteroidales; Prevotellaceae
JCM 17725	Prevotella scopos	37	36.07	34.3	Bacteria; Pseudomonadati; Bacteroidota; Bacteroidia; Bacteroidales; Prevotellaceae
JCM 15579	Marinifilum fragile	33	29.66	33	Bacteria; Pseudomonadati; Bacteroidota; Bacteroidia; Marinilabiliales; Marinifilaceae
JCM 15548	Geofilum rubicundum	33	31.52	30.7	Bacteria; Pseudomonadati; Bacteroidota; Bacteroidia; Marinilabiliales; Marinilabiliaceae
JCM 15069	Lutaonella thermophila	40–45	30.99	31.5	Bacteria; Pseudomonadati; Bacteroidota; Flavobacteriia; Flavobacteriales; Flavobacteriaceae
JCM 15747	Thiofractor thiocamini	37	40.08	45.5	Bacteria; Pseudomonadati; Campylobacterota; Epsilonproteobacteria; Campylobacterales
JCM 19824	Sulfurovum aggregans	33	27.78	34.8	Bacteria; Pseudomonadati; Campylobacterota; Epsilonproteobacteria; Campylobacterales; Sulfurovaceae
JCM 11957	Caminibacter profundus	55	52.16	63.6	Bacteria; Pseudomonadati; Campylobacterota; Epsilonproteobacteria; Nautiliales; Nautiliaceae
JCM 15390	Nautilia abyssi	60	48.91	55.7	Bacteria; Pseudomonadati; Campylobacterota; Epsilonproteobacteria; Nautiliales; Nautiliaceae
JCM 15786	Nautilia lithotrophica	53	48.61	58.3	Bacteria; Pseudomonadati; Campylobacterota; Epsilonproteobacteria; Nautiliales; Nautiliaceae
JCM 12457	Thioreductor micantisoli	32	36.67	45.3	Bacteria; Pseudomonadati; Campylobacterota; Epsilonproteobacteria; Nautiliales; Thioreductoraceae
JCM 15827	Desulfurispirillum alkaliphilum	35	28.18	34	Bacteria; Pseudomonadati; Chrysiogenota; Chrysiogenia; Chrysiogenales; Chrysiogenaceae
JCM 17152	Oligosphaera ethanolica	37	28.86	33.6	Bacteria; Pseudomonadati; Lentisphaerota; Oligosphaeria; Oligosphaerales; Oligosphaeraceae
JCM 13213	Thermodesulfovibrio aggregans	55–60	63.47	72.9	Bacteria; Pseudomonadati; Nitrospirota; Thermodesulfovibrionia; Thermodesulfovibrionales; Thermodesulfovibrionaceae
JCM 13991	Thermodesulfovibrio hydrogeniphilus	65	64.55	68.9	Bacteria; Pseudomonadati; Nitrospirota; Thermodesulfovibrionia; Thermodesulfovibrionales; Thermodesulfovibrionaceae
JCM 17478	Thermopirellula anaerolimosa	45	39.89	41.7	Bacteria; Pseudomonadati; Planctomycetota; Planctomycetia
JCM 19991	Thermogutta hypogea	52	42.03	42.5	Bacteria; Pseudomonadati; Planctomycetota; Planctomycetia; Pirellulales; Thermoguttaceae
JCM 19992	Thermostilla marina	55	40.95	42.7	Bacteria; Pseudomonadati; Planctomycetota; Planctomycetia; Pirellulales; Thermoguttaceae
JCM 25146	Acetobacter okinawensis	30	28.62	26.5	Bacteria; Pseudomonadati; Pseudomonadota; Alphaproteobacteria; Acetobacterales; Acetobacteraceae
JCM 25330	Acetobacter persici	30	26.73	24.9	Bacteria; Pseudomonadati; Pseudomonadota; Alphaproteobacteria; Acetobacterales; Acetobacteraceae
JCM 15831	Asaia astilbis	30	27.6	24	Bacteria; Pseudomonadati; Pseudomonadota; Alphaproteobacteria; Acetobacterales; Acetobacteraceae
JCM 25414	Asaia platycodi	30	28.48	23.8	Bacteria; Pseudomonadati; Pseudomonadota; Alphaproteobacteria; Acetobacterales; Acetobacteraceae
JCM 25354	Asaia prunellae	30	28.57	23.4	Bacteria; Pseudomonadati; Pseudomonadota; Alphaproteobacteria; Acetobacterales; Acetobacteraceae
JCM 25156	Komagataeibacter kakiaceti	30	30.07	29.7	Bacteria; Pseudomonadati; Pseudomonadota; Alphaproteobacteria; Acetobacterales; Acetobacteraceae
JCM 16408	Methylobacterium phyllosphaerae	28	27.04	28	Bacteria; Pseudomonadati; Pseudomonadota; Alphaproteobacteria; Hyphomicrobiales; Methylobacteriaceae
JCM 2811	Methylorubrum rhodinum	30	27.89	28.9	Bacteria; Pseudomonadati; Pseudomonadota; Alphaproteobacteria; Hyphomicrobiales; Methylobacteriaceae
JCM 10893	Methylorubrum thiocyanatum	30–37	28.57	28	Bacteria; Pseudomonadati; Pseudomonadota; Alphaproteobacteria; Hyphomicrobiales; Methylobacteriaceae
JCM 21793	Nitratireductor aquibiodomus	30–35	29.67	31.1	Bacteria; Pseudomonadati; Pseudomonadota; Alphaproteobacteria; Hyphomicrobiales; Phyllobacteriaceae
JCM 30711	Micropepsis pineolensis	35	28.94	26.9	Bacteria; Pseudomonadati; Pseudomonadota; Alphaproteobacteria; Micropepsales; Micropepsaceae
JCM 14636	Piezobacter thermophilus	50	35.28	36.8	Bacteria; Pseudomonadati; Pseudomonadota; Alphaproteobacteria; Rhodobacterales; Paracoccaceae
JCM 21060	Rhodocista centenaria	39–45	31.69	32.8	Bacteria; Pseudomonadati; Pseudomonadota; Alphaproteobacteria; Rhodospirillales; Azospirillaceae
JCM 19705	Fodinicurvata halophila	37	28.18	31.7	Bacteria; Pseudomonadati; Pseudomonadota; Alphaproteobacteria; Rhodospirillales; Fodinicurvataceae
JCM 17960	Magnetospira thiophila	24–26	27.84	29.7	Bacteria; Pseudomonadati; Pseudomonadota; Alphaproteobacteria; Rhodospirillales; Magnetospiraceae
JCM 23214	Sneathiella glossodoripedis	40	25.78	26.1	Bacteria; Pseudomonadati; Pseudomonadota; Alphaproteobacteria; Sneathiellales; Sneathiellaceae
JCM 12421	Thiobacter subterraneus	50–55	45.33	49.2	Bacteria; Pseudomonadati; Pseudomonadota; Betaproteobacteria; Burkholderiales
JCM 16107	Thiomonas islandica	45	35.07	30.7	Bacteria; Pseudomonadati; Pseudomonadota; Betaproteobacteria; Burkholderiales
JCM 10599	Paraburkholderia kururiensis	37	29.42	30.1	Bacteria; Pseudomonadati; Pseudomonadota; Betaproteobacteria; Burkholderiales; Burkholderiaceae
JCM 12992	Neisseria mucosa	30	35.03	32.9	Bacteria; Pseudomonadati; Pseudomonadota; Betaproteobacteria; Neisseriales; Neisseriaceae
JCM 2850	Methylobacillus glycogenes	20–30	29.02	27.3	Bacteria; Pseudomonadati; Pseudomonadota; Betaproteobacteria; Nitrosomonadales; Methylophilaceae
JCM 15047	Thiobacillus thiophilus	25–30	29.65	33.6	Bacteria; Pseudomonadati; Pseudomonadota; Betaproteobacteria; Nitrosomonadales; Thiobacillaceae
JCM 14267	Alkalimonas collagenimarina	33	25.64	30.7	Bacteria; Pseudomonadati; Pseudomonadota; Gammaproteobacteria
JCM 15074	Shewanella marina	30	28.65	25.2	Bacteria; Pseudomonadati; Pseudomonadota; Gammaproteobacteria; Alteromonadales; Shewanellaceae
JCM 17961	Endothiovibrio diazotrophicus	28	32.4	38.9	Bacteria; Pseudomonadati; Pseudomonadota; Gammaproteobacteria; Chromatiales; Thioalkalispiraceae
JCM 14586	Thioprofundum lithotrophicum	50	41.29	48.6	Bacteria; Pseudomonadati; Pseudomonadota; Gammaproteobacteria; Chromatiales; Thioprofundaceae
JCM 19379	Methyloparacoccus murrellii	25–33	30.72	32.7	Bacteria; Pseudomonadati; Pseudomonadota; Gammaproteobacteria; Methylococcales; Methylococcaceae
JCM 14076	Methylosoma difficile	25	26.67	29	Bacteria; Pseudomonadati; Pseudomonadota; Gammaproteobacteria; Methylococcales; Methylococcaceae
JCM 13664	Methylothermus subterraneus	55–60	51.56	59.7	Bacteria; Pseudomonadati; Pseudomonadota; Gammaproteobacteria; Methylococcales; Methylothermaceae
JCM 16084	Halomonas beimenensis	40	29.7	31.4	Bacteria; Pseudomonadati; Pseudomonadota; Gammaproteobacteria; Oceanospirillales; Halomonadaceae
JCM 16914	Halomonas cibimaris	25–30	29.58	30.5	Bacteria; Pseudomonadati; Pseudomonadota; Gammaproteobacteria; Oceanospirillales; Halomonadaceae
JCM 30151	Halomonas garicola	30	30.74	30.7	Bacteria; Pseudomonadati; Pseudomonadota; Gammaproteobacteria; Oceanospirillales; Halomonadaceae
JCM 14803	Halomonas salifodinae	30	29.94	31.9	Bacteria; Pseudomonadati; Pseudomonadota; Gammaproteobacteria; Oceanospirillales; Halomonadaceae
JCM 21221	Halomonas salina	32	30.1	31.4	Bacteria; Pseudomonadati; Pseudomonadota; Gammaproteobacteria; Oceanospirillales; Halomonadaceae
JCM 19368	Halomonas shantousis	37	29.83	31.1	Bacteria; Pseudomonadati; Pseudomonadota; Gammaproteobacteria; Oceanospirillales; Halomonadaceae
JCM 20774	Marinomonas vaga	25	27.6	25.5	Bacteria; Pseudomonadati; Pseudomonadota; Gammaproteobacteria; Oceanospirillales; Oceanospirillaceae
JCM 12291	Marinobacter alkaliphilus	30–35	28.67	33.6	Bacteria; Pseudomonadati; Pseudomonadota; Gammaproteobacteria; Pseudomonadales; Marinobacteraceae
JCM 21475	Azotobacter vinelandii	28	30.38	31	Bacteria; Pseudomonadati; Pseudomonadota; Gammaproteobacteria; Pseudomonadales; Pseudomonadaceae
JCM 15514	Salinisphaera hydrothermalis	30–35	29.29	32.4	Bacteria; Pseudomonadati; Pseudomonadota; Gammaproteobacteria; Salinisphaerales; Salinisphaeraceae
JCM 17795	Galenea microaerophila	35	35.45	43.7	Bacteria; Pseudomonadati; Pseudomonadota; Gammaproteobacteria; Thiotrichales; Piscirickettsiaceae
JCM 12397	Hydrogenovibrio thermophilus	35–40	27.42	32.7	Bacteria; Pseudomonadati; Pseudomonadota; Gammaproteobacteria; Thiotrichales; Piscirickettsiaceae
JCM 30760	Thiomicrorhabdus hydrogeniphila	30	21.76	28.2	Bacteria; Pseudomonadati; Pseudomonadota; Gammaproteobacteria; Thiotrichales; Piscirickettsiaceae
JCM 10831	Hydrogenophilus hirschii	63	50.47	56	Bacteria; Pseudomonadati; Pseudomonadota; Hydrogenophilia; Hydrogenophilales; Hydrogenophilaceae
JCM 16106	Hydrogenophilus islandicus	55	55.23	59	Bacteria; Pseudomonadati; Pseudomonadota; Hydrogenophilia; Hydrogenophilales; Hydrogenophilaceae
JCM 31343	Longimonas haloalkaliphila	37	37.81	40.6	Bacteria; Pseudomonadati; Rhodothermota; Rhodothermia; Rhodothermales; Salinibacteraceae
JCM 31342	Natronotalea proteinilytica	37	38.16	44	Bacteria; Pseudomonadati; Rhodothermota; Rhodothermia; Rhodothermales; Salisaetaceae
JCM 14728	Exilispira thermophila	50	46.59	60.2	Bacteria; Pseudomonadati; Spirochaetota; Spirochaetia; Spirochaetales
JCM 31475	Pleomorphochaeta caudata	37	32.69	30.9	Bacteria; Pseudomonadati; Spirochaetota; Spirochaetia; Spirochaetales; Sphaerochaetaceae
JCM 31871	Pleomorphochaeta naphthae	37	32.27	28.6	Bacteria; Pseudomonadati; Spirochaetota; Spirochaetia; Spirochaetales; Sphaerochaetaceae
JCM 12856	Spirochaeta dissipatitropha	35	32.74	30	Bacteria; Pseudomonadati; Spirochaetota; Spirochaetia; Spirochaetales; Spirochaetaceae
JCM 30394	Deferrisoma palaeochoriense	60	52.09	58	Bacteria; Pseudomonadati; Thermodesulfobacteriota; Deferrisomatia; Deferrisomatales; Deferrisomataceae
JCM 19179	Desulfatiglans parachlorophenolica	30	36.27	40	Bacteria; Pseudomonadati; Thermodesulfobacteriota; Desulfobacteria; Desulfatiglandales; Desulfatiglandaceae
JCM 14469	Desulfatiferula olefinivorans	30–36	27.8	28.5	Bacteria; Pseudomonadati; Thermodesulfobacteriota; Desulfobacteria; Desulfobacterales; Desulfobacteraceae
JCM 12294	Desulfocicer niacini	29	25.52	26.4	Bacteria; Pseudomonadati; Thermodesulfobacteriota; Desulfobacteria; Desulfobacterales; Desulfobacteraceae
JCM 16085	Desulfoconvexum algidum	14–16	22.19	27.6	Bacteria; Pseudomonadati; Thermodesulfobacteriota; Desulfobacteria; Desulfobacterales; Desulfobacteraceae
JCM 12296	Desulfosarcina cetonica	30	32.74	32.5	Bacteria; Pseudomonadati; Thermodesulfobacteriota; Desulfobacteria; Desulfobacterales; Desulfosarcinaceae
JCM 39068	Desulfocastanea catecholica	28	29.05	29.7	Bacteria; Pseudomonadati; Thermodesulfobacteriota; Desulfobulbia; Desulfobulbales; Desulfobulbaceae
JCM 19994	Desulfogranum aggregans	35	32.74	32	Bacteria; Pseudomonadati; Thermodesulfobacteriota; Desulfobulbia; Desulfobulbales; Desulfobulbaceae
JCM 14714	Desulfomicrobium aestuarii	35	30.55	31.7	Bacteria; Pseudomonadati; Thermodesulfobacteriota; Desulfovibrionia; Desulfovibrionales; Desulfomicrobiaceae
JCM 14713	Desulfomicrobium salsuginis	35	29.71	31.3	Bacteria; Pseudomonadati; Thermodesulfobacteriota; Desulfovibrionia; Desulfovibrionales; Desulfomicrobiaceae
JCM 31598	Desulfonatronum parangueonense	35	31.2	35.5	Bacteria; Pseudomonadati; Thermodesulfobacteriota; Desulfovibrionia; Desulfovibrionales; Desulfonatronaceae
JCM 13028	Desulfonauticus autotrophicus	58	49.98	58.2	Bacteria; Pseudomonadati; Thermodesulfobacteriota; Desulfovibrionia; Desulfovibrionales; Desulfonauticaceae
JCM 12298	Desulfothermus naphthae	55–65	59.07	64.6	Bacteria; Pseudomonadati; Thermodesulfobacteriota; Desulfovibrionia; Desulfovibrionales; Desulfothermaceae
JCM 13304	Desulfothermus okinawensis	50	58.56	60.7	Bacteria; Pseudomonadati; Thermodesulfobacteriota; Desulfovibrionia; Desulfovibrionales; Desulfothermaceae
JCM 16814	Desulfobaculum senezii	37	32.99	33	Bacteria; Pseudomonadati; Thermodesulfobacteriota; Desulfovibrionia; Desulfovibrionales; Desulfovibrionaceae
JCM 18546	Desulfocurvus thunnarius	40	35.68	32.8	Bacteria; Pseudomonadati; Thermodesulfobacteriota; Desulfovibrionia; Desulfovibrionales; Desulfovibrionaceae
JCM 30146	Desulfovibrio biadhensis	37	28.15	34	Bacteria; Pseudomonadati; Thermodesulfobacteriota; Desulfovibrionia; Desulfovibrionales; Desulfovibrionaceae
JCM 12178	Desulfovibrio brasiliensis	33	30.88	34.8	Bacteria; Pseudomonadati; Thermodesulfobacteriota; Desulfovibrionia; Desulfovibrionales; Desulfovibrionaceae
JCM 16812	Desulfovibrio simplex	37	32.71	29	Bacteria; Pseudomonadati; Thermodesulfobacteriota; Desulfovibrionia; Desulfovibrionales; Desulfovibrionaceae
JCM 15519	Fundidesulfovibrio butyratiphilus	35	32.8	27.3	Bacteria; Pseudomonadati; Thermodesulfobacteriota; Desulfovibrionia; Desulfovibrionales; Desulfovibrionaceae
JCM 15971	Halodesulfovibrio oceani subsp. galateae	20	27.66	30.1	Bacteria; Pseudomonadati; Thermodesulfobacteriota; Desulfovibrionia; Desulfovibrionales; Desulfovibrionaceae
JCM 15970	Halodesulfovibrio oceani subsp. oceani	20	28.08	30.1	Bacteria; Pseudomonadati; Thermodesulfobacteriota; Desulfovibrionia; Desulfovibrionales; Desulfovibrionaceae
JCM 14124	Humidesulfovibrio idahonensis	28	31.4	31.5	Bacteria; Pseudomonadati; Thermodesulfobacteriota; Desulfovibrionia; Desulfovibrionales; Desulfovibrionaceae
JCM 31065	Maridesulfovibrio salinus	40	31.95	32.6	Bacteria; Pseudomonadati; Thermodesulfobacteriota; Desulfovibrionia; Desulfovibrionales; Desulfovibrionaceae
JCM 14635	Megalodesulfovibrio paquesii	37	31.66	33	Bacteria; Pseudomonadati; Thermodesulfobacteriota; Desulfovibrionia; Desulfovibrionales; Desulfovibrionaceae
JCM 14040	Oceanidesulfovibrio marinus	37	32.57	36	Bacteria; Pseudomonadati; Thermodesulfobacteriota; Desulfovibrionia; Desulfovibrionales; Desulfovibrionaceae
JCM 15785	Oleidesulfovibrio vietnamensis	30	32.45	33.2	Bacteria; Pseudomonadati; Thermodesulfobacteriota; Desulfovibrionia; Desulfovibrionales; Desulfovibrionaceae
JCM 30471	Desulfuromonas carbonis	25–37	29.82	36.3	Bacteria; Pseudomonadati; Thermodesulfobacteriota; Desulfuromonadia; Desulfuromonadales; Desulfuromonadaceae
JCM 12927	Desulfuromonas svalbardensis	14	24.48	29.4	Bacteria; Pseudomonadati; Thermodesulfobacteriota; Desulfuromonadia; Desulfuromonadales; Desulfuromonadaceae
JCM 12926	Desulfuromusa ferrireducens	14–17	25.58	30.4	Bacteria; Pseudomonadati; Thermodesulfobacteriota; Desulfuromonadia; Desulfuromonadales; Desulfuromonadaceae
JCM 15764	Geotalea toluenoxydans	25–32	29.41	32.8	Bacteria; Pseudomonadati; Thermodesulfobacteriota; Desulfuromonadia; Geobacterales; Geobacteraceae
JCM 16410	Desulfosoma profundi	55	52.19	50.2	Bacteria; Pseudomonadati; Thermodesulfobacteriota; Syntrophobacteria; Syntrophobacterales; Syntrophobacteraceae
JCM 14805	Prosthecobacter fluviatilis	30	24.61	23.4	Bacteria; Pseudomonadati; Verrucomicrobiota; Verrucomicrobiia; Verrucomicrobiales; Verrucomicrobiaceae
JCM 15963	Rhabdothermus arcticus	65	67.48	67.4	Bacteria; Thermotogati; Deinococcota; Deinococci; Thermales; Thermaceae
JCM 11602	Thermus brockianus	70	68.08	67.3	Bacteria; Thermotogati; Deinococcota; Deinococci; Thermales; Thermaceae
JCM 12314	Thermus kawarayensis	68	65.88	67.4	Bacteria; Thermotogati; Deinococcota; Deinococci; Thermales; Thermaceae
JCM 11956	Vulcanithermus mediatlanticus	70	62.86	66.4	Bacteria; Thermotogati; Deinococcota; Deinococci; Thermales; Thermaceae
JCM 19320	Aminobacterium thunnarium	40	36.12	37.6	Bacteria; Thermotogati; Synergistota; Synergistia; Synergistales; Aminobacteriaceae
JCM 17151	Lactivibrio alcoholicus	37	34.59	38.3	Bacteria; Thermotogati; Synergistota; Synergistia; Synergistales; Aminobacteriaceae
JCM 18154	Mesotoga infera	45	43.32	47.7	Bacteria; Thermotogati; Thermotogota; Thermotogae; Kosmotogales; Kosmotogaceae
JCM 17210	Defluviitoga tunisiensis	55	56.12	55.6	Bacteria; Thermotogati; Thermotogota; Thermotogae; Petrotogales; Petrotogaceae
JCM 30566	Marinitoga arctica	65	59.62	59.3	Bacteria; Thermotogati; Thermotogota; Thermotogae; Petrotogales; Petrotogaceae
JCM 13303	Marinitoga okinawensis	55–60	59.78	60.5	Bacteria; Thermotogati; Thermotogota; Thermotogae; Petrotogales; Petrotogaceae
