# Supplementary material
Source: HighWire-hosted journal article supplement (doi:10.1101/gr.281026.125)
Supplement: Supplemental_Table_S5.xlsx [file Supplemental_Table_S5.xlsx]

## Sheet: TableS5
Supplemental Table S5. Gene context in the 351 genomes determined in this study.
			Metabolic reaction (METABOLIC and KEGG)
			rgy	4-aminobutyrate aminotransferase and related aminotransferases	aminotransferase class I and II	phosphoserine aminotransferase	ornithine/acetylornithine aminotransferase	branched-chain amino acid aminotransferase/4-amino-4-deoxychorismate lyase	aspartate/tyrosine/aromatic aminotransferase	histidinol-phosphate/aromatic aminotransferase	serine-pyruvate aminotransferase/archaeal aspartate aminotransferase	acetate => acetaldehyde	acetaldehyde => ethanol	acyl-CoA dehydrogenase	catA	ubiX	bsdC	bcrC	bcrB	bcrA	bcrD	cellobiosidase	cellulase	beta-glucosidase	arabinosidase	beta-glucuronidase	alpha-L-rhamnosidase	mannan endo-1,4-beta-mannosidase	alpha-D-xyloside xylohydrolase	beta-xylosidase	beta-mannosidase	beta-galactosidase	alpha-amylase	glucoamylase	pullulanase	isoamylase	chitiniase	hexosaminidase	porA	adh	ldh	acdA	ack	pta	acs	pflD	mxaF	mdh	mauA
JCM number	Scientific name	Taxonomy (ICNP-based)	K03170	K00823, K07250, K13524, K14268, K03918	K05825	K00831	K00819, K00821, K05830, K00840	K00826, K02619, K03342	K00812, K00813, K11358, K00832	K00817	K00830	K00129, K00138	K13954, K00001, K04072, K00114, K00002, K04022, K22473	K00249, K00255, K06445, K06446, K09456, K09478, K11410, K15980, K18244	K03381	K03186	K01612	K04112	K04113	K04114	K04115	K19668	K01179, K20542	K01188, K05349, K05350	K01209, K15921	K01195	K05989	K01218, K19355	K01811	K01198	K01192	K01190, K12111, K12308	K01176, K05343, K07405	K01178	K01200	K01214	K01183, K13381	K01207, K12373, K14459	K00169	K00001	K00016	K01905	K00925	K00625	K01895	K00656	K14028	K00093	K15228
JCM 15760	Haloarcula argentinensis	Archaea; Methanobacteriati; Halobacteriota; Halobacteria; Halobacteriales; Haloarculaceae	0	0	0	0	1	1	1	1	1	0	0	6	0	0	0	0	0	0	0	0	0	1	0	0	0	0	0	0	0	0	2	2	0	0	0	1	1	0	0	1	0	1	2	0	0	0	0
JCM 17269	Halovenus rubra	Archaea; Methanobacteriati; Halobacteriota; Halobacteria; Halobacteriales; Haloarculaceae	0	0	1	0	2	2	1	1	0	0	0	3	0	0	0	0	0	0	0	0	0	0	0	0	0	0	0	0	0	0	0	0	0	0	0	0	1	0	0	1	0	1	1	0	0	0	0
JCM 19908	Halobacterium rubrum	Archaea; Methanobacteriati; Halobacteriota; Halobacteria; Halobacteriales; Halobacteriaceae	0	0	0	0	1	1	1	1	1	0	0	5	0	0	0	0	0	0	0	0	0	0	0	0	0	0	0	0	0	0	0	0	0	0	0	0	1	0	0	1	0	1	2	0	0	0	0
JCM 11890	Halalkalicoccus tibetensis	Archaea; Methanobacteriati; Halobacteriota; Halobacteria; Halobacteriales; Halococcaceae	0	0	0	0	3	1	1	1	1	0	0	4	0	0	0	0	0	0	0	0	1	3	0	0	5	1	0	1	0	1	0	1	0	0	0	0	1	0	0	1	0	2	2	0	0	0	0
JCM 30029	Halobium salinum	Archaea; Methanobacteriati; Halobacteriota; Halobacteria; Halobacteriales; Haloferacaceae	0	0	0	0	1	3	1	1	1	0	0	6	0	0	0	0	0	0	0	0	0	2	0	0	0	0	0	0	0	0	1	2	0	0	0	0	1	0	0	1	0	1	1	0	0	0	0
JCM 30237	Halolamina litorea	Archaea; Methanobacteriati; Halobacteriota; Halobacteria; Halobacteriales; Haloferacaceae	0	0	1	0	1	3	1	1	1	0	0	4	0	0	0	0	0	0	0	0	0	0	0	0	0	0	0	0	0	0	0	0	0	0	0	0	1	0	0	1	1	2	1	0	0	0	0
JCM 18549	Halolamina salina	Archaea; Methanobacteriati; Halobacteriota; Halobacteria; Halobacteriales; Haloferacaceae	0	0	1	0	1	3	1	1	0	0	0	4	0	0	0	0	0	0	0	0	0	0	0	0	0	0	0	0	0	0	0	0	0	0	0	0	1	0	0	1	0	1	3	0	0	0	0
JCM 30442	Haloparvum alkalitolerans	Archaea; Methanobacteriati; Halobacteriota; Halobacteria; Halobacteriales; Haloferacaceae	0	0	0	0	1	3	1	1	1	0	0	5	0	0	0	0	0	0	0	0	0	0	0	1	0	0	0	0	0	0	0	1	0	0	0	0	1	0	0	1	0	1	2	0	0	0	0
JCM 17506	Halopelagius fulvigenes	Archaea; Methanobacteriati; Halobacteriota; Halobacteria; Halobacteriales; Haloferacaceae	0	0	0	0	1	3	1	1	1	0	0	3	0	0	0	0	0	0	0	0	0	5	2	0	1	0	0	1	0	4	1	2	0	0	0	1	1	0	0	1	0	2	1	0	0	0	0
JCM 18641	Halopenitus salinus	Archaea; Methanobacteriati; Halobacteriota; Halobacteria; Halobacteriales; Haloferacaceae	0	0	0	0	1	2	1	1	1	0	0	3	0	0	0	0	0	0	0	0	0	0	0	0	0	0	0	0	0	0	0	0	0	0	0	0	2	0	0	1	0	1	1	0	0	0	0
JCM 17092	Haloplanus litoreus	Archaea; Methanobacteriati; Halobacteriota; Halobacteria; Halobacteriales; Haloferacaceae	0	0	0	0	1	2	1	1	1	0	0	1	0	0	0	0	0	0	0	0	0	0	0	0	0	0	0	0	0	0	0	0	0	0	0	0	1	0	0	1	0	2	1	0	0	0	0
JCM 14265	Halorubrum ejinorense	Archaea; Methanobacteriati; Halobacteriota; Halobacteria; Halobacteriales; Haloferacaceae	0	0	1	0	1	3	0	1	1	0	0	4	0	0	0	0	0	0	0	0	0	2	0	0	0	0	0	0	0	0	0	2	0	0	0	0	1	0	0	1	0	1	2	0	0	0	0
JCM 17823	Halorubrum gandharaense	Archaea; Methanobacteriati; Halobacteriota; Halobacteria; Halobacteriales; Haloferacaceae	0	0	0	0	1	3	1	1	1	0	0	3	0	0	0	0	0	0	0	0	0	2	0	0	0	0	0	1	1	0	0	2	0	0	0	1	1	0	0	1	0	1	2	0	0	0	0
JCM 18237	Halorubrum luteum	Archaea; Methanobacteriati; Halobacteriota; Halobacteria; Halobacteriales; Haloferacaceae	0	0	0	0	1	3	1	1	1	0	0	4	0	0	0	0	0	0	0	0	0	1	0	0	0	0	0	0	0	0	1	2	0	0	0	0	1	0	0	1	0	1	1	0	0	0	0
JCM 30955	Halorubrum pallidum	Archaea; Methanobacteriati; Halobacteriota; Halobacteria; Halobacteriales; Haloferacaceae	0	0	0	0	1	3	1	1	1	0	0	2	0	0	0	0	0	0	0	0	0	0	0	0	0	0	0	0	0	0	0	1	0	0	0	0	1	0	0	1	0	1	2	0	0	0	0
JCM 11889	Halorubrum tibetense	Archaea; Methanobacteriati; Halobacteriota; Halobacteria; Halobacteriales; Haloferacaceae	0	0	0	0	1	3	1	1	1	0	0	5	0	0	0	0	0	0	0	0	0	0	0	0	0	0	0	0	0	0	0	2	0	0	0	0	1	0	0	1	0	1	2	0	0	0	0
JCM 31271	Halorubrum trueperi	Archaea; Methanobacteriati; Halobacteriota; Halobacteria; Halobacteriales; Haloferacaceae	0	0	0	0	1	2	0	1	1	0	0	4	0	0	0	0	0	0	0	0	0	0	0	0	0	1	0	0	0	0	0	1	0	0	0	0	1	0	0	1	0	1	2	0	0	0	0
JCM 30665	Halorubrum yunnanense	Archaea; Methanobacteriati; Halobacteriota; Halobacteria; Halobacteriales; Haloferacaceae	0	0	0	0	1	3	1	1	1	0	0	6	0	0	0	0	0	0	0	0	0	0	0	0	0	0	0	0	0	0	0	2	0	0	0	0	1	0	0	1	0	1	2	0	0	0	0
JCM 18642	Haloarchaeobius amylolyticus	Archaea; Methanobacteriati; Halobacteriota; Halobacteria; Halobacteriales; Halorubellaceae	0	0	0	0	1	3	1	1	1	0	0	6	0	0	0	0	0	0	0	0	0	1	0	0	0	0	0	0	0	1	1	3	0	0	0	1	1	0	0	1	0	1	4	0	0	0	0
JCM 17117	Halorubellus litoreus	Archaea; Methanobacteriati; Halobacteriota; Halobacteria; Halobacteriales; Halorubellaceae	0	0	0	0	1	2	1	1	0	0	0	6	0	0	0	0	0	0	0	0	0	1	0	0	0	0	0	0	0	0	0	2	0	0	0	0	1	0	0	1	0	1	2	0	0	0	0
JCM 19583	Halopiger thermotolerans	Archaea; Methanobacteriati; Halobacteriota; Halobacteria; Halobacteriales; Natrialbaceae	0	0	0	0	1	3	1	1	1	0	0	4	0	0	0	0	0	0	0	0	0	3	4	0	0	0	0	0	0	2	1	1	0	0	0	0	1	0	0	1	0	2	3	0	0	0	0
JCM 16592	Halostagnicola alkaliphila	Archaea; Methanobacteriati; Halobacteriota; Halobacteria; Halobacteriales; Natrialbaceae	0	0	0	0	1	3	1	1	1	0	0	8	0	0	0	0	0	0	0	0	0	4	3	0	1	0	1	0	0	3	1	1	0	0	0	2	1	0	0	1	0	2	2	0	0	0	0
JCM 18750	Halostagnicola bangensis	Archaea; Methanobacteriati; Halobacteriota; Halobacteria; Halobacteriales; Natrialbaceae	0	0	0	0	1	2	1	3	3	0	0	7	0	0	0	0	0	0	0	0	0	3	3	0	2	0	0	0	0	3	0	1	0	0	0	1	1	0	0	1	0	2	2	0	0	0	0
JCM 9743	Natrinema sp.	Archaea; Methanobacteriati; Halobacteriota; Halobacteria; Halobacteriales; Natrialbaceae	0	0	0	0	1	2	1	1	1	0	0	6	0	0	0	0	0	0	0	0	0	0	0	0	0	0	0	0	0	0	0	0	0	0	2	1	1	0	0	1	0	3	2	0	0	0	0
JCM 31939	Natronobiforma cellulositropha	Archaea; Methanobacteriati; Halobacteriota; Halobacteria; Halobacteriales; Natrialbaceae	0	0	0	0	1	3	1	1	1	0	0	3	0	0	0	0	0	0	0	0	5	3	1	0	0	4	0	1	1	0	0	0	0	0	1	1	1	0	0	1	0	2	1	0	0	0	0
JCM 16328	Natronoarchaeum mannanilyticum	Archaea; Methanobacteriati; Halobacteriota; Halobacteria; Halobacteriales; Natronoarchaeaceae	0	0	0	0	1	2	1	1	0	0	0	5	0	0	0	0	0	0	0	0	0	2	0	1	0	1	0	0	1	4	3	2	0	0	0	0	1	0	0	1	0	1	3	0	0	0	0
JCM 19597	Salinarchaeum chitinilyticum	Archaea; Methanobacteriati; Halobacteriota; Halobacteria; Halobacteriales; Natronoarchaeaceae	0	0	0	0	1	2	1	1	1	0	0	7	0	0	0	0	0	0	0	0	0	5	0	0	0	0	0	1	1	1	0	0	0	0	2	1	1	0	0	1	0	1	1	0	0	0	0
JCM 15416	Methanobacterium flexile	Archaea; Methanobacteriati; Methanobacteriota; Methanobacteria; Methanobacteriales; Methanobacteriaceae	0	0	1	0	1	1	0	1	0	0	0	0	0	1	0	0	0	0	0	0	0	0	0	0	0	0	0	0	0	0	0	0	0	0	0	0	1	0	0	0	0	0	3	0	0	0	0
JCM 15797	Methanobacterium kanagiense	Archaea; Methanobacteriati; Methanobacteriota; Methanobacteria; Methanobacteriales; Methanobacteriaceae	0	0	1	0	1	1	0	1	1	0	0	0	0	1	0	0	0	0	0	0	0	0	0	0	0	0	0	0	0	0	0	0	0	0	0	0	1	0	0	0	0	0	2	0	0	0	0
JCM 15415	Methanobacterium movens	Archaea; Methanobacteriati; Methanobacteriota; Methanobacteria; Methanobacteriales; Methanobacteriaceae	0	0	1	0	1	1	0	1	0	0	0	0	0	1	0	0	0	0	0	0	0	0	0	0	0	0	0	0	0	0	0	0	0	0	0	0	1	0	0	0	0	0	3	0	0	0	0
JCM 18470	Methanobacterium movilense	Archaea; Methanobacteriati; Methanobacteriota; Methanobacteria; Methanobacteriales; Methanobacteriaceae	0	0	1	0	1	1	0	1	1	0	0	0	0	1	0	0	0	0	0	0	0	0	0	0	0	0	0	0	0	0	0	0	0	0	0	0	1	0	0	0	0	0	2	0	0	0	0
JCM 10723	Methanothermus sociabilis	Archaea; Methanobacteriati; Methanobacteriota; Methanobacteria; Methanobacteriales; Methanothermaceae	1	0	0	0	2	1	0	1	1	0	0	0	0	1	0	0	0	0	0	0	0	0	0	0	0	0	0	0	0	0	0	0	0	0	0	0	1	0	0	1	0	0	1	0	0	0	0
JCM 17393	Methanothermobacter crinale	Archaea; Methanobacteriati; Methanobacteriota; Methanobacteria; Methanobacteriales; Methanothermobacteraceae	0	0	0	0	1	1	1	1	1	0	0	0	0	1	0	0	0	0	0	0	0	0	0	0	0	0	0	0	0	0	0	0	0	0	0	0	1	0	0	0	0	0	2	0	0	0	0
JCM 11886	Methanocaldococcus indicus	Archaea; Methanobacteriati; Methanobacteriota; Methanococci; Methanococcales; Methanocaldococcaceae	1	0	0	0	1	1	0	1	0	0	0	0	0	1	0	0	0	0	0	0	0	0	0	0	0	0	0	0	0	0	1	1	0	0	0	0	1	0	0	1	0	0	0	0	0	0	0
JCM 10627	Methanocalculus pumilus	Archaea; Methanobacteriati; Methanobacteriota; Methanomicrobia; Methanomicrobiales; Methanocalculaceae	0	0	1	0	1	1	1	1	0	0	0	0	0	1	0	0	0	0	0	0	0	0	0	0	0	0	0	0	0	0	0	0	0	0	0	0	2	0	0	1	0	0	2	0	0	0	0
JCM 10550	Methanogenium cariaci	Archaea; Methanobacteriati; Methanobacteriota; Methanomicrobia; Methanomicrobiales; Methanomicrobiaceae	0	0	2	0	1	1	1	1	0	0	1	0	0	1	0	0	0	0	0	0	0	0	0	0	0	0	0	0	0	0	0	0	0	0	0	0	2	0	0	2	0	0	2	0	0	0	0
JCM 11281	Methanosarcina baltica	Archaea; Methanobacteriati; Methanobacteriota; Methanomicrobia; Methanosarcinales; Methanosarcinaceae	0	0	0	0	1	1	1	1	0	0	1	0	0	1	0	0	0	0	0	0	0	0	0	0	0	0	0	0	0	0	1	2	0	0	0	0	1	0	0	0	1	1	0	0	0	0	0
JCM 15540	Methanosarcina subterranea	Archaea; Methanobacteriati; Methanobacteriota; Methanomicrobia; Methanosarcinales; Methanosarcinaceae	0	0	0	1	1	1	1	1	0	0	1	0	0	1	0	0	0	0	0	0	0	0	0	0	0	0	0	0	0	0	1	2	0	0	0	0	1	0	0	0	1	1	0	0	0	0	0
JCM 13384	Palaeococcus helgesonii	Archaea; Methanobacteriati; Methanobacteriota; Thermococci; Thermococcales; Thermococcaceae	1	0	2	0	0	0	2	1	0	0	0	0	0	1	0	0	0	0	0	0	0	0	0	0	0	0	0	0	0	0	1	0	0	0	0	0	2	0	0	6	0	0	0	0	0	0	0
JCM 8421	Pyrococcus woesei	Archaea; Methanobacteriati; Methanobacteriota; Thermococci; Thermococcales; Thermococcaceae	1	0	1	0	0	0	2	1	0	0	0	0	0	1	0	0	0	0	0	0	0	0	0	0	0	0	0	0	0	0	1	0	0	0	2	0	2	0	0	5	0	0	0	0	0	0	0
JCM 10828	Thermococcus aegaeus	Archaea; Methanobacteriati; Methanobacteriota; Thermococci; Thermococcales; Thermococcaceae	1	0	2	0	0	0	2	0	0	0	0	0	0	1	0	0	0	0	0	0	0	0	0	0	0	0	0	0	0	0	0	0	0	0	0	0	2	0	0	5	0	0	0	0	0	0	0
JCM 16138	Thermococcus atlanticus	Archaea; Methanobacteriati; Methanobacteriota; Thermococci; Thermococcales; Thermococcaceae	1	0	3	0	0	0	2	1	0	0	0	0	0	1	0	0	0	0	0	0	0	0	0	0	0	0	0	0	0	0	1	0	0	0	0	0	2	0	0	4	0	0	0	0	0	0	0
JCM 12540	Thermococcus coalescens	Archaea; Methanobacteriati; Methanobacteriota; Thermococci; Thermococcales; Thermococcaceae	1	0	2	0	0	0	2	1	0	0	0	0	0	1	0	0	0	0	0	0	0	0	0	0	0	0	0	0	0	0	2	0	0	0	0	0	2	0	0	5	0	0	0	0	0	0	0
JCM 10128	Thermococcus fumicolans	Archaea; Methanobacteriati; Methanobacteriota; Thermococci; Thermococcales; Thermococcaceae	1	0	1	0	0	0	2	0	0	0	0	0	0	1	0	0	0	0	0	0	0	0	0	0	0	0	0	0	0	0	1	0	0	0	0	0	2	0	0	4	0	0	0	0	0	0	0
JCM 11825	Thermococcus marinus	Archaea; Methanobacteriati; Methanobacteriota; Thermococci; Thermococcales; Thermococcaceae	1	0	1	0	0	0	1	0	0	0	0	0	0	1	0	0	0	0	0	0	0	0	0	0	0	0	0	0	0	0	1	0	0	0	1	0	2	0	0	5	0	0	0	0	0	0	0
JCM 16307	Thermococcus prieurii	Archaea; Methanobacteriati; Methanobacteriota; Thermococci; Thermococcales; Thermococcaceae	1	0	2	0	0	0	1	1	0	0	0	0	0	1	0	0	0	0	0	0	0	0	0	0	0	0	0	0	0	0	0	0	0	0	2	0	2	0	0	5	0	0	1	0	0	0	0
JCM 11816	Thermococcus sp.	Archaea; Methanobacteriati; Methanobacteriota; Thermococci; Thermococcales; Thermococcaceae	1	0	1	0	0	0	2	1	0	0	0	0	0	1	0	0	0	0	0	0	0	0	0	0	0	0	0	0	0	0	2	0	0	0	1	0	2	0	0	5	0	0	0	0	0	0	0
JCM 10985	Thermococcus waiotapuensis	Archaea; Methanobacteriati; Methanobacteriota; Thermococci; Thermococcales; Thermococcaceae	1	0	1	0	0	0	2	0	0	0	0	0	0	1	0	0	0	0	0	0	0	0	0	0	0	0	0	0	0	0	2	0	0	0	0	0	2	0	0	5	0	0	0	0	0	0	0
JCM 13583	Thermogymnomonas acidicola	Archaea; Methanobacteriati; Thermoplasmatota; Thermoplasmata; Thermoplasmatales	0	0	2	0	0	1	0	1	0	0	0	1	0	1	0	0	0	0	0	0	0	0	0	0	0	0	0	0	0	0	1	1	0	1	0	0	1	0	0	0	0	0	1	0	0	0	0
JCM 11320	Acidilobus aceticus	Archaea; Thermoproteati; Thermoproteota; Thermoprotei; Acidilobales; Acidilobaceae	1	0	1	0	0	0	0	0	0	0	0	2	0	1	0	0	0	0	0	0	0	1	0	0	0	0	0	0	0	0	1	1	0	0	0	0	2	0	0	0	0	0	1	0	0	0	0
JCM 13516	Caldococcus noboribetus	Archaea; Thermoproteati; Thermoproteota; Thermoprotei; Desulfurococcales	1	0	1	0	0	0	0	0	0	0	0	2	0	1	0	0	0	0	0	0	0	1	0	0	0	0	0	0	0	0	1	1	0	0	0	0	2	0	0	0	0	0	1	0	0	0	0
JCM 10135	Stetteria hydrogenophila	Archaea; Thermoproteati; Thermoproteota; Thermoprotei; Desulfurococcales; Desulfurococcaceae	2	0	1	0	0	0	0	1	0	0	0	0	0	1	0	0	0	0	0	0	0	0	0	0	0	0	0	0	0	0	0	0	0	0	0	0	2	0	0	1	0	0	1	0	0	0	0
JCM 10309	Sulfophobococcus zilligii	Archaea; Thermoproteati; Thermoproteota; Thermoprotei; Desulfurococcales; Desulfurococcaceae	2	0	1	0	0	0	0	0	0	0	0	0	0	0	0	0	0	0	0	0	0	1	0	0	0	0	0	0	0	0	1	0	0	0	0	0	2	0	0	2	0	0	0	0	0	0	0
JCM 11597	Thermodiscus maritimus	Archaea; Thermoproteati; Thermoproteota; Thermoprotei; Desulfurococcales; Desulfurococcaceae	2	0	1	0	0	0	0	0	0	0	0	2	0	1	0	0	0	0	0	0	0	0	0	0	0	0	0	0	0	0	0	0	0	0	0	0	2	0	0	0	0	0	1	0	0	0	0
JCM 9392	Pyrodictium brockii	Archaea; Thermoproteati; Thermoproteota; Thermoprotei; Desulfurococcales; Pyrodictiaceae	2	0	1	0	0	0	0	1	0	0	0	0	0	1	0	0	0	0	0	0	0	0	0	0	0	0	0	0	0	0	0	0	0	0	0	0	2	0	0	1	0	0	2	0	0	0	0
JCM 10088	Thermocladium modestius	Archaea; Thermoproteati; Thermoproteota; Thermoprotei; Thermoproteales; Thermocladiaceae	1	0	1	0	0	0	0	0	0	0	0	1	0	1	0	0	0	0	0	0	0	0	0	0	0	0	0	0	0	0	1	1	0	0	0	0	2	0	0	2	0	0	1	0	0	0	0
JCM 9190	Pyrobaculum organotrophum	Archaea; Thermoproteati; Thermoproteota; Thermoprotei; Thermoproteales; Thermoproteaceae	1	0	1	0	1	0	0	0	0	0	0	2	0	1	0	0	0	0	0	0	0	0	0	0	0	0	0	0	0	0	1	0	0	0	0	0	3	0	0	0	0	0	1	0	0	0	0
JCM 17229	Thermoproteus thermophilus	Archaea; Thermoproteati; Thermoproteota; Thermoprotei; Thermoproteales; Thermoproteaceae	1	0	1	0	1	1	0	0	0	0	0	1	0	1	0	0	0	0	0	0	0	0	0	0	0	0	0	0	0	0	1	1	0	0	0	0	3	0	0	1	0	0	3	0	0	0	0
JCM 14467	Vulcanisaeta sp.	Archaea; Thermoproteati; Thermoproteota; Thermoprotei; Thermoproteales; Thermoproteaceae	1	0	1	0	1	1	0	1	0	0	0	2	0	1	0	0	0	0	0	0	0	0	0	0	0	0	0	0	0	0	1	1	0	0	0	0	4	0	0	1	0	0	1	0	0	0	0
JCM 16159	Vulcanisaeta sp.	Archaea; Thermoproteati; Thermoproteota; Thermoprotei; Thermoproteales; Thermoproteaceae	1	0	1	0	1	1	0	1	0	0	0	1	0	1	0	0	0	0	0	0	0	0	0	0	0	0	0	0	0	0	1	1	0	0	0	0	4	0	0	1	0	0	1	0	0	0	0
JCM 16161	Vulcanisaeta sp.	Archaea; Thermoproteati; Thermoproteota; Thermoprotei; Thermoproteales; Thermoproteaceae	1	0	1	0	1	1	0	1	0	0	0	1	0	1	0	0	0	0	0	0	0	0	0	0	0	0	0	0	0	0	1	1	0	0	0	0	4	0	0	1	0	0	1	0	0	0	0
JCM 1254	Bifidobacterium bifidum	Bacteria; Bacillati; Actinomycetota; Actinomycetes; Bifidobacteriales; Bifidobacteriaceae	0	0	0	1	1	2	2	1	0	0	1	0	0	0	0	0	0	0	0	0	0	0	1	0	0	0	0	0	0	5	0	0	0	2	0	5	0	0	2	0	1	1	0	1	0	0	0
JCM 1272	Bifidobacterium longum subsp. infantis	Bacteria; Bacillati; Actinomycetota; Actinomycetes; Bifidobacteriales; Bifidobacteriaceae	0	0	1	1	1	2	2	1	0	0	1	0	0	0	0	0	0	0	0	0	0	1	1	0	0	0	1	1	0	3	0	0	0	2	0	4	0	0	2	0	1	1	0	1	0	0	0
JCM 9957	Kineosporia succinea	Bacteria; Bacillati; Actinomycetota; Actinomycetes; Kineosporiales; Kineosporiaceae	0	2	1	1	1	2	0	3	0	1	2	6	0	0	0	0	0	0	0	1	1	8	3	0	2	0	1	1	2	7	4	1	0	4	3	4	0	0	0	0	1	1	1	0	1	0	0
JCM 13580	Streptomyces drozdowiczii	Bacteria; Bacillati; Actinomycetota; Actinomycetes; Kitasatosporales; Streptomycetaceae	0	1	0	1	2	5	1	4	0	0	0	13	0	1	0	0	0	0	0	1	1	12	1	0	0	0	2	3	1	4	3	0	1	2	6	9	0	0	0	0	1	1	1	0	0	0	0
JCM 12681	Streptomyces mexicanus	Bacteria; Bacillati; Actinomycetota; Actinomycetes; Kitasatosporales; Streptomycetaceae	0	1	0	1	2	3	1	4	0	1	0	11	0	4	2	0	0	0	0	1	1	7	1	0	1	0	1	1	1	4	4	0	1	3	1	6	0	0	0	1	2	1	2	0	0	1	0
JCM 4814	Streptomyces phaeofaciens	Bacteria; Bacillati; Actinomycetota; Actinomycetes; Kitasatosporales; Streptomycetaceae	0	1	2	1	3	2	1	3	0	1	0	15	0	1	0	0	0	0	0	1	1	8	2	0	2	0	2	1	1	10	5	0	1	3	2	5	0	0	0	1	1	1	1	0	0	0	0
JCM 4914	Streptomyces platensis subsp. malvinus	Bacteria; Bacillati; Actinomycetota; Actinomycetes; Kitasatosporales; Streptomycetaceae	0	1	1	1	3	1	1	3	0	1	0	12	0	1	0	0	0	0	0	0	0	3	0	0	0	0	0	0	0	4	2	0	1	2	1	5	0	0	0	0	1	1	2	0	0	0	0
JCM 18897	Streptomyces sp.	Bacteria; Bacillati; Actinomycetota; Actinomycetes; Kitasatosporales; Streptomycetaceae	0	1	1	1	2	3	1	3	0	0	0	11	0	1	0	0	0	0	0	1	0	7	0	0	0	0	0	0	0	0	2	0	1	2	3	4	0	0	0	0	1	1	1	0	0	0	0
JCM 18882	Brevibacterium metallidurans	Bacteria; Bacillati; Actinomycetota; Actinomycetes; Micrococcales; Brevibacteriaceae	0	1	0	1	1	2	0	3	0	1	0	6	1	0	0	0	0	0	0	0	0	0	0	0	0	0	0	0	0	0	0	0	0	0	0	1	0	0	0	0	0	0	1	0	0	0	0
JCM 16927	Cellulomonas chitinilytica	Bacteria; Bacillati; Actinomycetota; Actinomycetes; Micrococcales; Cellulomonadaceae	0	1	1	1	2	1	1	2	0	1	1	1	0	0	0	0	0	0	0	1	2	11	4	1	1	1	1	0	1	5	5	0	1	2	2	4	0	0	1	0	1	1	1	2	0	0	0
JCM 18110	Cellulomonas iranensis	Bacteria; Bacillati; Actinomycetota; Actinomycetes; Micrococcales; Cellulomonadaceae	0	0	1	1	2	1	1	2	0	0	1	0	0	0	0	0	0	0	0	1	1	9	4	0	0	0	2	1	1	6	3	0	1	2	1	1	0	0	1	0	1	1	2	1	0	0	0
JCM 18755	Cellulomonas pakistanensis	Bacteria; Bacillati; Actinomycetota; Actinomycetes; Micrococcales; Cellulomonadaceae	0	0	1	1	2	1	1	2	0	1	1	0	0	0	0	0	0	0	0	0	0	9	2	0	1	1	1	1	2	7	2	0	1	2	0	2	0	0	2	0	1	1	2	1	0	0	0
JCM 18111	Cellulomonas persica	Bacteria; Bacillati; Actinomycetota; Actinomycetes; Micrococcales; Cellulomonadaceae	0	0	1	1	2	1	1	2	0	1	1	0	0	0	0	0	0	0	0	1	1	4	2	0	0	1	0	1	0	1	4	0	1	2	1	2	0	0	2	0	1	1	1	1	0	0	0
JCM 9808	Cellulomonas sp.	Bacteria; Bacillati; Actinomycetota; Actinomycetes; Micrococcales; Cellulomonadaceae	0	0	1	1	2	1	0	2	0	1	1	2	0	0	0	0	0	0	0	0	0	7	2	0	0	0	2	1	0	1	4	0	1	2	3	4	0	0	2	0	1	1	1	1	0	0	0
JCM 15471	Brachybacterium zhongshanense	Bacteria; Bacillati; Actinomycetota; Actinomycetes; Micrococcales; Dermabacteraceae	0	0	1	1	1	3	1	2	1	0	1	0	0	0	0	0	0	0	0	0	0	4	2	0	2	0	1	2	2	7	4	0	1	2	0	4	0	0	1	0	1	1	1	1	0	0	0
JCM 13591	Microbacterium xylanilyticum	Bacteria; Bacillati; Actinomycetota; Actinomycetes; Micrococcales; Microbacteriaceae	0	1	0	1	2	2	1	3	0	1	0	4	0	0	0	0	0	0	0	0	0	4	1	0	1	1	0	1	1	4	3	0	0	1	0	3	0	0	0	0	1	1	1	0	0	0	0
JCM 14115	Paenarthrobacter nitroguajacolicus	Bacteria; Bacillati; Actinomycetota; Actinomycetes; Micrococcales; Micrococcaceae	0	1	1	1	1	2	1	2	1	1	0	1	1	0	0	0	0	0	0	0	0	5	2	0	4	0	0	1	0	5	3	0	0	2	0	3	0	0	0	0	0	0	1	0	0	0	0
JCM 11754	Isoptericola variabilis	Bacteria; Bacillati; Actinomycetota; Actinomycetes; Micrococcales; Promicromonosporaceae	0	1	0	1	1	1	0	2	0	1	0	3	0	0	0	0	0	0	0	0	0	8	5	0	1	0	3	2	1	9	3	0	1	0	2	5	0	0	1	0	1	1	1	1	0	0	0
JCM 9534	Catenuloplanes indicus	Bacteria; Bacillati; Actinomycetota; Actinomycetes; Micromonosporales; Micromonosporaceae	0	1	2	1	2	1	0	2	0	1	1	9	0	1	0	0	0	0	0	2	2	10	3	0	0	1	1	2	1	6	3	1	1	1	2	4	0	0	0	0	1	1	1	1	0	0	0
JCM 9533	Catenuloplanes niger	Bacteria; Bacillati; Actinomycetota; Actinomycetes; Micromonosporales; Micromonosporaceae	0	1	2	1	2	1	0	2	0	1	1	8	0	1	0	0	0	0	0	2	2	11	3	0	3	2	1	3	1	6	5	1	1	2	1	4	0	0	0	0	1	1	1	1	0	0	0
JCM 7447	Corynebacterium amycolatum	Bacteria; Bacillati; Actinomycetota; Actinomycetes; Mycobacteriales; Corynebacteriaceae	0	0	0	1	1	2	0	2	0	1	0	3	0	0	0	0	0	0	0	0	0	0	0	0	0	0	0	0	0	0	1	0	0	1	0	0	0	0	1	0	1	1	0	0	0	0	0
JCM 12107	Corynebacterium simulans	Bacteria; Bacillati; Actinomycetota; Actinomycetes; Mycobacteriales; Corynebacteriaceae	0	1	0	1	0	2	0	3	0	0	0	0	0	0	0	0	0	0	0	0	0	0	0	0	0	0	0	0	0	0	1	0	0	1	0	1	0	0	1	0	1	1	0	1	0	0	0
JCM 15430	Mycobacterium avium	Bacteria; Bacillati; Actinomycetota; Actinomycetes; Mycobacteriales; Mycobacteriaceae	0	2	0	1	2	2	0	3	0	1	0	15	0	0	0	0	0	0	0	0	0	1	0	0	0	0	0	0	0	0	1	0	0	2	0	1	0	0	0	0	1	1	1	0	0	0	0
JCM 16369	Mycolicibacterium crocinum	Bacteria; Bacillati; Actinomycetota; Actinomycetes; Mycobacteriales; Mycobacteriaceae	0	2	0	1	2	3	0	3	0	2	0	13	0	0	0	0	0	0	0	0	0	0	0	0	0	0	0	0	0	0	0	0	0	2	0	1	0	0	1	0	1	1	1	0	0	0	0
JCM 12141	Mycolicibacterium hodleri	Bacteria; Bacillati; Actinomycetota; Actinomycetes; Mycobacteriales; Mycobacteriaceae	0	2	0	1	2	2	0	2	0	1	0	7	0	0	0	0	0	0	0	0	0	1	0	0	0	0	0	0	0	0	1	0	0	2	0	1	0	0	0	0	1	1	1	0	0	0	0
JCM 16370	Mycolicibacterium pallens	Bacteria; Bacillati; Actinomycetota; Actinomycetes; Mycobacteriales; Mycobacteriaceae	0	2	0	1	2	2	0	3	0	2	0	12	0	0	0	0	0	0	0	0	0	0	0	0	0	0	0	0	0	0	0	0	0	2	0	1	1	0	1	0	1	1	1	0	0	0	0
JCM 15927	Mycolicibacterium pyrenivorans	Bacteria; Bacillati; Actinomycetota; Actinomycetes; Mycobacteriales; Mycobacteriaceae	0	2	0	1	2	3	0	3	0	1	1	13	0	0	0	0	0	0	0	0	0	0	0	0	0	1	1	0	0	0	2	0	0	3	0	1	0	0	1	0	1	1	1	0	0	0	0
JCM 9803	Rhodococcus erythropolis	Bacteria; Bacillati; Actinomycetota; Actinomycetes; Mycobacteriales; Nocardiaceae	0	3	1	1	1	2	0	3	0	1	0	19	1	0	0	0	0	0	0	0	0	2	0	0	0	1	0	0	1	0	0	0	0	2	0	1	0	0	1	0	1	1	2	0	0	1	1
JCM 9804	Rhodococcus erythropolis	Bacteria; Bacillati; Actinomycetota; Actinomycetes; Mycobacteriales; Nocardiaceae	0	3	1	1	1	2	0	3	0	1	0	18	1	0	0	0	0	0	0	0	0	2	0	0	0	1	0	0	1	0	0	0	0	2	0	1	0	0	1	0	1	1	2	0	0	1	1
JCM 9805	Rhodococcus erythropolis	Bacteria; Bacillati; Actinomycetota; Actinomycetes; Mycobacteriales; Nocardiaceae	0	3	1	1	1	2	1	3	0	1	0	18	1	0	0	0	0	0	0	0	0	2	0	0	0	1	0	0	1	0	0	0	0	2	0	1	0	0	1	0	1	1	2	0	0	1	1
JCM 9791	Rhodococcus sp.	Bacteria; Bacillati; Actinomycetota; Actinomycetes; Mycobacteriales; Nocardiaceae	0	1	1	1	1	2	0	2	0	1	0	26	1	0	0	0	0	0	0	0	0	1	0	0	0	1	0	0	0	0	0	0	0	2	0	1	0	0	0	0	1	1	3	0	0	1	1
JCM 9793	Rhodococcus sp.	Bacteria; Bacillati; Actinomycetota; Actinomycetes; Mycobacteriales; Nocardiaceae	0	1	1	1	1	2	0	2	0	1	0	26	1	0	0	0	0	0	0	0	0	1	0	0	0	1	0	0	0	0	0	0	0	2	0	1	0	0	0	0	1	1	3	0	0	1	1
JCM 10703	Nocardioides nitrophenolicus	Bacteria; Bacillati; Actinomycetota; Actinomycetes; Propionibacteriales; Nocardioidaceae	0	1	2	1	1	2	1	2	0	1	0	12	1	0	0	1	1	0	0	0	0	1	0	0	3	0	0	0	0	0	1	0	0	2	0	1	0	0	0	0	0	0	1	0	0	1	0
JCM 10369	Nocardioides pyridinolyticus	Bacteria; Bacillati; Actinomycetota; Actinomycetes; Propionibacteriales; Nocardioidaceae	0	2	0	1	1	1	1	2	0	0	0	11	0	0	0	0	0	0	0	0	1	1	0	0	0	1	0	0	0	0	2	1	0	2	0	2	1	0	0	0	0	0	1	0	0	0	0
JCM 16518	Nocardioides sp.	Bacteria; Bacillati; Actinomycetota; Actinomycetes; Propionibacteriales; Nocardioidaceae	0	1	1	1	2	1	1	2	0	0	1	9	0	0	0	0	0	0	0	0	0	2	0	0	0	1	0	0	0	1	1	0	0	2	0	1	1	0	0	0	1	0	1	0	0	0	0
JCM 18899	Nocardioides sp.	Bacteria; Bacillati; Actinomycetota; Actinomycetes; Propionibacteriales; Nocardioidaceae	0	3	1	1	1	1	2	2	1	1	0	15	0	0	0	0	0	0	0	0	0	3	0	0	0	0	0	0	0	0	2	0	0	2	0	1	0	0	0	0	1	0	2	0	0	0	0
JCM 18998	Nocardioides sp.	Bacteria; Bacillati; Actinomycetota; Actinomycetes; Propionibacteriales; Nocardioidaceae	0	1	1	1	1	1	0	1	1	0	0	9	0	0	0	0	0	0	0	0	0	6	0	0	1	0	1	0	0	0	2	1	0	2	0	2	0	0	0	0	1	0	1	0	0	0	0
JCM 18999	Nocardioides sp.	Bacteria; Bacillati; Actinomycetota; Actinomycetes; Propionibacteriales; Nocardioidaceae	0	2	1	1	1	1	0	1	0	1	0	8	0	0	0	0	0	0	0	0	0	3	0	0	0	0	0	1	0	0	0	0	0	1	0	1	0	0	0	0	1	0	1	0	0	0	0
JCM 18916	Cutibacterium acnes subsp. acnes	Bacteria; Bacillati; Actinomycetota; Actinomycetes; Propionibacteriales; Propionibacteriaceae	0	0	1	1	1	1	0	2	0	0	0	1	0	0	0	0	0	0	0	0	0	0	0	1	0	0	0	0	1	1	1	0	0	1	0	2	0	0	1	0	0	0	0	0	0	0	0
JCM 18909	Cutibacterium acnes subsp. elongatum	Bacteria; Bacillati; Actinomycetota; Actinomycetes; Propionibacteriales; Propionibacteriaceae	0	0	1	1	1	1	0	2	0	0	0	1	0	0	0	0	0	0	0	0	0	1	0	1	0	0	0	0	1	1	1	0	0	1	0	3	0	0	1	0	0	0	1	0	0	0	0
JCM 3263	Thermobifida fusca	Bacteria; Bacillati; Actinomycetota; Actinomycetes; Streptosporangiales; Nocardiopsidaceae	0	1	1	1	2	1	1	3	0	0	0	8	0	0	0	0	0	0	0	1	1	3	0	0	0	0	1	1	1	1	2	0	0	1	2	1	0	0	0	0	1	0	1	0	0	0	0
JCM 18997	Conexibacter sp.	Bacteria; Bacillati; Actinomycetota; Thermoleophilia; Solirubrobacterales; Conexibacteraceae	0	0	3	1	1	2	0	2	0	0	1	8	0	0	0	0	0	0	0	0	1	1	0	0	0	0	0	0	0	0	1	0	0	1	0	1	0	1	0	0	0	0	1	0	0	0	0
JCM 14450	Geobacillus stearothermophilus	Bacteria; Bacillati; Bacillota; Bacilli; Bacillales; Anoxybacillaceae	0	0	0	1	2	2	2	1	0	0	1	1	0	0	0	0	0	0	0	0	0	0	0	0	0	0	0	0	0	0	3	0	1	0	0	0	0	0	1	0	1	1	0	1	0	0	0
JCM 20266	Bacillus cereus	Bacteria; Bacillati; Bacillota; Bacilli; Bacillales; Bacillaceae	0	1	0	1	2	3	1	2	0	0	2	5	0	0	0	0	0	0	0	0	0	0	0	0	0	0	0	0	0	0	1	0	2	0	1	0	0	0	3	0	1	1	0	1	0	0	0
JCM 10596	Caldalkalibacillus mannanilyticus	Bacteria; Bacillati; Bacillota; Bacilli; Bacillales; Bacillaceae	0	0	1	1	3	1	2	1	0	1	1	4	0	1	0	0	0	0	0	0	0	1	0	0	0	1	0	0	1	0	3	0	2	0	1	2	0	0	0	0	1	0	0	1	0	0	0
JCM 21714	Gracilibacillus boraciitolerans	Bacteria; Bacillati; Bacillota; Bacilli; Bacillales; Bacillaceae	0	0	1	1	1	2	2	1	0	0	0	0	0	0	0	0	0	0	0	0	1	2	2	1	2	0	5	2	1	8	0	0	1	0	0	0	0	0	1	0	1	1	0	0	0	0	0
JCM 18860	Gracilibacillus pakistanensis	Bacteria; Bacillati; Bacillota; Bacilli; Bacillales; Bacillaceae	0	0	2	1	1	2	2	1	0	0	0	0	0	0	0	0	0	0	0	0	1	4	3	1	2	2	2	3	2	6	1	0	1	0	0	1	0	0	1	0	1	1	0	0	0	0	0
JCM 18966	Gracilibacillus sp.	Bacteria; Bacillati; Bacillota; Bacilli; Bacillales; Bacillaceae	0	0	2	1	1	2	2	1	0	0	0	0	0	0	0	0	0	0	0	0	1	3	3	1	0	2	2	3	1	7	1	0	1	0	0	1	0	0	1	0	1	1	0	0	0	0	0
JCM 9157	Halalkalibacter akibai	Bacteria; Bacillati; Bacillota; Bacilli; Bacillales; Bacillaceae	0	0	2	1	2	2	1	1	1	1	1	6	0	1	0	0	0	0	0	0	0	4	2	0	3	0	0	2	0	5	2	0	2	0	0	0	0	0	1	0	1	1	0	1	0	0	0
JCM 9140	Halalkalibacter wakoensis	Bacteria; Bacillati; Bacillota; Bacilli; Bacillales; Bacillaceae	0	0	1	1	1	3	1	1	1	1	0	11	0	1	0	0	0	0	0	0	0	1	1	0	0	0	0	3	0	0	0	0	1	0	0	0	0	0	2	0	1	1	0	1	0	0	0
JCM 12149	Lentibacillus halophilus	Bacteria; Bacillati; Bacillota; Bacilli; Bacillales; Bacillaceae	0	1	0	0	2	1	1	2	0	0	0	3	0	0	0	0	0	0	0	0	0	0	0	0	0	0	0	0	0	0	0	0	0	0	0	1	0	0	0	0	1	1	0	0	0	0	0
JCM 30234	Lentibacillus kimchii	Bacteria; Bacillati; Bacillota; Bacilli; Bacillales; Bacillaceae	0	1	0	0	1	1	1	2	0	1	0	9	0	0	0	0	0	0	0	0	0	0	0	0	0	0	0	0	0	0	0	0	0	0	0	1	0	0	0	0	1	1	1	0	0	0	0
JCM 18776	Lysinibacillus pakistanensis	Bacteria; Bacillati; Bacillota; Bacilli; Bacillales; Bacillaceae	0	0	1	1	2	0	1	1	0	1	1	8	0	0	0	0	0	0	0	0	0	0	0	0	0	0	0	0	0	0	0	0	0	0	0	0	0	0	0	0	0	0	0	0	0	0	0
JCM 12389	Salinibacillus aidingensis	Bacteria; Bacillati; Bacillota; Bacilli; Bacillales; Bacillaceae	0	0	0	0	1	1	1	2	0	1	0	15	0	0	0	0	0	0	0	0	0	0	0	0	0	0	0	1	0	0	0	0	0	0	0	1	0	0	0	0	1	1	0	0	0	0	0
JCM 30907	Virgibacillus ainsalahensis	Bacteria; Bacillati; Bacillota; Bacilli; Bacillales; Bacillaceae	0	1	0	1	1	1	0	1	0	1	1	15	0	0	0	0	0	0	0	0	0	1	1	0	0	0	0	1	0	2	0	0	1	0	0	0	0	1	0	0	1	1	0	0	0	0	0
JCM 32284	Virgibacillus kimchii	Bacteria; Bacillati; Bacillota; Bacilli; Bacillales; Bacillaceae	0	1	0	0	1	2	1	2	0	1	0	13	0	0	0	0	0	0	0	0	0	1	0	0	0	0	0	0	0	0	0	0	0	0	0	1	0	0	0	0	1	1	0	0	0	0	0
JCM 15395	Virgibacillus siamensis	Bacteria; Bacillati; Bacillota; Bacilli; Bacillales; Bacillaceae	0	1	1	0	2	1	1	2	0	1	0	8	0	0	0	0	0	0	0	0	0	0	0	0	0	0	0	0	0	1	0	0	0	0	0	2	0	0	0	0	1	1	0	0	0	0	0
JCM 7671	Listeria monocytogenes	Bacteria; Bacillati; Bacillota; Bacilli; Bacillales; Listeriaceae	0	0	0	1	1	2	1	1	0	0	1	0	0	0	0	0	0	0	0	0	0	2	0	0	0	0	0	0	0	0	1	0	0	0	1	0	0	0	2	0	2	1	0	2	0	0	0
JCM 16418	Paenibacillus pini	Bacteria; Bacillati; Bacillota; Bacilli; Bacillales; Paenibacillaceae	0	0	1	1	2	3	0	1	0	0	1	0	0	1	0	0	0	0	0	0	0	2	0	0	0	0	0	0	0	9	1	0	1	0	5	5	0	0	0	0	1	0	0	1	0	0	0
JCM 9795	Paenibacillus sp.	Bacteria; Bacillati; Bacillota; Bacilli; Bacillales; Paenibacillaceae	0	0	1	1	2	3	0	3	2	1	0	2	0	2	0	0	0	0	0	0	0	1	0	0	0	1	0	0	0	0	0	3	0	0	0	2	1	0	0	0	1	0	0	0	0	0	0
JCM 9796	Paenibacillus sp.	Bacteria; Bacillati; Bacillota; Bacilli; Bacillales; Paenibacillaceae	0	0	1	1	2	3	0	3	2	1	0	2	0	2	0	0	0	0	0	0	0	1	0	0	0	1	0	0	0	0	0	3	0	0	0	2	1	0	0	0	1	0	0	0	0	0	0
JCM 10914	Paenibacillus sp.	Bacteria; Bacillati; Bacillota; Bacilli; Bacillales; Paenibacillaceae	0	0	1	1	2	3	1	1	0	0	1	0	0	1	0	0	0	0	0	0	2	2	2	1	1	0	1	1	2	5	3	0	2	0	3	3	0	0	1	0	1	0	4	1	0	0	0
JCM 16163	Paenibacillus sp.	Bacteria; Bacillati; Bacillota; Bacilli; Bacillales; Paenibacillaceae	0	0	1	1	2	2	0	1	1	1	0	1	0	1	0	0	0	0	0	0	0	0	0	0	0	1	0	0	0	0	0	1	0	0	0	1	1	0	0	0	1	0	0	0	0	0	0
JCM 18996	Paenibacillus sp.	Bacteria; Bacillati; Bacillota; Bacilli; Bacillales; Paenibacillaceae	0	0	1	1	2	2	0	1	0	0	0	0	0	1	0	0	0	0	0	0	0	0	3	0	0	0	0	0	1	0	2	1	0	0	0	0	1	0	1	0	0	0	0	0	0	0	0
JCM 7540	Paenibacillus thiaminolyticus	Bacteria; Bacillati; Bacillota; Bacilli; Bacillales; Paenibacillaceae	0	0	1	1	2	1	0	3	0	0	1	3	0	1	0	0	0	0	0	0	0	4	0	0	0	0	0	0	2	5	2	1	0	0	4	4	1	0	1	0	1	0	1	1	0	0	0
JCM 2151	Staphylococcus aureus	Bacteria; Bacillati; Bacillota; Bacilli; Bacillales; Staphylococcaceae	0	0	0	0	3	1	0	1	0	0	1	0	0	0	0	0	0	0	0	0	0	0	0	0	0	0	0	0	0	0	0	0	0	0	0	0	0	0	2	0	1	1	0	1	0	0	0
JCM 2179	Staphylococcus aureus	Bacteria; Bacillati; Bacillota; Bacilli; Bacillales; Staphylococcaceae	0	0	0	0	3	1	0	1	0	0	1	0	0	0	0	0	0	0	0	0	0	0	0	0	0	0	0	0	0	0	0	0	0	0	0	0	0	0	2	0	1	1	0	1	0	0	0
JCM 8702	Staphylococcus aureus	Bacteria; Bacillati; Bacillota; Bacilli; Bacillales; Staphylococcaceae	0	0	0	0	3	1	0	1	0	0	1	0	0	0	0	0	0	0	0	0	0	0	0	0	0	0	0	0	0	0	0	0	0	0	0	0	0	0	2	0	1	1	0	1	0	0	0
JCM 14719	Calditerricola satsumensis	Bacteria; Bacillati; Bacillota; Bacilli; Calditerricolales; Calditerricolaceae	0	0	0	0	3	3	2	1	1	0	1	6	0	1	0	0	0	0	0	0	0	0	0	0	0	0	0	0	0	0	0	2	0	0	0	0	0	1	0	0	0	0	0	0	0	0	0
JCM 14720	Calditerricola yamamurae	Bacteria; Bacillati; Bacillota; Bacilli; Calditerricolales; Calditerricolaceae	0	0	0	0	3	2	1	2	1	0	1	6	0	1	0	0	0	0	0	0	0	0	0	0	0	0	0	0	0	0	0	2	0	0	0	0	0	1	0	0	0	0	0	0	0	0	0
JCM 20313	Enterococcus faecalis	Bacteria; Bacillati; Bacillota; Bacilli; Lactobacillales; Enterococcaceae	0	0	0	0	0	1	1	0	0	0	1	0	0	1	0	0	0	0	0	0	0	1	0	0	1	0	0	0	0	2	0	0	0	0	1	0	0	0	2	0	1	1	0	1	0	0	0
JCM 31185	Furfurilactobacillus curtus	Bacteria; Bacillati; Bacillota; Bacilli; Lactobacillales; Lactobacillaceae	0	0	1	0	0	0	0	0	0	0	1	0	0	0	0	0	0	0	0	0	0	0	0	0	0	0	0	1	0	1	0	0	0	0	0	1	0	0	2	0	1	1	0	0	0	0	0
JCM 17300	Ligilactobacillus faecis	Bacteria; Bacillati; Bacillota; Bacilli; Lactobacillales; Lactobacillaceae	0	0	0	1	0	1	1	0	0	0	1	0	0	0	0	0	0	0	0	0	0	0	0	0	0	0	0	0	0	1	0	0	0	0	0	0	0	0	1	0	3	1	0	1	0	0	0
JCM 18671	Secundilactobacillus oryzae	Bacteria; Bacillati; Bacillota; Bacilli; Lactobacillales; Lactobacillaceae	0	0	0	1	0	1	1	0	0	0	1	0	0	0	0	0	0	0	0	0	0	0	0	0	0	0	0	0	0	0	0	0	0	0	0	0	0	0	2	0	3	1	0	0	0	0	0
JCM 31116	Streptococcus alactolyticus	Bacteria; Bacillati; Bacillota; Bacilli; Lactobacillales; Streptococcaceae	0	0	0	1	1	1	1	1	0	0	1	0	0	0	0	0	0	0	0	0	0	0	0	0	0	0	0	0	0	0	0	0	1	0	0	0	0	0	1	0	1	1	0	1	0	0	0
JCM 5802	Streptococcus equinus	Bacteria; Bacillati; Bacillota; Bacilli; Lactobacillales; Streptococcaceae	0	0	0	1	1	2	1	2	0	0	1	0	0	0	0	0	0	0	0	0	0	0	2	0	0	1	0	0	0	0	2	0	1	0	0	0	0	0	1	0	1	1	0	1	0	0	0
JCM 12261	Streptococcus gallolyticus subsp. pasteurianus	Bacteria; Bacillati; Bacillota; Bacilli; Lactobacillales; Streptococcaceae	0	0	0	1	1	1	1	1	0	0	1	0	0	1	0	0	0	0	0	0	0	0	0	0	0	0	0	0	0	1	1	0	1	0	0	0	0	0	2	0	1	1	0	1	0	0	0
JCM 5176	Streptococcus sobrinus	Bacteria; Bacillati; Bacillota; Bacilli; Lactobacillales; Streptococcaceae	0	0	0	1	1	1	1	1	0	0	1	0	0	0	0	0	0	0	0	0	0	0	0	0	0	0	0	0	0	0	1	0	1	0	0	0	0	0	1	0	1	1	0	1	0	0	0
JCM 16981	Salinicoccus jeotgali	Bacteria; Bacillati; Bacillota; Bacilli; Staphylococcales; Salinicoccaceae	0	1	0	0	1	2	1	0	0	1	0	0	0	0	0	0	0	0	0	0	0	0	0	0	0	0	0	0	0	0	1	0	1	0	0	0	0	0	0	0	1	1	0	0	0	0	0
JCM 19029	Salinicoccus sesuvii	Bacteria; Bacillati; Bacillota; Bacilli; Staphylococcales; Salinicoccaceae	0	0	0	0	1	1	1	0	0	1	0	0	0	0	0	0	0	0	0	0	0	1	0	0	0	0	0	0	0	0	1	0	1	0	0	0	0	0	0	0	1	1	0	1	0	0	0
JCM 12822	Salinicoccus siamensis	Bacteria; Bacillati; Bacillota; Bacilli; Staphylococcales; Salinicoccaceae	0	0	0	0	1	2	1	0	0	1	2	0	0	0	0	0	0	0	0	0	0	0	0	0	0	0	0	0	0	0	1	0	1	0	0	0	0	1	0	0	1	1	0	0	0	0	0
JCM 19376	Fusibacter bizertensis	Bacteria; Bacillati; Bacillota; Clostridia; Eubacteriales	0	0	1	0	0	1	3	0	0	0	0	1	0	1	0	0	0	0	0	0	1	5	0	0	0	0	0	0	0	1	1	0	2	0	0	0	1	0	0	0	1	1	0	2	0	0	0
JCM 19912	Fusibacter fontis	Bacteria; Bacillati; Bacillota; Clostridia; Eubacteriales	0	0	1	0	0	1	2	0	0	0	1	1	0	0	0	0	0	0	0	0	0	4	0	0	0	0	0	0	0	0	1	0	2	0	0	0	1	0	0	0	1	1	0	1	0	0	0
JCM 13267	Howardella ureilytica	Bacteria; Bacillati; Bacillota; Clostridia; Eubacteriales	0	0	0	1	1	1	2	1	0	0	0	0	0	0	0	0	0	0	0	0	0	0	0	0	0	0	0	0	0	0	0	0	0	0	0	0	1	0	0	0	1	1	0	1	0	0	0
JCM 30795	Agathobaculum butyriciproducens	Bacteria; Bacillati; Bacillota; Clostridia; Eubacteriales; Butyricicoccaceae	0	0	1	1	1	1	2	2	0	0	0	2	0	0	0	0	0	0	0	0	0	0	0	0	0	0	0	0	0	0	0	0	0	0	0	1	0	0	1	0	1	1	0	1	0	0	0
JCM 1385	Clostridium baratii	Bacteria; Bacillati; Bacillota; Clostridia; Eubacteriales; Clostridiaceae	0	0	0	0	1	1	1	1	0	0	0	1	0	1	0	0	0	0	0	0	0	2	0	1	0	0	0	0	0	3	1	0	2	0	3	5	0	0	2	0	2	1	0	1	0	0	0
JCM 9989	Clostridium budayi	Bacteria; Bacillati; Bacillota; Clostridia; Eubacteriales; Clostridiaceae	0	0	0	0	1	1	1	1	0	0	0	1	0	0	0	0	0	0	0	0	0	2	0	1	0	0	0	0	0	3	1	0	2	0	3	2	0	0	1	0	2	1	0	1	0	0	0
JCM 1393	Clostridium carnis	Bacteria; Bacillati; Bacillota; Clostridia; Eubacteriales; Clostridiaceae	0	0	0	0	1	1	1	1	0	0	1	1	0	1	0	0	0	0	0	0	0	0	0	0	0	0	0	0	0	5	0	0	0	0	0	5	0	0	2	0	2	1	0	2	0	0	0
JCM 14030	Clostridium nitrophenolicum	Bacteria; Bacillati; Bacillota; Clostridia; Eubacteriales; Clostridiaceae	0	0	3	0	1	1	2	2	0	0	2	3	0	0	0	0	0	0	0	0	0	0	0	0	0	0	0	0	0	1	0	0	1	0	0	1	0	0	1	0	1	1	0	1	0	0	0
JCM 1406	Clostridium novyi	Bacteria; Bacillati; Bacillota; Clostridia; Eubacteriales; Clostridiaceae	0	0	0	0	1	2	3	1	0	0	0	2	0	0	0	0	0	0	0	0	0	0	0	0	0	0	0	0	0	0	0	0	1	0	0	0	1	0	1	0	1	1	0	1	0	0	0
JCM 10519	Clostridium sp.	Bacteria; Bacillati; Bacillota; Clostridia; Eubacteriales; Clostridiaceae	0	0	0	1	1	1	1	1	0	0	1	4	0	1	0	0	0	0	0	0	0	1	0	0	0	0	0	0	0	5	1	0	0	0	3	2	0	0	1	0	1	1	0	1	0	0	0
JCM 21531	Acetivibrio straminisolvens	Bacteria; Bacillati; Bacillota; Clostridia; Eubacteriales; Oscillospiraceae	0	0	1	1	1	1	2	2	0	0	1	0	0	0	0	0	0	0	0	0	16	4	3	0	0	4	0	1	0	1	0	1	0	0	1	1	2	0	2	0	1	1	0	1	0	0	0
JCM 17042	Ruminococcus champanellensis	Bacteria; Bacillati; Bacillota; Clostridia; Eubacteriales; Oscillospiraceae	0	0	1	1	1	1	0	1	0	0	1	0	0	0	0	0	0	0	0	0	9	1	2	0	0	3	1	1	0	1	0	0	0	1	0	0	0	0	2	0	1	0	0	1	0	0	0
JCM 17209	Desulfovectis peckii	Bacteria; Bacillati; Bacillota; Clostridia; Eubacteriales; Peptococcaceae	0	0	0	0	1	1	2	1	1	0	2	0	0	0	0	0	0	0	0	0	0	0	0	0	0	0	0	0	0	0	0	0	0	0	0	0	0	0	0	1	0	0	1	0	0	0	0
JCM 15048	Symbiobacterium ostreiconchae	Bacteria; Bacillati; Bacillota; Clostridia; Eubacteriales; Symbiobacteriaceae	0	0	1	0	1	1	1	2	2	0	0	5	0	1	1	0	0	0	0	0	0	0	0	0	0	0	0	0	0	0	0	0	0	0	0	2	3	0	0	0	1	0	1	2	0	0	0
JCM 15996	Symbiobacterium turbinis	Bacteria; Bacillati; Bacillota; Clostridia; Eubacteriales; Symbiobacteriaceae	0	0	1	0	1	1	1	2	2	0	1	5	0	1	1	0	0	0	0	0	0	1	0	0	0	0	0	0	0	0	1	0	0	0	0	3	2	0	0	0	1	0	2	2	0	0	0
JCM 18213	Halanaerobium sehlinense	Bacteria; Bacillati; Bacillota; Clostridia; Halanaerobiales; Halanaerobiaceae	0	0	0	0	1	2	1	2	0	0	0	0	0	0	0	0	0	0	0	0	0	0	0	1	0	0	0	0	0	0	1	0	1	0	0	2	2	0	1	0	3	2	0	1	0	0	0
JCM 15060	Halanaerobaculum tunisiense	Bacteria; Bacillati; Bacillota; Clostridia; Halanaerobiales; Halobacteroidaceae	0	2	1	0	1	1	1	2	1	0	1	1	0	0	0	0	0	0	0	0	0	0	0	0	0	0	0	0	0	0	0	0	1	0	0	0	1	0	1	0	1	1	0	1	0	0	0
JCM 16358	Halanaerocella petrolearia	Bacteria; Bacillati; Bacillota; Clostridia; Halanaerobiales; Halobacteroidaceae	0	0	1	0	1	1	1	2	0	0	3	0	0	0	0	0	0	0	0	0	0	2	1	0	0	0	0	0	1	0	0	0	1	0	0	0	1	0	2	0	1	1	0	1	0	0	0
JCM 16312	Defluviitalea saccharophila	Bacteria; Bacillati; Bacillota; Clostridia; Lachnospirales; Defluviitaleaceae	0	0	0	1	1	1	3	2	0	0	1	0	0	0	0	0	0	0	0	0	0	2	0	0	0	0	1	0	0	0	0	0	0	0	0	2	2	0	0	0	1	1	0	2	0	0	0
JCM 17205	Blautia faecis	Bacteria; Bacillati; Bacillota; Clostridia; Lachnospirales; Lachnospiraceae	0	0	0	1	1	1	1	2	0	0	0	0	0	0	0	0	0	0	0	0	1	12	2	0	5	0	3	2	1	7	0	0	0	0	0	2	0	0	2	0	1	1	0	1	0	0	0
JCM 17039	Blautia glucerasea	Bacteria; Bacillati; Bacillota; Clostridia; Lachnospirales; Lachnospiraceae	0	0	0	1	1	1	1	1	0	0	1	0	0	0	0	0	0	0	0	0	0	3	0	0	3	0	1	0	0	3	0	0	0	1	0	0	0	0	0	0	1	1	0	2	0	0	0
JCM 17204	Blautia stercoris	Bacteria; Bacillati; Bacillota; Clostridia; Lachnospirales; Lachnospiraceae	0	0	0	1	1	2	1	2	0	0	1	0	0	0	0	0	0	0	0	0	0	3	2	0	0	0	3	2	0	6	0	0	0	0	0	0	0	0	1	0	1	0	0	1	0	0	0
JCM 18507	Fusicatenibacter saccharivorans	Bacteria; Bacillati; Bacillota; Clostridia; Lachnospirales; Lachnospiraceae	0	0	0	1	2	1	1	3	0	0	0	0	0	0	0	0	0	0	0	0	0	12	4	1	2	0	4	1	1	7	0	0	1	0	1	2	0	0	1	0	1	1	0	1	0	0	0
JCM 15917	Mediterraneibacter faecis	Bacteria; Bacillati; Bacillota; Clostridia; Lachnospirales; Lachnospiraceae	0	0	0	1	1	1	1	1	0	0	1	0	0	0	0	0	0	0	0	0	0	6	0	0	2	0	0	0	0	4	0	0	0	1	0	0	0	0	3	0	1	1	0	1	0	0	0
JCM 13368	Mediterraneibacter glycyrrhizinilyticus	Bacteria; Bacillati; Bacillota; Clostridia; Lachnospirales; Lachnospiraceae	0	0	0	1	1	1	1	2	0	0	1	0	0	0	0	0	0	0	0	0	0	12	0	1	11	0	1	3	0	12	0	0	0	1	0	2	0	0	0	0	1	3	0	1	0	0	0
JCM 13369	Mediterraneibacter glycyrrhizinilyticus	Bacteria; Bacillati; Bacillota; Clostridia; Lachnospirales; Lachnospiraceae	0	0	0	1	1	1	1	2	0	0	1	0	0	0	0	0	0	0	0	0	0	12	0	1	11	0	1	3	0	12	0	0	0	1	0	2	0	0	0	0	1	3	0	1	0	0	0
JCM 17581	Roseburia faecis	Bacteria; Bacillati; Bacillota; Clostridia; Lachnospirales; Lachnospiraceae	0	0	0	1	1	1	1	1	0	0	0	1	0	0	0	0	0	0	0	0	0	4	3	0	0	1	0	2	1	5	2	0	1	1	0	0	0	0	1	0	1	1	0	1	0	0	0
JCM 11672	Alkaliphilus crotonatoxidans	Bacteria; Bacillati; Bacillota; Clostridia; Peptostreptococcales; Natronincolaceae	0	0	3	0	1	1	1	2	0	0	2	1	0	0	0	0	0	0	0	0	0	0	0	0	1	0	0	1	0	0	0	0	0	0	0	1	1	0	0	0	1	0	0	1	0	0	0
JCM 13990	Tindallia texcoconensis	Bacteria; Bacillati; Bacillota; Clostridia; Peptostreptococcales; Tindalliaceae	0	0	1	0	1	1	0	1	0	0	0	0	0	1	0	0	0	0	0	0	0	0	0	0	0	1	0	0	0	0	0	0	0	1	0	1	0	0	0	0	1	0	0	1	0	0	0
JCM 16816	Thermoanaerobacter brockii subsp. lactiethylicus	Bacteria; Bacillati; Bacillota; Clostridia; Thermoanaerobacterales; Thermoanaerobacteraceae	0	0	1	0	1	1	1	1	0	0	1	0	0	0	0	0	0	0	0	0	0	1	0	0	0	0	0	0	1	1	1	0	0	0	0	1	0	0	1	0	1	1	0	0	0	0	0
JCM 18270	Thermoanaerobacterium calidifontis	Bacteria; Bacillati; Bacillota; Clostridia; Thermoanaerobacterales; Thermoanaerobacteraceae	0	0	0	0	1	1	3	1	0	0	1	0	0	0	0	0	0	0	0	0	0	1	1	0	0	0	1	0	0	1	0	1	0	0	0	0	0	0	1	0	1	1	0	1	0	0	0
JCM 15765	Desulfitobacterium aromaticivorans	Bacteria; Bacillati; Bacillota; Desulfitobacteriia; Desulfitobacteriales; Desulfitobacteriaceae	0	2	0	0	1	2	1	3	1	0	1	9	0	3	1	0	1	0	0	0	0	0	0	0	0	0	0	0	0	0	0	0	0	0	0	0	3	0	1	0	2	0	2	0	0	0	0
JCM 17380	Desulfosporosinus burensis	Bacteria; Bacillati; Bacillota; Desulfitobacteriia; Desulfitobacteriales; Desulfitobacteriaceae	0	1	3	1	2	2	2	1	0	0	1	7	0	3	0	0	0	0	0	0	0	0	0	0	0	0	0	0	0	0	0	0	0	0	0	0	2	0	0	0	1	0	2	0	0	0	0
JCM 31105	Desulfosporosinus nitroreducens	Bacteria; Bacillati; Bacillota; Desulfitobacteriia; Desulfitobacteriales; Desulfitobacteriaceae	0	0	5	1	1	3	2	1	0	0	2	5	0	1	0	0	1	0	0	0	0	0	0	0	0	0	0	0	0	0	0	0	0	0	0	0	0	0	1	0	1	0	2	0	0	0	0
JCM 14036	Desulfotomaculum defluvii	Bacteria; Bacillati; Bacillota; Desulfotomaculia; Desulfotomaculales; Desulfotomaculaceae	0	0	0	1	1	1	2	1	0	0	1	4	0	1	0	0	0	0	0	0	0	0	0	0	0	0	0	0	0	0	0	0	0	0	0	0	0	0	1	1	1	0	0	0	0	0	0
JCM 39194	Desulfotomaculum varum	Bacteria; Bacillati; Bacillota; Desulfotomaculia; Desulfotomaculales; Desulfotomaculaceae	0	2	1	0	1	1	2	2	0	0	1	0	0	1	0	0	0	0	0	0	0	0	0	0	0	0	0	0	0	0	0	0	0	0	0	0	0	0	1	1	1	0	1	1	0	0	0
JCM 10604	Coprobacillus cateniformis	Bacteria; Bacillati; Bacillota; Erysipelotrichia; Erysipelotrichales; Coprobacillaceae	0	0	1	1	1	1	0	1	0	0	1	0	0	1	0	0	0	0	0	0	0	3	0	0	1	0	0	0	0	2	1	0	1	0	0	1	0	0	3	0	2	0	0	1	0	0	0
JCM 30191	Breznakia pachnodae	Bacteria; Bacillati; Bacillota; Erysipelotrichia; Erysipelotrichales; Erysipelotrichaceae	0	0	1	1	1	1	0	1	0	0	1	0	0	1	0	0	0	0	0	0	0	1	0	0	0	0	0	0	0	1	1	0	1	0	0	1	0	0	1	0	1	1	0	1	0	0	0
JCM 32836	Desulfosporomusa polytropa	Bacteria; Bacillati; Bacillota; Negativicutes; Selenomonadales; Sporomusaceae	0	0	3	1	3	4	2	3	0	0	3	4	0	2	0	0	0	0	0	0	0	0	0	0	0	1	0	0	0	0	0	0	0	0	0	0	1	0	1	0	1	1	0	0	0	0	0
JCM 13218	Sporomusa intestinalis	Bacteria; Bacillati; Bacillota; Negativicutes; Selenomonadales; Sporomusaceae	0	1	3	1	2	4	0	2	1	0	2	10	0	3	0	0	0	1	1	0	0	0	0	0	0	0	0	0	0	0	1	0	0	0	1	0	1	0	1	0	1	0	1	1	0	0	0
JCM 31403	Megasphaera hexanoica	Bacteria; Bacillati; Bacillota; Negativicutes; Veillonellales; Veillonellaceae	0	0	3	1	0	0	4	1	0	0	0	4	0	0	0	0	0	0	0	0	0	0	0	0	0	0	0	0	0	0	0	0	0	0	0	1	1	0	0	0	1	1	0	0	0	0	0
JCM 13344	Syntrophomonas erecta subsp. sporosyntropha	Bacteria; Bacillati; Bacillota; Syntrophomonadia; Syntrophomonadales; Syntrophomonadaceae	0	0	0	0	1	2	0	1	0	0	0	5	0	1	0	0	0	0	0	0	0	0	0	0	0	0	0	0	0	0	0	0	0	0	0	0	0	0	0	0	1	1	0	1	0	0	0
JCM 17260	Thermosyntropha tengcongensis	Bacteria; Bacillati; Bacillota; Syntrophomonadia; Syntrophomonadales; Syntrophomonadaceae	0	0	0	0	1	1	0	1	0	0	0	3	0	1	0	0	0	0	0	0	0	0	0	0	0	0	0	0	0	0	0	0	0	0	0	0	0	0	0	0	1	1	0	1	0	0	0
JCM 13210	Thermaerobacter litoralis	Bacteria; Bacillati; Bacillota; Thermaerobacteria; Thermaerobacterales; Thermaerobacteraceae	0	1	0	0	1	1	1	1	0	0	0	5	0	0	0	0	0	0	0	0	0	0	0	0	0	0	0	0	0	0	1	0	0	0	0	0	0	0	0	1	0	0	2	0	0	0	0
JCM 11223	Thermaerobacter nagasakiensis	Bacteria; Bacillati; Bacillota; Thermaerobacteria; Thermaerobacterales; Thermaerobacteraceae	0	1	0	0	1	1	1	1	0	0	1	5	0	0	0	0	0	0	0	0	0	1	0	0	0	0	0	0	0	0	1	0	0	0	0	1	0	1	0	1	0	0	2	0	0	0	0
JCM 17239	Anaerosalibacter bizertensis	Bacteria; Bacillati; Bacillota; Tissierellia; Tissierellales; Sporanaerobacteraceae	0	0	1	0	0	0	1	2	0	0	0	2	0	0	0	0	0	0	0	0	0	0	0	0	0	0	0	0	0	0	0	0	0	0	0	1	0	0	1	0	1	0	0	0	0	0	0
JCM 30480	Brassicibacter thermophilus	Bacteria; Bacillati; Bacillota; Tissierellia; Tissierellales; Thermohalobacteraceae	0	0	1	0	0	0	1	1	0	0	0	1	0	0	0	0	0	0	0	0	0	0	0	0	0	0	0	0	0	0	0	0	0	0	0	0	0	0	0	0	1	0	0	0	0	0	0
JCM 16120	Caldilinea tarbellica	Bacteria; Bacillati; Chloroflexota; Caldilineae; Caldilineales; Caldilineaceae	0	2	1	0	3	1	3	3	0	0	0	6	0	0	0	0	0	0	0	0	0	5	5	0	3	0	0	0	1	4	0	1	1	1	0	4	0	0	1	1	0	0	2	0	0	0	0
JCM 9492	Aquifex pyrophilus	Bacteria; Pseudomonadati; Aquificota; Aquificia; Aquificales; Aquificaceae	2	0	0	0	1	1	1	1	0	0	0	0	0	1	0	0	0	0	0	0	1	0	0	0	0	0	0	0	0	0	0	0	0	0	0	0	2	0	0	0	0	0	1	0	0	0	0
JCM 13302	Hydrogenivirga okinawensis	Bacteria; Pseudomonadati; Aquificota; Aquificia; Aquificales; Aquificaceae	2	0	0	0	1	1	1	1	0	0	0	0	0	1	0	0	0	0	0	0	0	0	0	0	0	0	0	0	0	0	0	0	0	0	0	0	0	0	0	0	0	0	1	0	0	0	0
JCM 10560	Hydrogenobacter subterraneus	Bacteria; Pseudomonadati; Aquificota; Aquificia; Aquificales; Aquificaceae	1	0	0	0	1	1	1	1	0	0	0	0	0	1	0	0	0	0	0	0	0	0	0	0	0	0	0	0	0	0	0	0	0	0	0	0	2	0	0	0	0	0	1	0	0	0	0
JCM 8795	Hydrogenobaculum acidophilum	Bacteria; Pseudomonadati; Aquificota; Aquificia; Aquificales; Aquificaceae	1	0	0	0	1	1	1	1	0	0	0	0	0	1	0	0	0	0	0	0	0	0	0	0	0	0	0	0	0	0	0	0	0	0	0	0	2	0	0	0	0	0	1	0	0	0	0
JCM 12825	Desulfurobacterium crinifex	Bacteria; Pseudomonadati; Aquificota; Aquificia; Desulfurobacteriales; Desulfurobacteriaceae	1	0	0	0	1	1	1	1	0	0	0	0	0	1	0	0	0	0	0	0	0	0	0	0	0	0	0	0	0	0	0	0	0	0	0	0	1	0	0	1	0	0	1	0	0	0	0
JCM 12127	Desulfurobacterium pacificum	Bacteria; Pseudomonadati; Aquificota; Aquificia; Desulfurobacteriales; Desulfurobacteriaceae	1	0	0	0	1	1	1	1	0	0	0	0	0	1	0	0	0	0	0	0	0	0	0	0	0	0	0	0	0	0	0	0	0	0	0	0	1	0	0	0	0	0	1	0	0	0	0
JCM 11468	Thermovibrio ruber	Bacteria; Pseudomonadati; Aquificota; Aquificia; Desulfurobacteriales; Desulfurobacteriaceae	1	0	0	0	1	1	1	1	0	0	0	0	0	1	0	0	0	0	0	0	0	0	0	0	0	0	0	0	0	0	0	0	0	0	0	0	1	0	0	1	0	0	1	0	0	0	0
JCM 14244	Venenivibrio stagnispumantis	Bacteria; Pseudomonadati; Aquificota; Aquificia; Hydrogenothermales; Hydrogenothermaceae	1	0	0	0	1	1	1	1	0	0	0	0	0	1	0	0	0	0	0	0	1	0	0	0	0	0	0	0	0	0	0	1	0	0	0	0	1	0	0	0	0	0	2	0	0	0	0
JCM 10556	Bacteroides acidifaciens	Bacteria; Pseudomonadati; Bacteroidota; Bacteroidia; Bacteroidales; Bacteroidaceae	0	0	0	1	0	1	1	1	0	0	0	0	0	0	0	0	0	0	0	0	0	10	6	1	2	1	1	5	2	10	3	0	2	0	0	10	0	0	0	0	1	1	0	1	0	0	0
JCM 11017	Bacteroides fragilis	Bacteria; Pseudomonadati; Bacteroidota; Bacteroidia; Bacteroidales; Bacteroidaceae	0	0	0	1	0	1	1	1	0	0	0	0	0	0	0	0	0	0	0	0	0	8	2	0	2	3	0	1	1	16	2	0	1	0	0	14	0	0	0	0	1	1	0	1	0	0	0
JCM 12987	Bacteroides nordii	Bacteria; Pseudomonadati; Bacteroidota; Bacteroidia; Bacteroidales; Bacteroidaceae	0	0	0	1	0	1	1	1	0	0	0	0	0	0	0	0	0	0	0	0	2	16	0	0	1	0	0	2	1	12	1	0	1	0	0	14	0	0	0	0	1	1	0	1	0	0	0
JCM 6292	Bacteroides pyogenes	Bacteria; Pseudomonadati; Bacteroidota; Bacteroidia; Bacteroidales; Bacteroidaceae	0	0	0	1	0	1	1	1	0	0	0	0	0	0	0	0	0	0	0	0	0	2	0	0	0	0	0	0	1	4	2	0	1	0	0	6	0	0	0	0	1	1	0	1	0	0	0
JCM 6294	Bacteroides pyogenes	Bacteria; Pseudomonadati; Bacteroidota; Bacteroidia; Bacteroidales; Bacteroidaceae	0	0	0	1	0	1	1	1	0	0	0	0	0	0	0	0	0	0	0	0	0	2	0	0	0	0	0	0	1	4	2	0	1	0	0	6	0	0	0	0	1	1	0	1	0	0	0
JCM 10003	Bacteroides pyogenes	Bacteria; Pseudomonadati; Bacteroidota; Bacteroidia; Bacteroidales; Bacteroidaceae	0	0	0	1	0	1	1	1	0	0	0	0	0	0	0	0	0	0	0	0	0	3	0	0	0	0	0	0	1	4	2	0	1	0	0	6	0	0	0	0	1	1	0	1	0	0	0
JCM 10512	Bacteroides reticulotermitis	Bacteria; Pseudomonadati; Bacteroidota; Bacteroidia; Bacteroidales; Bacteroidaceae	0	0	0	1	0	1	1	1	0	0	0	0	0	0	0	0	0	0	0	0	1	12	7	1	7	3	4	10	0	16	2	0	0	0	0	3	0	0	0	0	1	1	0	1	0	0	0
JCM 16496	Bacteroides rodentium	Bacteria; Pseudomonadati; Bacteroidota; Bacteroidia; Bacteroidales; Bacteroidaceae	0	0	0	1	0	1	1	1	0	0	0	0	0	0	0	0	0	0	0	0	5	17	6	1	1	5	3	4	2	16	1	0	1	0	1	5	0	0	0	0	1	1	0	1	0	0	0
JCM 15092	Phocaeicola paurosaccharolyticus	Bacteria; Pseudomonadati; Bacteroidota; Bacteroidia; Bacteroidales; Bacteroidaceae	0	0	0	1	0	1	1	1	0	0	0	0	0	0	0	0	0	0	0	0	3	8	11	0	2	3	6	8	1	14	1	0	0	0	0	4	0	0	0	0	1	1	0	1	0	0	0
JCM 17136	Phocaeicola sartorii	Bacteria; Pseudomonadati; Bacteroidota; Bacteroidia; Bacteroidales; Bacteroidaceae	0	0	0	1	0	1	1	1	0	0	0	0	0	0	0	0	0	0	0	0	0	7	5	1	5	0	3	6	1	21	3	0	1	0	1	9	0	0	0	0	1	1	0	1	0	0	0
JCM 30204	Dysgonomonas termitidis	Bacteria; Pseudomonadati; Bacteroidota; Bacteroidia; Bacteroidales; Dysgonomonadaceae	0	0	1	1	0	1	1	1	0	0	0	0	0	0	0	0	0	0	0	0	2	12	9	0	16	0	3	8	3	13	4	0	0	0	2	7	0	0	0	0	1	1	0	1	0	0	0
JCM 12565	Petrimonas sulfuriphila	Bacteria; Pseudomonadati; Bacteroidota; Bacteroidia; Bacteroidales; Dysgonomonadaceae	0	0	1	1	1	1	1	1	0	0	0	0	0	0	0	0	0	0	0	0	0	3	0	0	12	0	0	0	3	6	2	0	0	0	0	5	0	0	0	0	1	1	1	0	0	0	0
JCM 15907	Porphyromonas gingivicanis	Bacteria; Pseudomonadati; Bacteroidota; Bacteroidia; Bacteroidales; Porphyromonadaceae	0	0	0	1	1	1	0	0	0	0	0	1	0	0	0	0	0	0	0	0	0	0	0	0	0	0	0	0	0	0	0	0	0	0	0	1	0	0	0	0	1	1	0	1	0	0	0
JCM 17484	Hoylesella saccharolytica	Bacteria; Pseudomonadati; Bacteroidota; Bacteroidia; Bacteroidales; Prevotellaceae	0	0	0	1	0	1	1	1	0	0	0	0	0	0	0	0	0	0	0	0	0	3	4	0	2	1	0	0	0	2	2	0	1	0	0	2	0	0	0	0	1	1	0	1	0	0	0
JCM 15640	Hoylesella timonensis	Bacteria; Pseudomonadati; Bacteroidota; Bacteroidia; Bacteroidales; Prevotellaceae	0	0	0	1	0	0	1	1	0	0	0	0	0	0	0	0	0	0	0	0	0	1	0	0	0	0	0	0	0	3	3	0	1	0	0	5	0	0	0	0	1	1	0	0	0	0	0
JCM 15754	Prevotella aurantiaca	Bacteria; Pseudomonadati; Bacteroidota; Bacteroidia; Bacteroidales; Prevotellaceae	0	0	0	1	0	1	0	0	0	0	0	0	0	0	0	0	0	0	0	0	0	0	0	0	0	0	0	0	0	0	2	0	1	0	0	0	0	0	0	0	1	1	0	1	0	0	0
JCM 15908	Prevotella dentasini	Bacteria; Pseudomonadati; Bacteroidota; Bacteroidia; Bacteroidales; Prevotellaceae	0	0	0	1	0	1	0	1	0	0	0	0	0	0	0	0	0	0	0	0	0	0	0	0	0	0	0	0	0	0	2	0	1	0	0	0	0	0	0	0	0	0	0	1	0	0	0
JCM 13449	Prevotella denticola	Bacteria; Pseudomonadati; Bacteroidota; Bacteroidia; Bacteroidales; Prevotellaceae	0	0	0	1	0	1	1	1	0	0	0	0	0	0	0	0	0	0	0	0	0	1	0	0	0	2	0	0	0	3	3	0	1	0	0	2	0	0	0	0	1	1	0	1	0	0	0
JCM 15124	Prevotella falsenii	Bacteria; Pseudomonadati; Bacteroidota; Bacteroidia; Bacteroidales; Prevotellaceae	0	0	0	1	0	1	0	0	0	0	0	0	0	0	0	0	0	0	0	0	0	0	0	0	0	0	0	0	0	0	2	0	1	0	0	0	0	0	0	0	1	1	0	1	0	0	0
JCM 17724	Prevotella fusca	Bacteria; Pseudomonadati; Bacteroidota; Bacteroidia; Bacteroidales; Prevotellaceae	0	0	0	1	0	1	1	1	0	0	0	0	0	0	0	0	0	0	0	0	0	1	0	0	0	1	0	0	0	5	3	0	1	0	0	3	0	0	0	0	1	1	0	1	0	0	0
JCM 15637	Prevotella histicola	Bacteria; Pseudomonadati; Bacteroidota; Bacteroidia; Bacteroidales; Prevotellaceae	0	0	0	1	0	1	1	1	0	0	0	0	0	0	0	0	0	0	0	0	0	1	0	0	0	0	0	0	0	2	1	0	1	0	0	2	0	0	0	0	1	2	0	1	0	0	0
JCM 17725	Prevotella scopos	Bacteria; Pseudomonadati; Bacteroidota; Bacteroidia; Bacteroidales; Prevotellaceae	0	0	0	1	0	1	1	1	0	0	0	0	0	0	0	0	0	0	0	0	0	1	0	0	0	1	0	0	0	4	2	0	1	0	0	3	0	0	0	0	1	1	0	1	0	0	0
JCM 15579	Marinifilum fragile	Bacteria; Pseudomonadati; Bacteroidota; Bacteroidia; Marinilabiliales; Marinifilaceae	0	0	2	1	1	1	1	1	0	0	0	4	0	0	0	0	0	0	0	0	0	1	0	0	0	0	0	0	1	2	1	0	0	0	0	3	1	0	0	0	1	3	1	1	0	0	0
JCM 15548	Geofilum rubicundum	Bacteria; Pseudomonadati; Bacteroidota; Bacteroidia; Marinilabiliales; Marinilabiliaceae	0	0	0	1	1	1	0	1	0	0	0	1	0	0	0	0	0	0	0	0	2	7	3	0	0	4	2	4	2	12	1	0	0	1	0	4	0	0	0	0	1	1	0	1	0	0	0
JCM 15069	Lutaonella thermophila	Bacteria; Pseudomonadati; Bacteroidota; Flavobacteriia; Flavobacteriales; Flavobacteriaceae	0	0	0	1	1	2	1	1	0	0	0	2	0	0	0	0	0	0	0	0	0	0	0	0	0	0	0	0	1	0	0	0	0	0	0	3	0	0	0	0	0	1	1	0	0	0	0
JCM 15747	Thiofractor thiocamini	Bacteria; Pseudomonadati; Campylobacterota; Epsilonproteobacteria; Campylobacterales	0	0	0	0	1	1	1	1	0	0	0	0	0	1	0	0	0	0	0	0	0	0	0	0	0	0	0	0	0	0	0	0	0	0	0	0	1	0	0	0	1	1	1	0	0	0	0
JCM 2013	Campylobacter jejuni subsp. jejuni	Bacteria; Pseudomonadati; Campylobacterota; Epsilonproteobacteria; Campylobacterales; Campylobacteraceae	0	0	0	1	1	2	1	1	0	0	0	0	0	1	0	0	0	0	0	0	0	0	0	0	0	0	0	0	0	0	0	0	0	0	0	0	0	0	0	0	1	1	1	0	0	0	0
JCM 12095	Helicobacter pylori	Bacteria; Pseudomonadati; Campylobacterota; Epsilonproteobacteria; Campylobacterales; Helicobacteraceae	0	0	0	0	0	2	1	0	0	0	0	0	0	1	0	0	0	0	0	0	0	0	0	0	0	0	0	0	0	0	0	0	0	0	0	0	1	0	0	0	1	0	1	0	0	0	0
JCM 19824	Sulfurovum aggregans	Bacteria; Pseudomonadati; Campylobacterota; Epsilonproteobacteria; Campylobacterales; Sulfurovaceae	0	0	0	0	1	1	1	1	0	0	0	0	0	1	0	0	0	0	0	0	0	0	0	0	0	0	0	0	0	0	0	0	0	0	0	1	1	0	0	0	0	0	1	0	0	0	0
JCM 11957	Caminibacter profundus	Bacteria; Pseudomonadati; Campylobacterota; Epsilonproteobacteria; Nautiliales; Nautiliaceae	0	0	0	0	1	1	1	1	0	0	0	0	0	1	0	0	0	0	0	0	0	0	0	0	0	0	0	0	0	0	0	0	0	0	0	0	1	0	0	0	0	0	1	0	0	0	0
JCM 15390	Nautilia abyssi	Bacteria; Pseudomonadati; Campylobacterota; Epsilonproteobacteria; Nautiliales; Nautiliaceae	1	0	0	0	1	1	1	1	0	0	0	0	0	1	0	0	0	0	0	0	0	0	0	0	0	0	0	0	0	0	0	0	0	0	0	0	1	0	0	0	0	0	1	0	0	0	0
JCM 15786	Nautilia lithotrophica	Bacteria; Pseudomonadati; Campylobacterota; Epsilonproteobacteria; Nautiliales; Nautiliaceae	1	0	0	0	1	1	1	1	0	0	0	0	0	1	0	0	0	0	0	0	0	0	0	0	0	0	0	0	0	0	0	0	0	0	0	0	1	0	0	0	0	0	1	0	0	0	0
JCM 12457	Thioreductor micantisoli	Bacteria; Pseudomonadati; Campylobacterota; Epsilonproteobacteria; Nautiliales; Thioreductoraceae	0	0	0	0	0	1	1	1	0	0	0	0	0	1	0	0	0	0	0	0	0	0	0	0	0	0	0	0	0	0	0	0	0	0	0	0	1	0	0	0	1	1	1	0	0	0	0
JCM 15827	Desulfurispirillum alkaliphilum	Bacteria; Pseudomonadati; Chrysiogenota; Chrysiogenia; Chrysiogenales; Chrysiogenaceae	0	0	0	0	1	1	1	2	0	0	0	1	0	1	0	0	0	0	0	0	0	0	0	0	0	0	0	0	0	0	0	0	0	0	0	1	1	0	0	0	1	2	0	0	0	0	0
JCM 17152	Oligosphaera ethanolica	Bacteria; Pseudomonadati; Lentisphaerota; Oligosphaeria; Oligosphaerales; Oligosphaeraceae	0	0	0	1	1	1	1	1	0	0	1	0	0	0	0	0	0	0	0	0	1	0	1	0	5	0	0	0	2	4	0	0	0	0	0	2	0	0	1	0	2	1	0	1	0	0	0
JCM 13213	Thermodesulfovibrio aggregans	Bacteria; Pseudomonadati; Nitrospirota; Thermodesulfovibrionia; Thermodesulfovibrionales; Thermodesulfovibrionaceae	1	0	0	0	1	1	1	2	0	0	0	1	0	1	0	0	0	0	0	0	1	0	0	0	0	0	0	0	0	0	0	0	0	0	0	1	1	0	0	1	0	0	2	0	0	0	0
JCM 13991	Thermodesulfovibrio hydrogeniphilus	Bacteria; Pseudomonadati; Nitrospirota; Thermodesulfovibrionia; Thermodesulfovibrionales; Thermodesulfovibrionaceae	0	0	0	0	1	1	1	2	0	0	0	1	0	1	0	0	0	0	0	0	1	0	0	0	0	0	0	0	0	0	0	0	0	0	0	1	2	0	0	2	0	0	1	0	0	0	0
JCM 17478	Thermopirellula anaerolimosa	Bacteria; Pseudomonadati; Planctomycetota; Planctomycetia	0	0	1	1	1	1	1	1	0	0	0	0	0	1	0	0	0	0	0	0	0	0	2	0	2	1	0	0	0	0	0	0	0	1	0	0	0	0	0	1	2	0	1	0	0	0	0
JCM 19991	Thermogutta hypogea	Bacteria; Pseudomonadati; Planctomycetota; Planctomycetia; Pirellulales; Thermoguttaceae	0	0	1	1	1	1	1	1	0	0	0	0	0	1	0	0	0	0	0	0	0	0	2	0	2	1	0	0	0	0	0	0	0	1	0	0	0	0	0	1	2	0	1	0	0	0	0
JCM 19992	Thermostilla marina	Bacteria; Pseudomonadati; Planctomycetota; Planctomycetia; Pirellulales; Thermoguttaceae	0	0	1	1	1	1	1	2	0	0	0	0	0	1	0	0	0	0	0	0	1	0	3	0	1	2	0	0	1	1	0	0	0	1	0	0	0	0	0	1	2	0	1	0	0	0	0
JCM 25146	Acetobacter okinawensis	Bacteria; Pseudomonadati; Pseudomonadota; Alphaproteobacteria; Acetobacterales; Acetobacteraceae	0	0	0	1	1	2	4	1	1	0	1	0	0	0	0	0	0	0	0	0	1	0	0	0	0	0	0	0	0	0	0	0	0	0	0	1	0	0	0	0	1	0	2	0	1	0	3
JCM 25330	Acetobacter persici	Bacteria; Pseudomonadati; Pseudomonadota; Alphaproteobacteria; Acetobacterales; Acetobacteraceae	0	0	0	1	1	1	3	2	1	0	1	0	0	0	0	0	0	0	0	0	0	0	0	0	0	0	0	0	0	1	0	0	0	0	0	1	0	0	0	0	1	0	2	0	1	0	1
JCM 15831	Asaia astilbis	Bacteria; Pseudomonadati; Pseudomonadota; Alphaproteobacteria; Acetobacterales; Acetobacteraceae	0	0	0	1	1	2	2	1	1	0	0	0	0	0	0	0	0	0	0	0	1	2	0	0	0	0	0	0	0	0	0	0	0	0	0	1	0	0	0	0	1	0	0	0	0	0	1
JCM 25414	Asaia platycodi	Bacteria; Pseudomonadati; Pseudomonadota; Alphaproteobacteria; Acetobacterales; Acetobacteraceae	0	0	0	1	1	1	2	1	1	1	1	0	0	0	0	0	0	0	0	0	1	1	0	0	0	0	0	0	0	0	0	0	0	1	0	1	0	0	0	0	1	0	0	0	0	0	1
JCM 25354	Asaia prunellae	Bacteria; Pseudomonadati; Pseudomonadota; Alphaproteobacteria; Acetobacterales; Acetobacteraceae	0	0	0	1	1	2	2	1	1	1	1	0	0	0	0	0	0	0	0	0	0	3	0	0	0	0	0	0	0	0	0	0	0	1	0	1	0	0	0	0	1	0	0	0	0	0	0
JCM 21176	Gluconobacter cerinus	Bacteria; Pseudomonadati; Pseudomonadota; Alphaproteobacteria; Acetobacterales; Acetobacteraceae	0	0	0	1	1	1	2	1	1	0	1	1	0	0	0	0	0	0	0	0	0	0	0	0	0	0	0	0	0	0	0	0	0	1	0	1	0	0	0	0	0	0	1	0	1	0	0
JCM 25156	Komagataeibacter kakiaceti	Bacteria; Pseudomonadati; Pseudomonadota; Alphaproteobacteria; Acetobacterales; Acetobacteraceae	0	0	0	1	1	1	3	2	1	1	1	0	0	0	0	0	0	0	0	0	1	0	0	0	0	0	0	0	0	0	0	0	0	1	0	1	0	0	0	0	1	0	0	0	1	0	0
JCM 16408	Methylobacterium phyllosphaerae	Bacteria; Pseudomonadati; Pseudomonadota; Alphaproteobacteria; Hyphomicrobiales; Methylobacteriaceae	0	0	0	1	1	1	1	1	0	1	1	3	0	1	0	0	0	0	0	0	0	0	0	0	0	0	0	0	1	0	2	0	0	2	0	1	0	0	0	0	1	0	1	0	4	0	0
JCM 2811	Methylorubrum rhodinum	Bacteria; Pseudomonadati; Pseudomonadota; Alphaproteobacteria; Hyphomicrobiales; Methylobacteriaceae	0	0	0	1	1	1	1	1	0	1	2	0	0	0	0	0	0	0	0	0	0	1	0	0	0	0	0	0	0	0	1	0	0	3	0	1	0	0	0	0	0	0	1	0	6	0	0
JCM 10893	Methylorubrum thiocyanatum	Bacteria; Pseudomonadati; Pseudomonadota; Alphaproteobacteria; Hyphomicrobiales; Methylobacteriaceae	0	0	0	1	1	1	1	1	2	1	1	0	0	0	0	0	0	0	0	0	1	1	0	0	0	0	0	0	0	0	1	0	0	2	0	1	0	0	0	0	1	0	1	0	3	0	0
JCM 18382	Bradyrhizobium sp.	Bacteria; Pseudomonadati; Pseudomonadota; Alphaproteobacteria; Hyphomicrobiales; Nitrobacteraceae	0	0	1	1	3	1	2	2	1	0	2	17	0	0	0	0	0	0	0	0	0	1	0	0	0	0	0	0	0	0	1	0	0	2	0	2	0	0	0	1	1	0	1	0	5	0	0
JCM 21793	Nitratireductor aquibiodomus	Bacteria; Pseudomonadati; Pseudomonadota; Alphaproteobacteria; Hyphomicrobiales; Phyllobacteriaceae	0	0	0	1	1	2	2	3	0	1	0	5	0	0	0	0	0	0	0	0	0	1	0	0	0	0	0	0	0	0	0	0	0	0	0	2	0	0	0	1	0	0	1	0	0	0	0
JCM 30711	Micropepsis pineolensis	Bacteria; Pseudomonadati; Pseudomonadota; Alphaproteobacteria; Micropepsales; Micropepsaceae	0	0	0	1	1	2	1	1	0	0	2	0	0	3	1	0	0	0	0	0	1	5	3	0	0	3	2	2	0	2	1	0	0	1	0	1	1	0	0	0	0	0	0	1	0	0	0
JCM 14636	Piezobacter thermophilus	Bacteria; Pseudomonadati; Pseudomonadota; Alphaproteobacteria; Rhodobacterales; Paracoccaceae	0	0	0	1	1	1	2	2	0	0	0	7	0	0	0	1	1	1	1	0	0	0	0	0	0	0	0	0	0	0	0	0	0	0	0	1	1	0	0	0	0	1	1	0	0	0	0
JCM 21060	Rhodocista centenaria	Bacteria; Pseudomonadati; Pseudomonadota; Alphaproteobacteria; Rhodospirillales; Azospirillaceae	0	0	0	1	2	2	1	1	0	0	0	4	0	1	0	0	0	0	0	0	0	0	0	0	0	0	0	0	0	0	1	0	0	2	0	1	0	0	1	1	0	0	1	0	0	0	0
JCM 19705	Fodinicurvata halophila	Bacteria; Pseudomonadati; Pseudomonadota; Alphaproteobacteria; Rhodospirillales; Fodinicurvataceae	0	0	0	1	2	1	1	1	0	0	1	0	0	1	0	0	0	0	0	0	0	0	0	0	0	0	0	0	0	0	0	0	0	0	0	1	0	1	0	1	0	0	1	0	0	0	0
JCM 17960	Magnetospira thiophila	Bacteria; Pseudomonadati; Pseudomonadota; Alphaproteobacteria; Rhodospirillales; Magnetospiraceae	0	0	0	1	1	1	1	1	1	0	0	0	0	1	0	0	0	0	0	0	0	0	0	0	0	0	0	0	0	0	1	0	0	1	0	1	1	0	0	1	0	0	1	0	0	0	0
JCM 23214	Sneathiella glossodoripedis	Bacteria; Pseudomonadati; Pseudomonadota; Alphaproteobacteria; Sneathiellales; Sneathiellaceae	0	0	1	1	2	2	1	1	0	0	0	15	0	1	0	0	0	0	0	0	0	0	0	0	0	0	0	0	0	0	0	0	0	0	0	1	0	0	0	0	0	0	1	0	0	0	0
JCM 12421	Thiobacter subterraneus	Bacteria; Pseudomonadati; Pseudomonadota; Betaproteobacteria; Burkholderiales	0	0	0	1	1	2	1	2	1	0	0	0	0	1	0	0	0	0	0	0	0	0	0	0	0	0	0	0	0	0	0	0	0	0	0	1	1	0	0	0	1	0	1	0	0	0	0
JCM 16107	Thiomonas islandica	Bacteria; Pseudomonadati; Pseudomonadota; Betaproteobacteria; Burkholderiales	0	1	0	1	1	2	1	2	0	0	0	3	0	1	0	0	0	0	0	0	0	0	0	0	0	0	0	0	0	0	0	0	0	1	0	1	0	0	0	0	1	0	1	0	0	0	0
JCM 18799	Achromobacter sp.	Bacteria; Pseudomonadati; Pseudomonadota; Betaproteobacteria; Burkholderiales; Alcaligenaceae	0	1	2	2	3	2	2	4	1	1	0	15	1	1	0	0	0	0	0	0	0	0	0	0	0	0	0	0	0	0	1	0	0	1	0	1	0	0	0	0	2	1	1	0	0	0	1
JCM 9787	Achromobacter xylosoxidans	Bacteria; Pseudomonadati; Pseudomonadota; Betaproteobacteria; Burkholderiales; Alcaligenaceae	0	1	1	2	3	2	5	4	1	1	0	15	0	1	0	0	0	0	0	0	0	0	0	0	0	0	0	0	0	0	1	0	0	1	0	1	0	0	0	0	1	1	2	0	0	0	1
JCM 20666	Alcaligenes faecalis	Bacteria; Pseudomonadati; Pseudomonadota; Betaproteobacteria; Burkholderiales; Alcaligenaceae	0	0	1	2	1	0	4	1	0	1	1	3	1	1	0	0	0	0	0	0	0	0	0	0	0	0	0	0	0	0	0	0	0	0	0	1	0	0	0	0	1	1	1	0	0	0	1
JCM 10599	Paraburkholderia kururiensis	Bacteria; Pseudomonadati; Pseudomonadota; Betaproteobacteria; Burkholderiales; Burkholderiaceae	0	2	2	2	3	2	2	3	1	2	2	7	0	1	0	0	0	0	0	0	0	1	0	0	0	0	0	0	1	3	1	0	0	1	0	1	0	0	0	1	1	1	1	0	2	0	0
JCM 19000	Silvimonas sp.	Bacteria; Pseudomonadati; Pseudomonadota; Betaproteobacteria; Neisseriales; Chitinibacteraceae	0	2	1	2	2	2	1	2	0	0	1	2	0	3	0	0	0	0	0	0	0	5	3	0	0	0	1	0	0	3	2	0	1	3	5	2	0	0	0	0	1	1	1	1	0	0	0
JCM 12992	Neisseria mucosa	Bacteria; Pseudomonadati; Pseudomonadota; Betaproteobacteria; Neisseriales; Neisseriaceae	0	0	0	1	1	2	2	1	0	0	1	0	0	1	0	0	0	0	0	0	0	0	0	0	0	0	0	0	0	0	0	0	0	1	0	1	0	0	1	0	2	1	0	1	0	0	0
JCM 2850	Methylobacillus glycogenes	Bacteria; Pseudomonadati; Pseudomonadota; Betaproteobacteria; Nitrosomonadales; Methylophilaceae	0	0	0	1	1	2	1	2	0	1	0	0	0	0	0	0	0	0	0	0	1	0	0	0	0	0	0	0	0	0	1	0	0	1	0	1	0	0	0	0	0	0	1	0	6	0	1
JCM 15047	Thiobacillus thiophilus	Bacteria; Pseudomonadati; Pseudomonadota; Betaproteobacteria; Nitrosomonadales; Thiobacillaceae	0	0	0	1	1	2	1	2	0	1	0	0	0	1	0	0	0	0	0	0	0	0	0	0	0	0	0	0	0	0	1	0	0	4	0	1	0	0	0	1	2	0	1	0	0	0	0
JCM 12309	Thauera sp.	Bacteria; Pseudomonadati; Pseudomonadota; Betaproteobacteria; Rhodocyclales; Zoogloeaceae	0	2	0	2	2	2	1	2	0	1	1	3	0	1	0	1	1	1	1	0	0	0	0	0	0	0	0	0	0	0	0	0	0	1	0	1	1	0	0	2	1	0	1	0	1	0	0
JCM 14267	Alkalimonas collagenimarina	Bacteria; Pseudomonadati; Pseudomonadota; Gammaproteobacteria	0	2	0	1	2	2	1	1	1	0	0	4	0	1	0	0	0	0	0	0	0	3	0	0	0	0	0	0	0	0	0	0	1	1	1	4	0	0	0	0	0	0	1	0	0	0	0
JCM 14758	Shewanella algae	Bacteria; Pseudomonadati; Pseudomonadota; Gammaproteobacteria; Alteromonadales; Shewanellaceae	0	0	0	1	1	1	3	2	1	1	2	3	0	1	0	0	0	0	0	0	0	0	0	0	0	0	0	0	0	0	0	0	0	1	0	2	0	0	0	1	1	1	1	1	0	0	0
JCM 15074	Shewanella marina	Bacteria; Pseudomonadati; Pseudomonadota; Gammaproteobacteria; Alteromonadales; Shewanellaceae	0	0	0	1	1	2	2	1	1	1	5	4	0	1	0	0	0	0	0	0	0	0	0	0	0	0	0	0	0	0	0	0	0	0	0	2	0	0	0	0	1	1	1	1	1	0	0
JCM 17961	Endothiovibrio diazotrophicus	Bacteria; Pseudomonadati; Pseudomonadota; Gammaproteobacteria; Chromatiales; Thioalkalispiraceae	0	0	0	1	2	4	1	1	0	1	0	0	0	1	0	0	0	0	0	0	0	0	0	0	0	0	0	0	0	0	0	0	0	1	0	2	1	0	0	1	1	0	1	0	0	0	0
JCM 14586	Thioprofundum lithotrophicum	Bacteria; Pseudomonadati; Pseudomonadota; Gammaproteobacteria; Chromatiales; Thioprofundaceae	0	0	0	1	1	2	1	2	1	0	0	1	0	1	0	0	0	0	0	0	0	0	0	0	0	0	0	0	0	0	0	0	0	0	0	1	0	0	0	0	1	0	1	0	0	0	0
JCM 20135	Escherichia coli	Bacteria; Pseudomonadati; Pseudomonadota; Gammaproteobacteria; Enterobacterales; Enterobacteriaceae	0	2	0	1	3	2	2	1	0	1	3	2	0	1	0	0	0	0	0	0	1	1	0	1	0	0	1	0	0	3	2	0	0	1	1	1	0	0	0	0	3	3	1	2	0	0	0
JCM 20051	Raoultella sp.	Bacteria; Pseudomonadati; Pseudomonadota; Gammaproteobacteria; Enterobacterales; Enterobacteriaceae	0	1	1	1	4	2	2	1	0	1	1	3	1	1	0	0	0	0	0	0	2	3	0	0	0	0	0	2	0	3	2	0	1	1	1	2	0	0	1	0	3	1	1	2	0	0	0
JCM 6977	Salmonella enterica subsp. enterica	Bacteria; Pseudomonadati; Pseudomonadota; Gammaproteobacteria; Enterobacterales; Enterobacteriaceae	0	0	0	1	3	2	2	1	0	1	2	2	0	2	1	0	0	0	0	0	1	1	0	0	0	0	2	0	0	0	1	0	0	2	1	1	0	0	0	0	3	3	1	2	0	0	0
JCM 19379	Methyloparacoccus murrellii	Bacteria; Pseudomonadati; Pseudomonadota; Gammaproteobacteria; Methylococcales; Methylococcaceae	0	0	1	1	1	2	1	3	0	0	0	0	0	1	0	0	0	0	0	0	0	1	0	0	0	0	0	0	0	0	0	0	0	1	0	1	0	0	0	0	1	1	1	0	2	0	0
JCM 14076	Methylosoma difficile	Bacteria; Pseudomonadati; Pseudomonadota; Gammaproteobacteria; Methylococcales; Methylococcaceae	0	0	0	1	1	2	1	2	0	0	0	0	0	1	0	0	0	0	0	0	1	1	0	0	0	0	0	0	0	0	0	0	0	1	0	1	0	0	0	1	1	0	1	0	2	0	0
JCM 13664	Methylothermus subterraneus	Bacteria; Pseudomonadati; Pseudomonadota; Gammaproteobacteria; Methylococcales; Methylothermaceae	0	0	0	1	1	2	1	2	1	1	0	1	0	1	0	0	0	0	0	0	1	0	0	0	0	0	0	0	0	0	0	0	0	1	0	1	1	0	0	0	1	0	1	0	1	0	0
JCM 18900	Psychrobacter sp.	Bacteria; Pseudomonadati; Pseudomonadota; Gammaproteobacteria; Moraxellales; Moraxellaceae	0	0	0	1	1	1	2	2	0	1	0	4	0	0	0	0	0	0	0	0	0	0	0	0	0	0	0	0	0	0	0	0	0	0	0	1	0	0	0	0	1	1	1	0	0	0	0
JCM 18901	Psychrobacter sp.	Bacteria; Pseudomonadati; Pseudomonadota; Gammaproteobacteria; Moraxellales; Moraxellaceae	0	0	0	1	1	1	2	2	0	1	0	3	0	0	0	0	0	0	0	0	0	0	0	0	0	0	0	0	0	0	0	0	0	0	0	1	0	0	0	0	1	1	1	0	0	0	0
JCM 18902	Psychrobacter sp.	Bacteria; Pseudomonadati; Pseudomonadota; Gammaproteobacteria; Moraxellales; Moraxellaceae	0	0	0	1	1	1	2	2	0	1	0	3	0	0	0	0	0	0	0	0	0	0	0	0	0	0	0	0	0	0	0	0	0	0	0	1	0	0	0	0	1	1	1	0	0	0	0
JCM 18903	Psychrobacter sp.	Bacteria; Pseudomonadati; Pseudomonadota; Gammaproteobacteria; Moraxellales; Moraxellaceae	0	0	0	1	1	1	2	2	0	1	0	3	0	0	0	0	0	0	0	0	0	0	0	0	0	0	0	0	0	0	0	0	0	0	0	1	0	0	0	0	1	1	1	0	0	0	0
JCM 16084	Halomonas beimenensis	Bacteria; Pseudomonadati; Pseudomonadota; Gammaproteobacteria; Oceanospirillales; Halomonadaceae	0	0	0	1	1	3	1	1	0	1	1	4	3	1	0	0	0	0	0	0	0	0	0	0	0	0	0	0	0	0	0	0	0	0	0	1	0	1	0	1	1	2	1	0	0	0	0
JCM 16914	Halomonas cibimaris	Bacteria; Pseudomonadati; Pseudomonadota; Gammaproteobacteria; Oceanospirillales; Halomonadaceae	0	0	0	1	1	2	1	1	0	1	1	1	0	1	0	0	0	0	0	0	0	0	0	0	0	0	0	0	0	0	0	0	0	0	0	1	0	0	0	1	0	0	1	0	0	0	0
JCM 30151	Halomonas garicola	Bacteria; Pseudomonadati; Pseudomonadota; Gammaproteobacteria; Oceanospirillales; Halomonadaceae	0	0	0	1	1	2	1	1	0	2	0	2	0	1	0	0	0	0	0	0	0	0	0	0	0	0	0	0	0	0	0	0	0	0	0	1	0	0	0	1	0	1	1	0	0	0	0
JCM 14803	Halomonas salifodinae	Bacteria; Pseudomonadati; Pseudomonadota; Gammaproteobacteria; Oceanospirillales; Halomonadaceae	0	1	0	1	1	3	1	1	0	1	0	4	4	1	0	0	0	0	0	0	0	0	0	0	0	0	0	0	0	0	1	0	0	0	0	1	0	0	0	1	1	0	1	0	0	0	0
JCM 21221	Halomonas salina	Bacteria; Pseudomonadati; Pseudomonadota; Gammaproteobacteria; Oceanospirillales; Halomonadaceae	0	0	0	1	1	2	1	2	0	1	0	4	0	1	0	0	0	0	0	0	0	0	0	0	0	0	0	0	0	0	0	0	0	0	0	1	0	0	0	1	0	0	1	0	0	0	0
JCM 19368	Halomonas shantousis	Bacteria; Pseudomonadati; Pseudomonadota; Gammaproteobacteria; Oceanospirillales; Halomonadaceae	0	0	0	1	1	2	1	1	0	1	0	6	1	1	0	0	0	0	0	0	0	1	0	0	0	0	0	0	0	0	1	0	0	2	0	1	0	0	0	1	0	0	1	0	1	0	1
JCM 20774	Marinomonas vaga	Bacteria; Pseudomonadati; Pseudomonadota; Gammaproteobacteria; Oceanospirillales; Oceanospirillaceae	0	1	1	1	1	1	3	1	1	1	0	0	0	0	0	0	0	0	0	0	0	1	0	0	0	0	0	0	0	0	0	0	0	1	0	0	0	0	0	0	1	1	1	0	0	0	0
JCM 2434	Aggregatibacter actinomycetemcomitans	Bacteria; Pseudomonadati; Pseudomonadota; Gammaproteobacteria; Pasteurellales; Pasteurellaceae	0	0	0	1	0	1	1	2	0	0	1	0	0	0	0	0	0	0	0	0	0	0	0	0	0	0	0	0	0	0	1	0	0	1	0	2	0	0	0	0	1	1	0	1	0	0	0
JCM 12291	Marinobacter alkaliphilus	Bacteria; Pseudomonadati; Pseudomonadota; Gammaproteobacteria; Pseudomonadales; Marinobacteraceae	0	0	0	1	1	2	1	2	0	1	1	8	0	1	0	0	0	0	0	0	0	0	0	0	0	0	0	0	0	0	2	0	1	0	0	0	0	0	0	0	1	1	1	0	1	0	0
JCM 21475	Azotobacter vinelandii	Bacteria; Pseudomonadati; Pseudomonadota; Gammaproteobacteria; Pseudomonadales; Pseudomonadaceae	0	1	0	1	2	2	2	2	0	1	1	4	0	1	0	0	0	0	0	0	1	0	0	0	0	0	0	0	0	0	1	1	0	1	0	1	0	0	0	0	3	2	2	0	0	0	0
JCM 20301	Pseudomonas aeruginosa	Bacteria; Pseudomonadati; Pseudomonadota; Gammaproteobacteria; Pseudomonadales; Pseudomonadaceae	0	3	1	1	2	2	2	3	0	0	1	13	1	1	0	0	0	0	0	0	0	1	0	0	0	0	0	0	0	0	1	0	0	1	0	1	0	0	0	0	1	1	2	0	1	0	0
JCM 6156	Pseudomonas putida	Bacteria; Pseudomonadati; Pseudomonadota; Gammaproteobacteria; Pseudomonadales; Pseudomonadaceae	0	2	0	1	2	2	2	1	0	2	2	7	2	1	0	0	0	0	0	0	1	1	0	0	0	0	0	0	0	0	1	0	0	1	0	1	0	0	0	0	0	1	2	0	2	0	0
JCM 15514	Salinisphaera hydrothermalis	Bacteria; Pseudomonadati; Pseudomonadota; Gammaproteobacteria; Salinisphaerales; Salinisphaeraceae	0	0	0	2	1	1	1	1	0	2	0	5	0	0	0	0	0	0	0	0	0	0	0	0	0	0	0	0	0	0	0	0	0	0	0	1	0	0	1	0	1	0	1	0	0	0	0
JCM 17795	Galenea microaerophila	Bacteria; Pseudomonadati; Pseudomonadota; Gammaproteobacteria; Thiotrichales; Piscirickettsiaceae	0	0	0	1	1	1	1	2	0	0	0	0	0	0	0	0	0	0	0	0	0	0	0	0	0	0	0	0	0	0	0	0	0	0	0	1	0	0	0	0	0	0	1	0	0	0	0
JCM 12397	Hydrogenovibrio thermophilus	Bacteria; Pseudomonadati; Pseudomonadota; Gammaproteobacteria; Thiotrichales; Piscirickettsiaceae	0	0	0	1	1	3	1	2	0	0	0	0	0	0	0	0	0	0	0	0	0	0	0	0	0	0	0	0	0	0	0	0	0	0	0	1	0	0	0	0	1	1	1	0	0	0	0
JCM 30760	Thiomicrorhabdus hydrogeniphila	Bacteria; Pseudomonadati; Pseudomonadota; Gammaproteobacteria; Thiotrichales; Piscirickettsiaceae	0	0	0	1	1	2	1	2	1	1	0	0	0	0	0	0	0	0	0	0	0	0	0	0	0	0	0	0	0	0	0	0	0	0	0	1	0	0	0	1	0	0	1	0	0	0	0
JCM 18905	Vibrio sp.	Bacteria; Pseudomonadati; Pseudomonadota; Gammaproteobacteria; Vibrionales; Vibrionaceae	0	0	1	1	1	2	2	1	1	1	2	4	0	1	0	0	0	0	0	0	1	0	0	0	0	0	0	0	1	2	5	0	1	1	3	3	0	0	0	0	2	1	1	1	0	0	0
JCM 10831	Hydrogenophilus hirschii	Bacteria; Pseudomonadati; Pseudomonadota; Hydrogenophilia; Hydrogenophilales; Hydrogenophilaceae	0	0	0	1	1	2	1	2	0	0	0	3	0	0	0	0	0	0	0	0	0	0	0	0	0	0	0	0	0	0	0	0	0	0	0	1	0	0	0	2	1	0	1	0	0	0	0
JCM 16106	Hydrogenophilus islandicus	Bacteria; Pseudomonadati; Pseudomonadota; Hydrogenophilia; Hydrogenophilales; Hydrogenophilaceae	0	0	0	1	1	1	1	2	0	0	0	3	0	1	0	0	0	0	0	0	0	0	0	0	0	0	0	0	0	0	0	0	0	0	0	1	0	0	0	1	1	0	1	0	0	0	0
JCM 9785	Rhodothermus marinus	Bacteria; Pseudomonadati; Rhodothermota; Rhodothermia; Rhodothermales; Rhodothermaceae	0	1	0	1	0	3	2	1	0	0	0	3	0	0	0	0	0	0	0	0	1	4	2	1	0	2	1	1	0	1	1	0	0	1	1	3	1	0	2	1	0	0	1	0	0	0	0
JCM 31343	Longimonas haloalkaliphila	Bacteria; Pseudomonadati; Rhodothermota; Rhodothermia; Rhodothermales; Salinibacteraceae	0	1	0	1	0	2	1	1	0	1	0	3	0	0	0	0	0	0	0	0	0	1	0	0	0	0	0	0	0	0	3	0	1	2	0	2	0	0	1	1	0	0	1	0	0	0	0
JCM 31342	Natronotalea proteinilytica	Bacteria; Pseudomonadati; Rhodothermota; Rhodothermia; Rhodothermales; Salisaetaceae	0	1	0	1	0	2	1	1	0	1	0	3	0	0	0	0	0	0	0	0	0	0	0	0	0	0	0	0	0	0	3	0	1	2	0	1	0	0	1	1	0	0	1	0	0	0	0
JCM 14728	Exilispira thermophila	Bacteria; Pseudomonadati; Spirochaetota; Spirochaetia; Spirochaetales	0	0	1	0	1	0	1	0	0	0	0	0	0	0	0	0	0	0	0	0	0	0	0	0	0	0	0	0	0	0	0	1	0	0	0	0	1	0	0	0	1	1	0	0	0	0	0
JCM 31475	Pleomorphochaeta caudata	Bacteria; Pseudomonadati; Spirochaetota; Spirochaetia; Spirochaetales; Sphaerochaetaceae	0	0	0	1	1	1	0	1	0	0	1	0	0	0	0	0	0	0	0	0	0	4	1	0	0	0	0	1	0	2	0	0	0	0	0	0	0	0	0	0	1	1	0	1	0	0	0
JCM 31871	Pleomorphochaeta naphthae	Bacteria; Pseudomonadati; Spirochaetota; Spirochaetia; Spirochaetales; Sphaerochaetaceae	0	0	0	1	1	1	0	1	0	0	1	0	0	0	0	0	0	0	0	0	1	3	0	0	0	0	1	0	1	1	0	0	0	0	0	0	0	0	0	0	1	1	0	1	0	0	0
JCM 12856	Spirochaeta dissipatitropha	Bacteria; Pseudomonadati; Spirochaetota; Spirochaetia; Spirochaetales; Spirochaetaceae	0	0	1	1	0	1	0	1	0	0	1	0	0	0	0	0	0	0	0	0	3	7	1	1	0	1	1	3	1	2	1	0	2	2	1	4	0	0	1	0	2	1	0	1	0	0	0
JCM 30394	Deferrisoma palaeochoriense	Bacteria; Pseudomonadati; Thermodesulfobacteriota; Deferrisomatia; Deferrisomatales; Deferrisomataceae	0	0	0	0	1	2	2	2	1	0	0	7	0	2	0	0	0	1	1	0	0	0	0	0	0	0	0	0	0	0	0	0	0	0	0	1	1	0	0	0	0	0	2	0	0	0	0
JCM 19179	Desulfatiglans parachlorophenolica	Bacteria; Pseudomonadati; Thermodesulfobacteriota; Desulfobacteria; Desulfatiglandales; Desulfatiglandaceae	0	0	0	1	1	1	1	2	0	0	0	13	0	1	0	0	0	1	1	0	1	0	0	0	0	0	0	0	0	0	0	0	0	1	0	1	1	0	1	2	0	1	2	0	0	0	0
JCM 14469	Desulfatiferula olefinivorans	Bacteria; Pseudomonadati; Thermodesulfobacteriota; Desulfobacteria; Desulfobacterales; Desulfobacteraceae	0	0	0	1	1	2	1	1	0	0	0	1	0	1	0	0	0	0	0	0	0	0	0	0	0	0	0	0	0	0	0	0	0	0	0	1	0	0	0	2	2	2	0	0	0	0	0
JCM 12294	Desulfocicer niacini	Bacteria; Pseudomonadati; Thermodesulfobacteriota; Desulfobacteria; Desulfobacterales; Desulfobacteraceae	0	2	2	2	2	1	1	2	1	0	1	6	0	1	0	0	0	0	0	0	0	0	0	0	0	0	0	0	0	0	0	0	0	0	0	1	2	0	0	2	1	2	1	0	0	0	0
JCM 16085	Desulfoconvexum algidum	Bacteria; Pseudomonadati; Thermodesulfobacteriota; Desulfobacteria; Desulfobacterales; Desulfobacteraceae	0	0	2	1	3	1	1	3	0	0	1	6	0	1	0	0	1	0	0	0	1	0	0	0	0	0	0	0	0	0	0	0	0	0	0	1	1	0	0	3	1	3	2	0	0	0	0
JCM 12296	Desulfosarcina cetonica	Bacteria; Pseudomonadati; Thermodesulfobacteriota; Desulfobacteria; Desulfobacterales; Desulfosarcinaceae	0	2	1	1	2	1	1	1	0	0	1	10	0	3	0	0	0	0	0	0	0	0	0	0	0	0	0	0	0	0	1	0	0	0	0	1	0	0	0	3	0	1	2	0	0	0	0
JCM 39068	Desulfocastanea catecholica	Bacteria; Pseudomonadati; Thermodesulfobacteriota; Desulfobulbia; Desulfobulbales; Desulfobulbaceae	0	1	0	1	1	3	2	1	0	0	1	9	0	2	0	0	0	0	0	0	0	0	0	0	0	0	0	0	0	0	1	0	0	2	0	1	0	0	0	1	1	3	1	0	0	0	0
JCM 19994	Desulfogranum aggregans	Bacteria; Pseudomonadati; Thermodesulfobacteriota; Desulfobulbia; Desulfobulbales; Desulfobulbaceae	0	2	1	1	1	2	2	1	0	0	3	2	0	1	0	0	0	0	0	0	0	0	0	0	0	0	0	0	0	0	0	1	0	1	0	1	1	0	0	2	1	2	1	0	0	0	0
JCM 14714	Desulfomicrobium aestuarii	Bacteria; Pseudomonadati; Thermodesulfobacteriota; Desulfovibrionia; Desulfovibrionales; Desulfomicrobiaceae	0	0	2	0	1	2	2	1	0	0	1	0	0	1	0	0	0	0	0	0	0	0	0	0	0	0	0	0	0	0	0	0	0	0	0	1	0	0	0	0	1	1	2	0	0	0	0
JCM 14713	Desulfomicrobium salsuginis	Bacteria; Pseudomonadati; Thermodesulfobacteriota; Desulfovibrionia; Desulfovibrionales; Desulfomicrobiaceae	0	0	2	0	1	2	2	2	0	0	1	0	0	1	0	0	0	0	0	0	0	0	0	0	0	0	0	0	0	0	0	0	0	0	0	1	0	0	0	0	1	1	2	0	0	0	0
JCM 31598	Desulfonatronum parangueonense	Bacteria; Pseudomonadati; Thermodesulfobacteriota; Desulfovibrionia; Desulfovibrionales; Desulfonatronaceae	0	0	0	0	1	2	2	1	0	0	1	0	0	1	0	0	0	0	0	0	0	0	0	0	0	0	0	0	0	0	1	0	0	1	0	2	0	0	1	0	1	1	1	0	0	0	0
JCM 13028	Desulfonauticus autotrophicus	Bacteria; Pseudomonadati; Thermodesulfobacteriota; Desulfovibrionia; Desulfovibrionales; Desulfonauticaceae	0	0	0	0	1	1	2	1	0	0	0	0	0	1	0	0	0	0	0	0	0	0	0	0	0	0	0	0	0	0	0	0	0	0	0	0	1	0	0	1	0	0	1	0	0	0	0
JCM 12298	Desulfothermus naphthae	Bacteria; Pseudomonadati; Thermodesulfobacteriota; Desulfovibrionia; Desulfovibrionales; Desulfothermaceae	0	0	0	0	1	1	2	1	0	0	0	6	0	1	0	0	0	0	0	0	0	0	0	0	0	0	0	0	0	0	0	0	0	0	0	0	0	0	0	0	0	0	1	0	0	0	0
JCM 13304	Desulfothermus okinawensis	Bacteria; Pseudomonadati; Thermodesulfobacteriota; Desulfovibrionia; Desulfovibrionales; Desulfothermaceae	0	0	0	0	1	1	2	1	0	0	0	4	0	1	0	0	1	0	0	0	0	0	0	0	0	0	0	0	0	0	0	0	0	0	0	0	1	0	0	1	0	0	1	0	0	0	0
JCM 16814	Desulfobaculum senezii	Bacteria; Pseudomonadati; Thermodesulfobacteriota; Desulfovibrionia; Desulfovibrionales; Desulfovibrionaceae	0	0	0	0	1	1	2	2	0	0	1	0	0	1	0	0	0	0	0	0	0	0	0	0	0	0	0	0	0	0	1	0	0	0	0	1	0	0	1	1	1	1	2	0	0	0	0
JCM 18546	Desulfocurvus thunnarius	Bacteria; Pseudomonadati; Thermodesulfobacteriota; Desulfovibrionia; Desulfovibrionales; Desulfovibrionaceae	0	2	1	0	1	1	2	1	0	0	0	0	0	1	0	0	0	0	0	0	0	0	0	0	0	0	0	0	0	0	0	0	0	0	0	1	0	0	1	0	1	1	2	0	0	0	0
JCM 30146	Desulfovibrio biadhensis	Bacteria; Pseudomonadati; Thermodesulfobacteriota; Desulfovibrionia; Desulfovibrionales; Desulfovibrionaceae	0	4	1	0	1	1	2	3	0	0	0	0	0	1	0	0	0	0	0	0	0	0	0	0	0	0	0	0	0	0	2	0	0	0	0	0	1	0	1	1	1	2	2	0	0	0	0
JCM 12178	Desulfovibrio brasiliensis	Bacteria; Pseudomonadati; Thermodesulfobacteriota; Desulfovibrionia; Desulfovibrionales; Desulfovibrionaceae	0	0	1	0	2	1	2	2	0	0	0	0	0	1	0	0	0	0	0	0	0	0	0	0	0	0	0	0	0	0	1	0	0	0	0	1	1	0	0	2	2	2	2	0	0	0	0
JCM 16812	Desulfovibrio simplex	Bacteria; Pseudomonadati; Thermodesulfobacteriota; Desulfovibrionia; Desulfovibrionales; Desulfovibrionaceae	0	0	1	0	1	1	2	1	1	0	1	0	0	1	0	0	0	0	0	0	0	0	0	0	0	0	0	0	0	0	1	0	0	0	0	0	0	0	0	0	1	1	1	0	0	0	0
JCM 15519	Fundidesulfovibrio butyratiphilus	Bacteria; Pseudomonadati; Thermodesulfobacteriota; Desulfovibrionia; Desulfovibrionales; Desulfovibrionaceae	0	0	0	0	1	1	2	3	0	0	1	2	0	1	0	0	0	0	0	0	1	0	1	0	0	0	0	0	0	0	1	0	0	0	0	1	0	0	0	1	1	1	0	0	0	0	0
JCM 15971	Halodesulfovibrio oceani subsp. galateae	Bacteria; Pseudomonadati; Thermodesulfobacteriota; Desulfovibrionia; Desulfovibrionales; Desulfovibrionaceae	0	0	0	0	1	1	2	1	0	0	3	0	0	1	0	0	0	0	0	0	0	0	0	0	0	0	0	0	0	0	1	0	0	0	1	1	0	0	0	0	1	2	2	0	0	0	0
JCM 15970	Halodesulfovibrio oceani subsp. oceani	Bacteria; Pseudomonadati; Thermodesulfobacteriota; Desulfovibrionia; Desulfovibrionales; Desulfovibrionaceae	0	0	0	0	1	1	2	1	0	0	3	0	0	1	0	0	0	0	0	0	0	0	0	0	0	0	0	0	0	0	1	0	0	0	0	1	0	0	0	0	1	2	2	0	0	0	0
JCM 14124	Humidesulfovibrio idahonensis	Bacteria; Pseudomonadati; Thermodesulfobacteriota; Desulfovibrionia; Desulfovibrionales; Desulfovibrionaceae	0	0	1	0	1	1	2	2	0	0	0	0	0	1	0	0	0	0	0	0	0	0	0	0	0	0	0	0	0	0	0	0	0	0	0	1	0	0	1	2	1	1	2	0	0	0	0
JCM 31065	Maridesulfovibrio salinus	Bacteria; Pseudomonadati; Thermodesulfobacteriota; Desulfovibrionia; Desulfovibrionales; Desulfovibrionaceae	0	0	1	0	2	1	2	1	0	0	1	0	0	1	0	0	0	0	0	0	0	0	0	0	0	0	0	0	0	0	0	0	0	0	0	1	0	0	1	2	1	2	3	0	0	0	0
JCM 14635	Megalodesulfovibrio paquesii	Bacteria; Pseudomonadati; Thermodesulfobacteriota; Desulfovibrionia; Desulfovibrionales; Desulfovibrionaceae	0	2	1	0	1	2	2	2	0	0	1	0	0	1	0	0	0	0	0	0	0	0	0	0	0	0	0	0	0	0	1	0	0	0	0	1	0	0	0	0	1	1	2	0	0	0	0
JCM 14040	Oceanidesulfovibrio marinus	Bacteria; Pseudomonadati; Thermodesulfobacteriota; Desulfovibrionia; Desulfovibrionales; Desulfovibrionaceae	0	1	1	0	1	1	2	2	0	0	1	0	0	1	0	0	0	0	0	0	0	0	0	0	0	0	0	0	0	0	2	0	0	1	0	1	0	0	1	1	2	1	2	0	0	0	0
JCM 15785	Oleidesulfovibrio vietnamensis	Bacteria; Pseudomonadati; Thermodesulfobacteriota; Desulfovibrionia; Desulfovibrionales; Desulfovibrionaceae	0	0	2	0	1	1	2	1	0	0	1	0	0	1	0	0	0	0	0	0	0	0	0	0	0	0	0	0	0	0	1	0	0	0	0	1	0	0	0	0	1	1	2	0	0	0	0
JCM 30471	Desulfuromonas carbonis	Bacteria; Pseudomonadati; Thermodesulfobacteriota; Desulfuromonadia; Desulfuromonadales; Desulfuromonadaceae	0	0	0	0	1	2	1	1	0	0	0	3	0	1	0	0	0	0	0	0	0	0	0	0	0	0	0	0	0	0	0	1	0	0	0	0	1	0	0	0	1	2	0	0	0	0	0
JCM 12927	Desulfuromonas svalbardensis	Bacteria; Pseudomonadati; Thermodesulfobacteriota; Desulfuromonadia; Desulfuromonadales; Desulfuromonadaceae	0	2	0	0	1	2	1	2	0	0	1	1	0	1	0	0	0	0	0	0	0	0	0	0	0	0	0	0	0	0	0	0	0	0	0	0	0	0	0	0	3	2	0	0	0	0	0
JCM 12926	Desulfuromusa ferrireducens	Bacteria; Pseudomonadati; Thermodesulfobacteriota; Desulfuromonadia; Desulfuromonadales; Desulfuromonadaceae	0	2	0	1	1	1	1	1	0	0	1	1	0	1	0	0	0	0	0	0	0	0	0	0	0	0	0	0	0	0	1	0	0	0	0	0	0	0	0	0	1	3	0	0	0	0	0
JCM 15764	Geotalea toluenoxydans	Bacteria; Pseudomonadati; Thermodesulfobacteriota; Desulfuromonadia; Geobacterales; Geobacteraceae	0	0	0	0	1	2	1	1	0	0	1	3	0	2	0	0	0	0	0	0	0	0	0	0	0	0	0	0	0	0	1	0	0	0	0	0	0	0	1	0	2	3	0	0	0	0	0
JCM 16410	Desulfosoma profundi	Bacteria; Pseudomonadati; Thermodesulfobacteriota; Syntrophobacteria; Syntrophobacterales; Syntrophobacteraceae	0	2	0	1	1	1	2	1	0	0	1	7	0	1	0	0	0	0	0	0	1	0	0	0	0	0	0	0	0	0	0	0	0	0	0	1	3	0	0	2	0	0	1	0	0	0	0
JCM 14805	Prosthecobacter fluviatilis	Bacteria; Pseudomonadati; Verrucomicrobiota; Verrucomicrobiia; Verrucomicrobiales; Verrucomicrobiaceae	0	0	0	0	1	1	1	1	0	0	0	0	0	0	0	0	0	0	0	0	0	0	0	0	0	0	0	0	1	0	1	0	0	1	1	1	0	0	0	1	0	0	1	0	0	0	0
JCM 15963	Rhabdothermus arcticus	Bacteria; Thermotogati; Deinococcota; Deinococci; Thermales; Thermaceae	1	0	1	0	2	1	1	1	0	0	0	4	0	1	0	0	0	0	0	0	0	1	0	0	0	0	0	0	0	0	0	0	0	0	0	1	1	0	0	0	1	0	1	0	0	0	0
JCM 11602	Thermus brockianus	Bacteria; Thermotogati; Deinococcota; Deinococci; Thermales; Thermaceae	0	0	1	0	2	1	1	1	0	0	0	5	0	1	0	0	0	0	0	0	1	1	0	0	0	0	0	0	0	1	0	0	0	0	0	0	0	0	0	0	0	0	2	0	0	0	0
JCM 12314	Thermus kawarayensis	Bacteria; Thermotogati; Deinococcota; Deinococci; Thermales; Thermaceae	0	0	1	0	2	1	1	1	0	0	0	7	0	1	0	0	0	0	0	0	0	1	0	0	0	0	0	0	0	0	0	1	0	0	0	1	0	0	0	0	0	0	2	0	0	0	0
JCM 11956	Vulcanithermus mediatlanticus	Bacteria; Thermotogati; Deinococcota; Deinococci; Thermales; Thermaceae	0	1	1	0	2	1	1	1	0	0	0	5	0	1	0	0	0	0	0	0	0	0	0	0	0	0	0	0	0	0	0	0	0	0	0	0	1	0	0	0	1	0	2	0	0	0	0
JCM 19320	Aminobacterium thunnarium	Bacteria; Thermotogati; Synergistota; Synergistia; Synergistales; Aminobacteriaceae	0	0	5	0	0	0	2	0	0	0	0	0	0	0	0	0	0	0	0	0	0	0	0	0	0	0	0	0	0	0	0	0	0	0	0	0	1	0	0	0	1	0	0	0	0	0	0
JCM 17151	Lactivibrio alcoholicus	Bacteria; Thermotogati; Synergistota; Synergistia; Synergistales; Aminobacteriaceae	0	0	4	0	0	0	4	1	0	0	0	0	0	0	0	0	0	0	0	0	0	0	0	0	0	0	0	0	0	0	0	0	0	0	0	1	0	0	0	0	0	0	0	0	0	0	0
JCM 18154	Mesotoga infera	Bacteria; Thermotogati; Thermotogota; Thermotogae; Kosmotogales; Kosmotogaceae	0	0	1	0	0	0	1	0	0	0	0	0	0	0	0	0	0	0	0	0	0	1	2	0	0	0	0	0	0	2	1	0	1	0	0	2	0	0	0	0	1	0	0	0	0	0	0
JCM 17210	Defluviitoga tunisiensis	Bacteria; Thermotogati; Thermotogota; Thermotogae; Petrotogales; Petrotogaceae	0	0	1	0	1	0	0	1	0	0	0	0	0	0	0	0	0	0	0	0	0	6	3	0	0	0	1	0	1	1	3	0	1	1	1	3	1	0	1	0	1	0	0	0	0	0	0
JCM 30566	Marinitoga arctica	Bacteria; Thermotogati; Thermotogota; Thermotogae; Petrotogales; Petrotogaceae	0	0	1	0	0	0	0	0	0	0	0	0	0	0	0	0	0	0	0	0	0	1	0	0	0	0	0	0	0	0	2	0	1	1	0	0	1	0	0	0	1	0	0	0	0	0	0
JCM 13303	Marinitoga okinawensis	Bacteria; Thermotogati; Thermotogota; Thermotogae; Petrotogales; Petrotogaceae	0	0	1	0	0	0	0	0	0	0	0	0	0	0	0	0	0	0	0	0	0	1	0	0	0	0	0	0	0	0	0	0	1	1	0	1	1	0	0	0	1	0	0	0	0	0	0
[truncated: 4,997 more columns]
