# Supplementary material
Source: HighWire-hosted journal article supplement (doi:10.1101/gr.281026.125)
Supplement: Supplemental_Table_S6.xlsx [file Supplemental_Table_S6.xlsx]

## Sheet: TableS6
Supplemental Table S6. List of autotrophic and potentially autotrophic 67 strains.
			CBB			WL			r/roTCA
JCM number	Scientific name	Taxonomy (ICNP-based)	RuBisCO, PRK	%Completeness		CODH/ACS	%Completeness		CCS,CCL / ACL	OFOR	%Completeness		Potential carbon fixation pathway	Autotrophic growth	Reference (DOI or Pubmed ID)
JCM 15416	Methanobacterium flexile	Archaea; Methanobacteriati; Methanobacteriota; Methanobacteria; Methanobacteriales; Methanobacteriaceae	N	61		Y	66		N	N	80		WL	YES	21278411
JCM 15797	Methanobacterium kanagiense	Archaea; Methanobacteriati; Methanobacteriota; Methanobacteria; Methanobacteriales; Methanobacteriaceae	N	61		Y	83		N	N	70		WL	YES	20639228
JCM 15415	Methanobacterium movens	Archaea; Methanobacteriati; Methanobacteriota; Methanobacteria; Methanobacteriales; Methanobacteriaceae	N	61		Y	83		N	N	80		WL	YES	21278411
JCM 18470	Methanobacterium movilense	Archaea; Methanobacteriati; Methanobacteriota; Methanobacteria; Methanobacteriales; Methanobacteriaceae	N	61		Y	83		N	N	80		WL	YES	24108325
JCM 10723	Methanothermus sociabilis	Archaea; Methanobacteriati; Methanobacteriota; Methanobacteria; Methanobacteriales; Methanothermaceae	N	61		Y	83		N	N	70		WL	YES	10.1016/S0723-2020(86)80156-4
JCM 11886	Methanocaldococcus indicus	Archaea; Methanobacteriati; Methanobacteriota; Methanococci; Methanococcales; Methanocaldococcaceae	N	84		Y	83		N	N	60		WL	YES	14657125
JCM 10627	Methanocalculus pumilus	Archaea; Methanobacteriati; Methanobacteriota; Methanomicrobia; Methanomicrobiales; Methanocalculaceae	N	69		Y	66		N	N	50		WL	NO	11034480
JCM 11281	Methanosarcina baltica	Archaea; Methanobacteriati; Methanobacteriota; Methanomicrobia; Methanosarcinales; Methanosarcinaceae	N	69		Y	66		N	N	66		WL	NO	12013430
JCM 15540	Methanosarcina subterranea	Archaea; Methanobacteriati; Methanobacteriota; Methanomicrobia; Methanosarcinales; Methanosarcinaceae	N	61		Y	66		N	N	66		WL	NO	25604340
JCM 9392	Pyrodictium brockii	Archaea; Thermoproteati; Thermoproteota; Thermoprotei; Desulfurococcales; Pyrodictiaceae	N	69		N	0		N	N	44		unknown	YES	23194811
JCM 16369	Mycolicibacterium crocinum	Bacteria; Bacillati; Actinomycetota; Actinomycetes; Mycobacteriales; Mycobacteriaceae	Y	100		N	30		N	N	90		CBB	not tested	19196782
JCM 16370	Mycolicibacterium pallens	Bacteria; Bacillati; Actinomycetota; Actinomycetes; Mycobacteriales; Mycobacteriaceae	Y	100		N	30		N	N	100		CBB	not tested	19196782
JCM 14030	Clostridium nitrophenolicum	Bacteria; Bacillati; Bacillota; Clostridia; Eubacteriales; Clostridiaceae	N	61		Y	90		N	N	77		WL	not tested	17684276
JCM 17205	Blautia faecis	Bacteria; Bacillati; Bacillota; Clostridia; Lachnospirales; Lachnospiraceae	N	53		Y	80		N	N	66		WL	NO	22544782
JCM 17039	Blautia glucerasea	Bacteria; Bacillati; Bacillota; Clostridia; Lachnospirales; Lachnospiraceae	N	53		Y	90		N	N	66		WL	NO	20354843
JCM 17204	Blautia stercoris	Bacteria; Bacillati; Bacillota; Clostridia; Lachnospirales; Lachnospiraceae	N	69		Y	90		N	N	55		WL	NO	21571940
JCM 18507	Fusicatenibacter saccharivorans	Bacteria; Bacillati; Bacillota; Clostridia; Lachnospirales; Lachnospiraceae	N	53		Y	60		N	N	77		WL	NO	23625266
JCM 15765	Desulfitobacterium aromaticivorans	Bacteria; Bacillati; Bacillota; Desulfitobacteriia; Desulfitobacteriales; Desulfitobacteriaceae	N	61		Y	70		N	N	90		WL	NO	19656942
JCM 17380	Desulfosporosinus burensis	Bacteria; Bacillati; Bacillota; Desulfitobacteriia; Desulfitobacteriales; Desulfitobacteriaceae	N	61		Y	70		N	N	90		WL	NO	22544786
JCM 31105	Desulfosporosinus nitroreducens	Bacteria; Bacillati; Bacillota; Desulfitobacteriia; Desulfitobacteriales; Desulfitobacteriaceae	N	61		Y	70		N	N	77		WL	YES	28646634
JCM 14036	Desulfotomaculum defluvii	Bacteria; Bacillati; Bacillota; Desulfotomaculia; Desulfotomaculales; Desulfotomaculaceae	N	76		N	70		N	Y	100		roTCA	NO	23159750
JCM 39194	Desulfotomaculum varum	Bacteria; Bacillati; Bacillota; Desulfotomaculia; Desulfotomaculales; Desulfotomaculaceae	N	53		N	70		N	Y	100		roTCA	NO	22611525
JCM 32836	Desulfosporomusa polytropa	Bacteria; Bacillati; Bacillota; Negativicutes; Selenomonadales; Sporomusaceae	N	76		Y	90		N	N	66		WL	YES	15340785
JCM 13218	Sporomusa intestinalis	Bacteria; Bacillati; Bacillota; Negativicutes; Selenomonadales; Sporomusaceae	N	76		Y	90		N	N	90		WL	YES	24005182
JCM 9492	Aquifex pyrophilus	Bacteria; Pseudomonadati; Aquificota; Aquificia; Aquificales; Aquificaceae	N	69		N	40		Y	N	90		rTCA	YES	10.1016/S0723-2020(11)80206-7
JCM 13302	Hydrogenivirga okinawensis	Bacteria; Pseudomonadati; Aquificota; Aquificia; Aquificales; Aquificaceae	N	69		N	30		Y	N	90		rTCA	YES	18319477
JCM 10560	Hydrogenobacter subterraneus	Bacteria; Pseudomonadati; Aquificota; Aquificia; Aquificales; Aquificaceae	N	69		N	40		Y	N	90		rTCA	NO	11491342
JCM 8795	Hydrogenobaculum acidophilum	Bacteria; Pseudomonadati; Aquificota; Aquificia; Aquificales; Aquificaceae	N	69		N	40		Y	N	100		rTCA	YES	10.1099/00207713-43-4-703.
JCM 12825	Desulfurobacterium crinifex	Bacteria; Pseudomonadati; Aquificota; Aquificia; Desulfurobacteriales; Desulfurobacteriaceae	N	53		N	60		Y	N	88		rTCA	YES	12743834
JCM 12127	Desulfurobacterium pacificum	Bacteria; Pseudomonadati; Aquificota; Aquificia; Desulfurobacteriales; Desulfurobacteriaceae	N	53		N	50		Y	N	88		rTCA	YES	17158986
JCM 11468	Thermovibrio ruber	Bacteria; Pseudomonadati; Aquificota; Aquificia; Desulfurobacteriales; Desulfurobacteriaceae	N	38		N	60		Y	N	88		rTCA	YES	12361298
JCM 14244	Venenivibrio stagnispumantis	Bacteria; Pseudomonadati; Aquificota; Aquificia; Hydrogenothermales; Hydrogenothermaceae	N	53		N	30		Y	N	90		rTCA	YES	18218938
JCM 15747	Thiofractor thiocamini	Bacteria; Pseudomonadati; Campylobacterota; Epsilonproteobacteria; Campylobacterales	N	69		N	30		Y	Y	100		r/roTCA	YES	22526267
JCM 19824	Sulfurovum aggregans	Bacteria; Pseudomonadati; Campylobacterota; Epsilonproteobacteria; Campylobacterales; Sulfurovaceae	N	69		N	30		Y	Y	100		r/roTCA	YES	24966202
JCM 11957	Caminibacter profundus	Bacteria; Pseudomonadati; Campylobacterota; Epsilonproteobacteria; Nautiliales; Nautiliaceae	N	69		N	30		Y	Y	100		r/roTCA	YES	14742457
JCM 15390	Nautilia abyssi	Bacteria; Pseudomonadati; Campylobacterota; Epsilonproteobacteria; Nautiliales; Nautiliaceae	N	69		N	30		Y	Y	100		r/roTCA	YES	19502307
JCM 15786	Nautilia lithotrophica	Bacteria; Pseudomonadati; Campylobacterota; Epsilonproteobacteria; Nautiliales; Nautiliaceae	N	69		N	30		Y	N	100		rTCA	YES	12148643
JCM 12457	Thioreductor micantisoli	Bacteria; Pseudomonadati; Campylobacterota; Epsilonproteobacteria; Nautiliales; Thioreductoraceae	N	69		N	30		Y	N	88		rTCA	YES	15774631
JCM 18382	Bradyrhizobium sp.	Bacteria; Pseudomonadati; Pseudomonadota; Alphaproteobacteria; Hyphomicrobiales; Nitrobacteraceae	Y	100		N	40		N	N	100		CBB	not tested	22635993
JCM 14636	Piezobacter thermophilus	Bacteria; Pseudomonadati; Pseudomonadota; Alphaproteobacteria; Rhodobacterales; Paracoccaceae	Y	100		N	50		N	N	100		CBB	YES	19689705
JCM 21060	Rhodocista centenaria	Bacteria; Pseudomonadati; Pseudomonadota; Alphaproteobacteria; Rhodospirillales; Azospirillaceae	Y	92		N	40		N	N	100		CBB	not tested	10.2323/jgam.38.541
JCM 17960	Magnetospira thiophila	Bacteria; Pseudomonadati; Pseudomonadota; Alphaproteobacteria; Rhodospirillales; Magnetospiraceae	Y	84		N	40		N	N	100		CBB	YES	22140150
JCM 12421	Thiobacter subterraneus	Bacteria; Pseudomonadati; Pseudomonadota; Betaproteobacteria; Burkholderiales	Y	92		N	40		N	N	90		CBB	YES	15653920
JCM 16107	Thiomonas islandica	Bacteria; Pseudomonadati; Pseudomonadota; Betaproteobacteria; Burkholderiales	Y	92		N	40		N	N	100		CBB	YES	20173005
JCM 10599	Paraburkholderia kururiensis	Bacteria; Pseudomonadati; Pseudomonadota; Betaproteobacteria; Burkholderiales; Burkholderiaceae	Y	92		N	40		N	N	100		CBB	not tested	10758884
JCM 15047	Thiobacillus thiophilus	Bacteria; Pseudomonadati; Pseudomonadota; Betaproteobacteria; Nitrosomonadales; Thiobacillaceae	Y	92		N	40		N	N	90		CBB	YES	19244446
JCM 17961	Endothiovibrio diazotrophicus	Bacteria; Pseudomonadati; Pseudomonadota; Gammaproteobacteria; Chromatiales; Thioalkalispiraceae	Y	84		N	50		N	N	100		CBB	YES	27983471
JCM 14586	Thioprofundum lithotrophicum	Bacteria; Pseudomonadati; Pseudomonadota; Gammaproteobacteria; Chromatiales; Thioprofundaceae	Y	92		N	40		N	N	90		CBB	YES	19689705
JCM 15514	Salinisphaera hydrothermalis	Bacteria; Pseudomonadati; Pseudomonadota; Gammaproteobacteria; Salinisphaerales; Salinisphaeraceae	N	69		N	40		N	N	100		unknown	YES	19502342
JCM 17795	Galenea microaerophila	Bacteria; Pseudomonadati; Pseudomonadota; Gammaproteobacteria; Thiotrichales; Piscirickettsiaceae	Y	92		N	40		N	N	90		CBB	YES	22307509
JCM 12397	Hydrogenovibrio thermophilus	Bacteria; Pseudomonadati; Pseudomonadota; Gammaproteobacteria; Thiotrichales; Piscirickettsiaceae	Y	92		N	40		N	N	90		CBB	YES	15545479
JCM 30760	Thiomicrorhabdus hydrogeniphila	Bacteria; Pseudomonadati; Pseudomonadota; Gammaproteobacteria; Thiotrichales; Piscirickettsiaceae	Y	92		N	50		N	N	90		CBB	YES	27334912
JCM 10831	Hydrogenophilus hirschii	Bacteria; Pseudomonadati; Pseudomonadota; Hydrogenophilia; Hydrogenophilales; Hydrogenophilaceae	Y	92		N	30		N	N	100		CBB	YES	11321094
JCM 16106	Hydrogenophilus islandicus	Bacteria; Pseudomonadati; Pseudomonadota; Hydrogenophilia; Hydrogenophilales; Hydrogenophilaceae	Y	92		N	30		N	N	90		CBB	YES	20228213
JCM 30394	Deferrisoma palaeochoriense	Bacteria; Pseudomonadati; Thermodesulfobacteriota; Deferrisomatia; Deferrisomatales; Deferrisomataceae	N	53		Y	80		N	Y	100		WL/roTCA	YES	26610851
JCM 19179	Desulfatiglans parachlorophenolica	Bacteria; Pseudomonadati; Thermodesulfobacteriota; Desulfobacteria; Desulfatiglandales; Desulfatiglandaceae	N	46		Y	90		N	N	90		WL	NO	24944334
JCM 14469	Desulfatiferula olefinivorans	Bacteria; Pseudomonadati; Thermodesulfobacteriota; Desulfobacteria; Desulfobacterales; Desulfobacteraceae	N	61		Y	80		N	N	88		WL	NO	17978243
JCM 12294	Desulfocicer niacini	Bacteria; Pseudomonadati; Thermodesulfobacteriota; Desulfobacteria; Desulfobacterales; Desulfobacteraceae	N	61		Y	80		N	N	77		WL	YES	10.1007/BF00409843
JCM 16085	Desulfoconvexum algidum	Bacteria; Pseudomonadati; Thermodesulfobacteriota; Desulfobacteria; Desulfobacterales; Desulfobacteraceae	N	61		Y	80		N	N	90		WL	YES	22659505
JCM 12296	Desulfosarcina cetonica	Bacteria; Pseudomonadati; Thermodesulfobacteriota; Desulfobacteria; Desulfobacterales; Desulfosarcinaceae	N	61		Y	80		N	Y	100		WL/roTCA	not tested	7778975
JCM 39068	Desulfocastanea catecholica	Bacteria; Pseudomonadati; Thermodesulfobacteriota; Desulfobulbia; Desulfobulbales; Desulfobulbaceae	N	53		Y	90		N	N	100		WL	YES	10.1007/BF00415278
JCM 31598	Desulfonatronum parangueonense	Bacteria; Pseudomonadati; Thermodesulfobacteriota; Desulfovibrionia; Desulfovibrionales; Desulfonatronaceae	N	76		N	40		N	N	77		unknown	YES	29039304
JCM 13028	Desulfonauticus autotrophicus	Bacteria; Pseudomonadati; Thermodesulfobacteriota; Desulfovibrionia; Desulfovibrionales; Desulfonauticaceae	N	61		N	30		N	N	88		unknown	YES	19050820
JCM 12298	Desulfothermus naphthae	Bacteria; Pseudomonadati; Thermodesulfobacteriota; Desulfovibrionia; Desulfovibrionales; Desulfothermaceae	N	53		Y	90		N	N	80		WL	NO	10.1002/9781118960608.gbm01031.pub2
JCM 13304	Desulfothermus okinawensis	Bacteria; Pseudomonadati; Thermodesulfobacteriota; Desulfovibrionia; Desulfovibrionales; Desulfothermaceae	N	53		Y	90		N	Y	100		WL/roTCA	NO	17911311
JCM 30146	Desulfovibrio biadhensis	Bacteria; Pseudomonadati; Thermodesulfobacteriota; Desulfovibrionia; Desulfovibrionales; Desulfovibrionaceae	N	76		Y	50		N	Y	100		WL/roTCA	NO	25634952
JCM 31065	Maridesulfovibrio salinus	Bacteria; Pseudomonadati; Thermodesulfobacteriota; Desulfovibrionia; Desulfovibrionales; Desulfovibrionaceae	N	76		N	40		N	Y	100		roTCA	NO	29458461
JCM 30471	Desulfuromonas carbonis	Bacteria; Pseudomonadati; Thermodesulfobacteriota; Desulfuromonadia; Desulfuromonadales; Desulfuromonadaceae	N	76		N	60		N	Y	100		roTCA	NO	25736408
JCM 15764	Geotalea toluenoxydans	Bacteria; Pseudomonadati; Thermodesulfobacteriota; Desulfuromonadia; Geobacterales; Geobacteraceae	N	53		N	70		N	Y	100		roTCA	NO	19656942
JCM 16410	Desulfosoma profundi	Bacteria; Pseudomonadati; Thermodesulfobacteriota; Syntrophobacteria; Syntrophobacterales; Syntrophobacteraceae	N	76		Y	90		N	Y	100		WL/roTCA	NO	22120904
JCM 12314	Thermus kawarayensis	Bacteria; Thermotogati; Deinococcota; Deinococci; Thermales; Thermaceae	Y	92		N	50		N	N	100		CBB	not tested	15378402
