# Supplementary material
Source: HighWire-hosted journal article supplement (doi:10.1101/gr.281026.125)
Supplement: Supplemental_Table_S7.xlsx [file Supplemental_Table_S7.xlsx]

## Sheet: TableS7
Supplemental Table S7. Biosynthetic gene clusters (BGCs) detected in 281 genomes.
JCM number	Scientific name	Taxonomy (ICNP-based)	Genome size (bp)	Total BGCs		BGC category
						NRPS	PKS	RiPP	saccharide	terpene	others
JCM 15760	Haloarcula argentinensis	Archaea; Methanobacteriati; Halobacteriota; Halobacteria; Halobacteriales; Haloarculaceae	4040500	6				3		2	1
JCM 17269	Halovenus rubra	Archaea; Methanobacteriati; Halobacteriota; Halobacteria; Halobacteriales; Haloarculaceae	3605887	3				1		2
JCM 19908	Halobacterium rubrum	Archaea; Methanobacteriati; Halobacteriota; Halobacteria; Halobacteriales; Halobacteriaceae	3058946	4				1		3
JCM 11890	Halalkalicoccus tibetensis	Archaea; Methanobacteriati; Halobacteriota; Halobacteria; Halobacteriales; Halococcaceae	3585449	4				1		2	1
JCM 30029	Halobium salinum	Archaea; Methanobacteriati; Halobacteriota; Halobacteria; Halobacteriales; Haloferacaceae	4440065	4				1		3
JCM 18549	Halolamina salina	Archaea; Methanobacteriati; Halobacteriota; Halobacteria; Halobacteriales; Haloferacaceae	2830580	3				1		2
JCM 30442	Haloparvum alkalitolerans	Archaea; Methanobacteriati; Halobacteriota; Halobacteria; Halobacteriales; Haloferacaceae	3143340	4				1		2	1
JCM 17506	Halopelagius fulvigenes	Archaea; Methanobacteriati; Halobacteriota; Halobacteria; Halobacteriales; Haloferacaceae	3938079	4				1		2	1
JCM 18641	Halopenitus salinus	Archaea; Methanobacteriati; Halobacteriota; Halobacteria; Halobacteriales; Haloferacaceae	3007801	3				1		2
JCM 14265	Halorubrum ejinorense	Archaea; Methanobacteriati; Halobacteriota; Halobacteria; Halobacteriales; Haloferacaceae	3412359	5				3		2
JCM 17823	Halorubrum gandharaense	Archaea; Methanobacteriati; Halobacteriota; Halobacteria; Halobacteriales; Haloferacaceae	3156684	4				1		3
JCM 18237	Halorubrum luteum	Archaea; Methanobacteriati; Halobacteriota; Halobacteria; Halobacteriales; Haloferacaceae	3239089	3				1		2
JCM 30955	Halorubrum pallidum	Archaea; Methanobacteriati; Halobacteriota; Halobacteria; Halobacteriales; Haloferacaceae	2882457	3				1		2
JCM 11889	Halorubrum tibetense	Archaea; Methanobacteriati; Halobacteriota; Halobacteria; Halobacteriales; Haloferacaceae	3180477	4				2		2
JCM 31271	Halorubrum trueperi	Archaea; Methanobacteriati; Halobacteriota; Halobacteria; Halobacteriales; Haloferacaceae	3769829	3				1		2
JCM 30665	Halorubrum yunnanense	Archaea; Methanobacteriati; Halobacteriota; Halobacteria; Halobacteriales; Haloferacaceae	3137943	3				1		2
JCM 18642	Haloarchaeobius amylolyticus	Archaea; Methanobacteriati; Halobacteriota; Halobacteria; Halobacteriales; Halorubellaceae	4580333	3				1		2
JCM 17117	Halorubellus litoreus	Archaea; Methanobacteriati; Halobacteriota; Halobacteria; Halobacteriales; Halorubellaceae	4597159	9				6		3
JCM 19583	Halopiger thermotolerans	Archaea; Methanobacteriati; Halobacteriota; Halobacteria; Halobacteriales; Natrialbaceae	4150957	7				3		2	2
JCM 16592	Halostagnicola alkaliphila	Archaea; Methanobacteriati; Halobacteriota; Halobacteria; Halobacteriales; Natrialbaceae	4895172	4				2		2
JCM 18750	Halostagnicola bangensis	Archaea; Methanobacteriati; Halobacteriota; Halobacteria; Halobacteriales; Natrialbaceae	4521998	4				1		2	1
JCM 31939	Natronobiforma cellulositropha	Archaea; Methanobacteriati; Halobacteriota; Halobacteria; Halobacteriales; Natrialbaceae	3826460	7				5		2
JCM 16328	Natronoarchaeum mannanilyticum	Archaea; Methanobacteriati; Halobacteriota; Halobacteria; Halobacteriales; Natronoarchaeaceae	3578268	3				1		2
JCM 19597	Salinarchaeum chitinilyticum	Archaea; Methanobacteriati; Halobacteriota; Halobacteria; Halobacteriales; Natronoarchaeaceae	3176664	3				1		2
JCM 15416	Methanobacterium flexile	Archaea; Methanobacteriati; Methanobacteriota; Methanobacteria; Methanobacteriales; Methanobacteriaceae	2264390	6		2		3		1
JCM 15797	Methanobacterium kanagiense	Archaea; Methanobacteriati; Methanobacteriota; Methanobacteria; Methanobacteriales; Methanobacteriaceae	2131673	7		2		4			1
JCM 15415	Methanobacterium movens	Archaea; Methanobacteriati; Methanobacteriota; Methanobacteria; Methanobacteriales; Methanobacteriaceae	2224811	8		2		4		1	1
JCM 18470	Methanobacterium movilense	Archaea; Methanobacteriati; Methanobacteriota; Methanobacteria; Methanobacteriales; Methanobacteriaceae	3209112	7		2		4			1
JCM 10723	Methanothermus sociabilis	Archaea; Methanobacteriati; Methanobacteriota; Methanobacteria; Methanobacteriales; Methanothermaceae	1265941	1				1
JCM 17393	Methanothermobacter crinale	Archaea; Methanobacteriati; Methanobacteriota; Methanobacteria; Methanobacteriales; Methanothermobacteraceae	1566431	3				3
JCM 11886	Methanocaldococcus indicus	Archaea; Methanobacteriati; Methanobacteriota; Methanococci; Methanococcales; Methanocaldococcaceae	1414442	1				1
JCM 10627	Methanocalculus pumilus	Archaea; Methanobacteriati; Methanobacteriota; Methanomicrobia; Methanomicrobiales; Methanocalculaceae	2143944	2				2
JCM 11281	Methanosarcina baltica	Archaea; Methanobacteriati; Methanobacteriota; Methanomicrobia; Methanosarcinales; Methanosarcinaceae	3739569	2				2
JCM 15540	Methanosarcina subterranea	Archaea; Methanobacteriati; Methanobacteriota; Methanomicrobia; Methanosarcinales; Methanosarcinaceae	5061919	5				4			1
JCM 13384	Palaeococcus helgesonii	Archaea; Methanobacteriati; Methanobacteriota; Thermococci; Thermococcales; Thermococcaceae	1954540	1				1
JCM 8421	Pyrococcus woesei	Archaea; Methanobacteriati; Methanobacteriota; Thermococci; Thermococcales; Thermococcaceae	1856505	3				3
JCM 10828	Thermococcus aegaeus	Archaea; Methanobacteriati; Methanobacteriota; Thermococci; Thermococcales; Thermococcaceae	1913926	2				2
JCM 16138	Thermococcus atlanticus	Archaea; Methanobacteriati; Methanobacteriota; Thermococci; Thermococcales; Thermococcaceae	2304791	1				1
JCM 12540	Thermococcus coalescens	Archaea; Methanobacteriati; Methanobacteriota; Thermococci; Thermococcales; Thermococcaceae	2134446	2				2
JCM 11825	Thermococcus marinus	Archaea; Methanobacteriati; Methanobacteriota; Thermococci; Thermococcales; Thermococcaceae	2082156	1				1
JCM 16307	Thermococcus prieurii	Archaea; Methanobacteriati; Methanobacteriota; Thermococci; Thermococcales; Thermococcaceae	2138418	1				1
JCM 11816	Thermococcus sp.	Archaea; Methanobacteriati; Methanobacteriota; Thermococci; Thermococcales; Thermococcaceae	2096235	1				1
JCM 10985	Thermococcus waiotapuensis	Archaea; Methanobacteriati; Methanobacteriota; Thermococci; Thermococcales; Thermococcaceae	1806822	1				1
JCM 13583	Thermogymnomonas acidicola	Archaea; Methanobacteriati; Thermoplasmatota; Thermoplasmata; Thermoplasmatales	1729104	2				1		1
JCM 11320	Acidilobus aceticus	Archaea; Thermoproteati; Thermoproteota; Thermoprotei; Acidilobales; Acidilobaceae	1494469	1				1
JCM 13516	Caldococcus noboribetus	Archaea; Thermoproteati; Thermoproteota; Thermoprotei; Desulfurococcales	1517127	1				1
JCM 10309	Sulfophobococcus zilligii	Archaea; Thermoproteati; Thermoproteota; Thermoprotei; Desulfurococcales; Desulfurococcaceae	1402993	1				1
JCM 9392	Pyrodictium brockii	Archaea; Thermoproteati; Thermoproteota; Thermoprotei; Desulfurococcales; Pyrodictiaceae	1639937	2							2
JCM 10088	Thermocladium modestius	Archaea; Thermoproteati; Thermoproteota; Thermoprotei; Thermoproteales; Thermocladiaceae	1903084	1				1
JCM 9190	Pyrobaculum organotrophum	Archaea; Thermoproteati; Thermoproteota; Thermoprotei; Thermoproteales; Thermoproteaceae	1890320	1				1
JCM 17229	Thermoproteus thermophilus	Archaea; Thermoproteati; Thermoproteota; Thermoprotei; Thermoproteales; Thermoproteaceae	1755389	1				1
JCM 14467	Vulcanisaeta sp.	Archaea; Thermoproteati; Thermoproteota; Thermoprotei; Thermoproteales; Thermoproteaceae	2448134	1				1
JCM 16159	Vulcanisaeta sp.	Archaea; Thermoproteati; Thermoproteota; Thermoprotei; Thermoproteales; Thermoproteaceae	2256912	1				1
JCM 16161	Vulcanisaeta sp.	Archaea; Thermoproteati; Thermoproteota; Thermoprotei; Thermoproteales; Thermoproteaceae	2304525	1				1
JCM 1272	Bifidobacterium longum subsp. infantis	Bacteria; Bacillati; Actinomycetota; Actinomycetes; Bifidobacteriales; Bifidobacteriaceae	2674325	5				5
JCM 9957	Kineosporia succinea	Bacteria; Bacillati; Actinomycetota; Actinomycetes; Kineosporiales; Kineosporiaceae	8101097	23		7	3	6		3	4
JCM 13580	Streptomyces drozdowiczii	Bacteria; Bacillati; Actinomycetota; Actinomycetes; Kitasatosporales; Streptomycetaceae	7361020	33		13	6	2		5	7
JCM 12681	Streptomyces mexicanus	Bacteria; Bacillati; Actinomycetota; Actinomycetes; Kitasatosporales; Streptomycetaceae	8193564	30		4	6	7		6	7
JCM 4814	Streptomyces phaeofaciens	Bacteria; Bacillati; Actinomycetota; Actinomycetes; Kitasatosporales; Streptomycetaceae	10631713	50		8	12	10		6	14
JCM 4914	Streptomyces platensis subsp. malvinus	Bacteria; Bacillati; Actinomycetota; Actinomycetes; Kitasatosporales; Streptomycetaceae	8553799	38		10	6	8		4	10
JCM 18897	Streptomyces sp.	Bacteria; Bacillati; Actinomycetota; Actinomycetes; Kitasatosporales; Streptomycetaceae	7035241	37		13	6	10		5	3
JCM 16927	Cellulomonas chitinilytica	Bacteria; Bacillati; Actinomycetota; Actinomycetes; Micrococcales; Cellulomonadaceae	4915601	7		2	1	1		1	2
JCM 18110	Cellulomonas iranensis	Bacteria; Bacillati; Actinomycetota; Actinomycetes; Micrococcales; Cellulomonadaceae	3981479	6			1	1		1	3
JCM 18755	Cellulomonas pakistanensis	Bacteria; Bacillati; Actinomycetota; Actinomycetes; Micrococcales; Cellulomonadaceae	4028508	4		1	2			1
JCM 18111	Cellulomonas persica	Bacteria; Bacillati; Actinomycetota; Actinomycetes; Micrococcales; Cellulomonadaceae	3677812	4			1	1		1	1
JCM 9808	Cellulomonas sp.	Bacteria; Bacillati; Actinomycetota; Actinomycetes; Micrococcales; Cellulomonadaceae	4306458	5		1	1	1		1	1
JCM 15471	Brachybacterium zhongshanense	Bacteria; Bacillati; Actinomycetota; Actinomycetes; Micrococcales; Dermabacteraceae	3667387	5				3			2
JCM 13591	Microbacterium xylanilyticum	Bacteria; Bacillati; Actinomycetota; Actinomycetes; Micrococcales; Microbacteriaceae	4147444	5		1	1			2	1
JCM 14115	Paenarthrobacter nitroguajacolicus	Bacteria; Bacillati; Actinomycetota; Actinomycetes; Micrococcales; Micrococcaceae	5133410	11		3	2	2		1	3
JCM 9534	Catenuloplanes indicus	Bacteria; Bacillati; Actinomycetota; Actinomycetes; Micromonosporales; Micromonosporaceae	9235614	29		9	6	7		4	3
JCM 9533	Catenuloplanes niger	Bacteria; Bacillati; Actinomycetota; Actinomycetes; Micromonosporales; Micromonosporaceae	9771129	29		7	7	5	2	4	4
JCM 7447	Corynebacterium amycolatum	Bacteria; Bacillati; Actinomycetota; Actinomycetes; Mycobacteriales; Corynebacteriaceae	2475163	4		2	1			1
JCM 15430	Mycobacterium avium	Bacteria; Bacillati; Actinomycetota; Actinomycetes; Mycobacteriales; Mycobacteriaceae	5607771	19		8	8	2		1
JCM 16369	Mycolicibacterium crocinum	Bacteria; Bacillati; Actinomycetota; Actinomycetes; Mycobacteriales; Mycobacteriaceae	6066626	18		4	8	2		2	2
JCM 12141	Mycolicibacterium hodleri	Bacteria; Bacillati; Actinomycetota; Actinomycetes; Mycobacteriales; Mycobacteriaceae	6559169	21		8	8	2		2	1
JCM 16370	Mycolicibacterium pallens	Bacteria; Bacillati; Actinomycetota; Actinomycetes; Mycobacteriales; Mycobacteriaceae	6093662	16		4	7	2		2	1
JCM 15927	Mycolicibacterium pyrenivorans	Bacteria; Bacillati; Actinomycetota; Actinomycetes; Mycobacteriales; Mycobacteriaceae	6903827	20		6	6	2		3	3
JCM 9803	Rhodococcus erythropolis	Bacteria; Bacillati; Actinomycetota; Actinomycetes; Mycobacteriales; Nocardiaceae	6940150	23		11	2	5		2	3
JCM 9804	Rhodococcus erythropolis	Bacteria; Bacillati; Actinomycetota; Actinomycetes; Mycobacteriales; Nocardiaceae	6619609	22		11	2	5		2	2
JCM 9805	Rhodococcus erythropolis	Bacteria; Bacillati; Actinomycetota; Actinomycetes; Mycobacteriales; Nocardiaceae	7048435	22		11	2	5		2	2
JCM 9791	Rhodococcus sp.	Bacteria; Bacillati; Actinomycetota; Actinomycetes; Mycobacteriales; Nocardiaceae	6570452	19		9	2	2		2	4
JCM 9793	Rhodococcus sp.	Bacteria; Bacillati; Actinomycetota; Actinomycetes; Mycobacteriales; Nocardiaceae	6540887	19		9	2	2		2	4
JCM 10703	Nocardioides nitrophenolicus	Bacteria; Bacillati; Actinomycetota; Actinomycetes; Propionibacteriales; Nocardioidaceae	5815021	10		2		4			4
JCM 16518	Nocardioides sp.	Bacteria; Bacillati; Actinomycetota; Actinomycetes; Propionibacteriales; Nocardioidaceae	4998320	3		1	1				1
JCM 18998	Nocardioides sp.	Bacteria; Bacillati; Actinomycetota; Actinomycetes; Propionibacteriales; Nocardioidaceae	4343925	5		3		1			1
JCM 18999	Nocardioides sp.	Bacteria; Bacillati; Actinomycetota; Actinomycetes; Propionibacteriales; Nocardioidaceae	3883913	3		1					2
JCM 18916	Cutibacterium acnes subsp. acnes	Bacteria; Bacillati; Actinomycetota; Actinomycetes; Propionibacteriales; Propionibacteriaceae	2569180	3		2		1
JCM 18997	Conexibacter sp.	Bacteria; Bacillati; Actinomycetota; Thermoleophilia; Solirubrobacterales; Conexibacteraceae	5263738	6		1		5
JCM 14450	Geobacillus stearothermophilus	Bacteria; Bacillati; Bacillota; Bacilli; Bacillales; Anoxybacillaceae	2971762	1				1
JCM 20266	Bacillus cereus	Bacteria; Bacillati; Bacillota; Bacilli; Bacillales; Bacillaceae	6107042	15		7		5		1	2
JCM 10596	Caldalkalibacillus mannanilyticus	Bacteria; Bacillati; Bacillota; Bacilli; Bacillales; Bacillaceae	4618642	18		2	2	9		1	4
JCM 21714	Gracilibacillus boraciitolerans	Bacteria; Bacillati; Bacillota; Bacilli; Bacillales; Bacillaceae	3738522	6				4		1	1
JCM 18860	Gracilibacillus pakistanensis	Bacteria; Bacillati; Bacillota; Bacilli; Bacillales; Bacillaceae	4328502	4			3				1
JCM 18966	Gracilibacillus sp.	Bacteria; Bacillati; Bacillota; Bacilli; Bacillales; Bacillaceae	4228030	4			3				1
JCM 9157	Halalkalibacter akibai	Bacteria; Bacillati; Bacillota; Bacilli; Bacillales; Bacillaceae	4933995	5			1	1		1	2
JCM 9140	Halalkalibacter wakoensis	Bacteria; Bacillati; Bacillota; Bacilli; Bacillales; Bacillaceae	4723160	4			1			1	2
JCM 12149	Lentibacillus halophilus	Bacteria; Bacillati; Bacillota; Bacilli; Bacillales; Bacillaceae	2976565	5			2			1	2
JCM 30234	Lentibacillus kimchii	Bacteria; Bacillati; Bacillota; Bacilli; Bacillales; Bacillaceae	2809322	6		1	2			2	1
JCM 18776	Lysinibacillus pakistanensis	Bacteria; Bacillati; Bacillota; Bacilli; Bacillales; Bacillaceae	5094512	7		2	1	2		1	1
JCM 12389	Salinibacillus aidingensis	Bacteria; Bacillati; Bacillota; Bacilli; Bacillales; Bacillaceae	3522017	3			1	1			1
JCM 30907	Virgibacillus ainsalahensis	Bacteria; Bacillati; Bacillota; Bacilli; Bacillales; Bacillaceae	3861668	4			2			1	1
JCM 32284	Virgibacillus kimchii	Bacteria; Bacillati; Bacillota; Bacilli; Bacillales; Bacillaceae	4223230	6			2	2		1	1
JCM 15395	Virgibacillus siamensis	Bacteria; Bacillati; Bacillota; Bacilli; Bacillales; Bacillaceae	3677844	5			1	1		2	1
JCM 9795	Paenibacillus sp.	Bacteria; Bacillati; Bacillota; Bacilli; Bacillales; Paenibacillaceae	5653810	9			1	3		2	3
JCM 9796	Paenibacillus sp.	Bacteria; Bacillati; Bacillota; Bacilli; Bacillales; Paenibacillaceae	5658185	9			1	3		2	3
JCM 10914	Paenibacillus sp.	Bacteria; Bacillati; Bacillota; Bacilli; Bacillales; Paenibacillaceae	6299834	8		2	2	1		2	1
JCM 18996	Paenibacillus sp.	Bacteria; Bacillati; Bacillota; Bacilli; Bacillales; Paenibacillaceae	3917731	3			1	2
JCM 7540	Paenibacillus thiaminolyticus	Bacteria; Bacillati; Bacillota; Bacilli; Bacillales; Paenibacillaceae	6594347	24		10	3	9		1	1
JCM 2151	Staphylococcus aureus	Bacteria; Bacillati; Bacillota; Bacilli; Bacillales; Staphylococcaceae	2720318	7		1	1	1		1	3
JCM 8702	Staphylococcus aureus	Bacteria; Bacillati; Bacillota; Bacilli; Bacillales; Staphylococcaceae	2914467	7		1	1	1		1	3
JCM 14719	Calditerricola satsumensis	Bacteria; Bacillati; Bacillota; Bacilli; Calditerricolales; Calditerricolaceae	2467035	2				2
JCM 14720	Calditerricola yamamurae	Bacteria; Bacillati; Bacillota; Bacilli; Calditerricolales; Calditerricolaceae	2489749	4			1	3
JCM 17300	Ligilactobacillus faecis	Bacteria; Bacillati; Bacillota; Bacilli; Lactobacillales; Lactobacillaceae	2057552	2		1	1
JCM 18671	Secundilactobacillus oryzae	Bacteria; Bacillati; Bacillota; Bacilli; Lactobacillales; Lactobacillaceae	1948177	2			1			1
JCM 31116	Streptococcus alactolyticus	Bacteria; Bacillati; Bacillota; Bacilli; Lactobacillales; Streptococcaceae	1758390	1			1
JCM 12261	Streptococcus gallolyticus subsp. pasteurianus	Bacteria; Bacillati; Bacillota; Bacilli; Lactobacillales; Streptococcaceae	2177854	1			1
JCM 16981	Salinicoccus jeotgali	Bacteria; Bacillati; Bacillota; Bacilli; Staphylococcales; Salinicoccaceae	2415800	1						1
JCM 19029	Salinicoccus sesuvii	Bacteria; Bacillati; Bacillota; Bacilli; Staphylococcales; Salinicoccaceae	2564959	1						1
JCM 12822	Salinicoccus siamensis	Bacteria; Bacillati; Bacillota; Bacilli; Staphylococcales; Salinicoccaceae	2187116	1						1
JCM 19376	Fusibacter bizertensis	Bacteria; Bacillati; Bacillota; Clostridia; Eubacteriales	4581805	4				4
JCM 19912	Fusibacter fontis	Bacteria; Bacillati; Bacillota; Clostridia; Eubacteriales	3341470	4				3			1
JCM 1385	Clostridium baratii	Bacteria; Bacillati; Bacillota; Clostridia; Eubacteriales; Clostridiaceae	3067813	3				3
JCM 9989	Clostridium budayi	Bacteria; Bacillati; Bacillota; Clostridia; Eubacteriales; Clostridiaceae	3022431	3				3
JCM 1393	Clostridium carnis	Bacteria; Bacillati; Bacillota; Clostridia; Eubacteriales; Clostridiaceae	3137067	4				3			1
JCM 14030	Clostridium nitrophenolicum	Bacteria; Bacillati; Bacillota; Clostridia; Eubacteriales; Clostridiaceae	5767678	11				11
JCM 10519	Clostridium sp.	Bacteria; Bacillati; Bacillota; Clostridia; Eubacteriales; Clostridiaceae	4775276	7				5			2
JCM 21531	Acetivibrio straminisolvens	Bacteria; Bacillati; Bacillota; Clostridia; Eubacteriales; Oscillospiraceae	4111093	18		6	7	5
JCM 17209	Desulfovectis peckii	Bacteria; Bacillati; Bacillota; Clostridia; Eubacteriales; Peptococcaceae	2384325	2				2
JCM 15048	Symbiobacterium ostreiconchae	Bacteria; Bacillati; Bacillota; Clostridia; Eubacteriales; Symbiobacteriaceae	3636849	5				2			3
JCM 15996	Symbiobacterium turbinis	Bacteria; Bacillati; Bacillota; Clostridia; Eubacteriales; Symbiobacteriaceae	3796082	6				3			3
JCM 18213	Halanaerobium sehlinense	Bacteria; Bacillati; Bacillota; Clostridia; Halanaerobiales; Halanaerobiaceae	2905686	2				1		1
JCM 16358	Halanaerocella petrolearia	Bacteria; Bacillati; Bacillota; Clostridia; Halanaerobiales; Halobacteroidaceae	2759461	2				1			1
JCM 16312	Defluviitalea saccharophila	Bacteria; Bacillati; Bacillota; Clostridia; Lachnospirales; Defluviitaleaceae	3014578	7				7
JCM 17205	Blautia faecis	Bacteria; Bacillati; Bacillota; Clostridia; Lachnospirales; Lachnospiraceae	4633985	6		2		4
JCM 17039	Blautia glucerasea	Bacteria; Bacillati; Bacillota; Clostridia; Lachnospirales; Lachnospiraceae	2999599	3				3
JCM 17204	Blautia stercoris	Bacteria; Bacillati; Bacillota; Clostridia; Lachnospirales; Lachnospiraceae	3685758	8				8
JCM 15917	Mediterraneibacter faecis	Bacteria; Bacillati; Bacillota; Clostridia; Lachnospirales; Lachnospiraceae	3294639	3		1		2
JCM 13368	Mediterraneibacter glycyrrhizinilyticus	Bacteria; Bacillati; Bacillota; Clostridia; Lachnospirales; Lachnospiraceae	3287311	1				1
JCM 17581	Roseburia faecis	Bacteria; Bacillati; Bacillota; Clostridia; Lachnospirales; Lachnospiraceae	3385412	9				9
JCM 11672	Alkaliphilus crotonatoxidans	Bacteria; Bacillati; Bacillota; Clostridia; Peptostreptococcales; Natronincolaceae	3914444	5				4			1
JCM 13990	Tindallia texcoconensis	Bacteria; Bacillati; Bacillota; Clostridia; Peptostreptococcales; Tindalliaceae	3005878	2				2
JCM 16816	Thermoanaerobacter brockii subsp. lactiethylicus	Bacteria; Bacillati; Bacillota; Clostridia; Thermoanaerobacterales; Thermoanaerobacteraceae	2412053	3				3
JCM 18270	Thermoanaerobacterium calidifontis	Bacteria; Bacillati; Bacillota; Clostridia; Thermoanaerobacterales; Thermoanaerobacteraceae	2686457	2				2
JCM 15765	Desulfitobacterium aromaticivorans	Bacteria; Bacillati; Bacillota; Desulfitobacteriia; Desulfitobacteriales; Desulfitobacteriaceae	4542991	7		1		5			1
JCM 31105	Desulfosporosinus nitroreducens	Bacteria; Bacillati; Bacillota; Desulfitobacteriia; Desulfitobacteriales; Desulfitobacteriaceae	5627572	5		2	1	2
JCM 14036	Desulfotomaculum defluvii	Bacteria; Bacillati; Bacillota; Desulfotomaculia; Desulfotomaculales; Desulfotomaculaceae	3699189	5				5
JCM 10604	Coprobacillus cateniformis	Bacteria; Bacillati; Bacillota; Erysipelotrichia; Erysipelotrichales; Coprobacillaceae	3669259	6				6
JCM 30191	Breznakia pachnodae	Bacteria; Bacillati; Bacillota; Erysipelotrichia; Erysipelotrichales; Erysipelotrichaceae	4319598	3				3
JCM 32836	Desulfosporomusa polytropa	Bacteria; Bacillati; Bacillota; Negativicutes; Selenomonadales; Sporomusaceae	5898239	8		2	2	3			1
JCM 13218	Sporomusa intestinalis	Bacteria; Bacillati; Bacillota; Negativicutes; Selenomonadales; Sporomusaceae	5535802	7		2	1	2			2
JCM 31403	Megasphaera hexanoica	Bacteria; Bacillati; Bacillota; Negativicutes; Veillonellales; Veillonellaceae	2882543	1				1
JCM 13344	Syntrophomonas erecta subsp. sporosyntropha	Bacteria; Bacillati; Bacillota; Syntrophomonadia; Syntrophomonadales; Syntrophomonadaceae	2735001	1				1
JCM 17260	Thermosyntropha tengcongensis	Bacteria; Bacillati; Bacillota; Syntrophomonadia; Syntrophomonadales; Syntrophomonadaceae	2325046	1				1
JCM 17239	Anaerosalibacter bizertensis	Bacteria; Bacillati; Bacillota; Tissierellia; Tissierellales; Sporanaerobacteraceae	2622249	7				7
JCM 30480	Brassicibacter thermophilus	Bacteria; Bacillati; Bacillota; Tissierellia; Tissierellales; Thermohalobacteraceae	2753922	2				2
JCM 16120	Caldilinea tarbellica	Bacteria; Bacillati; Chloroflexota; Caldilineae; Caldilineales; Caldilineaceae	5254420	3			1			2
JCM 13302	Hydrogenivirga okinawensis	Bacteria; Pseudomonadati; Aquificota; Aquificia; Aquificales; Aquificaceae	1829618	3		1		2
JCM 10560	Hydrogenobacter subterraneus	Bacteria; Pseudomonadati; Aquificota; Aquificia; Aquificales; Aquificaceae	1675895	2		1		1
JCM 12825	Desulfurobacterium crinifex	Bacteria; Pseudomonadati; Aquificota; Aquificia; Desulfurobacteriales; Desulfurobacteriaceae	2071328	2				2
JCM 12127	Desulfurobacterium pacificum	Bacteria; Pseudomonadati; Aquificota; Aquificia; Desulfurobacteriales; Desulfurobacteriaceae	1602177	1				1
JCM 11468	Thermovibrio ruber	Bacteria; Pseudomonadati; Aquificota; Aquificia; Desulfurobacteriales; Desulfurobacteriaceae	1504690	1				1
JCM 14244	Venenivibrio stagnispumantis	Bacteria; Pseudomonadati; Aquificota; Aquificia; Hydrogenothermales; Hydrogenothermaceae	1627971	1				1
JCM 10556	Bacteroides acidifaciens	Bacteria; Pseudomonadati; Bacteroidota; Bacteroidia; Bacteroidales; Bacteroidaceae	5179879	4			1	3
JCM 12987	Bacteroides nordii	Bacteria; Pseudomonadati; Bacteroidota; Bacteroidia; Bacteroidales; Bacteroidaceae	5689128	1				1
JCM 6292	Bacteroides pyogenes	Bacteria; Pseudomonadati; Bacteroidota; Bacteroidia; Bacteroidales; Bacteroidaceae	3529281	1				1
JCM 6294	Bacteroides pyogenes	Bacteria; Pseudomonadati; Bacteroidota; Bacteroidia; Bacteroidales; Bacteroidaceae	3529232	1				1
JCM 10003	Bacteroides pyogenes	Bacteria; Pseudomonadati; Bacteroidota; Bacteroidia; Bacteroidales; Bacteroidaceae	3470196	2		1		1
JCM 10512	Bacteroides reticulotermitis	Bacteria; Pseudomonadati; Bacteroidota; Bacteroidia; Bacteroidales; Bacteroidaceae	5470359	1				1
JCM 16496	Bacteroides rodentium	Bacteria; Pseudomonadati; Bacteroidota; Bacteroidia; Bacteroidales; Bacteroidaceae	5081263	3				3
JCM 15092	Phocaeicola paurosaccharolyticus	Bacteria; Pseudomonadati; Bacteroidota; Bacteroidia; Bacteroidales; Bacteroidaceae	3518471	1							1
JCM 17136	Phocaeicola sartorii	Bacteria; Pseudomonadati; Bacteroidota; Bacteroidia; Bacteroidales; Bacteroidaceae	5462188	2			1	1
JCM 30204	Dysgonomonas termitidis	Bacteria; Pseudomonadati; Bacteroidota; Bacteroidia; Bacteroidales; Dysgonomonadaceae	6898220	4			1	3
JCM 12565	Petrimonas sulfuriphila	Bacteria; Pseudomonadati; Bacteroidota; Bacteroidia; Bacteroidales; Dysgonomonadaceae	3902297	2				1		1
JCM 15907	Porphyromonas gingivicanis	Bacteria; Pseudomonadati; Bacteroidota; Bacteroidia; Bacteroidales; Porphyromonadaceae	2085170	1						1
JCM 17484	Hoylesella saccharolytica	Bacteria; Pseudomonadati; Bacteroidota; Bacteroidia; Bacteroidales; Prevotellaceae	3034309	3			1	1			1
JCM 15640	Hoylesella timonensis	Bacteria; Pseudomonadati; Bacteroidota; Bacteroidia; Bacteroidales; Prevotellaceae	3311215	4				4
JCM 13449	Prevotella denticola	Bacteria; Pseudomonadati; Bacteroidota; Bacteroidia; Bacteroidales; Prevotellaceae	3170192	3			1	1			1
JCM 15637	Prevotella histicola	Bacteria; Pseudomonadati; Bacteroidota; Bacteroidia; Bacteroidales; Prevotellaceae	2989316	2			1	1
JCM 17725	Prevotella scopos	Bacteria; Pseudomonadati; Bacteroidota; Bacteroidia; Bacteroidales; Prevotellaceae	3297307	2				2
JCM 15579	Marinifilum fragile	Bacteria; Pseudomonadati; Bacteroidota; Bacteroidia; Marinilabiliales; Marinifilaceae	4824975	1						1
JCM 15548	Geofilum rubicundum	Bacteria; Pseudomonadati; Bacteroidota; Bacteroidia; Marinilabiliales; Marinilabiliaceae	5202548	5		1		3		1
JCM 15069	Lutaonella thermophila	Bacteria; Pseudomonadati; Bacteroidota; Flavobacteriia; Flavobacteriales; Flavobacteriaceae	2369922	1						1
JCM 2013	Campylobacter jejuni subsp. jejuni	Bacteria; Pseudomonadati; Campylobacterota; Epsilonproteobacteria; Campylobacterales; Campylobacteraceae	1691630	1							1
JCM 11957	Caminibacter profundus	Bacteria; Pseudomonadati; Campylobacterota; Epsilonproteobacteria; Nautiliales; Nautiliaceae	1696866	2				2
JCM 15390	Nautilia abyssi	Bacteria; Pseudomonadati; Campylobacterota; Epsilonproteobacteria; Nautiliales; Nautiliaceae	1785770	2				2
JCM 12457	Thioreductor micantisoli	Bacteria; Pseudomonadati; Campylobacterota; Epsilonproteobacteria; Nautiliales; Thioreductoraceae	1709909	3				2			1
JCM 15827	Desulfurispirillum alkaliphilum	Bacteria; Pseudomonadati; Chrysiogenota; Chrysiogenia; Chrysiogenales; Chrysiogenaceae	2944714	2				1			1
JCM 17152	Oligosphaera ethanolica	Bacteria; Pseudomonadati; Lentisphaerota; Oligosphaeria; Oligosphaerales; Oligosphaeraceae	5729291	9		4	2	2		1
JCM 13213	Thermodesulfovibrio aggregans	Bacteria; Pseudomonadati; Nitrospirota; Thermodesulfovibrionia; Thermodesulfovibrionales; Thermodesulfovibrionaceae	1992120	1							1
JCM 13991	Thermodesulfovibrio hydrogeniphilus	Bacteria; Pseudomonadati; Nitrospirota; Thermodesulfovibrionia; Thermodesulfovibrionales; Thermodesulfovibrionaceae	2309952	1							1
JCM 17478	Thermopirellula anaerolimosa	Bacteria; Pseudomonadati; Planctomycetota; Planctomycetia	5188120	7		1		2		3	1
JCM 19991	Thermogutta hypogea	Bacteria; Pseudomonadati; Planctomycetota; Planctomycetia; Pirellulales; Thermoguttaceae	4666513	6		1		1		3	1
JCM 19992	Thermostilla marina	Bacteria; Pseudomonadati; Planctomycetota; Planctomycetia; Pirellulales; Thermoguttaceae	4964401	6		1		1		3	1
JCM 25146	Acetobacter okinawensis	Bacteria; Pseudomonadati; Pseudomonadota; Alphaproteobacteria; Acetobacterales; Acetobacteraceae	3228164	5				2		2	1
JCM 25330	Acetobacter persici	Bacteria; Pseudomonadati; Pseudomonadota; Alphaproteobacteria; Acetobacterales; Acetobacteraceae	3794388	10		2	1	2		2	3
JCM 15831	Asaia astilbis	Bacteria; Pseudomonadati; Pseudomonadota; Alphaproteobacteria; Acetobacterales; Acetobacteraceae	3227628	7		3	2	1		1
JCM 25414	Asaia platycodi	Bacteria; Pseudomonadati; Pseudomonadota; Alphaproteobacteria; Acetobacterales; Acetobacteraceae	3183544	5			1	1		1	2
JCM 25354	Asaia prunellae	Bacteria; Pseudomonadati; Pseudomonadota; Alphaproteobacteria; Acetobacterales; Acetobacteraceae	3210637	5		1	2	1		1
JCM 21176	Gluconobacter cerinus	Bacteria; Pseudomonadati; Pseudomonadota; Alphaproteobacteria; Acetobacterales; Acetobacteraceae	3433613	5			1	2		2
JCM 25156	Komagataeibacter kakiaceti	Bacteria; Pseudomonadati; Pseudomonadota; Alphaproteobacteria; Acetobacterales; Acetobacteraceae	3501158	5				2		2	1
JCM 2811	Methylorubrum rhodinum	Bacteria; Pseudomonadati; Pseudomonadota; Alphaproteobacteria; Hyphomicrobiales; Methylobacteriaceae	5486532	15		4	2	3		3	3
JCM 10893	Methylorubrum thiocyanatum	Bacteria; Pseudomonadati; Pseudomonadota; Alphaproteobacteria; Hyphomicrobiales; Methylobacteriaceae	5665914	10		2	1	2		3	2
JCM 18382	Bradyrhizobium sp.	Bacteria; Pseudomonadati; Pseudomonadota; Alphaproteobacteria; Hyphomicrobiales; Nitrobacteraceae	7763201	13		1	1	4		3	4
JCM 21793	Nitratireductor aquibiodomus	Bacteria; Pseudomonadati; Pseudomonadota; Alphaproteobacteria; Hyphomicrobiales; Phyllobacteriaceae	4551296	10		3	1	1		1	4
JCM 30711	Micropepsis pineolensis	Bacteria; Pseudomonadati; Pseudomonadota; Alphaproteobacteria; Micropepsales; Micropepsaceae	3443707	6		1	1	3		1
JCM 14636	Piezobacter thermophilus	Bacteria; Pseudomonadati; Pseudomonadota; Alphaproteobacteria; Rhodobacterales; Paracoccaceae	3519715	9		1	1			1	6
JCM 21060	Rhodocista centenaria	Bacteria; Pseudomonadati; Pseudomonadota; Alphaproteobacteria; Rhodospirillales; Azospirillaceae	4355489	5			1	1		2	1
JCM 19705	Fodinicurvata halophila	Bacteria; Pseudomonadati; Pseudomonadota; Alphaproteobacteria; Rhodospirillales; Fodinicurvataceae	3845258	8		1	1	2		1	3
JCM 17960	Magnetospira thiophila	Bacteria; Pseudomonadati; Pseudomonadota; Alphaproteobacteria; Rhodospirillales; Magnetospiraceae	3664293	5		3				1	1
JCM 23214	Sneathiella glossodoripedis	Bacteria; Pseudomonadati; Pseudomonadota; Alphaproteobacteria; Sneathiellales; Sneathiellaceae	3643617	4			1	1		1	1
JCM 12421	Thiobacter subterraneus	Bacteria; Pseudomonadati; Pseudomonadota; Betaproteobacteria; Burkholderiales	2751728	3						1	2
JCM 16107	Thiomonas islandica	Bacteria; Pseudomonadati; Pseudomonadota; Betaproteobacteria; Burkholderiales	2891380	6		2	2			1	1
JCM 18799	Achromobacter sp.	Bacteria; Pseudomonadati; Pseudomonadota; Betaproteobacteria; Burkholderiales; Alcaligenaceae	7232887	8		1	1			1	5
JCM 9787	Achromobacter xylosoxidans	Bacteria; Pseudomonadati; Pseudomonadota; Betaproteobacteria; Burkholderiales; Alcaligenaceae	6775260	9		1	1			1	6
JCM 20666	Alcaligenes faecalis	Bacteria; Pseudomonadati; Pseudomonadota; Betaproteobacteria; Burkholderiales; Alcaligenaceae	4190829	10		2				1	7
JCM 10599	Paraburkholderia kururiensis	Bacteria; Pseudomonadati; Pseudomonadota; Betaproteobacteria; Burkholderiales; Burkholderiaceae	7646841	17		3	3	3		3	5
JCM 12992	Neisseria mucosa	Bacteria; Pseudomonadati; Pseudomonadota; Betaproteobacteria; Neisseriales; Neisseriaceae	2688421	4				1		2	1
JCM 2850	Methylobacillus glycogenes	Bacteria; Pseudomonadati; Pseudomonadota; Betaproteobacteria; Nitrosomonadales; Methylophilaceae	3267308	4				3		1
JCM 15047	Thiobacillus thiophilus	Bacteria; Pseudomonadati; Pseudomonadota; Betaproteobacteria; Nitrosomonadales; Thiobacillaceae	3332510	4			1	2		1
JCM 12309	Thauera sp.	Bacteria; Pseudomonadati; Pseudomonadota; Betaproteobacteria; Rhodocyclales; Zoogloeaceae	4553146	8				4		1	3
JCM 14267	Alkalimonas collagenimarina	Bacteria; Pseudomonadati; Pseudomonadota; Gammaproteobacteria	3925287	6		1	3	1			1
JCM 14758	Shewanella algae	Bacteria; Pseudomonadati; Pseudomonadota; Gammaproteobacteria; Alteromonadales; Shewanellaceae	5059530	7			3	2			2
JCM 15074	Shewanella marina	Bacteria; Pseudomonadati; Pseudomonadota; Gammaproteobacteria; Alteromonadales; Shewanellaceae	4542382	4			1	3
JCM 14586	Thioprofundum lithotrophicum	Bacteria; Pseudomonadati; Pseudomonadota; Gammaproteobacteria; Chromatiales; Thioprofundaceae	2948094	3		1		1		1
JCM 20135	Escherichia coli	Bacteria; Pseudomonadati; Pseudomonadota; Gammaproteobacteria; Enterobacterales; Enterobacteriaceae	5034933	7		4	1	1			1
JCM 20051	Raoultella sp.	Bacteria; Pseudomonadati; Pseudomonadota; Gammaproteobacteria; Enterobacterales; Enterobacteriaceae	5410868	8		4	2	2
JCM 18900	Psychrobacter sp.	Bacteria; Pseudomonadati; Pseudomonadota; Gammaproteobacteria; Moraxellales; Moraxellaceae	3292555	3				1			2
JCM 18901	Psychrobacter sp.	Bacteria; Pseudomonadati; Pseudomonadota; Gammaproteobacteria; Moraxellales; Moraxellaceae	3181153	2				1			1
JCM 18902	Psychrobacter sp.	Bacteria; Pseudomonadati; Pseudomonadota; Gammaproteobacteria; Moraxellales; Moraxellaceae	3308282	1							1
JCM 18903	Psychrobacter sp.	Bacteria; Pseudomonadati; Pseudomonadota; Gammaproteobacteria; Moraxellales; Moraxellaceae	3551736	1							1
JCM 16084	Halomonas beimenensis	Bacteria; Pseudomonadati; Pseudomonadota; Gammaproteobacteria; Oceanospirillales; Halomonadaceae	4053137	8		1		2			5
JCM 16914	Halomonas cibimaris	Bacteria; Pseudomonadati; Pseudomonadota; Gammaproteobacteria; Oceanospirillales; Halomonadaceae	2676578	3				1		1	1
JCM 30151	Halomonas garicola	Bacteria; Pseudomonadati; Pseudomonadota; Gammaproteobacteria; Oceanospirillales; Halomonadaceae	2945007	8		2	1	2			3
JCM 14803	Halomonas salifodinae	Bacteria; Pseudomonadati; Pseudomonadota; Gammaproteobacteria; Oceanospirillales; Halomonadaceae	4392743	8		2		3			3
JCM 21221	Halomonas salina	Bacteria; Pseudomonadati; Pseudomonadota; Gammaproteobacteria; Oceanospirillales; Halomonadaceae	3562246	5				2			3
JCM 19368	Halomonas shantousis	Bacteria; Pseudomonadati; Pseudomonadota; Gammaproteobacteria; Oceanospirillales; Halomonadaceae	4078808	6		1	1	2		1	1
JCM 20774	Marinomonas vaga	Bacteria; Pseudomonadati; Pseudomonadota; Gammaproteobacteria; Oceanospirillales; Oceanospirillaceae	3774128	5		1		1			3
JCM 2434	Aggregatibacter actinomycetemcomitans	Bacteria; Pseudomonadati; Pseudomonadota; Gammaproteobacteria; Pasteurellales; Pasteurellaceae	2158409	2			1	1
JCM 12291	Marinobacter alkaliphilus	Bacteria; Pseudomonadati; Pseudomonadota; Gammaproteobacteria; Pseudomonadales; Marinobacteraceae	4115459	6				2			4
JCM 21475	Azotobacter vinelandii	Bacteria; Pseudomonadati; Pseudomonadota; Gammaproteobacteria; Pseudomonadales; Pseudomonadaceae	5379020	13		5	2	2		1	3
JCM 6156	Pseudomonas putida	Bacteria; Pseudomonadati; Pseudomonadota; Gammaproteobacteria; Pseudomonadales; Pseudomonadaceae	6300533	12		3		7			2
JCM 15514	Salinisphaera hydrothermalis	Bacteria; Pseudomonadati; Pseudomonadota; Gammaproteobacteria; Salinisphaerales; Salinisphaeraceae	4203631	9		1	1			1	6
JCM 12397	Hydrogenovibrio thermophilus	Bacteria; Pseudomonadati; Pseudomonadota; Gammaproteobacteria; Thiotrichales; Piscirickettsiaceae	2567456	6			2	2			2
JCM 30760	Thiomicrorhabdus hydrogeniphila	Bacteria; Pseudomonadati; Pseudomonadota; Gammaproteobacteria; Thiotrichales; Piscirickettsiaceae	3033949	4			1	2			1
JCM 18905	Vibrio sp.	Bacteria; Pseudomonadati; Pseudomonadota; Gammaproteobacteria; Vibrionales; Vibrionaceae	5258283	5			1	1			3
JCM 10831	Hydrogenophilus hirschii	Bacteria; Pseudomonadati; Pseudomonadota; Hydrogenophilia; Hydrogenophilales; Hydrogenophilaceae	2204160	4		1		1			2
JCM 9785	Rhodothermus marinus	Bacteria; Pseudomonadati; Rhodothermota; Rhodothermia; Rhodothermales; Rhodothermaceae	3410344	4				2		2
JCM 31343	Longimonas haloalkaliphila	Bacteria; Pseudomonadati; Rhodothermota; Rhodothermia; Rhodothermales; Salinibacteraceae	3887148	5			1	2		2
JCM 31342	Natronotalea proteinilytica	Bacteria; Pseudomonadati; Rhodothermota; Rhodothermia; Rhodothermales; Salisaetaceae	3839310	4			1	1		2
JCM 14728	Exilispira thermophila	Bacteria; Pseudomonadati; Spirochaetota; Spirochaetia; Spirochaetales	3076775	5		2	1	1			1
JCM 31475	Pleomorphochaeta caudata	Bacteria; Pseudomonadati; Spirochaetota; Spirochaetia; Spirochaetales; Sphaerochaetaceae	3256340	1						1
JCM 19179	Desulfatiglans parachlorophenolica	Bacteria; Pseudomonadati; Thermodesulfobacteriota; Desulfobacteria; Desulfatiglandales; Desulfatiglandaceae	5748599	7		1		4			2
JCM 16085	Desulfoconvexum algidum	Bacteria; Pseudomonadati; Thermodesulfobacteriota; Desulfobacteria; Desulfobacterales; Desulfobacteraceae	6914574	13			4	3			6
JCM 19994	Desulfogranum aggregans	Bacteria; Pseudomonadati; Thermodesulfobacteriota; Desulfobulbia; Desulfobulbales; Desulfobulbaceae	4815315	7		1		4			2
JCM 14714	Desulfomicrobium aestuarii	Bacteria; Pseudomonadati; Thermodesulfobacteriota; Desulfovibrionia; Desulfovibrionales; Desulfomicrobiaceae	3916872	3				2			1
JCM 14713	Desulfomicrobium salsuginis	Bacteria; Pseudomonadati; Thermodesulfobacteriota; Desulfovibrionia; Desulfovibrionales; Desulfomicrobiaceae	4027265	3		1		1			1
JCM 31598	Desulfonatronum parangueonense	Bacteria; Pseudomonadati; Thermodesulfobacteriota; Desulfovibrionia; Desulfovibrionales; Desulfonatronaceae	5017389	9		1		4			4
JCM 13028	Desulfonauticus autotrophicus	Bacteria; Pseudomonadati; Thermodesulfobacteriota; Desulfovibrionia; Desulfovibrionales; Desulfonauticaceae	2265687	2				2
JCM 12298	Desulfothermus naphthae	Bacteria; Pseudomonadati; Thermodesulfobacteriota; Desulfovibrionia; Desulfovibrionales; Desulfothermaceae	3299280	5				1			4
JCM 16814	Desulfobaculum senezii	Bacteria; Pseudomonadati; Thermodesulfobacteriota; Desulfovibrionia; Desulfovibrionales; Desulfovibrionaceae	4096534	3				3
JCM 18546	Desulfocurvus thunnarius	Bacteria; Pseudomonadati; Thermodesulfobacteriota; Desulfovibrionia; Desulfovibrionales; Desulfovibrionaceae	3614815	6		2	1	2			1
JCM 30146	Desulfovibrio biadhensis	Bacteria; Pseudomonadati; Thermodesulfobacteriota; Desulfovibrionia; Desulfovibrionales; Desulfovibrionaceae	5182856	4			2	2
JCM 16812	Desulfovibrio simplex	Bacteria; Pseudomonadati; Thermodesulfobacteriota; Desulfovibrionia; Desulfovibrionales; Desulfovibrionaceae	3802826	7		2	1	2			2
JCM 15519	Fundidesulfovibrio butyratiphilus	Bacteria; Pseudomonadati; Thermodesulfobacteriota; Desulfovibrionia; Desulfovibrionales; Desulfovibrionaceae	4293546	7		2		3			2
JCM 15971	Halodesulfovibrio oceani subsp. galateae	Bacteria; Pseudomonadati; Thermodesulfobacteriota; Desulfovibrionia; Desulfovibrionales; Desulfovibrionaceae	4110717	11		1	2	2			6
JCM 15970	Halodesulfovibrio oceani subsp. oceani	Bacteria; Pseudomonadati; Thermodesulfobacteriota; Desulfovibrionia; Desulfovibrionales; Desulfovibrionaceae	4103490	8		2		2			4
JCM 14124	Humidesulfovibrio idahonensis	Bacteria; Pseudomonadati; Thermodesulfobacteriota; Desulfovibrionia; Desulfovibrionales; Desulfovibrionaceae	3497923	6		1	2	2			1
JCM 31065	Maridesulfovibrio salinus	Bacteria; Pseudomonadati; Thermodesulfobacteriota; Desulfovibrionia; Desulfovibrionales; Desulfovibrionaceae	4400874	6				3		1	2
JCM 14635	Megalodesulfovibrio paquesii	Bacteria; Pseudomonadati; Thermodesulfobacteriota; Desulfovibrionia; Desulfovibrionales; Desulfovibrionaceae	4514617	1				1
JCM 14040	Oceanidesulfovibrio marinus	Bacteria; Pseudomonadati; Thermodesulfobacteriota; Desulfovibrionia; Desulfovibrionales; Desulfovibrionaceae	4938361	5		1		3			1
JCM 15785	Oleidesulfovibrio vietnamensis	Bacteria; Pseudomonadati; Thermodesulfobacteriota; Desulfovibrionia; Desulfovibrionales; Desulfovibrionaceae	3633309	8		1	1	4			2
JCM 30471	Desulfuromonas carbonis	Bacteria; Pseudomonadati; Thermodesulfobacteriota; Desulfuromonadia; Desulfuromonadales; Desulfuromonadaceae	3953300	6		1	2	2			1
JCM 12927	Desulfuromonas svalbardensis	Bacteria; Pseudomonadati; Thermodesulfobacteriota; Desulfuromonadia; Desulfuromonadales; Desulfuromonadaceae	3257116	9		1	4	1			3
JCM 12926	Desulfuromusa ferrireducens	Bacteria; Pseudomonadati; Thermodesulfobacteriota; Desulfuromonadia; Desulfuromonadales; Desulfuromonadaceae	4446708	6		1	3	1			1
JCM 16410	Desulfosoma profundi	Bacteria; Pseudomonadati; Thermodesulfobacteriota; Syntrophobacteria; Syntrophobacterales; Syntrophobacteraceae	3797180	5			1	2			2
JCM 14805	Prosthecobacter fluviatilis	Bacteria; Pseudomonadati; Verrucomicrobiota; Verrucomicrobiia; Verrucomicrobiales; Verrucomicrobiaceae	6449430	9			4	2		3
JCM 11602	Thermus brockianus	Bacteria; Thermotogati; Deinococcota; Deinococci; Thermales; Thermaceae	2472090	1						1
JCM 19320	Aminobacterium thunnarium	Bacteria; Thermotogati; Synergistota; Synergistia; Synergistales; Aminobacteriaceae	2355962	1				1
JCM 17151	Lactivibrio alcoholicus	Bacteria; Thermotogati; Synergistota; Synergistia; Synergistales; Aminobacteriaceae	3538732	3				2			1
JCM 18154	Mesotoga infera	Bacteria; Thermotogati; Thermotogota; Thermotogae; Kosmotogales; Kosmotogaceae	2968814	2				1			1
JCM 17210	Defluviitoga tunisiensis	Bacteria; Thermotogati; Thermotogota; Thermotogae; Petrotogales; Petrotogaceae	2194816	1				1
